# Supplementary material for: Mass spectrometry-based proteomics to study gastric carcinogenesis: pathophysiological molecular characterization
Source: Research Square preprint supplement (doi:10.21203/rs.3.rs-7685514/v1), 2025-10-23

# **Mass spectrometry-based proteomics to study gastric carcinogenesis: pathophysiological molecular characterization.**

Nayra Felípez <sup>1</sup>, Sheyla Montori <sup>1</sup>, Alba Valero <sup>1</sup>, Enrique Santamaría <sup>2</sup>, Karina Ausin <sup>2</sup>, Erika Peral <sup>2</sup>, Joan Llach <sup>3,4</sup>, Pedro Delgado <sup>5</sup>, Pablo Florez-Diez <sup>6</sup>, Eva Barreiro <sup>6</sup>, Elena Arruebo <sup>7</sup>, Raquel Vicente <sup>7</sup>, M Teresa Soria <sup>7</sup>, Alain Huerta <sup>8</sup>, Silvia Patricia Ortega <sup>9</sup>, Henar Núñez <sup>10</sup>, Pilar Díez <sup>10</sup>, Alberto Herreros <sup>11</sup>, Gadea Hontoria <sup>12</sup>, Rosa María Saíz <sup>12</sup>, Luis Hernández <sup>13</sup>, Carolina Mangas-Sanjuan <sup>13</sup>, Oliver Patrón <sup>14</sup>, Gonzalo Hijos-Mallada <sup>15</sup>, María José Domper <sup>15</sup>, Sara Zarraquiños <sup>16</sup>, Astrid Irene Díez-Martín <sup>16</sup>, Patricia Gonçalves <sup>17</sup>, Diego de Frutos <sup>11</sup>, José Santiago <sup>11</sup>, Adelina García <sup>18</sup>, Alicia Martín-Lagos <sup>18</sup>, Fermín Estremera-Arévalo <sup>19</sup>, Marta Gómez Alonso <sup>19</sup>, Anabella Cuestas <sup>3,4</sup>, Francesc Balaguer <sup>3,4</sup>, Sergi Castellví-Bel <sup>3,4</sup>, Glòria Fernandez-Esparrach <sup>3,4</sup>, Miriam Cuatrecasas <sup>20</sup>, Leticia Moreira <sup>3,4</sup>, Joaquín Fernández-Irigoyen <sup>2</sup>, Eduardo Albéniz <sup>19</sup>, EpiGASTRIC EDGAR Consortium.

Corresponding authors:

Joaquín Fernández-Irigoyen (Email: joaquin.fernandez.irigoyen@navarra.es) and Eduardo Albéniz (Email: eduardo.albeniz.arbizu@navarra.es)

**This file includes:**

Supplementary Figures S1-S8.

## Supplementary information:

**Figure S1.** **A.** Volcano plots representing the Log2 fold-change of identified protein with associated *p* values from the comparisons of benign/malignancy stages vs control group. **B.** Volcano plots representing the Log2 fold-change of identified protein with associated *p* values from the comparisons of adjacent tissues from malignancy stages vs control group. Red and green, up- and down-regulated protein, respectively.

**Figure S2.** **A.** Venn diagram of unique and common proteins in malignancy stages. **B.** Heatmap of unique and shared pathways between malignancy stages. **C.** Venn diagram of proteins involved in neutrophil degranulation in lesional and non-lesional tissue.

**Figure S3.** Mass spectrometry-based quantitation boxplots of common protein deregulation **A.** rRNA processing, **B.** lysine catabolism and **C.** phase II: conjugation of compounds in EGC-L vs control and GC-NL vs control. Unpaired t-test for equal variances with/without Welch correction, or Wilcoxon rank-sum test. \**p* < 0.05; \*\**p* < 0.01, \*\*\**p* < 0.001 vs. control group and between groups (EGC = early gastric cancer, and GC = gastric cancer, NL = nonlesional, L = lesion).

**Figure S4.** Mass spectrometry-based quantitation boxplots of common protein deregulation **A.** aflatoxin activation and detoxification in malignant tissues and **B.** formation of fibrin clot/antimicrobial peptides across almost all tissue types (except CG). Unpaired t-test for equal variances with/without Welch correction, or Wilcoxon rank-sum test. \**p* < 0.05; \*\**p* < 0.01, \*\*\**p* < 0.001 vs. control group and between groups (IM-LGD = intestinal metaplasia-low grade dysplasia, EGC = early gastric cancer, and GC = gastric cancer, NL = nonlesional, L = lesion).

**Figure S5.** Mass spectrometry-based quantitation boxplots of common protein deregulation **A.** vpr-mediated induction of apoptosis, **B.** signaling by high kinase activity BRAF mutants, **C.** hyaluronan uptake and degradation and **D.** regulation of insulin-like growth factor in IM-LGD-L vs control, EGC-L vs control and GC-NL vs control. Unpaired t-test for equal variances with/without Welch correction, or Wilcoxon rank-sum test. \**p* < 0.05; \*\**p* < 0.01, \*\*\**p* < 0.001 vs. control group and between groups (IM-LGD = intestinal metaplasia-low grade dysplasia, EGC = early gastric cancer, and GC = gastric cancer, NL = nonlesional, L = lesion).

**Figure S6.** Mass spectrometry-based quantitation boxplots of common protein deregulation **A.** aerobic respiration and respiratory electron transport in almost all tissues (except EGC-NL). Unpaired t-test for equal variances with/without Welch correction, or Wilcoxon rank-sum test. \**p* < 0.05; \*\**p* < 0.01, \*\*\**p* < 0.001 vs. control group and between groups (IM-LGD = intestinal metaplasia-low grade dysplasia, EGC = early gastric cancer, and GC = gastric cancer, NL = nonlesional, L = lesion).

**Figure S7.** Mass spectrometry-based quantitation boxplots of common protein deregulation **A.** neutrophil degranulation in all tissues. Unpaired t-test for equal variances with/without Welch correction, or Wilcoxon rank-sum test. \* $p < 0.05$ ; \*\* $p < 0.01$ , \*\*\* $p < 0.001$  vs. control group and between groups (IM-LGD = intestinal metaplasia-low grade dysplasia, EGC = early gastric cancer, and GC = gastric cancer, NL = nonlesional, L = lesion).

**Figure S8.** Mass spectrometry-based quantitation boxplots of specific comparisons of protein deregulation in neutrophil degranulation **A.** EGC-L vs control, GC-L vs control, GC-NL vs control. **B.** IM-LGD-L vs control EGC-L vs control. Unpaired t-test for equal variances with/without Welch correction, or Wilcoxon rank-sum test. \* $p < 0.05$ ; \*\* $p < 0.01$ , \*\*\* $p < 0.001$  vs. control group and between groups (IM-LGD = intestinal metaplasia-low grade dysplasia, EGC = early gastric cancer, and GC = gastric cancer, NL = nonlesional, L = lesion).

Figure S1.

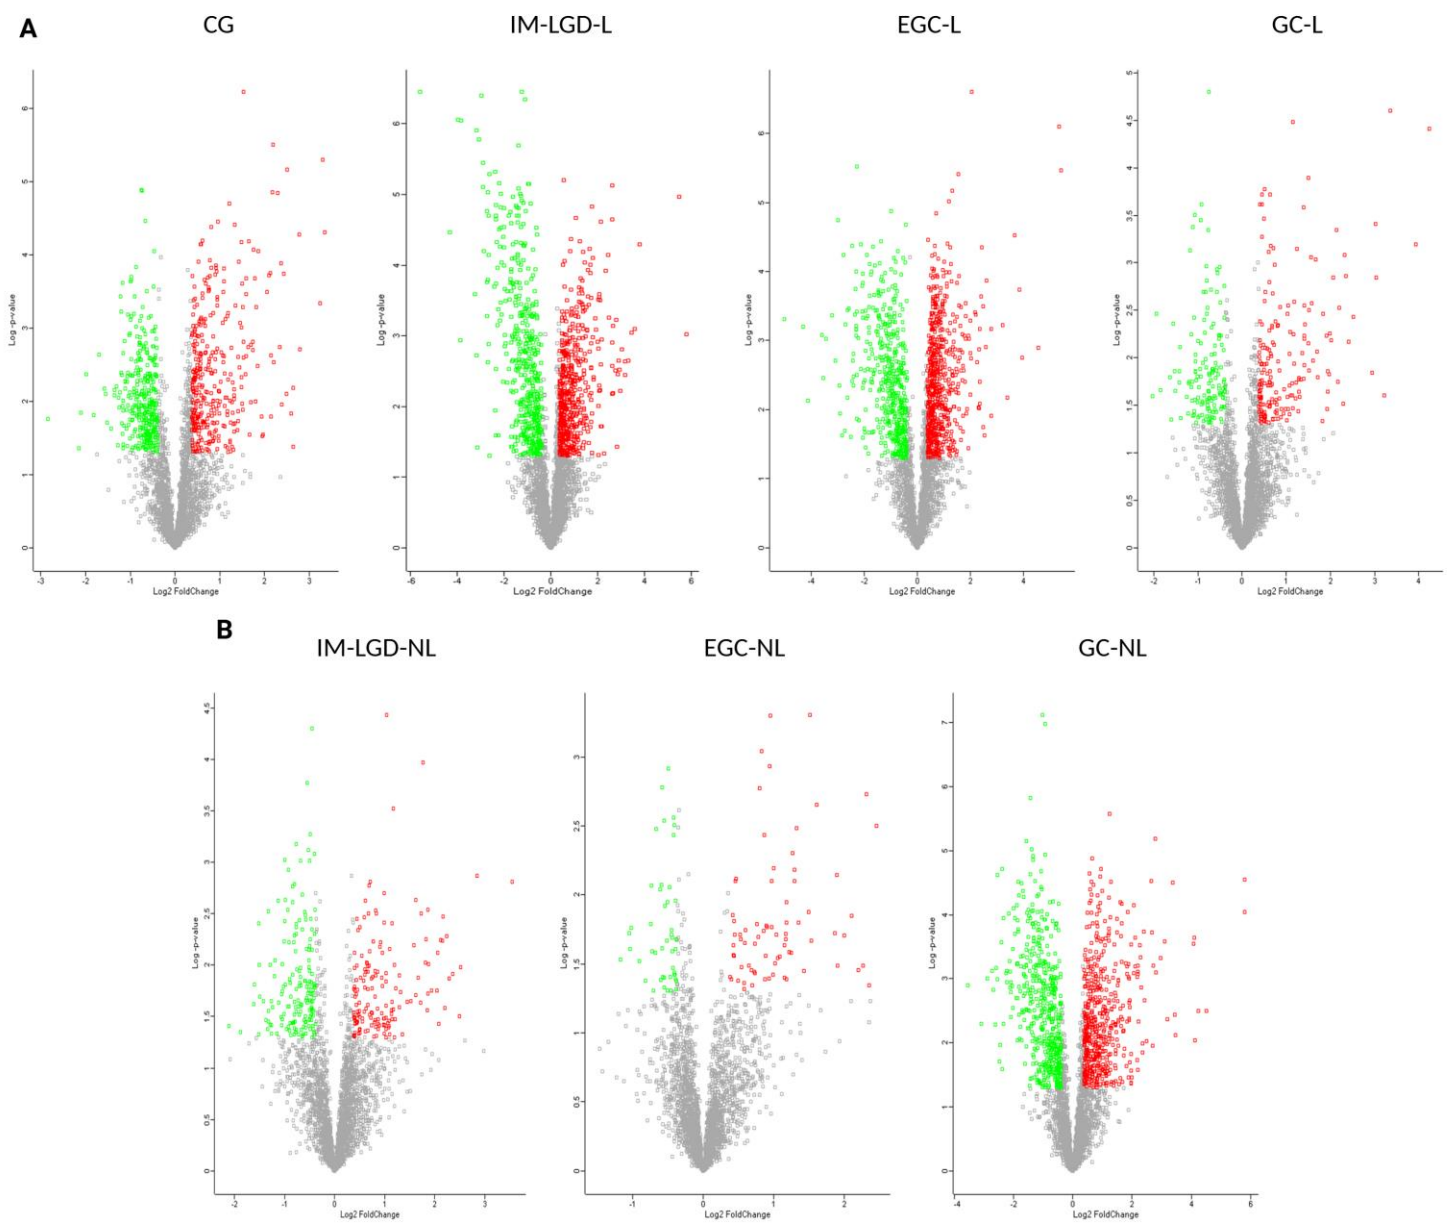

Figure S2.

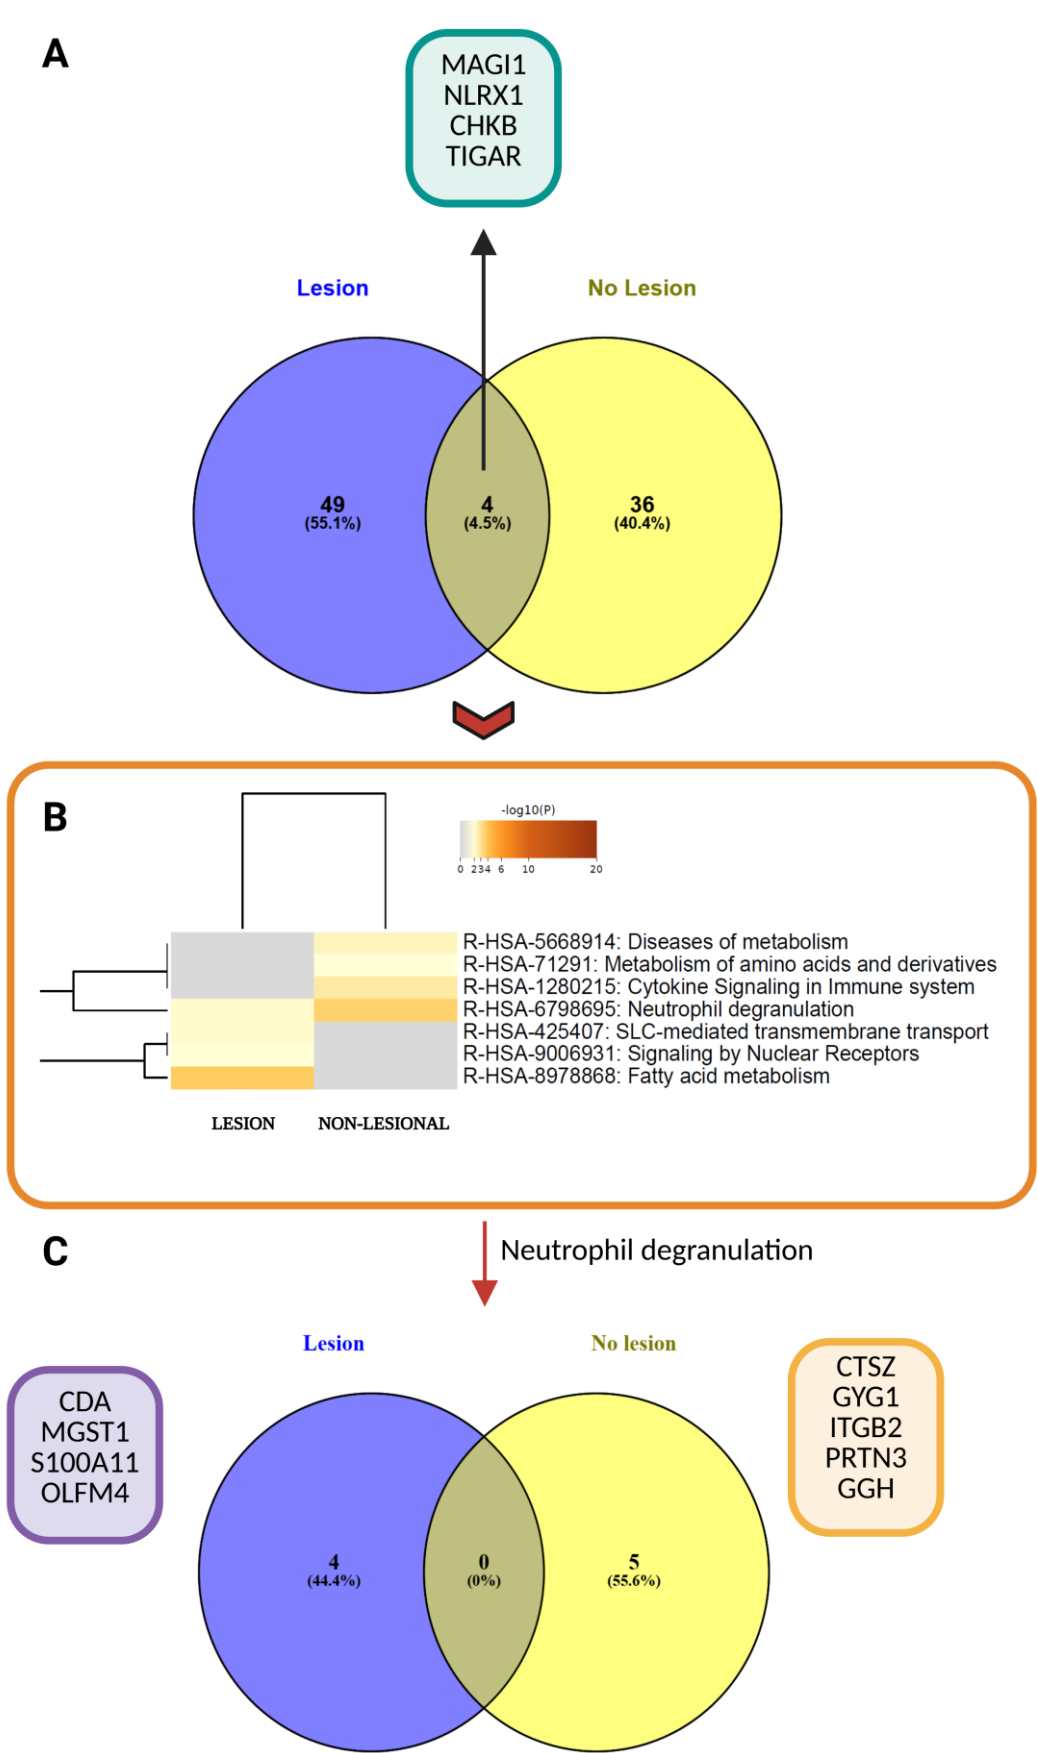

Figure S3.

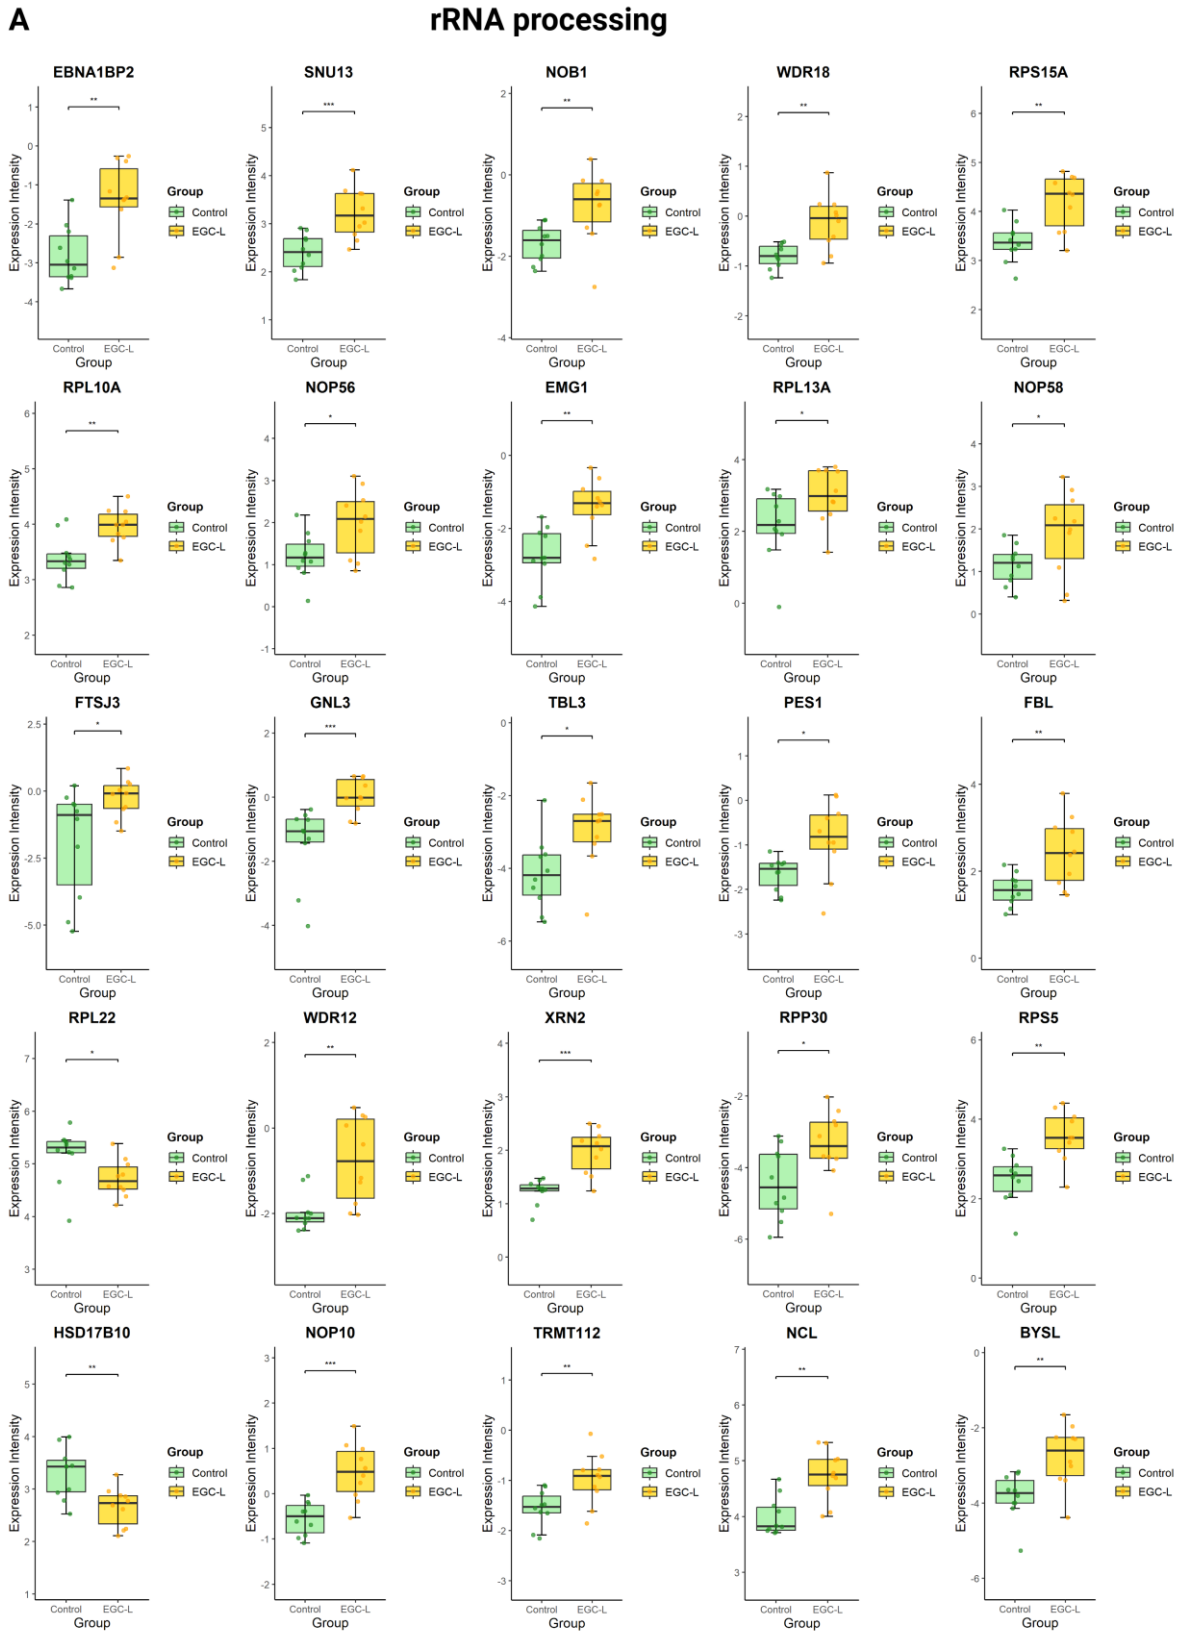

A

## rRNA processing

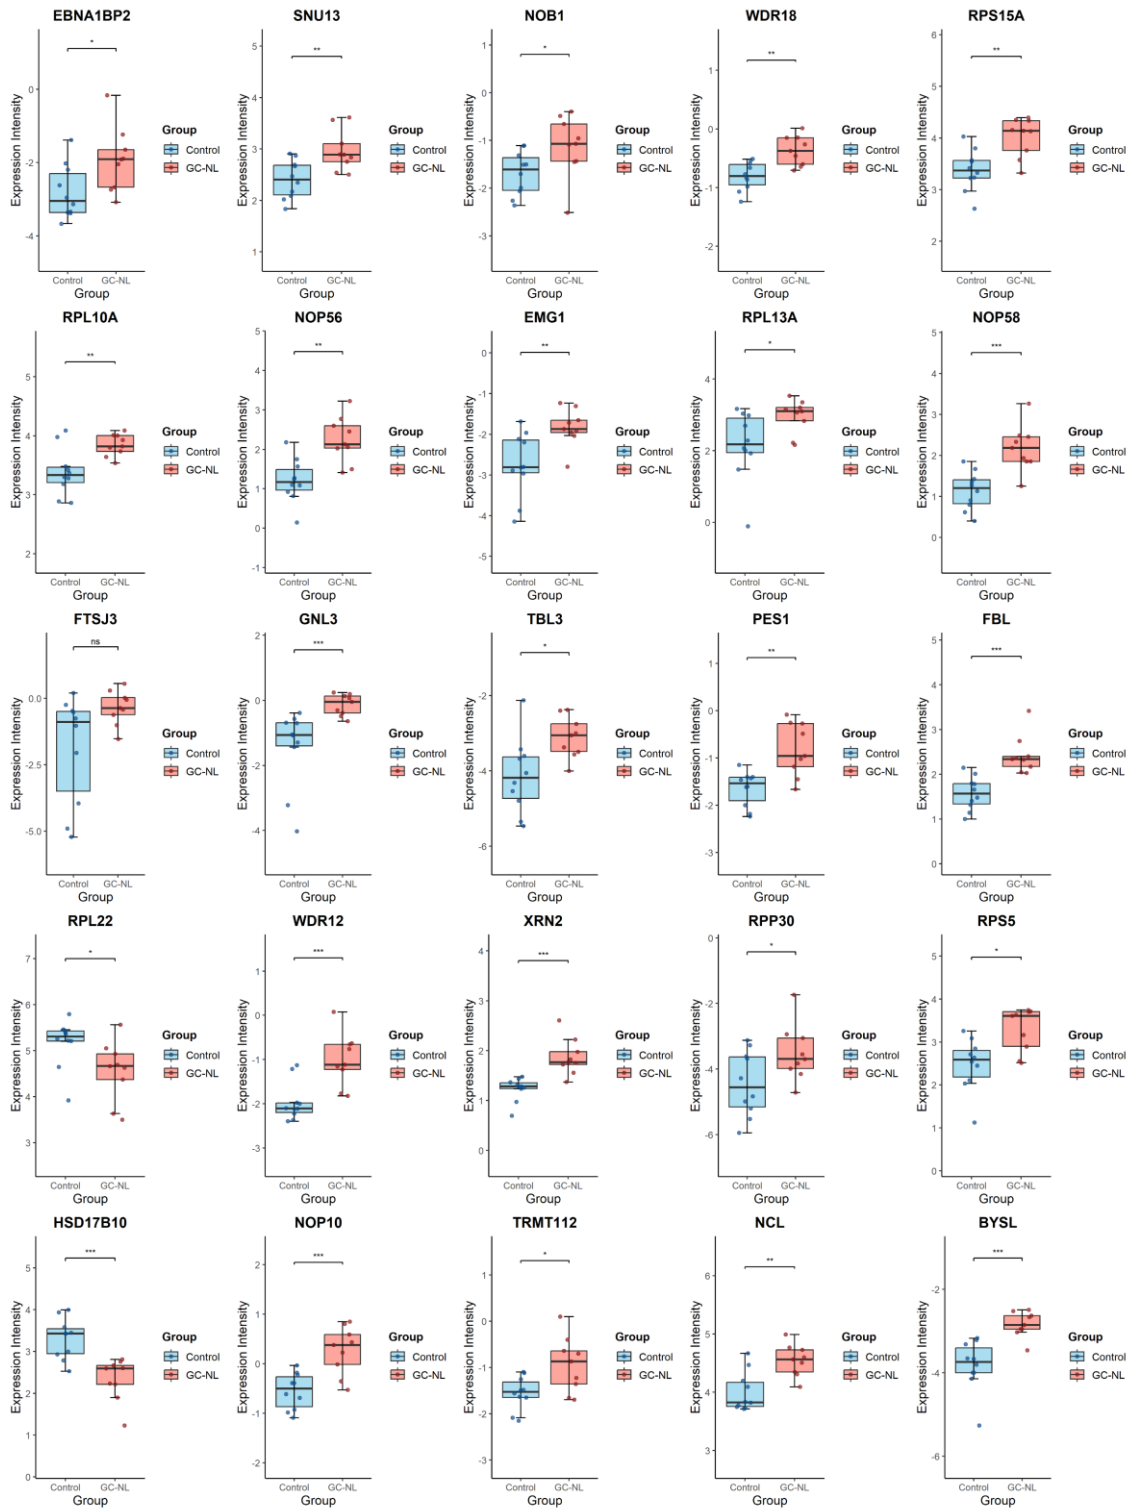

**B**

## Lysine catabolism

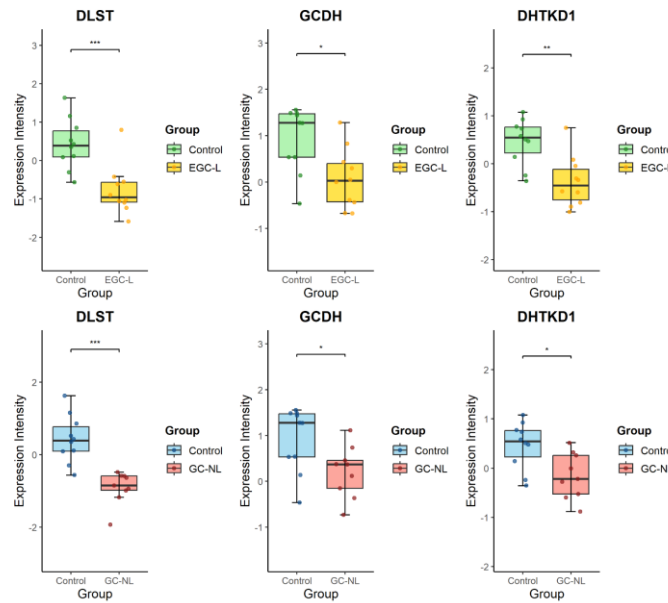

**C**

## Phase II - Conjugation of compounds

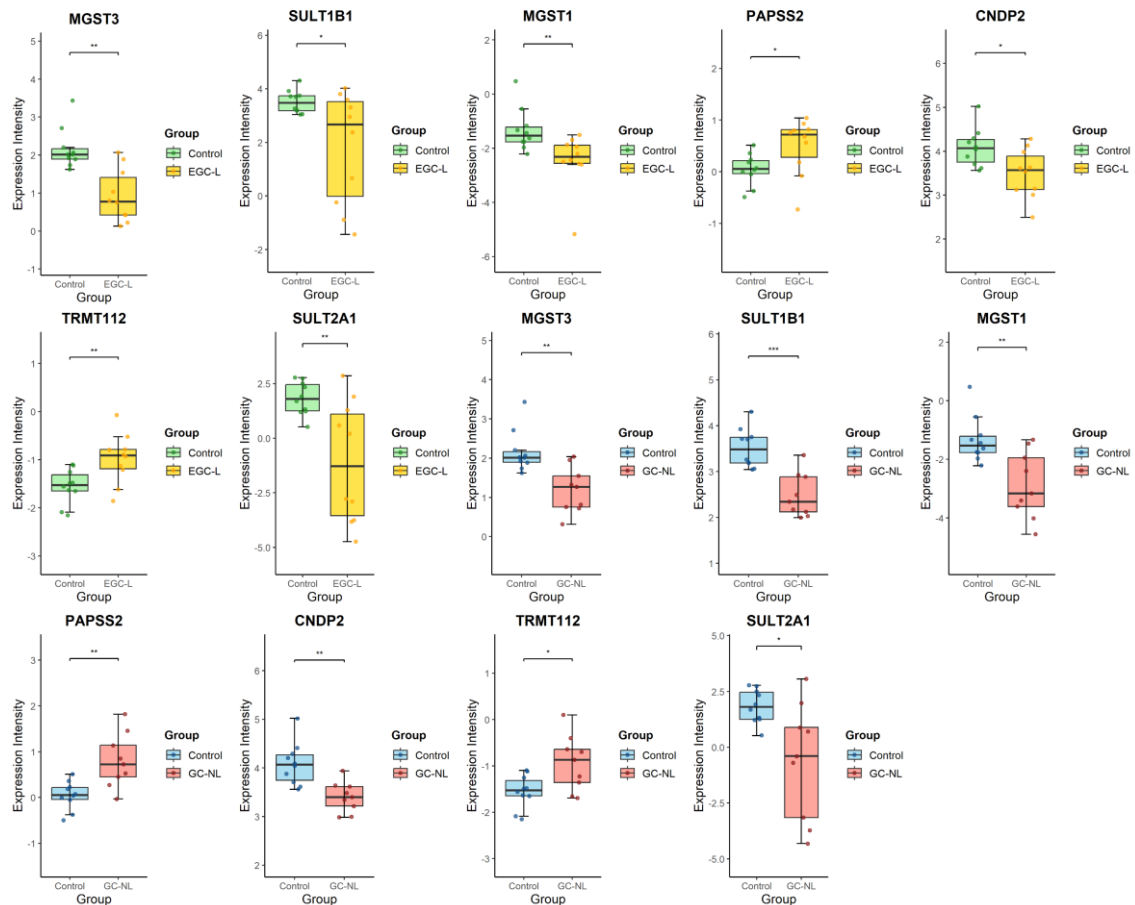

Figure S4.

A

Aflatoxin activation and detoxification

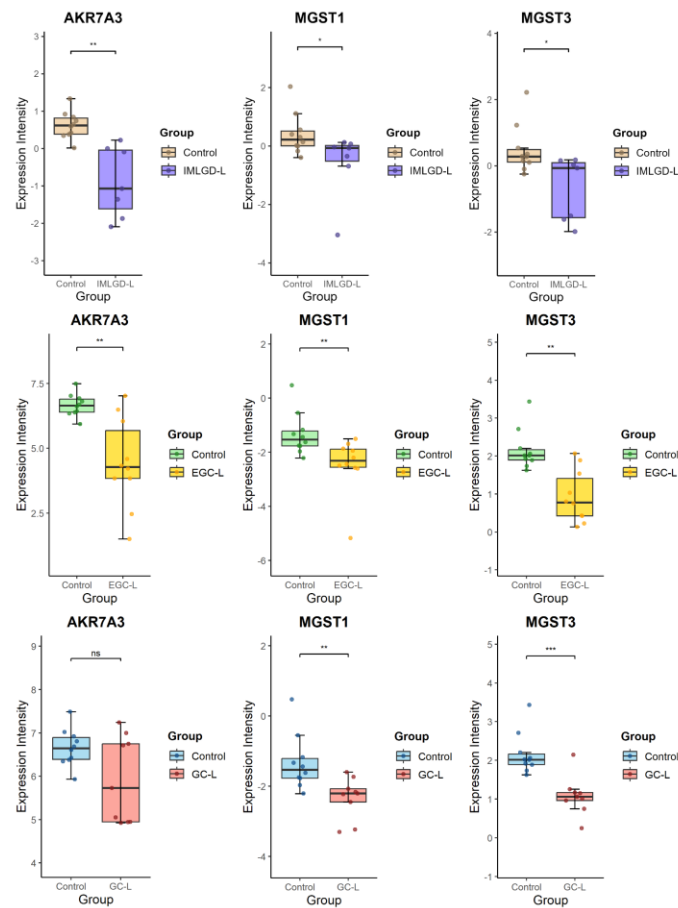

B

Formation of Fibrin Clot (Clotting Cascade) / Antimicrobial peptides

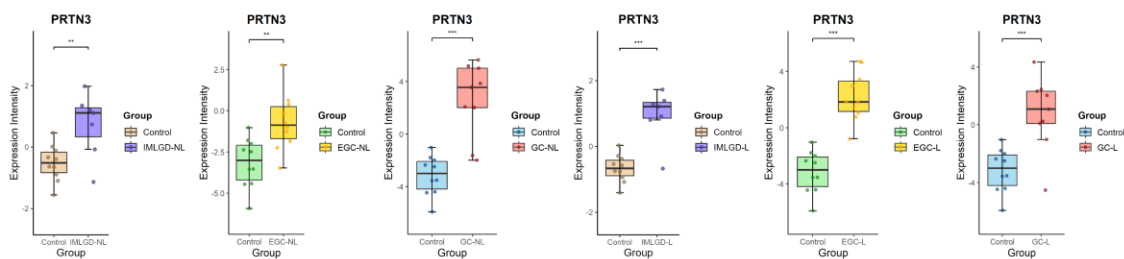

Figure S5.

**A Vpr-mediated induction of apoptosis by mitochondrial outer membrane permeabilization** **B Signaling by high-kinase activity BRAF mutants**

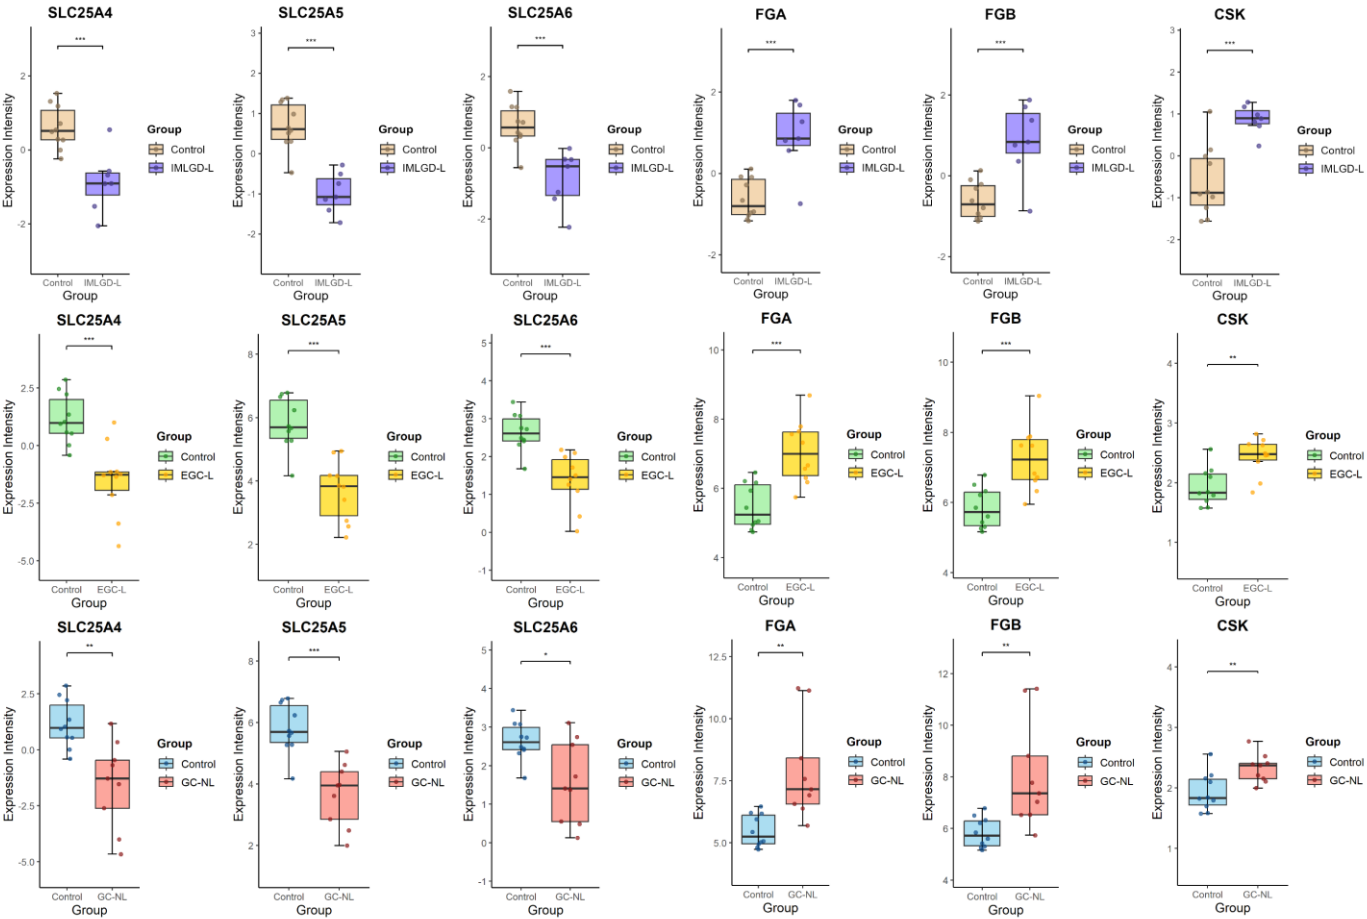

**C Hyaluronan uptake and degradation**

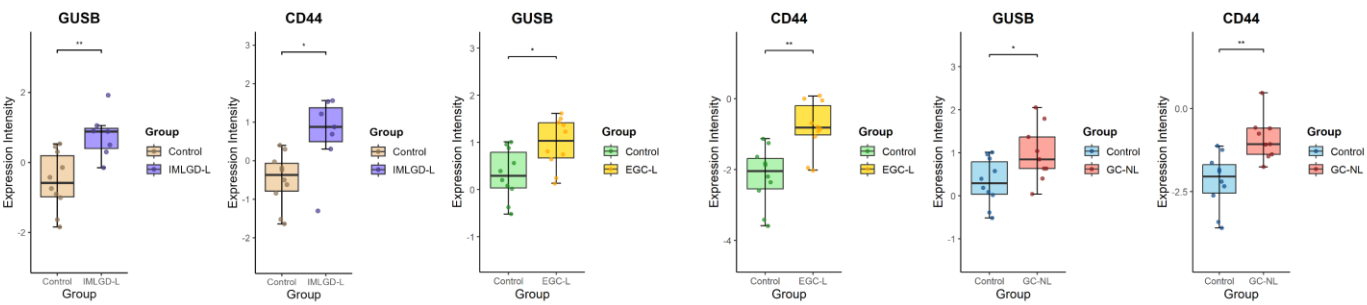

## D Regulation of Insulin-like Growth Factor (IGF) transport and uptake by Insulin-like Growth Factor Binding Proteins (IGFBPs)

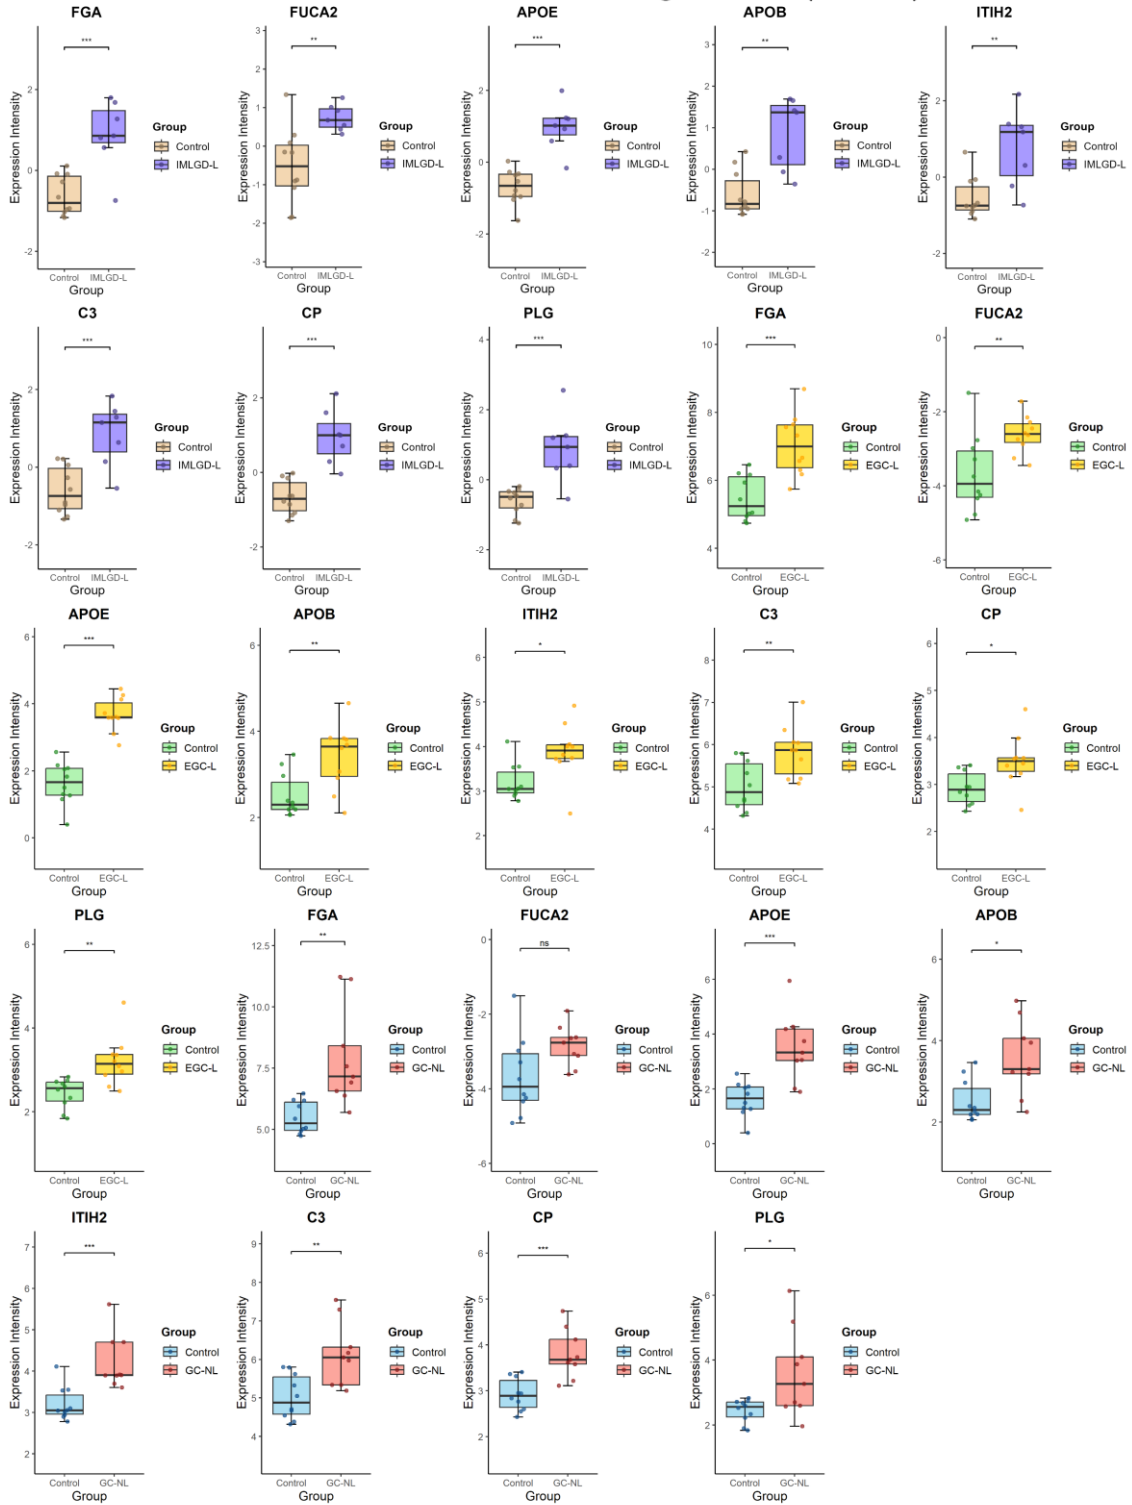

Figure S6.

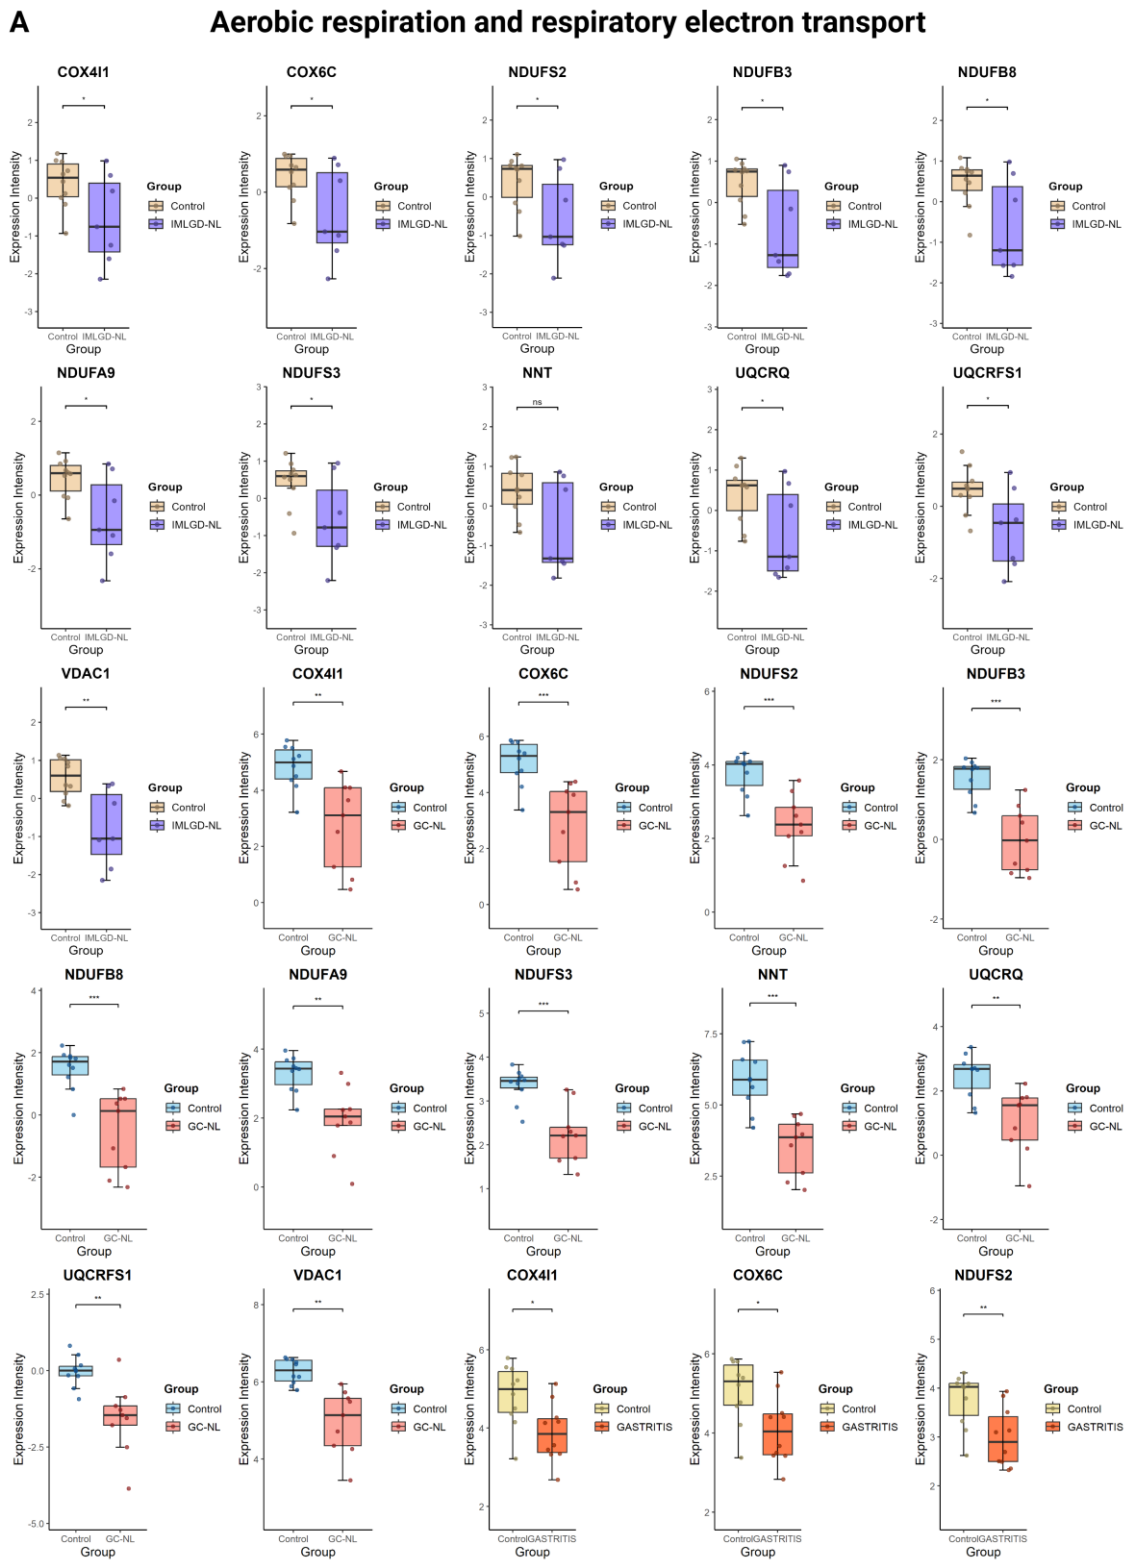

## A Aerobic respiration and respiratory electron transport

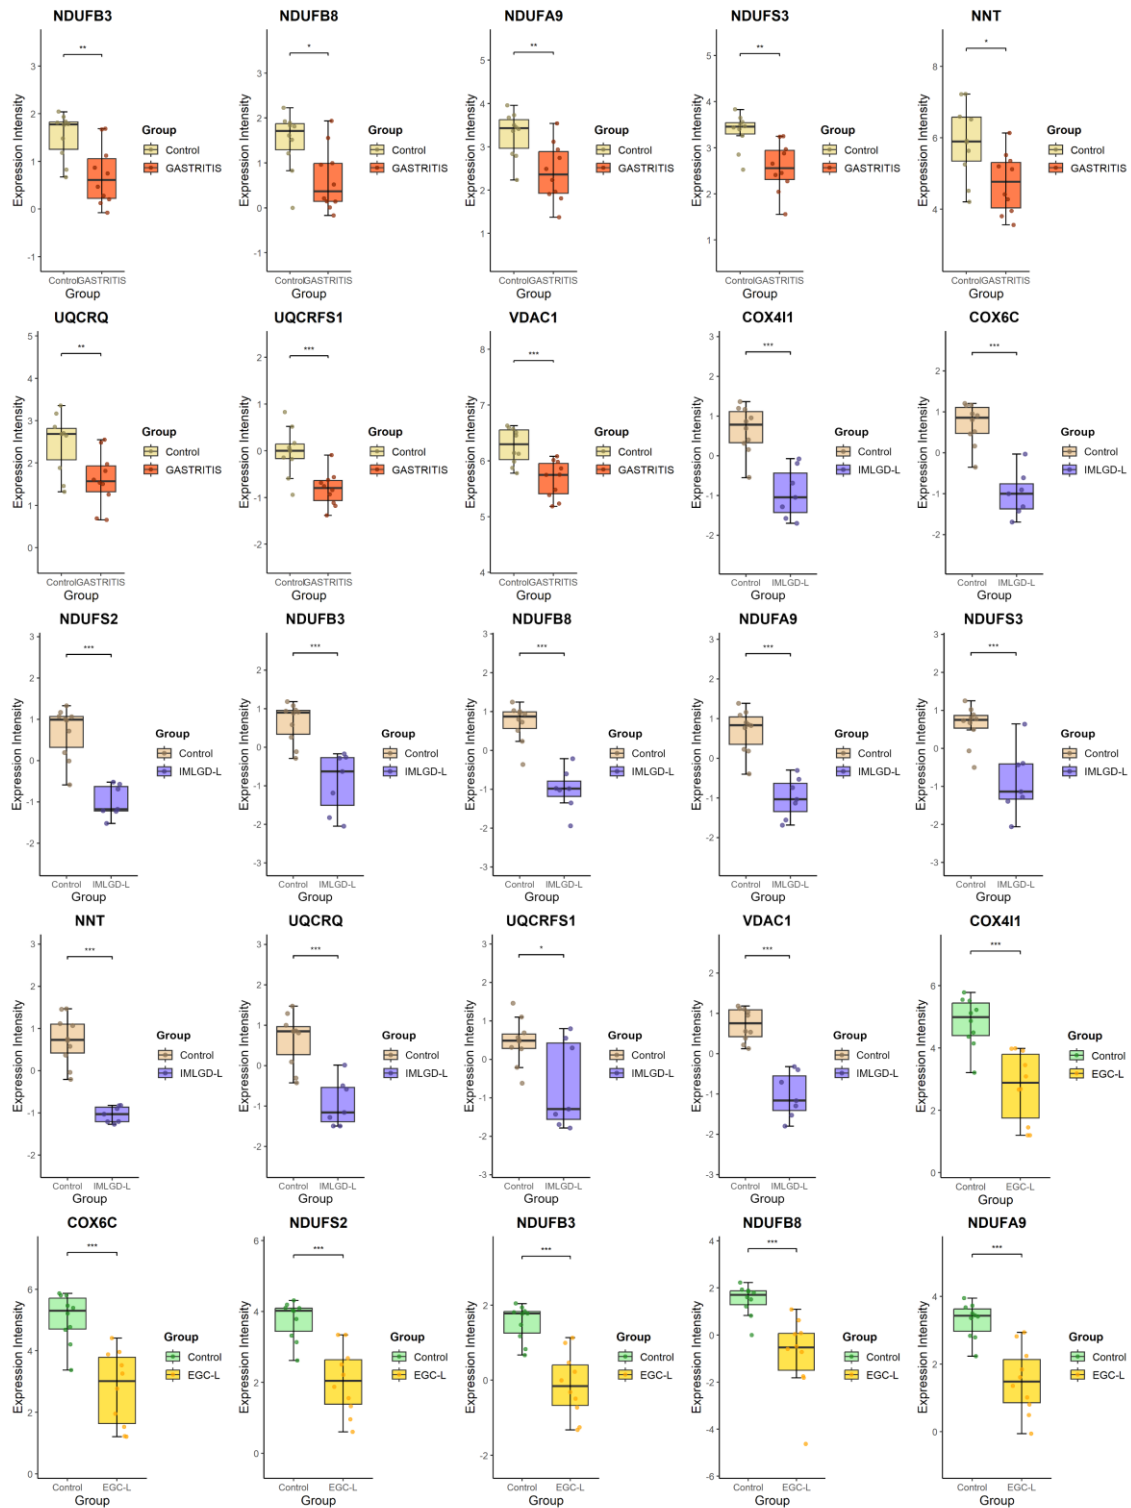

**A**

## Aerobic respiration and respiratory electron transport

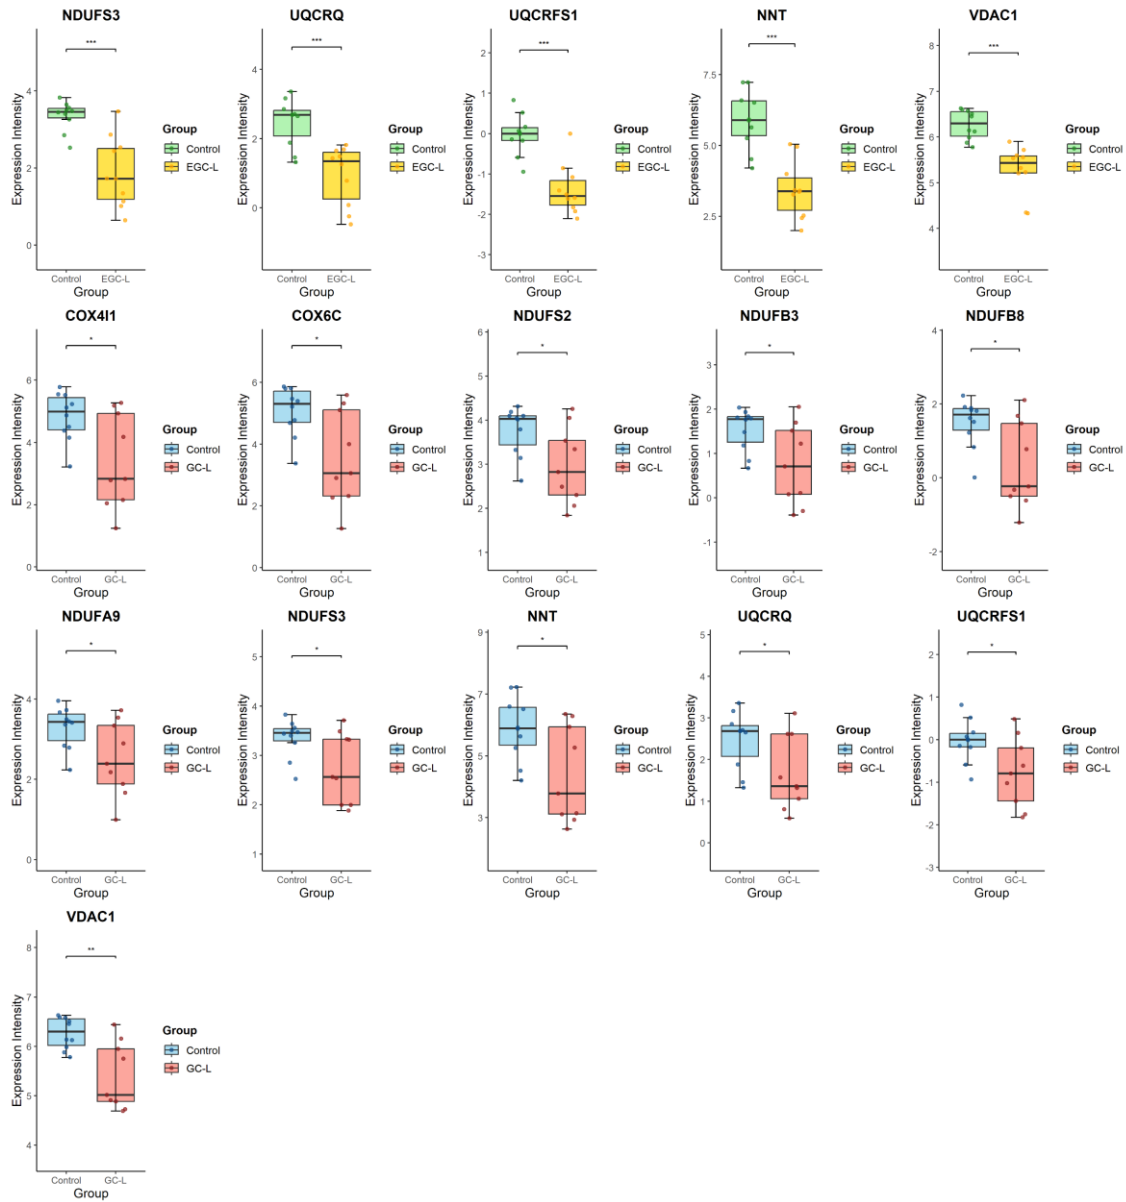

Figure S7.

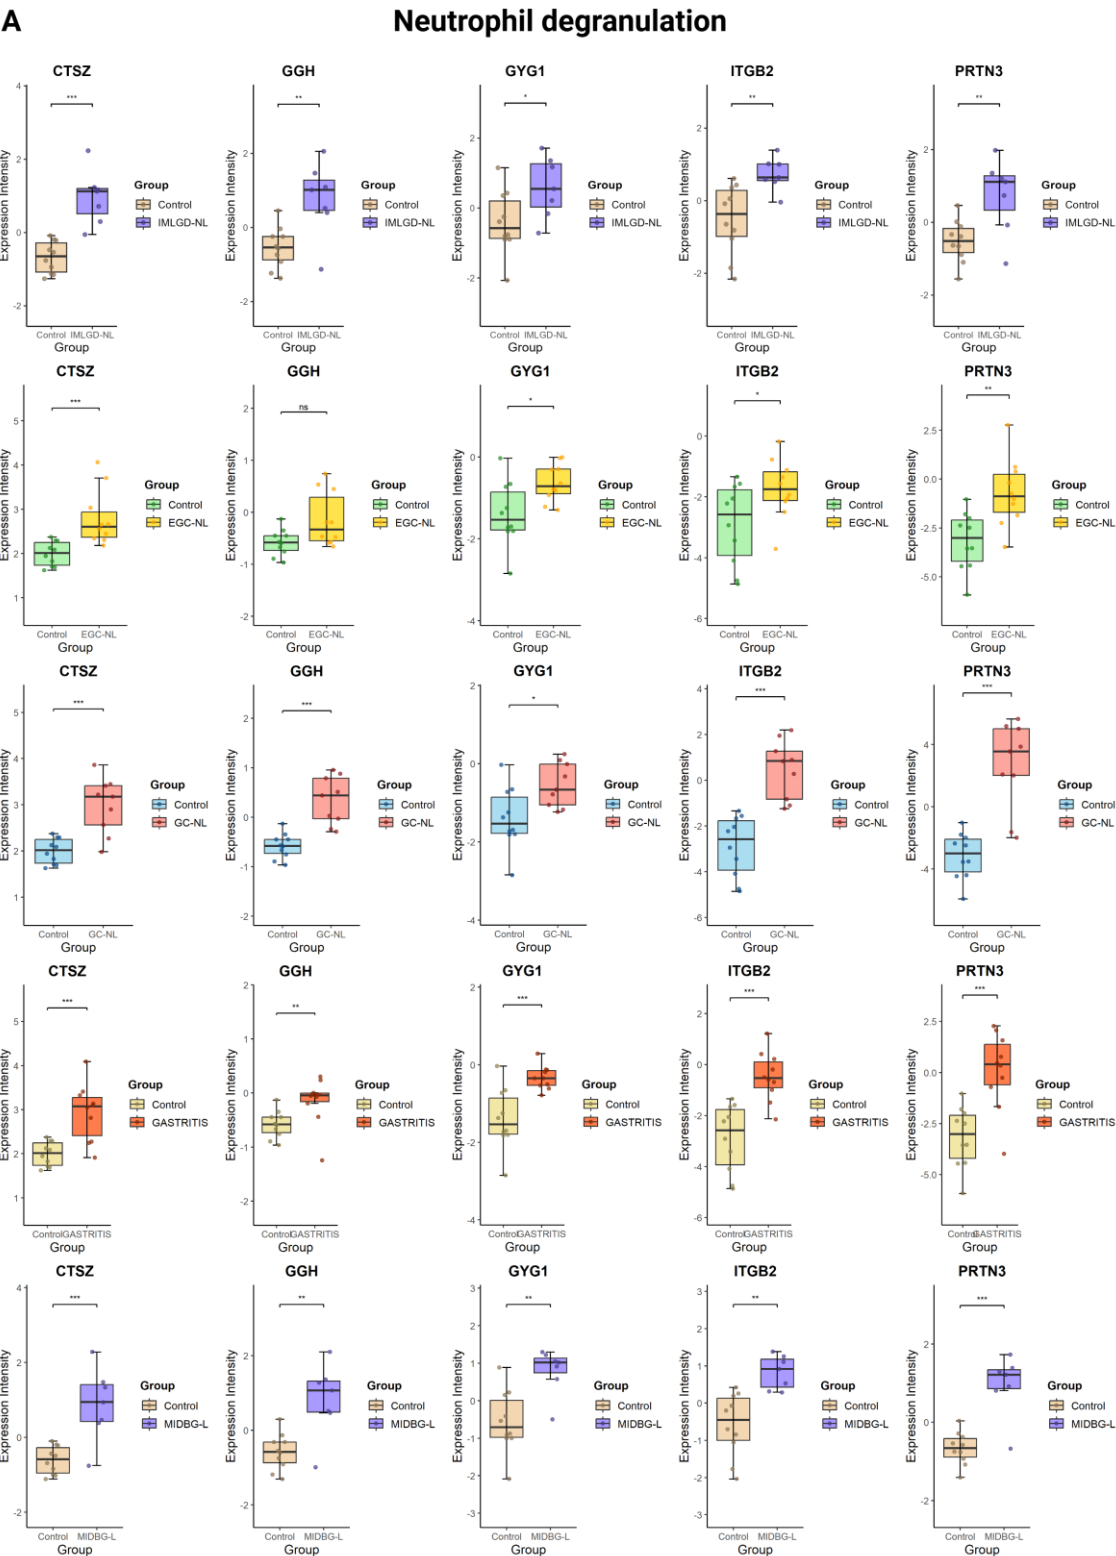

A

Neutrophil degranulation

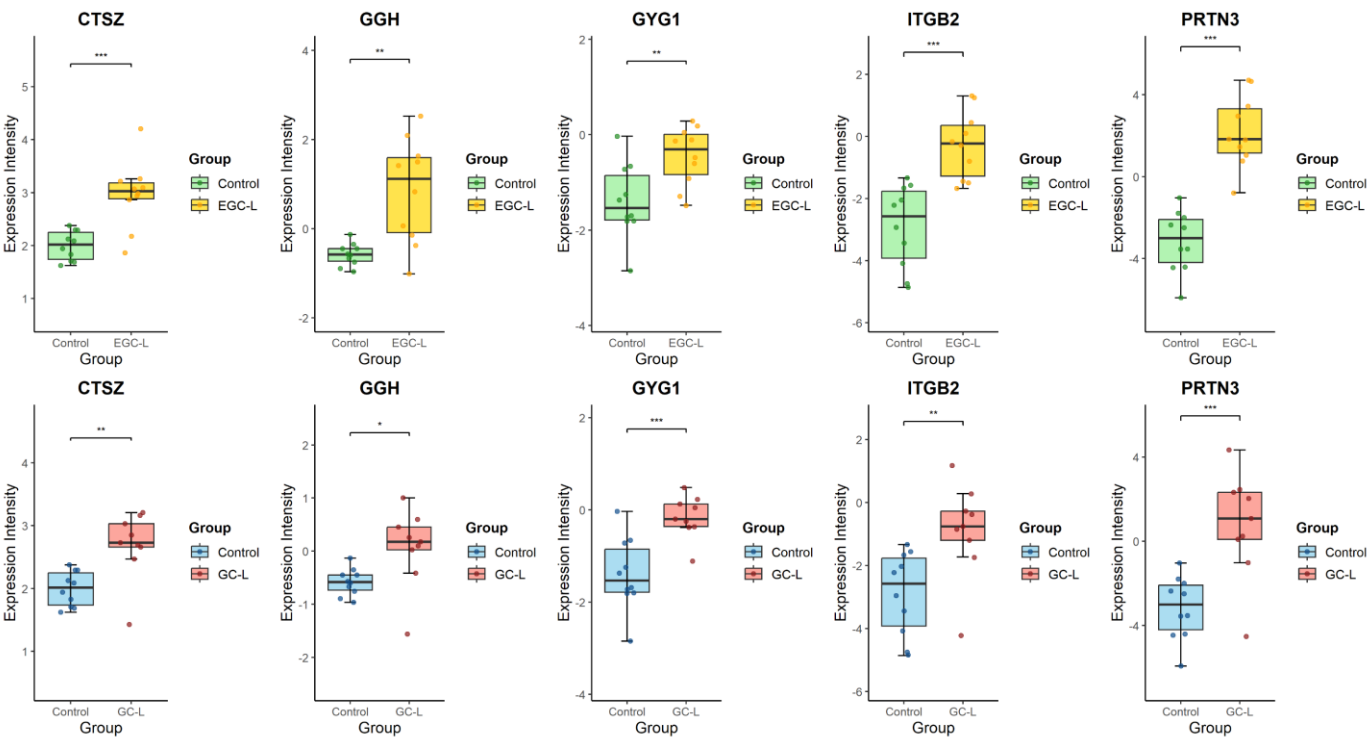

Figure S8.

Neutrophil degranulation

A

EGC-L GC-L GC-NL

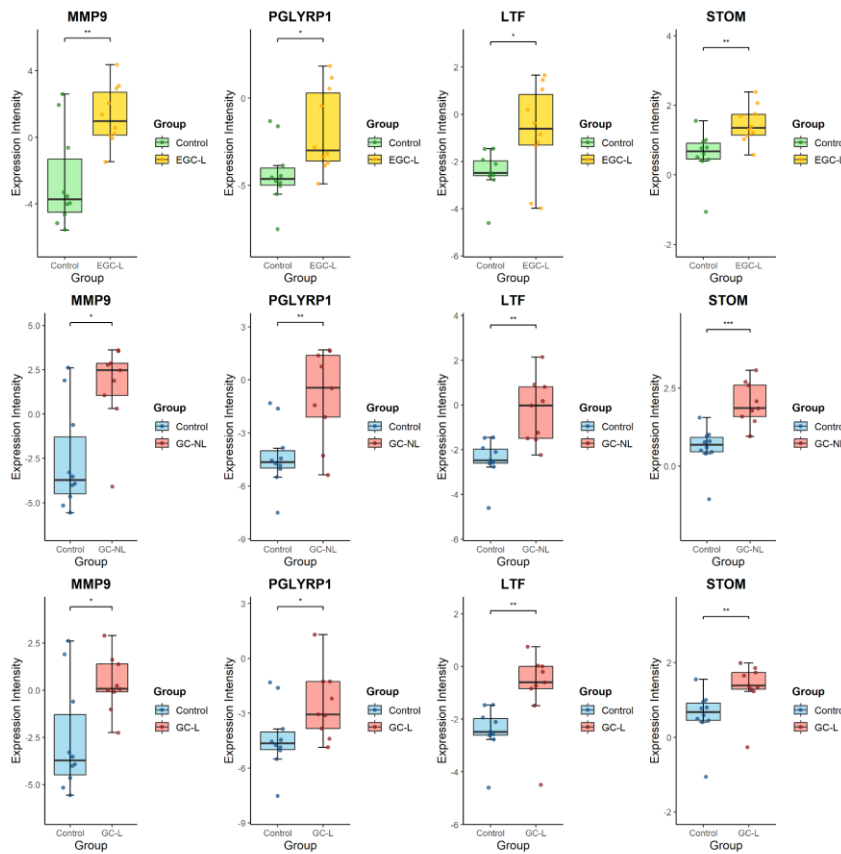

B

EGC-L MI-DBG-L

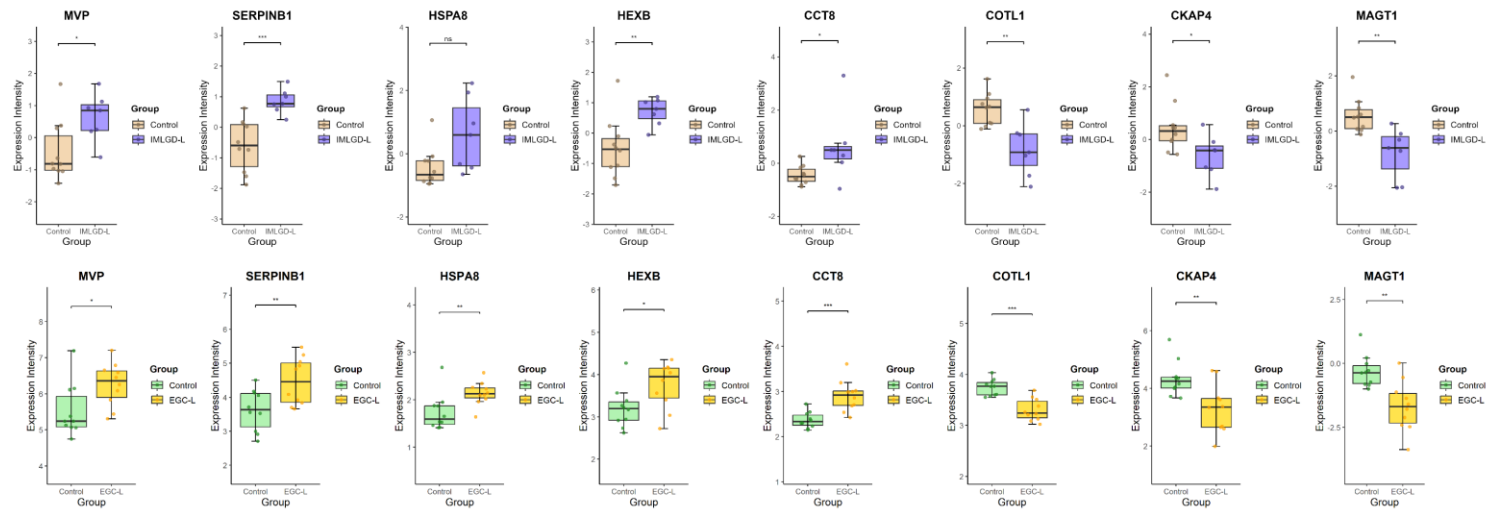

Supplement: Supplementary file 1 [file 0d1dde538c933c8d4c3be4ff.pdf]
