# Supplementary material for: Mass spectrometry-based proteomics to study gastric carcinogenesis: pathophysiological molecular characterization
Source: Research Square preprint supplement (doi:10.21203/rs.3.rs-7685514/v1), 2025-10-23

## **Uncropped Gels and Blots images for**

### **Mass spectrometry-based proteomics to study gastric carcinogenesis: pathophysiological molecular characterization.**

Nayra Felípez <sup>1</sup>, Sheyla Montori <sup>1</sup>, Alba Valero <sup>1</sup>, Enrique Santamaría <sup>2</sup>, Karina Ausin <sup>2</sup>, Erika Peral <sup>2</sup>, Joan Llach <sup>3,4</sup>, Pedro Delgado <sup>5</sup>, Pablo Florez-Diez <sup>6</sup>, Eva Barreiro <sup>6</sup>, Elena Arruebo <sup>7</sup>, Raquel Vicente <sup>7</sup>, M Teresa Soria <sup>7</sup>, Alain Huerta <sup>8</sup>, Silvia Patricia Ortega <sup>9</sup>, Henar Núñez <sup>10</sup>, Pilar Díez <sup>10</sup>, Alberto Herreros <sup>11</sup>, Gadea Hontoria <sup>12</sup>, Rosa María Saíz <sup>12</sup>, Luis Hernández <sup>13</sup>, Carolina Mangas-Sanjuan <sup>13</sup>, Oliver Patrón <sup>14</sup>, Gonzalo Hijos-Mallada <sup>15</sup>, María José Domper <sup>15</sup>, Sara Zarraquiños <sup>16</sup>, Astrid Irene Díez-Martín <sup>16</sup>, Patricia Gonçalves <sup>17</sup>, Diego de Frutos <sup>11</sup>, José Santiago <sup>11</sup>, Adelina García <sup>18</sup>, Alicia Martín-Lagos <sup>18</sup>, Fermín Estremera-Arévalo <sup>19</sup>, Marta Gómez Alonso <sup>19</sup>, Anabella Cuestas <sup>3,4</sup>, Francesc Balaguer <sup>3,4</sup>, Sergi Castellví-Bel <sup>3,4</sup>, Glòria Fernandez-Esparrach <sup>3,4</sup>, Miriam Cuatrecasas <sup>20</sup>, Leticia Moreira <sup>3,4</sup>, Joaquín Fernández-Irigoyen <sup>2</sup>, Eduardo Albéniz <sup>19</sup>, EpiGASTRIC EDGAR Consortium.

**Gel images for Figure 4E-F.**

**Upper image showing the loading of controls, chronic gastritis (CG), early gastric cancer (adjacent = NL, lesional = L EGC), as well as intestinal gastric cancer (adjacent = NL, lesional = L IGC).**

**Middle image showing the loading of controls and intestinal metaplasia-low grade dysplasia (adjacent = NL, lesional = L IM-LGD).**

**The lower image showing the loading of controls, early gastric cancer (adjacent = NL, lesional = L EGC), as well as diffuse gastric cancer (adjacent = NL, lesional = L DGC).**

**Equal loading of the gels was assessed using stain-free imaging technology.**

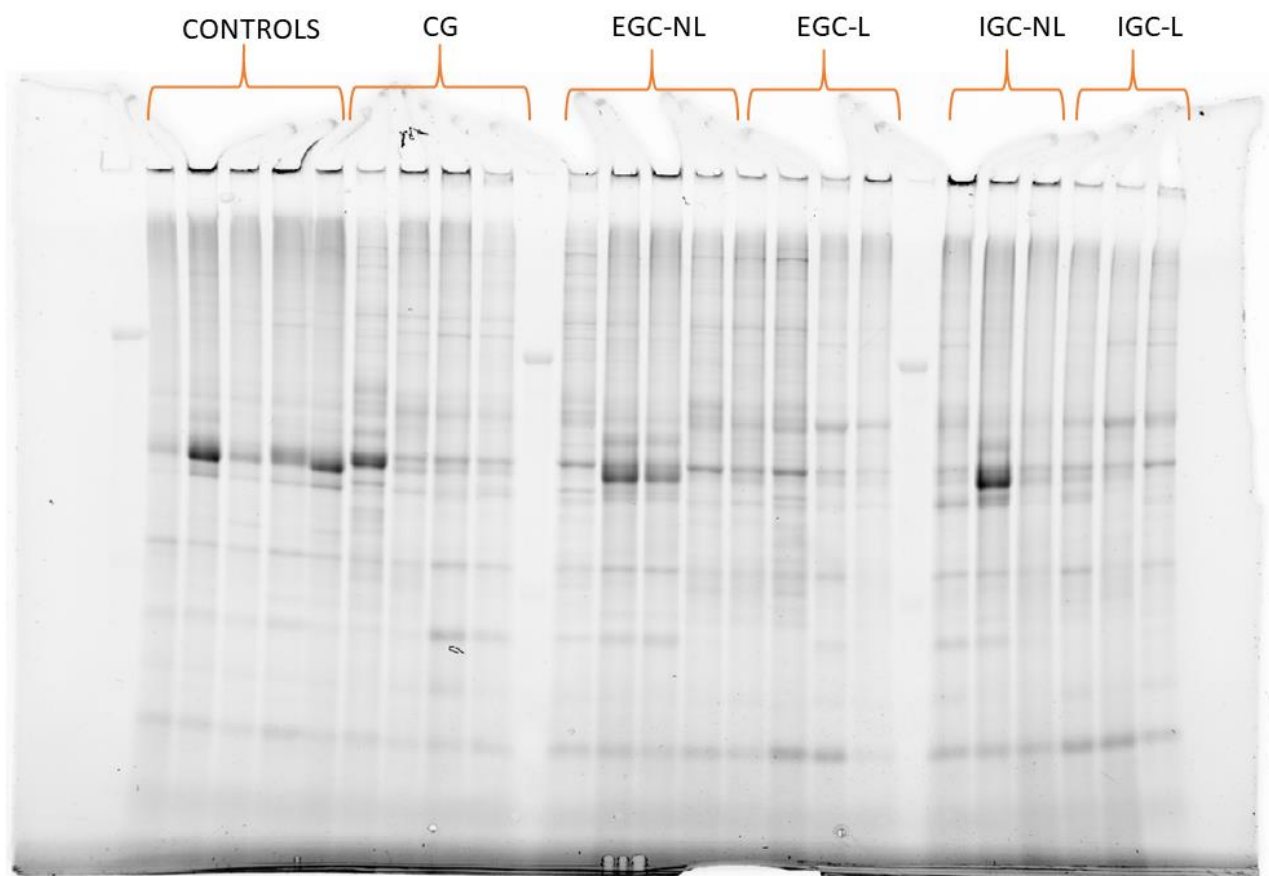

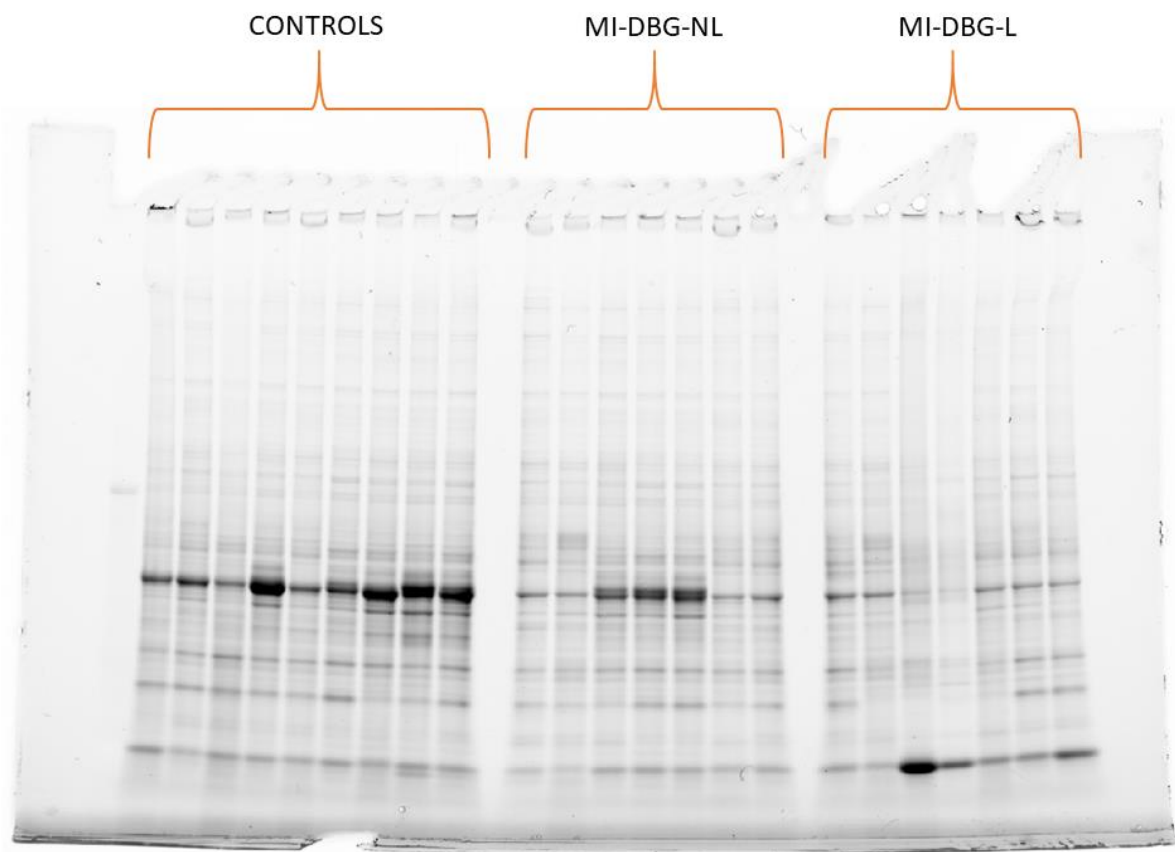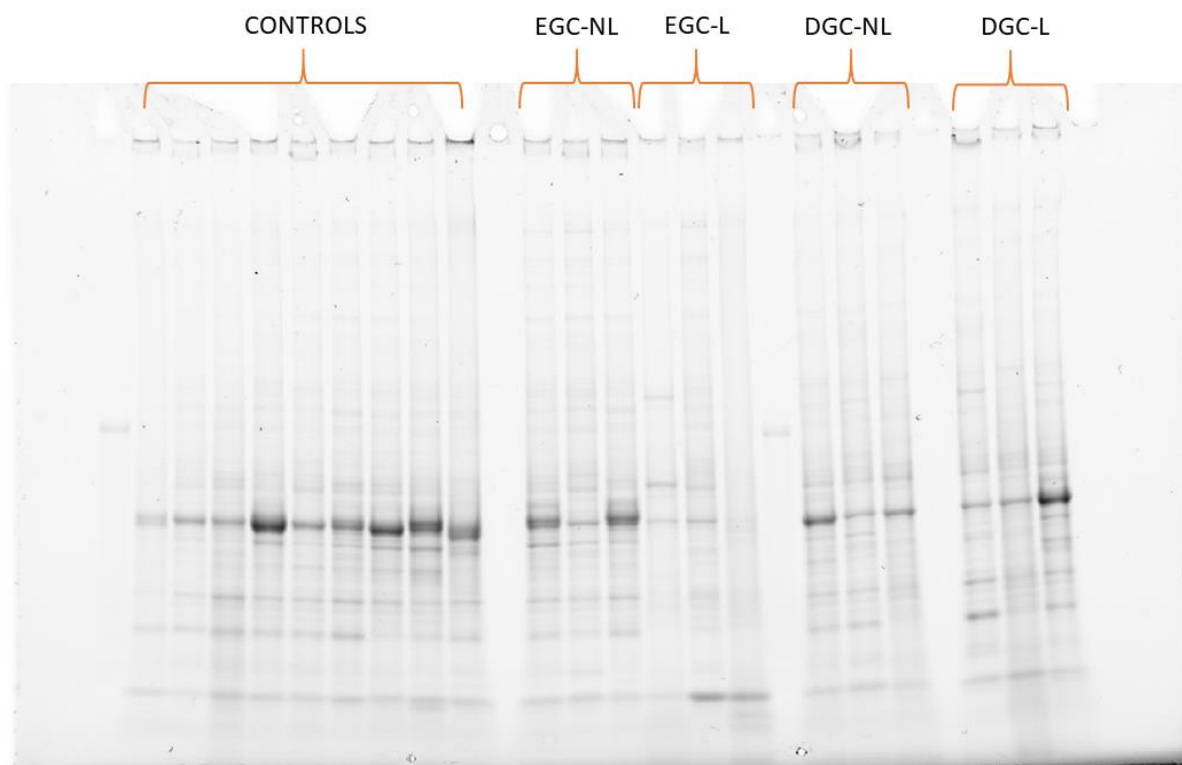

Western blot images for Figure 4E-F.

Red arrows highlight the cropped images presented on figure 4E-F.

Molecular weight for the protein ladder showed on the left.

Both NF-Kb and pNF-kB were detected on the same gel (membrane).

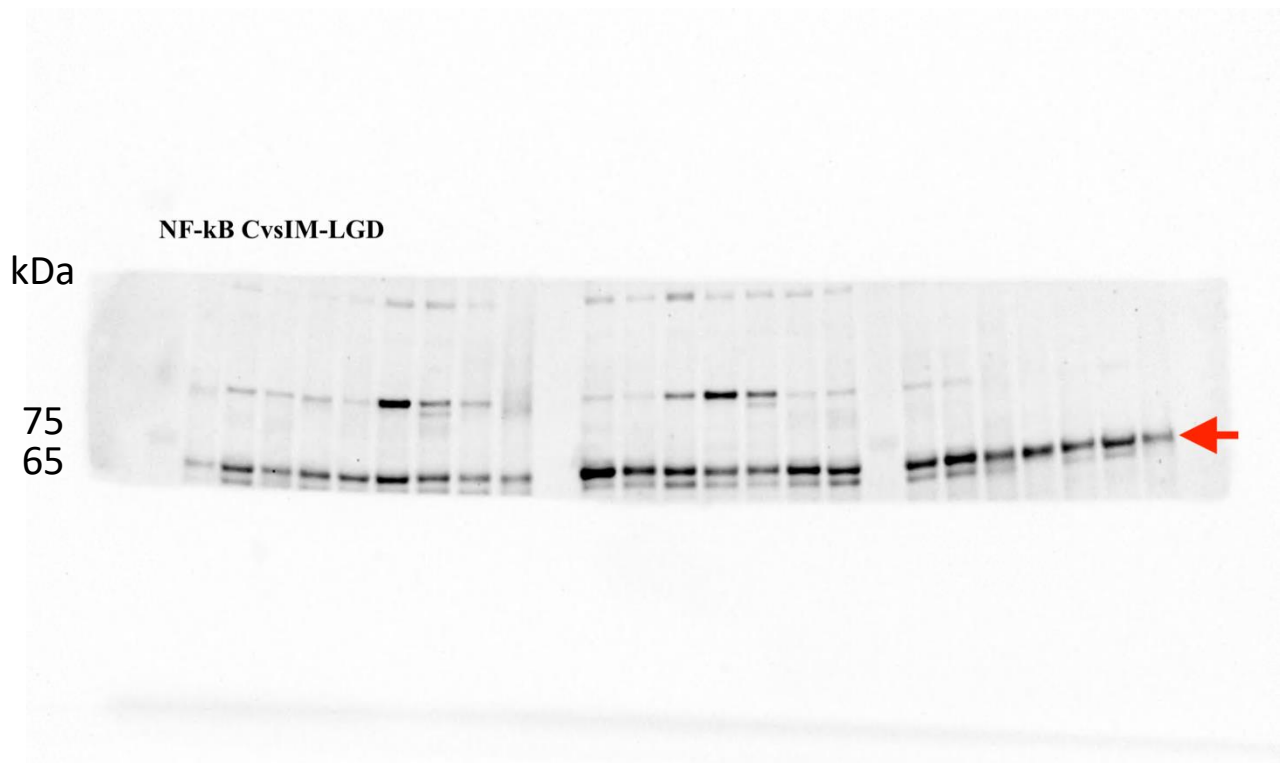

NF-kB CvsDGC

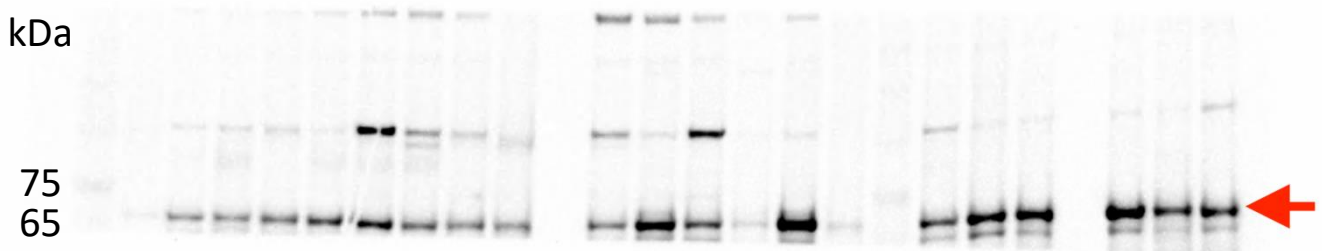

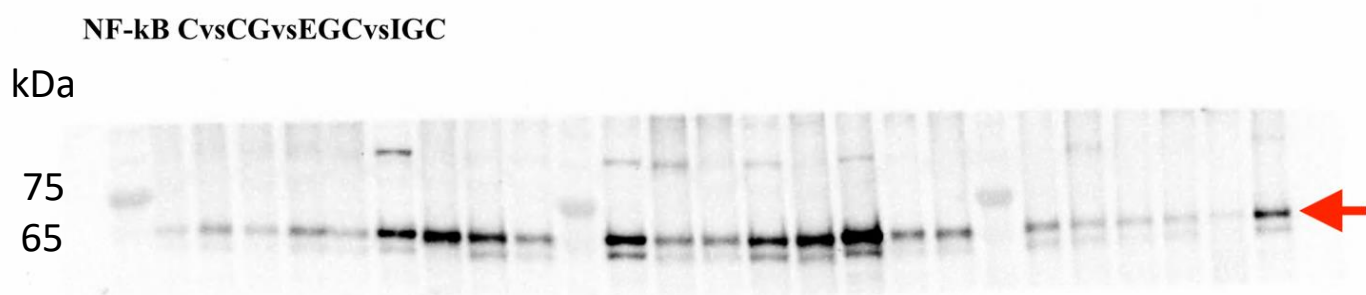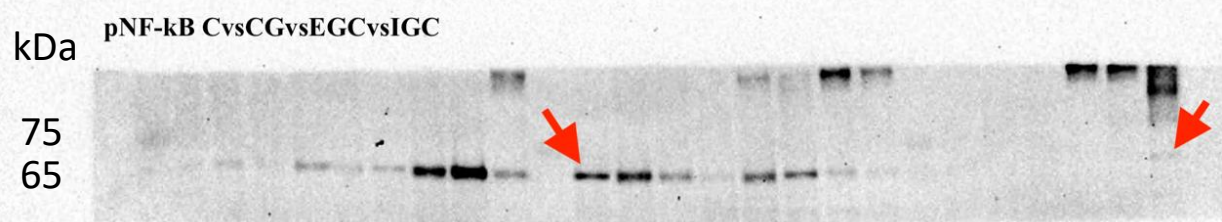

pNF-kB CvsIM-LGD

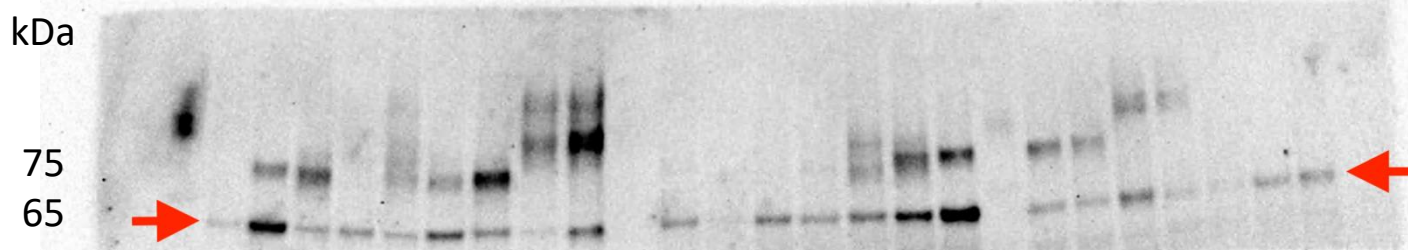

pNF-kB CvsDGC

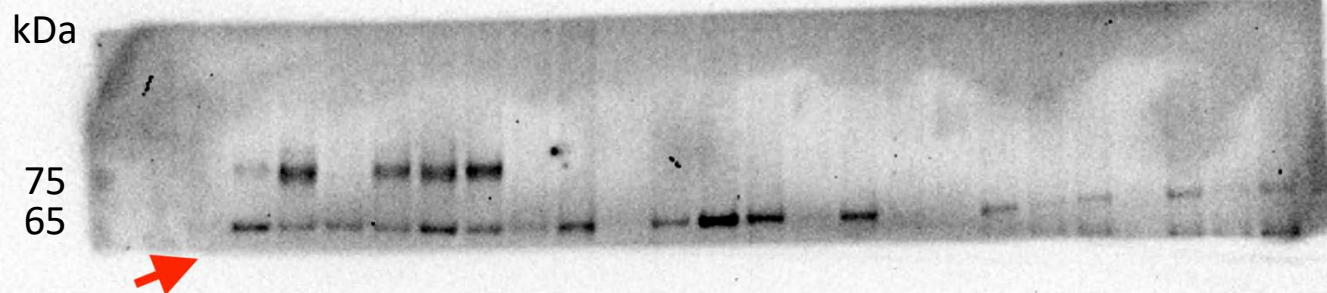



## Gel images for Figure 4G-H

Upper image showing the loading of controls and chronic gastritis (CG).

Second image showing the loading of controls and intestinal metaplasia-low grade dysplasia (adjacent = NL, lesional = L IM-LGD).

Third image showing the loading of controls, early gastric cancer (adjacent = NL, lesional = L EGC), as well as diffuse gastric cancer (adjacent = NL, lesional = L DGC).

The lower image showing the loading of controls, early gastric cancer (adjacent = NL, lesional = L EGC), as well as intestinal gastric cancer (adjacent = NL, lesional = L IGC).

Equal loading of the gels was assessed using stain-free imaging technology.

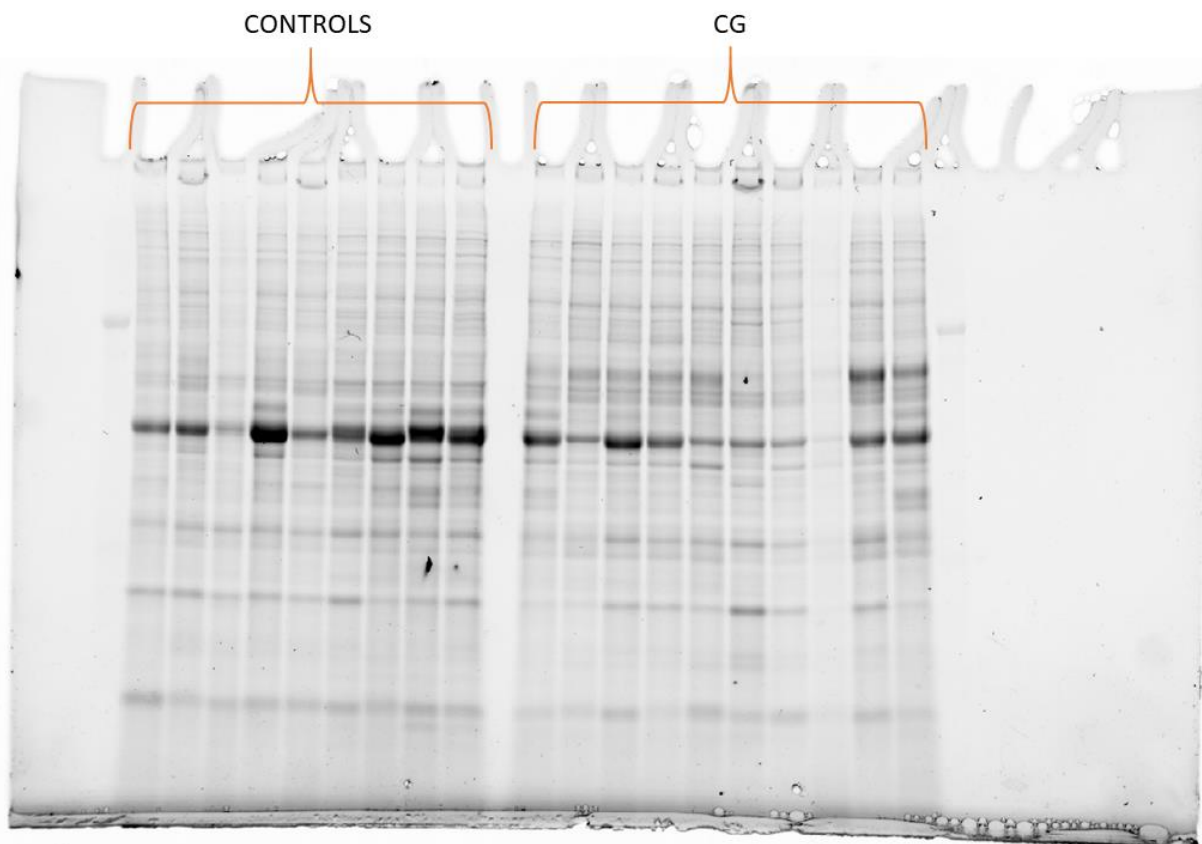

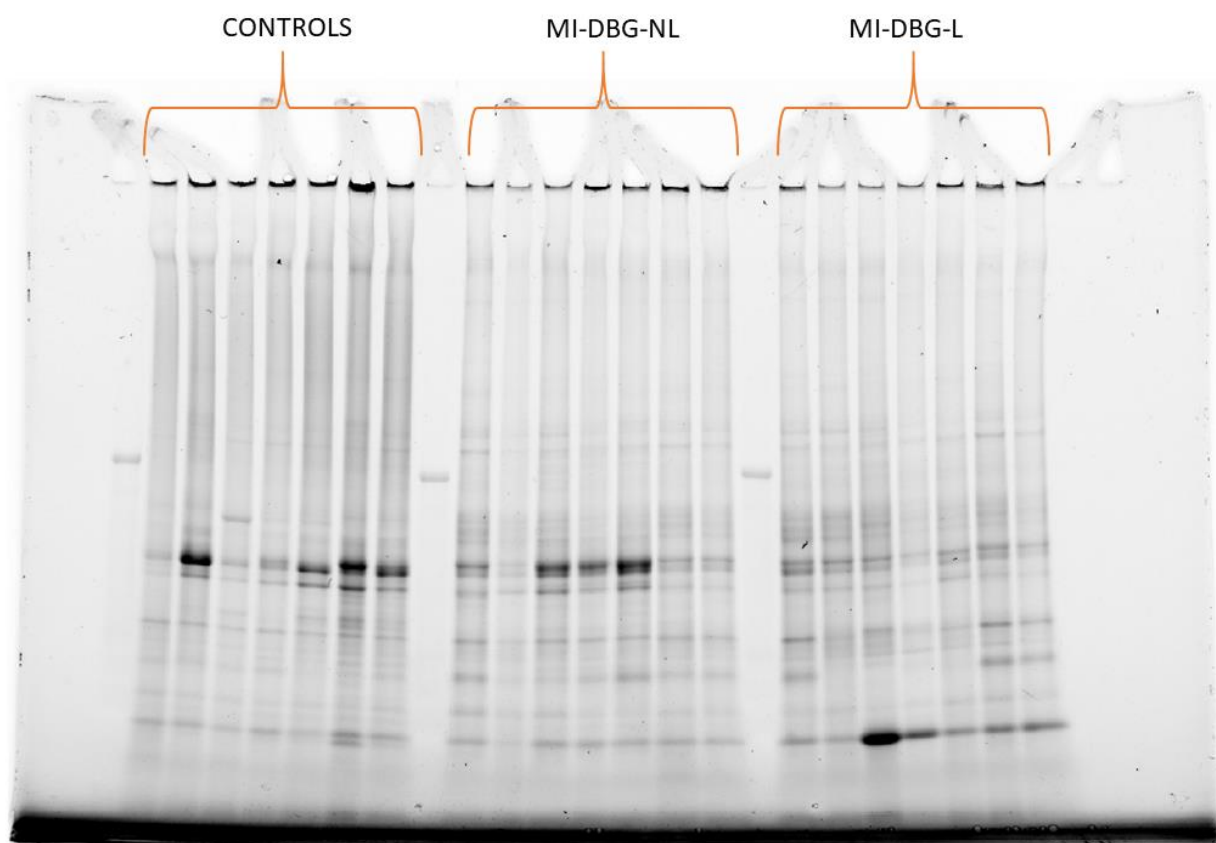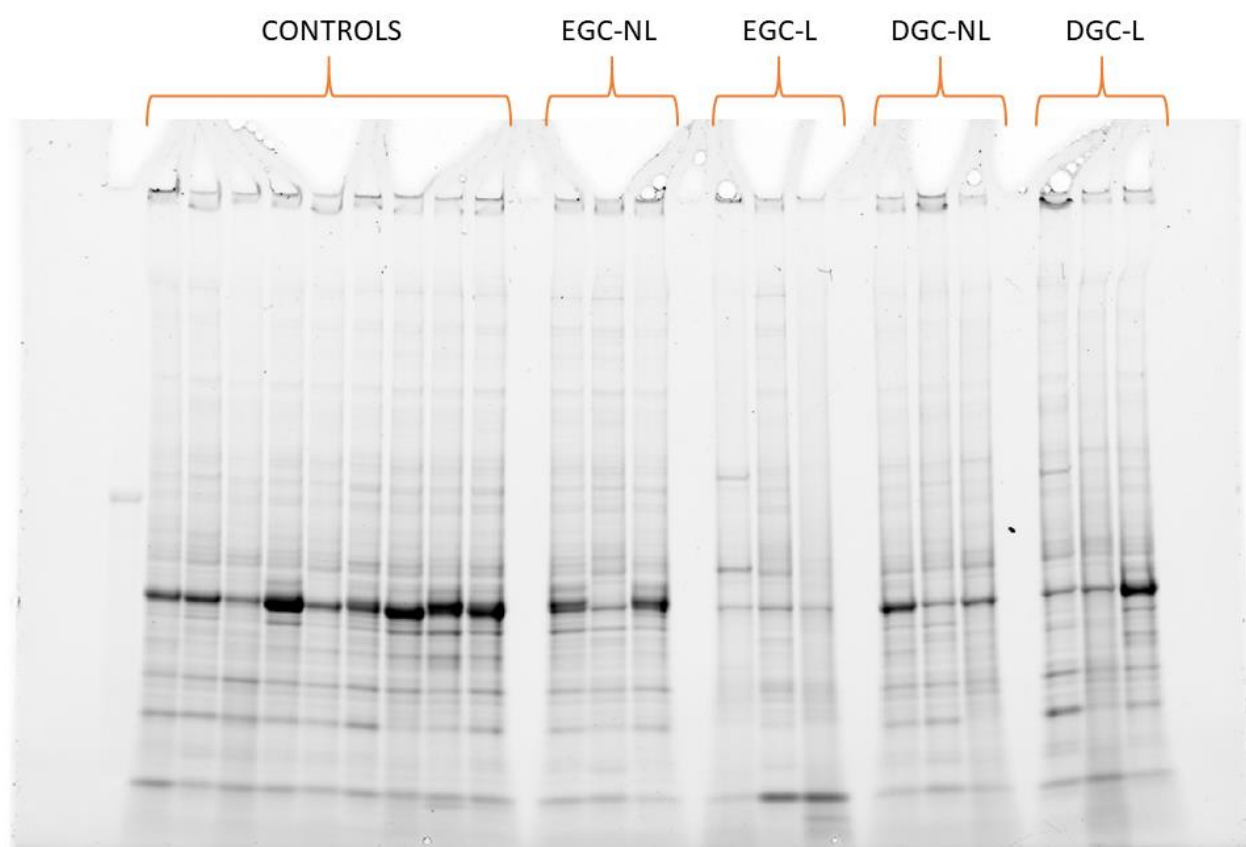



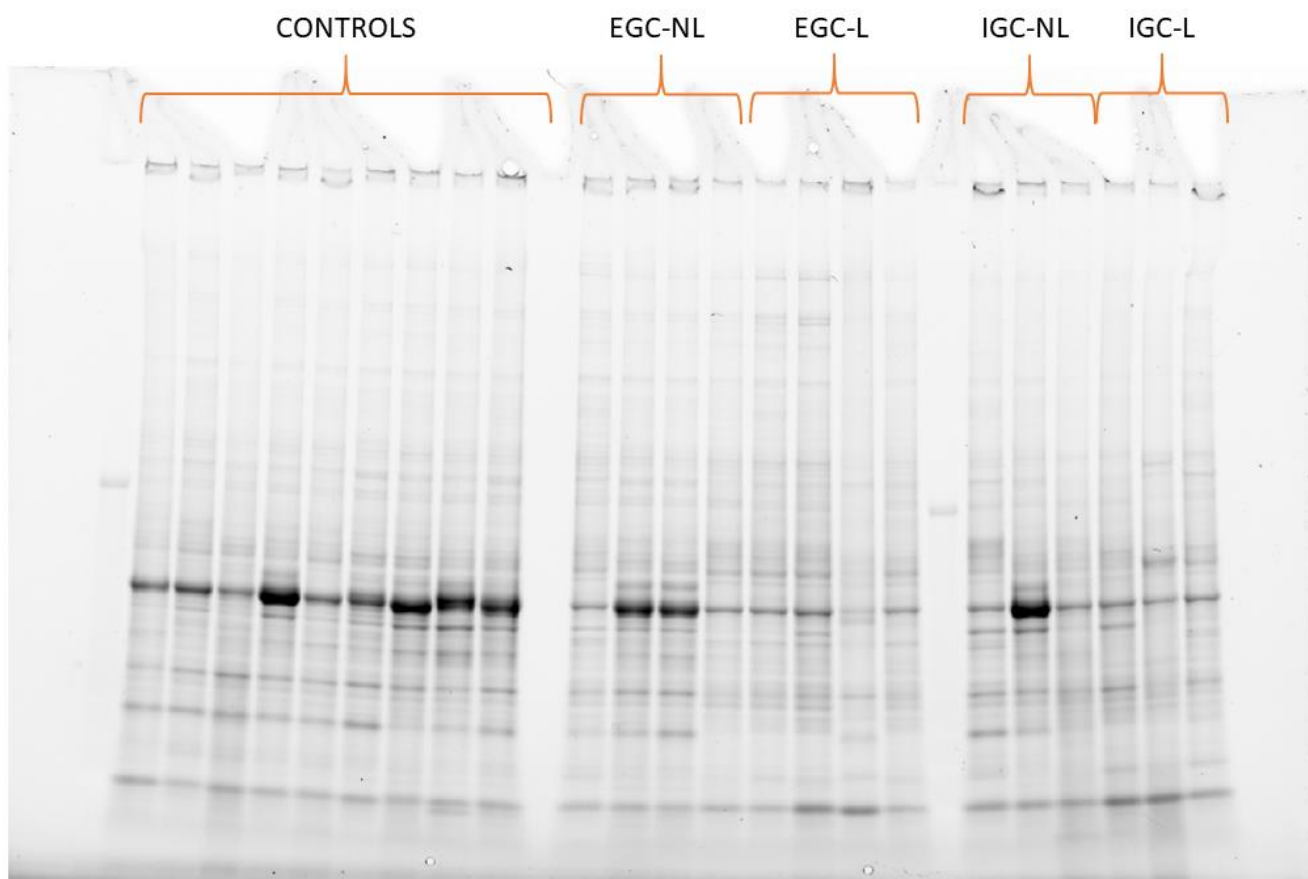

Western blot images for Figure 4G-H.

Red arrows highlight the cropped images presented on figure 4G-H.

Molecular weight for the protein ladder showed on the left.

Both pp38 and p38 were detected on the same gel (membrane).

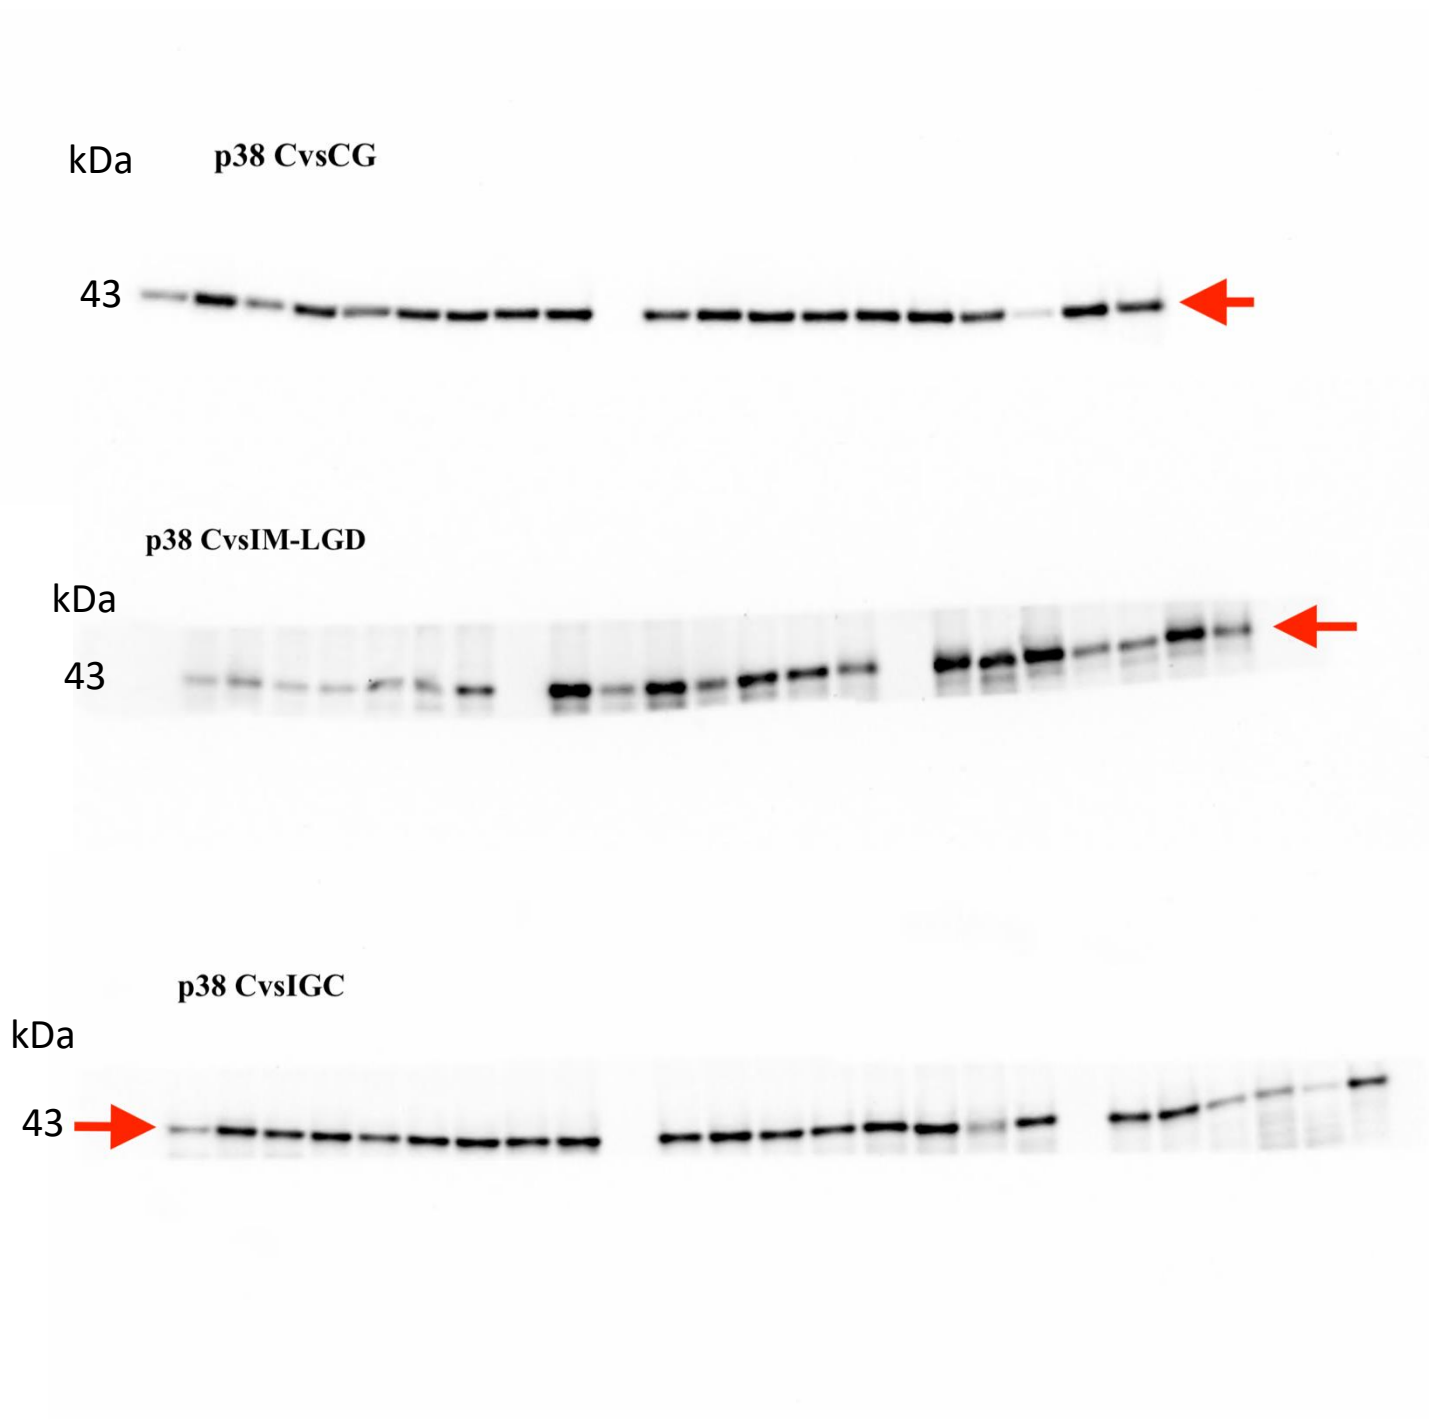

kDa p38 CvsDGC

43

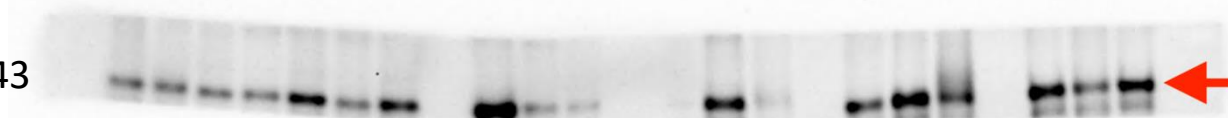

kDa pp38 CvsCG

43

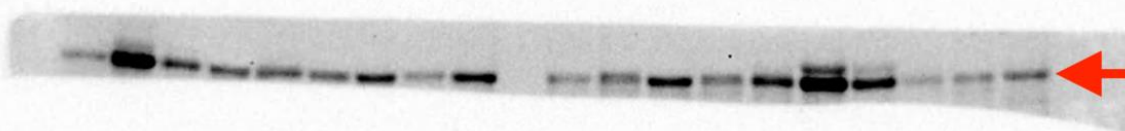

kDa pp38 CvsIM-LGD

43

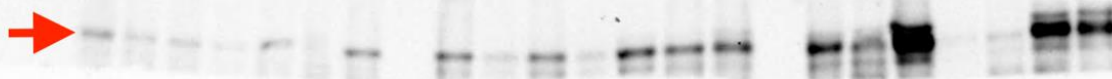

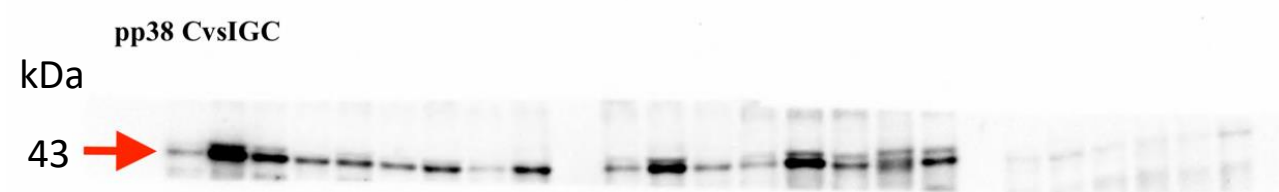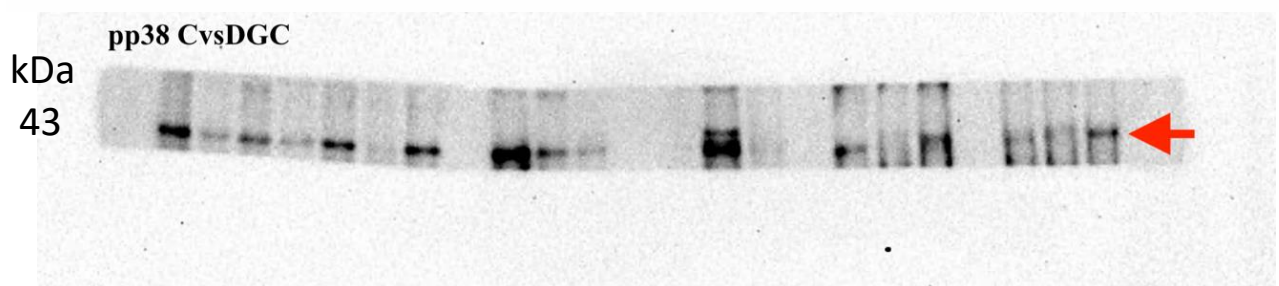

Supplement: Supplementary file 2 [file a3d7134cafd99f5fcdbfc4c9.pdf]
