# Supplementary material for: Mass spectrometry-based proteomics to study gastric carcinogenesis: pathophysiological molecular characterization
Source: Research Square preprint supplement (doi:10.21203/rs.3.rs-7685514/v1), 2025-10-23
Supplement: Supplementary file 1 [file 98dfca9a065f375202a7a973.xlsx]

## Sheet: Contents
Supplementary Table Legend
Table S1. Antibody dilutions, human gastric tissue samples that were used in this study, and patients information. (IM-LGD = intestinal metaplasia-low grade dysplasia, EGC = early gastric cancer, and GC = gastric cancer).

## Sheet: Antibodies
Antibodies	Product number	Distributor	Dilution
anti-p38 MAPK phospho	9211	Cell signaling	1/1000
anti-p38 MAPK	9212	Cell signaling	1/1000
anti-NF-κB p65 phospho (Ser536) (93H1)	3033S	Cell signaling	1/1000
anti-NF-κB p65 (D14E12) XP®	8242	Cell signaling	1/1000

## Sheet: GT L-NL cohort
Cohort	Cases	Sex	Age	H.pylory	Country of birth	Alcohol	Smoking	Weight	Height	Diagnosis
Control	E1-19	Female	49	Negative	Spain	Drinker	Ex-smoker	59	157	Normal
Control	E1-20	Male	77	Negative	Spain	Drinker	Ex-smoker	86	173	Normal
Control	E1-34	Female	53	Negative	Spain	Drinker	Non-smoker	57	161	Normal
Control	E1-41	Female	61	Negative	Spain	Drinker	Ex-smoker	83	150	Normal
Control	E1-63	Male	50	Negative	Spain	Drinker	Non-smoker	68	175	Normal
Control	E1-66	Male	50	Negative	United States	Drinker	Non-smoker	75	184	Normal
Control	E1-71	Female	69	Negative	Spain	Drinker	Ex-smoker	57	155	Normal
Control	E1-79	Male	58	Negative	Spain	Drinker	Smoker	72	172	Normal
Control	E1-80	Male	59	Negative	Spain	Drinker	Ex-smoker	75	167	Normal
Control	E1-82	Female	55	Negative	Spain	Non-Drinker	Ex-smoker	64	163	Normal
Gastritits	E1-14	Female	37	Positive	Spain	Drinker	Non-smoker	48	156	Chronic Gastritis
Gastritits	E1-15	Male	68	Positive	Spain	Drinker	Ex-smoker	80	169	Chronic Gastritis
Gastritits	E1-30	Male	52	Positive	Spain	Drinker	Non-smoker	76	177	Chronic Gastritis
Gastritits	E1-39	Female	68	Positive	Spain	Drinker	Ex-smoker	53	155	Chronic Gastritis
Gastritits	E1-43	Male	26	Positive	Portugal	Drinker	Smoker	63	169	Chronic Gastritis
Gastritits	E1-44	Female	72	Negative	Spain	Drinker	Ex-smoker	62	153	Chronic Gastritis
Gastritits	E1-56	Male	68	Negative	Spain	Drinker	Ex-smoker	95	180	Chronic Gastritis
Gastritits	E1-64	Male	54	Negative	Spain	Drinker	Non-smoker	100	168	Chronic Gastritis
Gastritits	E1-70	Female	52	Positive	Spain	Drinker	Ex-smoker	64	159	Chronic Gastritis
Gastritits	E1-89	Female	51	Positive	Spain	Non-Drinker	Non-smoker	64	170	Chronic Gastritis
IM-LGD	E1-11	Female	65	Negative	Belarus	Drinker	Non-smoker	70	171	Incomplete Intestinal Metaplasia + Chronic Gastritis	x2
IM-LGD	E1-17	Female	82	Positive	Spain	Non-Drinker	Non-smoker	50	148	Complete Intestinal Metaplasia + Chronic Gastritis	x2
IM-LGD	HCB-3	Male	78	Negative	Spain	Drinker	Smoker	63	173	Low Grade Dysplasia	x2
IM-LGD	HCB-4	Female	70	Negative	Spain	Non-Drinker	Non-smoker	78	155	Low Grade Dysplasia	x2
IM-LGD	HUN-1	Male	70	Negative	Spain	Drinker	Smoker	84	172	Low Grade Dysplasia	x2
IM-LGD	HUN-4	Female	74	Negative	Portugal	Non-Drinker	Non-smoker	62	175	Low Grade Dysplasia	x2
IM-LGD	HUN-8	Male	51	Negative	Moldavia	Drinker	Non-smoker	87	171	Low Grade Dysplasia	x2
EGC	HUN-3	Male	79	Negative	Spain	Drinker	Smoker	61	168	Intramucosal Gastric Cancer	x2
EGC	HUN-5	Female	88	Negative	Spain	Drinker	Non-smoker	68	161	Intramucosal Gastric Cancer	x2
EGC	HUN-6	Female	68	No data	Spain	Non-Drinker	Non-smoker	60	157	Intramucosal Gastric Cancer	x2
EGC	HUN-11	Female	74	Negative	Spain	Drinker	Ex-smoker	74	149	High Grade Dysplasia	x2
EGC	HUN-14	Female	89	Negative	Spain	Drinker	Non-smoker	.	145	Intramucosal Gastric Cancer	x2
EGC	HUN-15	Male	73	No data	Spain	Drinker	Ex-smoker	69	170	Intramucosal Gastric Cancer	x2
EGC	HUN-16	Female	80	Negative	Spain	Non-Drinker	Non-smoker	73	165	Intramucosal Gastric Cancer	x2
EGC	HUN-23	Female	49	No data	Spain	Non-Drinker	Non-smoker	47	159	Intramucosal Gastric Cancer	x2
EGC	HCB-1	Female	89	Negative	Spain	Non-Drinker	Non-smoker	47	162	Intramucosal Gastric Cancer	x2
EGC	HCB-2	Female	77	Positive	Peru	Non-Drinker	Non-smoker	64	157	Intramucosal Gastric Cancer	x2
GC	HCB-2	Female	36	No data	Ecuador	Drinker	Smoker	67	166	Difusse Gastric Cancer	x2
GC	HCB-21	Female	45	No data	Spain	Drinker	Smoker	42	163	Difusse Gastric Cancer	x2
GC	HCB-25	Female	62	No data	Ecuador	Drinker	Non-smoker	68	155	Difusse Gastric Cancer	x2
GC	HCB-33	Male	80	No data	Spain	Drinker	Ex-smoker	68	167	Difusse Gastric Cancer	x2
GC	HCB-34	Male	74	No data	Spain	Drinker	Ex-smoker	82	175	Difusse Gastric Cancer	x2
GC	HCB-3	Male	56	No data	Spain	Non-Drinker	Ex-smoker	73	180	Intestinal Gastric Cancer	x2
GC	HCB-13	Male	55	No data	Spain	Non-Drinker	Non-smoker	60	170	Intestinal Gastric Cancer	x2
GC	HCB-15	Female	77	No data	Peru	Non-Drinker	Non-smoker	75	150	Intestinal Gastric Cancer	x2
GC	HCB-18	Female	94	No data	Spain	Non-Drinker	Non-smoker	65	163	Intestinal Gastric Cancer	x2
										Total patients	46
										Total tissue samples (both lesional and non-lesional	72
