# Supplementary material for: Mass spectrometry-based proteomics to study gastric carcinogenesis: pathophysiological molecular characterization
Source: Research Square preprint supplement (doi:10.21203/rs.3.rs-7685514/v1), 2025-10-23
Supplement: Supplementary file 2 [file d175e2c9d6aa3cd7399625fb.xlsx]

## Sheet: Contents
Supplementary Table Legend
Table S3. Metascape enrichment pathways. Common and unique dysregulated pathways across all cohorts (lesional and non-lesional tissue). Unpaired/paired t-test for equal variances with/without Welch correction, or Wilcoxon rank-sum test. *p < 0.05; **p < 0.01, ***p < 0.001 vs. control group and between groups (CG = chronic gastritis, IM-LGD = intestinal metaplasia-low grade dysplasia, EGC = early …

## Sheet: Enrich pathways
Category	CategoryID	GO	GeneList	Description	LogP	Enrichment	Z-score	#TotalGeneInLibrary	#GeneInGO	#GeneInHitList	#GeneInGOAndHitList	%InGO	STDV %InGO	GeneID	Hits	Log(q-value)
Reactome Gene Sets	6	R-HSA-5619084	IM-LGD-L	ABC transporter disorders	-2.3	3.1	3.4	30286	78	1012	8	0.79	0.28	335|5687|5692|5696|5699|5710|5721|11160	APOA1|PSMA6|PSMB4|PSMB8|PSMB10|PSMD4|PSME2|ERLIN2	-1.9
Reactome Gene Sets	6	R-HSA-382556	EGC-L	ABC-family proteins mediated transport	-2.1	2.4	2.9	30286	103	1217	10	0.82	0.26	335|1968|5696|5699|5704|5710|5721|8894|10613|11160	APOA1|EIF2S3|PSMB8|PSMB10|PSMC4|PSMD4|PSME2|EIF2S2|ERLIN1|ERLIN2	-1.7
Reactome Gene Sets	6	R-HSA-167242	IM-LGD-L	Abortive elongation of HIV-1 transcript in the absence of Tat	-2.2	5.2	3.8	30286	23	1012	4	0.4	0.2	2962|2963|5434|6829	GTF2F1|GTF2F2|POLR2E|SUPT5H	-1.8
Reactome Gene Sets	6	R-HSA-167242	GC-NL	Abortive elongation of HIV-1 transcript in the absence of Tat	-2.1	4.9	3.6	30286	23	1076	4	0.37	0.19	2962|2963|5434|25920	GTF2F1|GTF2F2|POLR2E|NELFB	-1.4
Reactome Gene Sets	6	R-HSA-399997	IM-LGD-L	Acetylcholine regulates insulin secretion	-2.4	9	4.7	30286	10	1012	3	0.3	0.17	2776|4082|5331	GNAQ|MARCKS|PLCB3	-2
Reactome Gene Sets	6	R-HSA-399997	EGC-L	Acetylcholine regulates insulin secretion	-2.2	7.5	4.2	30286	10	1217	3	0.25	0.14	2767|2776|5331	GNA11|GNAQ|PLCB3	-1.8
Reactome Gene Sets	6	R-HSA-176814	GASTRITIS	Activation of APC/C and APC/C:Cdc20 mediated degradation of mitotic proteins	-2	3.3	3.1	30286	76	724	6	0.83	0.34	983|5694|5695|5696|5699|5721	CDK1|PSMB6|PSMB7|PSMB8|PSMB10|PSME2	-1.7
Reactome Gene Sets	6	R-HSA-176187	EGC-L	Activation of ATR in response to replication stress	-4	5.4	5.5	30286	37	1217	8	0.66	0.23	4171|4173|4174|4175|5982|5984|6117|6119	MCM2|MCM4|MCM5|MCM6|RFC2|RFC4|RPA1|RPA3	-3.3
Reactome Gene Sets	6	R-HSA-176187	IM-LGD-L	Activation of ATR in response to replication stress	-2.9	4.9	4.4	30286	37	1012	6	0.59	0.24	4171|4173|4174|4175|5982|6118	MCM2|MCM4|MCM5|MCM6|RFC2|RPA2	-2.4
Reactome Gene Sets	6	R-HSA-176187	GC-NL	Activation of ATR in response to replication stress	-2.7	4.6	4.2	30286	37	1076	6	0.56	0.23	4171|4173|4174|4175|5982|5984	MCM2|MCM4|MCM5|MCM6|RFC2|RFC4	-1.9
Reactome Gene Sets	6	R-HSA-174577	IM-LGD-L	Activation of C3 and C5	-4.1	15	7.3	30286	8	1012	4	0.4	0.2	629|718|721|5199	CFB|C3|C4B|CFP	-3.3
Reactome Gene Sets	6	R-HSA-174577	GC-NL	Activation of C3 and C5	-2.7	11	5.2	30286	8	1076	3	0.28	0.16	629|718|5199	CFB|C3|CFP	-1.8
Reactome Gene Sets	6	R-HSA-174577	EGC-L	Activation of C3 and C5	-2.5	9.3	4.8	30286	8	1217	3	0.25	0.14	629|718|5199	CFB|C3|CFP	-2.1
Reactome Gene Sets	6	R-HSA-451326	EGC-L	Activation of kainate receptors upon glutamate binding	-2.1	3.9	3.3	30286	32	1217	5	0.41	0.18	1741|2788|5331|54331|55970	DLG3|GNG7|PLCB3|GNG2|GNG12	-1.7
Reactome Gene Sets	6	R-HSA-1169091	GC-L	Activation of NF-kappaB in B cells	-3	6.7	5	30286	67	336	5	1.5	0.66	4794|5696|5699|5721|8517	NFKBIE|PSMB8|PSMB10|PSME2|IKBKG	-2.5
Reactome Gene Sets	6	R-HSA-1169091	GASTRITIS	Activation of NF-kappaB in B cells	-2.3	3.7	3.5	30286	67	724	6	0.83	0.34	5694|5695|5696|5699|5721|8517	PSMB6|PSMB7|PSMB8|PSMB10|PSME2|IKBKG	-1.9
Reactome Gene Sets	6	R-HSA-1169091	IM-LGD-L	Activation of NF-kappaB in B cells	-2.8	3.6	3.9	30286	67	1012	8	0.79	0.28	4790|4794|5687|5692|5696|5699|5710|5721	NFKB1|NFKBIE|PSMA6|PSMB4|PSMB8|PSMB10|PSMD4|PSME2	-2.3
Reactome Gene Sets	6	R-HSA-72662	GC-NL	Activation of the mRNA upon binding of the cap-binding complex and eIFs, and subsequent binding to 43S	-2.3	3.3	3.4	30286	60	1076	7	0.65	0.25	1964|2197|6193|6209|6210|6233|6235	EIF1AX|FAU|RPS5|RPS15|RPS15A|RPS27A|RPS29	-1.5
Reactome Gene Sets	6	R-HSA-68962	IM-LGD-L	Activation of the pre-replicative complex	-2.3	4.5	3.8	30286	33	1012	5	0.49	0.22	4171|4173|4174|4175|6118	MCM2|MCM4|MCM5|MCM6|RPA2	-1.9
Reactome Gene Sets	6	R-HSA-68962	GC-NL	Activation of the pre-replicative complex	-2.2	4.3	3.6	30286	33	1076	5	0.46	0.21	4171|4173|4174|4175|54107	MCM2|MCM4|MCM5|MCM6|POLE3	-1.5
Reactome Gene Sets	6	R-HSA-68962	EGC-L	Activation of the pre-replicative complex	-3.5	5.3	5	30286	33	1217	7	0.58	0.22	4171|4173|4174|4175|6117|6119|54107	MCM2|MCM4|MCM5|MCM6|RPA1|RPA3|POLE3	-2.9
Reactome Gene Sets	6	R-HSA-1280218	GASTRITIS	Adaptive Immune System	-10	2.8	7.8	30286	768	724	51	7	0.95	811|829|929|1075|1174|1445|1508|1512|1514|1536|2923|3093|3106|3115|3122|3123|3146|3309|3383|3385|3689|3937|4012|4067|4360|5336|5532|5641|5694|5695|5696|5699|5721|5777|5788|6279|6456|6494|6890|6892|7318|7529|8139|8517|10053|10484|30011|51752|57674|84617|151636	CALR|CAPZA1|CD14|CTSC|AP1S1|CSK|CTSB|CTSH|CTSL|CYBB|PDIA3|UBE2K|HLA-B|HLA-DPB1|HLA-DRA|HLA-DRB1|HMGB1|HSPA5|ICAM1|ICAM3|ITGB2|LCP2|LNPEP|LYN|MRC1|PLCG2|PPP3CB|LGMN|PSMB6|PSMB7|PSMB8|PSMB10|PSME2|PTPN6|PTPRC|S100A8|SH3GL2|SIPA1|TAP1|TAPBP|UBA7|YWHAB|GAN|IKBKG|AP1M2|SEC23A|SH3KBP1|ERAP1|RNF213|TUBB6|DTX3L	-8.7
Reactome Gene Sets	6	R-HSA-1280218	GC-L	Adaptive Immune System	-6.2	3.1	6.1	30286	768	336	26	7.7	1.5	1075|1174|1508|3106|3115|3122|3385|3689|3937|4012|4794|5641|5696|5699|5721|5777|6279|6456|6892|7323|8139|8517|10053|30011|55336|151636	CTSC|AP1S1|CTSB|HLA-B|HLA-DPB1|HLA-DRA|ICAM3|ITGB2|LCP2|LNPEP|NFKBIE|LGMN|PSMB8|PSMB10|PSME2|PTPN6|S100A8|SH3GL2|TAPBP|UBE2D3|GAN|IKBKG|AP1M2|SH3KBP1|FBXL8|DTX3L	-5.2
Reactome Gene Sets	6	R-HSA-1280218	EGC-L	Adaptive Immune System	-8.2	2.1	6.5	30286	768	1217	66	5.4	0.65	164|718|829|929|1075|1173|1174|1277|1445|1508|1510|1512|1514|1536|1783|2243|2244|2475|3093|3106|3122|3123|3146|3383|3385|3689|3937|4067|4794|5062|5493|5696|5699|5704|5710|5721|5777|5788|5817|6279|6280|6494|6786|6923|7064|7323|7408|7534|9354|9554|10053|10120|10121|10134|10382|10952|23480|25831|30011|55336|55658|55860|79876|81027|84617|151636	AP1G1|C3|CAPZA1|CD14|CTSC|AP2M1|AP1S1|COL1A1|CSK|CTSB|CTSE|CTSH|CTSL|CYBB|DYNC1LI2|FGA|FGB|MTOR|UBE2K|HLA-B|HLA-DRA|HLA-DRB1|HMGB1|ICAM1|ICAM3|ITGB2|LCP2|LYN|NFKBIE|PAK2|PPL|PSMB8|PSMB10|PSMC4|PSMD4|PSME2|PTPN6|PTPRC|PVR|S100A8|S100A9|SIPA1|STIM1|ELOB|THOP1|UBE2D3|VASP|YWHAZ|UBE4A|SEC22B|AP1M2|ACTR1B|ACTR1A|BCAP31|TUBB4A|SEC61B|SEC61G|HECTD1|SH3KBP1|FBXL8|RNF126|ACTR10|UBA5|TUBB1|TUBB6|DTX3L	-6.9
Reactome Gene Sets	6	R-HSA-1280218	GC-NL	Adaptive Immune System	-6.4	2.1	5.7	30286	768	1076	56	5.2	0.68	164|718|929|1075|1173|1174|1213|1445|1508|1510|1514|1536|1783|2243|2244|3093|3106|3115|3122|3127|3383|3385|3685|3689|3937|4067|5062|5289|5336|5493|5695|5704|5777|5788|6233|6279|6280|6494|6786|6892|7064|7454|7525|8517|8673|9902|10053|10120|10121|10484|25831|30011|55336|55860|84617|151636	AP1G1|C3|CD14|CTSC|AP2M1|AP1S1|CLTC|CSK|CTSB|CTSE|CTSL|CYBB|DYNC1LI2|FGA|FGB|UBE2K|HLA-B|HLA-DPB1|HLA-DRA|HLA-DRB5|ICAM1|ICAM3|ITGAV|ITGB2|LCP2|LYN|PAK2|PIK3C3|PLCG2|PPL|PSMB7|PSMC4|PTPN6|PTPRC|RPS27A|S100A8|S100A9|SIPA1|STIM1|TAPBP|THOP1|WAS|YES1|IKBKG|VAMP8|MRC2|AP1M2|ACTR1B|ACTR1A|SEC23A|HECTD1|SH3KBP1|FBXL8|ACTR10|TUBB6|DTX3L	-4.9
Reactome Gene Sets	6	R-HSA-1280218	IM-LGD-L	Adaptive Immune System	-3.9	1.8	4.1	30286	768	1012	46	4.5	0.65	164|718|811|1075|1174|1445|1508|2243|2244|2475|3106|3115|3122|3385|3689|4012|4067|4790|4794|4893|5641|5687|5692|5696|5699|5710|5721|5777|5788|6279|6786|7454|9554|9871|10484|10802|10952|23480|30011|55658|55905|63893|64837|79654|79876|151636	AP1G1|C3|CALR|CTSC|AP1S1|CSK|CTSB|FGA|FGB|MTOR|HLA-B|HLA-DPB1|HLA-DRA|ICAM3|ITGB2|LNPEP|LYN|NFKB1|NFKBIE|NRAS|LGMN|PSMA6|PSMB4|PSMB8|PSMB10|PSMD4|PSME2|PTPN6|PTPRC|S100A8|STIM1|WAS|SEC22B|SEC24D|SEC23A|SEC24A|SEC61B|SEC61G|SH3KBP1|RNF126|RNF114|UBE2O|KLC2|HECTD3|UBA5|DTX3L	-3.2
Reactome Gene Sets	6	R-HSA-1280218	IM-LGD-NL	Adaptive Immune System	-2.6	2.1	3.3	30286	768	333	18	5.4	1.2	1075|1174|1445|1508|1536|3115|3122|3133|3689|5336|5777|5788|6279|6810|7454|10053|10484|81027	CTSC|AP1S1|CSK|CTSB|CYBB|HLA-DPB1|HLA-DRA|HLA-E|ITGB2|PLCG2|PTPN6|PTPRC|S100A8|STX4|WAS|AP1M2|SEC23A|TUBB1	-1.8
Reactome Gene Sets	6	R-HSA-1280218	EGC-NL	Adaptive Immune System	-3	3.3	4	30286	768	120	10	8.3	2.5	929|1174|1510|3115|3122|3385|3689|3937|9902|26232	CD14|AP1S1|CTSE|HLA-DPB1|HLA-DRA|ICAM3|ITGB2|LCP2|MRC2|FBXO2	-2.1
Reactome Gene Sets	6	R-HSA-418592	EGC-L	ADP signalling through P2Y purinoceptor 1	-2.5	5	4.1	30286	25	1217	5	0.41	0.18	2767|2776|2788|54331|55970	GNA11|GNAQ|GNG7|GNG2|GNG12	-2.1
Reactome Gene Sets	6	R-HSA-418592	IM-LGD-NL	ADP signalling through P2Y purinoceptor 1	-2.6	11	5.2	30286	25	333	3	0.9	0.52	2767|2776|55970	GNA11|GNAQ|GNG12	-1.7
Reactome Gene Sets	6	R-HSA-879415	GASTRITIS	Advanced glycosylation endproduct receptor signaling	-2.5	9.7	4.9	30286	13	724	3	0.41	0.24	829|3146|6283	CAPZA1|HMGB1|S100A12	-2.1
Reactome Gene Sets	6	R-HSA-1428517	GASTRITIS	Aerobic respiration and respiratory electron transport	-67	15	32	30286	215	724	76	10	1.1	38|50|506|513|514|515|522|539|1327|1329|1345|1350|1431|1537|1737|1743|2108|2109|2110|2271|2805|2806|3029|3418|3945|4191|4509|4513|4697|4698|4700|4701|4702|4704|4705|4707|4709|4713|4714|4715|4716|4718|4720|4722|4723|4724|4725|4726|4728|4729|5162|6341|6390|6834|7381|7384|7385|7386|7388|7416|8801|8802|8803|9167|9377|10128|10632|23530|25874|27089|27109|51204|80219|81889|92259|126328	ACAT1|ACO2|ATP5F1B|ATP5F1D|ATP5F1E|ATP5PB|ATP5PF|ATP5PO|COX4I1|COX5B|COX6C|COX7C|CS|CYC1|DLAT|DLST|ETFA|ETFB|ETFDH|FH|GOT1|GOT2|HAGH|IDH2|LDHB|MDH2|ATP8|COX2|NDUFA4|NDUFA5|NDUFA6|NDUFA7|NDUFA8|NDUFA9|NDUFA10|NDUFB1|NDUFB3|NDUFB7|NDUFB8|NDUFB9|NDUFB10|NDUFC2|NDUFS2|NDUFS3|NDUFV1|NDUFS4|NDUFS5|NDUFS6|NDUFS8|NDUFV2|PDHB|SCO1|SDHB|SURF1|UQCRB|UQCRC1|UQCRC2|UQCRFS1|UQCRH|VDAC1|SUCLG2|SUCLG1|SUCLA2|COX…	-64
Reactome Gene Sets	6	R-HSA-1428517	GC-L	Aerobic respiration and respiratory electron transport	-15	9.6	13	30286	215	336	23	6.8	1.4	515|1327|1345|1350|1537|4190|4509|4513|4698|4704|4709|4712|4714|4718|4720|4722|6341|6834|7386|7416|23530|25874|27089	ATP5PB|COX4I1|COX6C|COX7C|CYC1|MDH1|ATP8|COX2|NDUFA5|NDUFA9|NDUFB3|NDUFB6|NDUFB8|NDUFC2|NDUFS2|NDUFS3|SCO1|SURF1|UQCRFS1|VDAC1|NNT|MPC2|UQCRQ	-14
Reactome Gene Sets	6	R-HSA-1428517	IM-LGD-NL	Aerobic respiration and respiratory electron transport	-30	15	21	30286	215	333	35	11	1.7	1327|1345|4200|4513|4700|4701|4702|4704|4707|4709|4714|4715|4716|4720|4722|4723|4724|4725|4726|4729|4731|7381|7384|7385|7386|7388|7416|9377|23530|27089|27109|28976|81889|122961|126328	COX4I1|COX6C|ME2|COX2|NDUFA6|NDUFA7|NDUFA8|NDUFA9|NDUFB1|NDUFB3|NDUFB8|NDUFB9|NDUFB10|NDUFS2|NDUFS3|NDUFV1|NDUFS4|NDUFS5|NDUFS6|NDUFV2|NDUFV3|UQCRB|UQCRC1|UQCRC2|UQCRFS1|UQCRH|VDAC1|COX5A|NNT|UQCRQ|DMAC2L|ACAD9|FAHD1|ISCA2|NDUFA11	-27
Reactome Gene Sets	6	R-HSA-1428517	IM-LGD-L	Aerobic respiration and respiratory electron transport	-74	13	32	30286	215	1012	90	8.9	0.89	38|50|506|513|514|515|521|522|539|1327|1329|1337|1340|1345|1350|1431|1537|1737|1743|2108|2109|2110|2271|2805|2806|3418|3945|4190|4191|4509|4513|4694|4695|4697|4698|4700|4701|4702|4704|4705|4707|4709|4712|4713|4714|4715|4716|4718|4720|4722|4723|4724|4725|4726|4728|4729|5091|6341|6390|6834|7381|7384|7385|7386|7388|7416|8402|8801|8802|8803|9167|9377|9997|10128|10632|23530|25874|27089|27109|28976|512…	ACAT1|ACO2|ATP5F1B|ATP5F1D|ATP5F1E|ATP5PB|ATP5ME|ATP5PF|ATP5PO|COX4I1|COX5B|COX6A1|COX6B1|COX6C|COX7C|CS|CYC1|DLAT|DLST|ETFA|ETFB|ETFDH|FH|GOT1|GOT2|IDH2|LDHB|MDH1|MDH2|ATP8|COX2|NDUFA1|NDUFA2|NDUFA4|NDUFA5|NDUFA6|NDUFA7|NDUFA8|NDUFA9|NDUFA10|NDUFB1|NDUFB3|NDUFB6|NDUFB7|NDUFB8|NDUFB9|NDUFB10|NDUFC2|NDUFS2|NDUFS3|NDUFV1|NDUFS4|NDUFS5|NDUFS6|NDUFS8|NDUFV2|PC|SCO1|SDHB|SURF1|UQCRB|UQCRC1|UQCRC2|UQCR…	-71
Reactome Gene Sets	6	R-HSA-1428517	GC-NL	Aerobic respiration and respiratory electron transport	-77	12	32	30286	215	1076	94	8.7	0.86	38|50|506|513|514|515|521|522|539|1327|1329|1340|1345|1350|1431|1537|1737|1743|2108|2109|2110|2271|2805|2806|3029|3418|3419|3945|4190|4191|4200|4509|4513|4694|4695|4697|4698|4700|4701|4702|4704|4705|4707|4709|4713|4714|4715|4716|4718|4720|4722|4723|4724|4725|4726|4728|4729|5091|5162|6233|6341|6390|6834|7381|7384|7385|7386|7388|7416|8402|8801|8802|8803|9167|9377|9997|10632|10873|23530|25874|27089|…	ACAT1|ACO2|ATP5F1B|ATP5F1D|ATP5F1E|ATP5PB|ATP5ME|ATP5PF|ATP5PO|COX4I1|COX5B|COX6B1|COX6C|COX7C|CS|CYC1|DLAT|DLST|ETFA|ETFB|ETFDH|FH|GOT1|GOT2|HAGH|IDH2|IDH3A|LDHB|MDH1|MDH2|ME2|ATP8|COX2|NDUFA1|NDUFA2|NDUFA4|NDUFA5|NDUFA6|NDUFA7|NDUFA8|NDUFA9|NDUFA10|NDUFB1|NDUFB3|NDUFB7|NDUFB8|NDUFB9|NDUFB10|NDUFC2|NDUFS2|NDUFS3|NDUFV1|NDUFS4|NDUFS5|NDUFS6|NDUFS8|NDUFV2|PC|PDHB|RPS27A|SCO1|SDHB|SURF1|UQCRB|UQCRC…	-74
Reactome Gene Sets	6	R-HSA-1428517	EGC-L	Aerobic respiration and respiratory electron transport	-67	10	28	30286	215	1217	90	7.4	0.75	38|50|506|513|514|515|521|522|539|1327|1329|1340|1345|1350|1431|1537|1737|1743|2108|2109|2110|2271|2805|2806|2875|3029|3418|3945|4190|4200|4509|4513|4694|4695|4697|4698|4700|4701|4702|4704|4705|4707|4709|4712|4713|4714|4715|4716|4718|4720|4722|4723|4724|4725|4726|4728|4729|4731|5091|5162|5165|6341|6390|6834|7381|7384|7385|7386|7388|7416|8402|8801|8802|8803|9167|9377|9997|10632|10873|23530|25874|2…	ACAT1|ACO2|ATP5F1B|ATP5F1D|ATP5F1E|ATP5PB|ATP5ME|ATP5PF|ATP5PO|COX4I1|COX5B|COX6B1|COX6C|COX7C|CS|CYC1|DLAT|DLST|ETFA|ETFB|ETFDH|FH|GOT1|GOT2|GPT|HAGH|IDH2|LDHB|MDH1|ME2|ATP8|COX2|NDUFA1|NDUFA2|NDUFA4|NDUFA5|NDUFA6|NDUFA7|NDUFA8|NDUFA9|NDUFA10|NDUFB1|NDUFB3|NDUFB6|NDUFB7|NDUFB8|NDUFB9|NDUFB10|NDUFC2|NDUFS2|NDUFS3|NDUFV1|NDUFS4|NDUFS5|NDUFS6|NDUFS8|NDUFV2|NDUFV3|PC|PDHB|PDK3|SCO1|SDHB|SURF1|UQCRB|…	-64
Reactome Gene Sets	6	R-HSA-5423646	GC-L	Aflatoxin activation and detoxification	-4.3	19	8.3	30286	19	336	4	1.2	0.59	4257|4258|4259|22977	MGST1|MGST2|MGST3|AKR7A3	-3.5
Reactome Gene Sets	6	R-HSA-5423646	IM-LGD-L	Aflatoxin activation and detoxification	-2.5	6.3	4.3	30286	19	1012	4	0.4	0.2	4257|4259|22977|91703	MGST1|MGST3|AKR7A3|ACY3	-2.1
Reactome Gene Sets	6	R-HSA-5423646	EGC-L	Aflatoxin activation and detoxification	-2.2	5.2	3.8	30286	19	1217	4	0.33	0.16	4257|4258|4259|22977	MGST1|MGST2|MGST3|AKR7A3	-1.8
Reactome Gene Sets	6	R-HSA-9646399	EGC-L	Aggrephagy	-2.1	3.5	3.3	30286	43	1217	6	0.49	0.2	1783|3320|7431|10382|81027|84617	DYNC1LI2|HSP90AA1|VIM|TUBB4A|TUBB1|TUBB6	-1.8
Reactome Gene Sets	6	R-HSA-173736	IM-LGD-L	Alternative complement activation	-3.5	18	7.1	30286	5	1012	3	0.3	0.17	629|718|5199	CFB|C3|CFP	-2.8
Reactome Gene Sets	6	R-HSA-173736	GC-NL	Alternative complement activation	-3.4	17	6.8	30286	5	1076	3	0.28	0.16	629|718|5199	CFB|C3|CFP	-2.3
Reactome Gene Sets	6	R-HSA-173736	EGC-L	Alternative complement activation	-3.2	15	6.4	30286	5	1217	3	0.25	0.14	629|718|5199	CFB|C3|CFP	-2.6
Reactome Gene Sets	6	R-HSA-983695	GASTRITIS	Antigen activates B Cell Receptor (BCR) leading to generation of second messengers	-2.2	5.2	3.7	30286	32	724	4	0.55	0.28	4067|5336|5777|30011	LYN|PLCG2|PTPN6|SH3KBP1	-1.8
Reactome Gene Sets	6	R-HSA-983695	GC-NL	Antigen activates B Cell Receptor (BCR) leading to generation of second messengers	-2.3	4.4	3.7	30286	32	1076	5	0.46	0.21	4067|5336|5777|6786|30011	LYN|PLCG2|PTPN6|STIM1|SH3KBP1	-1.5
Reactome Gene Sets	6	R-HSA-983170	GASTRITIS	Antigen Presentation: Folding, assembly and peptide loading of class I MHC	-6.5	12	8.9	30286	29	724	8	1.1	0.39	811|2923|3106|3309|6890|6892|10484|51752	CALR|PDIA3|HLA-B|HSPA5|TAP1|TAPBP|SEC23A|ERAP1	-5.4
Reactome Gene Sets	6	R-HSA-983170	IM-LGD-L	Antigen Presentation: Folding, assembly and peptide loading of class I MHC	-2.6	5.2	4.2	30286	29	1012	5	0.49	0.22	811|3106|9871|10484|10802	CALR|HLA-B|SEC24D|SEC23A|SEC24A	-2.1
Reactome Gene Sets	6	R-HSA-1236975	GASTRITIS	Antigen processing-Cross presentation	-10	7.2	9.9	30286	105	724	18	2.5	0.58	811|929|1514|1536|2923|3106|3146|4012|4360|5694|5695|5696|5699|5721|6279|6890|6892|8517	CALR|CD14|CTSL|CYBB|PDIA3|HLA-B|HMGB1|LNPEP|MRC1|PSMB6|PSMB7|PSMB8|PSMB10|PSME2|S100A8|TAP1|TAPBP|IKBKG	-8.8
Reactome Gene Sets	6	R-HSA-1236975	GC-L	Antigen processing-Cross presentation	-4.6	6.9	6.4	30286	105	336	8	2.4	0.83	3106|4012|5696|5699|5721|6279|6892|8517	HLA-B|LNPEP|PSMB8|PSMB10|PSME2|S100A8|TAPBP|IKBKG	-3.8
Reactome Gene Sets	6	R-HSA-1236975	GC-NL	Antigen processing-Cross presentation	-6	4.3	6.5	30286	105	1076	16	1.5	0.37	929|1514|1536|2243|2244|3106|3685|5695|5704|6233|6279|6280|6892|8517|8673|9902	CD14|CTSL|CYBB|FGA|FGB|HLA-B|ITGAV|PSMB7|PSMC4|RPS27A|S100A8|S100A9|TAPBP|IKBKG|VAMP8|MRC2	-4.5
Reactome Gene Sets	6	R-HSA-1236975	EGC-L	Antigen processing-Cross presentation	-6	4	6.4	30286	105	1217	17	1.4	0.34	929|1514|1536|2243|2244|3106|3146|5696|5699|5704|5710|5721|6279|6280|9554|10952|23480	CD14|CTSL|CYBB|FGA|FGB|HLA-B|HMGB1|PSMB8|PSMB10|PSMC4|PSMD4|PSME2|S100A8|S100A9|SEC22B|SEC61B|SEC61G	-5
Reactome Gene Sets	6	R-HSA-1236975	IM-LGD-L	Antigen processing-Cross presentation	-5.7	4.3	6.3	30286	105	1012	15	1.5	0.38	811|2243|2244|3106|4012|5687|5692|5696|5699|5710|5721|6279|9554|10952|23480	CALR|FGA|FGB|HLA-B|LNPEP|PSMA6|PSMB4|PSMB8|PSMB10|PSMD4|PSME2|S100A8|SEC22B|SEC61B|SEC61G	-4.7
Reactome Gene Sets	6	R-HSA-6803157	GC-L	Antimicrobial peptides	-5.9	8.5	7.8	30286	95	336	9	2.7	0.88	820|1991|4057|5068|5657|6279|8993|55600|92747	CAMP|ELANE|LTF|REG3A|PRTN3|S100A8|PGLYRP1|ITLN1|BPIFB1	-4.9
Reactome Gene Sets	6	R-HSA-6803157	GC-NL	Antimicrobial peptides	-3.3	3.3	4.2	30286	95	1076	11	1	0.31	671|820|1991|4057|5657|6037|6279|6280|8993|55600|92747	BPI|CAMP|ELANE|LTF|PRTN3|RNASE3|S100A8|S100A9|PGLYRP1|ITLN1|BPIFB1	-2.3
Reactome Gene Sets	6	R-HSA-6803157	IM-LGD-NL	Antimicrobial peptides	-2.4	4.8	3.9	30286	95	333	5	1.5	0.67	5068|5657|6037|6279|55600	REG3A|PRTN3|RNASE3|S100A8|ITLN1	-1.6
Reactome Gene Sets	6	R-HSA-6803157	EGC-NL	Antimicrobial peptides	-3.2	11	5.9	30286	95	120	4	3.3	1.6	671|1991|5068|5657	BPI|ELANE|REG3A|PRTN3	-2.3
Reactome Gene Sets	6	R-HSA-1169410	EGC-L	Antiviral mechanism by IFN-stimulated genes	-9.6	4.3	8.4	30286	149	1217	26	2.1	0.41	103|983|1660|1968|1973|3312|3608|3837|3838|4599|4927|4938|4940|5611|5903|7175|7329|8086|8480|8894|9775|10382|10762|53371|81027|84617	ADAR|CDK1|DHX9|EIF2S3|EIF4A1|HSPA8|ILF2|KPNB1|KPNA2|MX1|NUP88|OAS1|OAS3|DNAJC3|RANBP2|TPR|UBE2I|AAAS|RAE1|EIF2S2|EIF4A3|TUBB4A|NUP50|NUP54|TUBB1|TUBB6	-8.2
Reactome Gene Sets	6	R-HSA-1169410	GASTRITIS	Antiviral mechanism by IFN-stimulated genes	-3.6	3.4	4.5	30286	149	724	12	1.7	0.47	103|983|1973|3837|4599|4938|7175|7318|7329|8480|8517|84617	ADAR|CDK1|EIF4A1|KPNB1|MX1|OAS1|TPR|UBA7|UBE2I|RAE1|IKBKG|TUBB6	-2.9
Reactome Gene Sets	6	R-HSA-1169410	GC-NL	Antiviral mechanism by IFN-stimulated genes	-2.2	2.3	3	30286	149	1076	12	1.1	0.32	983|1660|2316|3716|6233|7175|7329|8086|8480|8517|53371|84617	CDK1|DHX9|FLNA|JAK1|RPS27A|TPR|UBE2I|AAAS|RAE1|IKBKG|NUP54|TUBB6	-1.4
Reactome Gene Sets	6	R-HSA-176409	GASTRITIS	APC/C:Cdc20 mediated degradation of mitotic proteins	-2	3.3	3.2	30286	75	724	6	0.83	0.34	983|5694|5695|5696|5699|5721	CDK1|PSMB6|PSMB7|PSMB8|PSMB10|PSME2	-1.7
Reactome Gene Sets	6	R-HSA-179419	GASTRITIS	APC:Cdc20 mediated degradation of cell cycle proteins prior to satisfation of the cell cycle checkpoint	-2.1	3.4	3.3	30286	73	724	6	0.83	0.34	983|5694|5695|5696|5699|5721	CDK1|PSMB6|PSMB7|PSMB8|PSMB10|PSME2	-1.8
Reactome Gene Sets	6	R-HSA-109581	GASTRITIS	Apoptosis	-5.1	3.7	5.7	30286	180	724	16	2.2	0.55	929|3007|3009|3146|3148|3837|4001|4976|5694|5695|5696|5699|5721|7431|7529|79792	CD14|H1-3|H1-5|HMGB1|HMGB2|KPNB1|LMNB1|OPA1|PSMB6|PSMB7|PSMB8|PSMB10|PSME2|VIM|YWHAB|GSDMD	-4.2
Reactome Gene Sets	6	R-HSA-109581	EGC-L	Apoptosis	-4.4	2.8	4.9	30286	180	1217	20	1.6	0.36	929|3007|3009|3146|3148|3837|4001|4976|5062|5339|5580|5696|5699|5704|5710|5721|7431|7534|10134|353376	CD14|H1-3|H1-5|HMGB1|HMGB2|KPNB1|LMNB1|OPA1|PAK2|PLEC|PRKCD|PSMB8|PSMB10|PSMC4|PSMD4|PSME2|VIM|YWHAZ|BCAP31|TICAM2	-3.6
Reactome Gene Sets	6	R-HSA-109581	GC-NL	Apoptosis	-3.1	2.5	3.9	30286	180	1076	16	1.5	0.37	929|3007|3009|3148|4001|4976|5062|5339|5580|5695|5704|6233|7431|51074|56616|353376	CD14|H1-3|H1-5|HMGB2|LMNB1|OPA1|PAK2|PLEC|PRKCD|PSMB7|PSMC4|RPS27A|VIM|APIP|DIABLO|TICAM2	-2.2
Reactome Gene Sets	6	R-HSA-140342	GASTRITIS	Apoptosis induced DNA fragmentation	-5.1	16	8.5	30286	13	724	5	0.69	0.31	3007|3009|3146|3148|3837	H1-3|H1-5|HMGB1|HMGB2|KPNB1	-4.2
Reactome Gene Sets	6	R-HSA-140342	EGC-L	Apoptosis induced DNA fragmentation	-4	9.6	6.3	30286	13	1217	5	0.41	0.18	3007|3009|3146|3148|3837	H1-3|H1-5|HMGB1|HMGB2|KPNB1	-3.2
Reactome Gene Sets	6	R-HSA-140342	GC-NL	Apoptosis induced DNA fragmentation	-2	6.5	3.8	30286	13	1076	3	0.28	0.16	3007|3009|3148	H1-3|H1-5|HMGB2	-1.3
Reactome Gene Sets	6	R-HSA-75153	EGC-L	Apoptotic execution phase	-5.3	5.3	6.3	30286	52	1217	11	0.9	0.27	3007|3009|3146|3148|3837|4001|5062|5339|5580|7431|10134	H1-3|H1-5|HMGB1|HMGB2|KPNB1|LMNB1|PAK2|PLEC|PRKCD|VIM|BCAP31	-4.3
Reactome Gene Sets	6	R-HSA-75153	GASTRITIS	Apoptotic execution phase	-3.6	5.6	5.2	30286	52	724	7	0.97	0.36	3007|3009|3146|3148|3837|4001|7431	H1-3|H1-5|HMGB1|HMGB2|KPNB1|LMNB1|VIM	-3
Reactome Gene Sets	6	R-HSA-75153	GC-NL	Apoptotic execution phase	-3.3	4.3	4.6	30286	52	1076	8	0.74	0.26	3007|3009|3148|4001|5062|5339|5580|7431	H1-3|H1-5|HMGB2|LMNB1|PAK2|PLEC|PRKCD|VIM	-2.3
Reactome Gene Sets	6	R-HSA-8937144	EGC-L	Aryl hydrocarbon receptor signalling	-2.7	11	5.2	30286	7	1217	3	0.25	0.14	3326|9049|10728	HSP90AB1|AIP|PTGES3	-2.2
Reactome Gene Sets	6	R-HSA-8937144	GASTRITIS	Aryl hydrocarbon receptor signalling	-3.4	18	7	30286	7	724	3	0.41	0.24	3326|9049|10728	HSP90AB1|AIP|PTGES3	-2.7
Reactome Gene Sets	6	R-HSA-446203	EGC-L	Asparagine N-linked glycosylation	-7.1	2.8	6.4	30286	304	1217	34	2.8	0.47	378|381|829|966|1075|1522|1603|1650|1783|3998|6184|6185|6675|8813|9526|9554|9761|10113|10121|10382|10960|10972|11196|23256|23423|26958|54732|55860|56886|81027|84061|84617|91949|375056	ARF4|ARF5|CAPZA1|CD59|CTSC|CTSZ|DAD1|DDOST|DYNC1LI2|LMAN1|RPN1|RPN2|UAP1|DPM1|MPDU1|SEC22B|MLEC|PREB|ACTR1A|TUBB4A|LMAN2|TMED10|SEC23IP|SCFD1|TMED3|COPG2|TMED9|ACTR10|UGGT1|TUBB1|MAGT1|TUBB6|COG7|MIA3	-5.9
Reactome Gene Sets	6	R-HSA-446203	GASTRITIS	Asparagine N-linked glycosylation	-3.4	2.5	4.1	30286	304	724	18	2.5	0.58	381|811|829|966|1075|1522|2923|4245|7415|9761|10484|22870|23423|29925|51005|55808|80267|84617	ARF5|CALR|CAPZA1|CD59|CTSC|CTSZ|PDIA3|MGAT1|VCP|MLEC|SEC23A|PPP6R1|TMED3|GMPPB|AMDHD2|ST6GALNAC1|EDEM3|TUBB6	-2.8
Reactome Gene Sets	6	R-HSA-446203	IM-LGD-L	Asparagine N-linked glycosylation	-2.5	2	3.2	30286	304	1012	20	2	0.44	811|1075|1522|3998|5265|8813|9526|9554|9871|10113|10484|10802|10972|22870|29880|54732|55907|56052|80267|84061	CALR|CTSC|CTSZ|LMAN1|SERPINA1|DPM1|MPDU1|SEC22B|SEC24D|PREB|SEC23A|SEC24A|TMED10|PPP6R1|ALG5|TMED9|CMAS|ALG1|EDEM3|MAGT1	-2
Reactome Gene Sets	6	R-HSA-446203	GC-NL	Asparagine N-linked glycosylation	-2.5	1.9	3.2	30286	304	1076	21	2	0.42	381|966|1075|1522|1783|3998|4245|5265|6233|6675|9526|10121|10466|10484|54732|55860|83548|84342|84617|85365|91949	ARF5|CD59|CTSC|CTSZ|DYNC1LI2|LMAN1|MGAT1|SERPINA1|RPS27A|UAP1|MPDU1|ACTR1A|COG5|SEC23A|TMED9|ACTR10|COG3|COG8|TUBB6|ALG2|COG7	-1.7
Reactome Gene Sets	6	R-HSA-2022090	EGC-L	Assembly of collagen fibrils and other multimeric structures	-3.8	4.1	4.9	30286	61	1217	10	0.82	0.26	1277|1291|1292|1303|1508|1514|3655|3914|4318|5339	COL1A1|COL6A1|COL6A2|COL12A1|CTSB|CTSL|ITGA6|LAMB3|MMP9|PLEC	-3.1
Reactome Gene Sets	6	R-HSA-2022090	GC-NL	Assembly of collagen fibrils and other multimeric structures	-3.5	4.2	4.7	30286	61	1076	9	0.84	0.28	1291|1292|1303|1508|1514|3914|4318|5339|7837	COL6A1|COL6A2|COL12A1|CTSB|CTSL|LAMB3|MMP9|PLEC|PXDN	-2.5
Reactome Gene Sets	6	R-HSA-68867	IM-LGD-L	Assembly of the pre-replicative complex	-2.1	2.3	3	30286	141	1012	11	1.1	0.33	3014|4171|4173|4174|4175|5687|5692|5696|5699|5710|5721	H2AX|MCM2|MCM4|MCM5|MCM6|PSMA6|PSMB4|PSMB8|PSMB10|PSMD4|PSME2	-1.8
Reactome Gene Sets	6	R-HSA-390471	EGC-L	Association of TriC/CCT with target proteins during biosynthesis	-4	5.2	5.4	30286	38	1217	8	0.66	0.23	6499|10528|10564|10575|10694|22803|22948|26985	SKIC2|NOP56|ARFGEF2|CCT4|CCT8|XRN2|CCT5|AP3M1	-3.2
Reactome Gene Sets	6	R-HSA-4608870	GASTRITIS	Asymmetric localization of PCP proteins	-2.4	3.9	3.7	30286	64	724	6	0.83	0.34	5694|5695|5696|5699|5721|23513	PSMB6|PSMB7|PSMB8|PSMB10|PSME2|SCRIB	-2
Reactome Gene Sets	6	R-HSA-4608870	IM-LGD-L	Asymmetric localization of PCP proteins	-2.3	3.3	3.4	30286	64	1012	7	0.69	0.26	5687|5692|5696|5699|5710|5721|23513	PSMA6|PSMB4|PSMB8|PSMB10|PSMD4|PSME2|SCRIB	-1.9
Reactome Gene Sets	6	R-HSA-380994	EGC-L	ATF4 activates genes in response to endoplasmic reticulum stress	-4.1	6.5	5.8	30286	27	1217	7	0.58	0.22	8570|11340|51010|51013|54512|56915|118460	KHSRP|EXOSC8|EXOSC3|EXOSC1|EXOSC4|EXOSC5|EXOSC6	-3.4
Reactome Gene Sets	6	R-HSA-381183	GASTRITIS	ATF6 (ATF6-alpha) activates chaperone genes	-2.8	13	5.7	30286	10	724	3	0.41	0.24	811|3309|7184	CALR|HSPA5|HSP90B1	-2.3
Reactome Gene Sets	6	R-HSA-381033	GASTRITIS	ATF6 (ATF6-alpha) activates chaperones	-2.6	10	5.1	30286	12	724	3	0.41	0.24	811|3309|7184	CALR|HSPA5|HSP90B1	-2.1
Reactome Gene Sets	6	R-HSA-3371568	GASTRITIS	Attenuation phase	-2.4	9	4.7	30286	14	724	3	0.41	0.24	3320|3326|10728	HSP90AA1|HSP90AB1|PTGES3	-2
Reactome Gene Sets	6	R-HSA-3371568	EGC-L	Attenuation phase	-3.8	8.9	6	30286	14	1217	5	0.41	0.18	2288|3312|3320|3326|10728	FKBP4|HSPA8|HSP90AA1|HSP90AB1|PTGES3	-3.1
Reactome Gene Sets	6	R-HSA-450408	GC-L	AUF1 (hnRNP D0) binds and destabilizes mRNA	-2.5	6.4	4.3	30286	56	336	4	1.2	0.59	3184|5696|5699|5721	HNRNPD|PSMB8|PSMB10|PSME2	-2
Reactome Gene Sets	6	R-HSA-450408	IM-LGD-L	AUF1 (hnRNP D0) binds and destabilizes mRNA	-3.3	4.3	4.6	30286	56	1012	8	0.79	0.28	3184|3312|5687|5692|5696|5699|5710|5721	HNRNPD|HSPA8|PSMA6|PSMB4|PSMB8|PSMB10|PSMD4|PSME2	-2.7
Reactome Gene Sets	6	R-HSA-450408	EGC-L	AUF1 (hnRNP D0) binds and destabilizes mRNA	-2.2	3.1	3.2	30286	56	1217	7	0.58	0.22	3312|3315|5696|5699|5704|5710|5721	HSPA8|HSPB1|PSMB8|PSMB10|PSMC4|PSMD4|PSME2	-1.8
Reactome Gene Sets	6	R-HSA-8854518	EGC-L	AURKA Activation by TPX2	-2.6	3.1	3.6	30286	73	1217	9	0.74	0.25	983|3320|5048|5108|5577|10121|10382|22919|203068	CDK1|HSP90AA1|PAFAH1B1|PCM1|PRKAR2B|ACTR1A|TUBB4A|MAPRE1|TUBB	-2.1
Reactome Gene Sets	6	R-HSA-349425	GASTRITIS	Autodegradation of the E3 ubiquitin ligase COP1	-2.8	4.8	4.3	30286	52	724	6	0.83	0.34	472|5694|5695|5696|5699|5721	ATM|PSMB6|PSMB7|PSMB8|PSMB10|PSME2	-2.3
Reactome Gene Sets	6	R-HSA-349425	IM-LGD-L	Autodegradation of the E3 ubiquitin ligase COP1	-2.8	4	4.1	30286	52	1012	7	0.69	0.26	472|5687|5692|5696|5699|5710|5721	ATM|PSMA6|PSMB4|PSMB8|PSMB10|PSMD4|PSME2	-2.3
Reactome Gene Sets	6	R-HSA-9612973	EGC-L	Autophagy	-2.9	2.5	3.7	30286	151	1217	15	1.2	0.32	1783|2475|2670|3312|3320|3326|6035|7416|7431|8878|9927|10382|81027|84617|128866	DYNC1LI2|MTOR|GFAP|HSPA8|HSP90AA1|HSP90AB1|RNASE1|VDAC1|VIM|SQSTM1|MFN2|TUBB4A|TUBB1|TUBB6|CHMP4B	-2.4
Reactome Gene Sets	6	R-HSA-9612973	IM-LGD-L	Autophagy	-2.3	2.4	3.2	30286	151	1012	12	1.2	0.34	472|2475|2670|3312|3320|7416|8878|9868|9927|29082|56993|128866	ATM|MTOR|GFAP|HSPA8|HSP90AA1|VDAC1|SQSTM1|TOMM70|MFN2|CHMP4A|TOMM22|CHMP4B	-1.9
Reactome Gene Sets	6	R-HSA-422475	EGC-L	Axon guidance	-7.5	2.3	6.4	30286	548	1217	51	4.2	0.57	214|388|1173|1291|1292|1605|1741|1809|3312|3320|3326|3674|4067|4318|4478|4627|4637|4736|5062|5216|5217|5696|5699|5704|5710|5721|5786|5788|6122|6134|6135|6136|6139|6146|6188|6193|6210|6231|6923|7094|7408|9775|9826|10095|10382|10552|23521|30011|81027|84617|103910	ALCAM|RHOB|AP2M1|COL6A1|COL6A2|DAG1|DLG3|DPYSL3|HSPA8|HSP90AA1|HSP90AB1|ITGA2B|LYN|MMP9|MSN|MYH9|MYL6|RPL10A|PAK2|PFN1|PFN2|PSMB8|PSMB10|PSMC4|PSMD4|PSME2|PTPRA|PTPRC|RPL3|RPL10|RPL11|RPL12|RPL17|RPL22|RPS3|RPS5|RPS15A|RPS26|ELOB|TLN1|VASP|EIF4A3|ARHGEF11|ARPC1B|TUBB4A|ARPC1A|RPL13A|SH3KBP1|TUBB1|TUBB6|MYL12B	-6.3
Reactome Gene Sets	6	R-HSA-422475	GC-NL	Axon guidance	-5.9	2.2	5.5	30286	548	1076	43	4	0.6	1173|1213|1291|1292|1605|1741|1809|2049|2197|3326|3673|3678|3685|4067|4313|4318|4478|4627|4637|4736|5062|5217|5695|5704|5788|6146|6169|6170|6193|6209|6210|6233|6235|7094|7430|7525|9349|10095|10552|23521|30011|84617|103910	AP2M1|CLTC|COL6A1|COL6A2|DAG1|DLG3|DPYSL3|EPHB3|FAU|HSP90AB1|ITGA2|ITGA5|ITGAV|LYN|MMP2|MMP9|MSN|MYH9|MYL6|RPL10A|PAK2|PFN2|PSMB7|PSMC4|PTPRC|RPL22|RPL38|RPL39|RPS5|RPS15|RPS15A|RPS27A|RPS29|TLN1|EZR|YES1|RPL23|ARPC1B|ARPC1A|RPL13A|SH3KBP1|TUBB6|MYL12B	-4.4
Reactome Gene Sets	6	R-HSA-422475	IM-LGD-L	Axon guidance	-4.7	2.1	4.7	30286	548	1012	38	3.8	0.6	214|1072|1605|1741|2197|3312|3320|3672|3673|3674|4067|4637|4893|5216|5217|5306|5687|5692|5696|5699|5710|5721|5786|5788|6146|6195|6197|6231|7430|8976|9775|9826|9939|10095|10109|10552|30011|200916	ALCAM|CFL1|DAG1|DLG3|FAU|HSPA8|HSP90AA1|ITGA1|ITGA2|ITGA2B|LYN|MYL6|NRAS|PFN1|PFN2|PITPNA|PSMA6|PSMB4|PSMB8|PSMB10|PSMD4|PSME2|PTPRA|PTPRC|RPL22|RPS6KA1|RPS6KA3|RPS26|EZR|WASL|EIF4A3|ARHGEF11|RBM8A|ARPC1B|ARPC2|ARPC1A|SH3KBP1|RPL22L1	-3.8
Reactome Gene Sets	6	R-HSA-422475	GASTRITIS	Axon guidance	-2.8	1.9	3.4	30286	548	724	25	3.5	0.68	1291|1292|1741|1956|3320|3326|4067|4478|5217|5532|5694|5695|5696|5699|5721|5788|6209|6456|7094|7430|8976|10095|30011|84617|200916	COL6A1|COL6A2|DLG3|EGFR|HSP90AA1|HSP90AB1|LYN|MSN|PFN2|PPP3CB|PSMB6|PSMB7|PSMB8|PSMB10|PSME2|PTPRC|RPS15|SH3GL2|TLN1|EZR|WASL|ARPC1B|SH3KBP1|TUBB6|RPL22L1	-2.3
Reactome Gene Sets	6	R-HSA-9824439	GASTRITIS	Bacterial Infection Pathways	-6.8	6.9	7.9	30286	73	724	12	1.7	0.47	867|1938|3320|3326|3837|4360|6421|6456|8027|11151|30011|57674	CBL|EEF2|HSP90AA1|HSP90AB1|KPNB1|MRC1|SFPQ|SH3GL2|STAM|CORO1A|SH3KBP1|RNF213	-5.7
Reactome Gene Sets	6	R-HSA-9824439	EGC-L	Bacterial Infection Pathways	-6	4.8	6.6	30286	73	1217	14	1.2	0.31	867|1938|2023|2060|3320|3326|3837|4057|6421|6455|6844|8027|11151|30011	CBL|EEF2|ENO1|EPS15|HSP90AA1|HSP90AB1|KPNB1|LTF|SFPQ|SH3GL1|VAMP2|STAM|CORO1A|SH3KBP1	-4.9
Reactome Gene Sets	6	R-HSA-9824439	GC-L	Bacterial Infection Pathways	-2.9	6.2	4.7	30286	73	336	5	1.5	0.66	4057|6421|6455|6456|30011	LTF|SFPQ|SH3GL1|SH3GL2|SH3KBP1	-2.4
Reactome Gene Sets	6	R-HSA-9824439	GC-NL	Bacterial Infection Pathways	-3.6	3.9	4.7	30286	73	1076	10	0.93	0.29	867|3326|4057|6233|6421|6455|6844|8027|11151|30011	CBL|HSP90AB1|LTF|RPS27A|SFPQ|SH3GL1|VAMP2|STAM|CORO1A|SH3KBP1	-2.5
Reactome Gene Sets	6	R-HSA-9824439	IM-LGD-NL	Bacterial Infection Pathways	-2.1	5	3.6	30286	73	333	4	1.2	0.6	867|3326|8027|11151	CBL|HSP90AB1|STAM|CORO1A	-1.3
Reactome Gene Sets	6	R-HSA-73884	EGC-L	Base Excision Repair	-4.8	3.8	5.5	30286	91	1217	14	1.2	0.31	142|2237|4350|5111|5424|5425|5982|5984|6117|6119|7515|54107|54386|128312	PARP1|FEN1|MPG|PCNA|POLD1|POLD2|RFC2|RFC4|RPA1|RPA3|XRCC1|POLE3|TERF2IP|H2BC26	-3.9
Reactome Gene Sets	6	R-HSA-73884	GC-NL	Base Excision Repair	-2.8	3.1	3.8	30286	91	1076	10	0.93	0.29	142|2237|4350|5111|5424|5981|5982|5984|54107|54386	PARP1|FEN1|MPG|PCNA|POLD1|RFC1|RFC2|RFC4|POLE3|TERF2IP	-1.9
Reactome Gene Sets	6	R-HSA-73884	GASTRITIS	Base Excision Repair	-2.8	3.7	4	30286	91	724	8	1.1	0.39	142|2237|4350|5111|5424|5982|6117|54386	PARP1|FEN1|MPG|PCNA|POLD1|RFC2|RPA1|TERF2IP	-2.3
Reactome Gene Sets	6	R-HSA-77346	IM-LGD-L	Beta oxidation of decanoyl-CoA to octanoyl-CoA-CoA	-4.8	20	8.6	30286	6	1012	4	0.4	0.2	34|1892|3030|3032	ACADM|ECHS1|HADHA|HADHB	-3.9
Reactome Gene Sets	6	R-HSA-77346	GC-NL	Beta oxidation of decanoyl-CoA to octanoyl-CoA-CoA	-4.6	19	8.4	30286	6	1076	4	0.37	0.19	34|1892|3030|3032	ACADM|ECHS1|HADHA|HADHB	-3.3
Reactome Gene Sets	6	R-HSA-77346	EGC-L	Beta oxidation of decanoyl-CoA to octanoyl-CoA-CoA	-4.4	17	7.8	30286	6	1217	4	0.33	0.16	34|1892|3030|3032	ACADM|ECHS1|HADHA|HADHB	-3.6
Reactome Gene Sets	6	R-HSA-77350	IM-LGD-L	Beta oxidation of hexanoyl-CoA to butanoyl-CoA	-5.2	24	9.5	30286	5	1012	4	0.4	0.2	35|1892|3030|3032	ACADS|ECHS1|HADHA|HADHB	-4.3
Reactome Gene Sets	6	R-HSA-77350	GC-NL	Beta oxidation of hexanoyl-CoA to butanoyl-CoA	-5.1	23	9.2	30286	5	1076	4	0.37	0.19	35|1892|3030|3032	ACADS|ECHS1|HADHA|HADHB	-3.7
Reactome Gene Sets	6	R-HSA-77350	EGC-L	Beta oxidation of hexanoyl-CoA to butanoyl-CoA	-4.9	20	8.7	30286	5	1217	4	0.33	0.16	35|1892|3030|3032	ACADS|ECHS1|HADHA|HADHB	-4
Reactome Gene Sets	6	R-HSA-77350	GASTRITIS	Beta oxidation of hexanoyl-CoA to butanoyl-CoA	-3.9	25	8.4	30286	5	724	3	0.41	0.24	35|3030|3032	ACADS|HADHA|HADHB	-3.2
Reactome Gene Sets	6	R-HSA-77310	IM-LGD-L	Beta oxidation of lauroyl-CoA to decanoyl-CoA-CoA	-3.5	18	7.1	30286	5	1012	3	0.3	0.17	1892|3030|3032	ECHS1|HADHA|HADHB	-2.8
Reactome Gene Sets	6	R-HSA-77310	GC-NL	Beta oxidation of lauroyl-CoA to decanoyl-CoA-CoA	-3.4	17	6.8	30286	5	1076	3	0.28	0.16	1892|3030|3032	ECHS1|HADHA|HADHB	-2.3
Reactome Gene Sets	6	R-HSA-77310	EGC-L	Beta oxidation of lauroyl-CoA to decanoyl-CoA-CoA	-3.2	15	6.4	30286	5	1217	3	0.25	0.14	1892|3030|3032	ECHS1|HADHA|HADHB	-2.6
Reactome Gene Sets	6	R-HSA-77348	IM-LGD-L	Beta oxidation of octanoyl-CoA to hexanoyl-CoA	-5.2	24	9.5	30286	5	1012	4	0.4	0.2	34|1892|3030|3032	ACADM|ECHS1|HADHA|HADHB	-4.3
Reactome Gene Sets	6	R-HSA-77348	GC-NL	Beta oxidation of octanoyl-CoA to hexanoyl-CoA	-5.1	23	9.2	30286	5	1076	4	0.37	0.19	34|1892|3030|3032	ACADM|ECHS1|HADHA|HADHB	-3.7
Reactome Gene Sets	6	R-HSA-77348	EGC-L	Beta oxidation of octanoyl-CoA to hexanoyl-CoA	-4.9	20	8.7	30286	5	1217	4	0.33	0.16	34|1892|3030|3032	ACADM|ECHS1|HADHA|HADHB	-4
Reactome Gene Sets	6	R-HSA-2173782	IM-LGD-L	Binding and Uptake of Ligands by Scavenger Receptors	-6	7.1	7.4	30286	42	1012	10	0.99	0.31	259|335|338|348|811|3263|3320|3512|7184|8542	AMBP|APOA1|APOB|APOE|CALR|HPX|HSP90AA1|JCHAIN|HSP90B1|APOL1	-5
Reactome Gene Sets	6	R-HSA-2173782	EGC-L	Binding and Uptake of Ligands by Scavenger Receptors	-2.9	4.1	4.2	30286	42	1217	7	0.58	0.22	335|338|348|1277|3320|6678|10525	APOA1|APOB|APOE|COL1A1|HSP90AA1|SPARC|HYOU1	-2.4
Reactome Gene Sets	6	R-HSA-2173782	GASTRITIS	Binding and Uptake of Ligands by Scavenger Receptors	-2.5	5	4	30286	42	724	5	0.69	0.31	811|3320|3512|7184|23166	CALR|HSP90AA1|JCHAIN|HSP90B1|STAB1	-2.1
Reactome Gene Sets	6	R-HSA-211859	GC-NL	Biological oxidations	-7	3.3	6.6	30286	222	1076	26	2.4	0.47	26|126|216|218|1312|1727|2230|2328|3326|4128|4257|4259|6817|6822|7172|9049|9060|9061|22977|27284|29785|51504|54996|55748|55902|134147	AOC1|ADH1C|ALDH1A1|ALDH3A1|COMT|CYB5R3|FDX1|FMO3|HSP90AB1|MAOA|MGST1|MGST3|SULT1A1|SULT2A1|TPMT|AIP|PAPSS2|PAPSS1|AKR7A3|SULT1B1|CYP2S1|TRMT112|MTARC2|CNDP2|ACSS2|CMBL	-5.3
Reactome Gene Sets	6	R-HSA-211859	EGC-L	Biological oxidations	-7	3.1	6.5	30286	222	1217	28	2.3	0.43	125|126|191|216|1727|2052|2328|2940|3326|4128|4144|4257|4258|4259|6822|7360|9049|9060|10728|22977|27284|29785|51504|54996|55748|55902|79017|134147	ADH1B|ADH1C|AHCY|ALDH1A1|CYB5R3|EPHX1|FMO3|GSTA3|HSP90AB1|MAOA|MAT2A|MGST1|MGST2|MGST3|SULT2A1|UGP2|AIP|PAPSS2|PTGES3|AKR7A3|SULT1B1|CYP2S1|TRMT112|MTARC2|CNDP2|ACSS2|GGCT|CMBL	-5.9
Reactome Gene Sets	6	R-HSA-211859	GASTRITIS	Biological oxidations	-5.1	3.4	5.6	30286	222	724	18	2.5	0.58	26|130|216|217|1312|1727|2328|2940|3326|4128|4259|6817|7360|9049|10728|22977|26873|27284	AOC1|ADH6|ALDH1A1|ALDH2|COMT|CYB5R3|FMO3|GSTA3|HSP90AB1|MAOA|MGST3|SULT1A1|UGP2|AIP|PTGES3|AKR7A3|OPLAH|SULT1B1	-4.2
Reactome Gene Sets	6	R-HSA-211859	IM-LGD-L	Biological oxidations	-5.8	3.1	5.8	30286	222	1012	23	2.3	0.47	26|125|216|219|1312|1727|2052|2230|4128|4144|4257|4259|6822|7172|8824|9049|9061|10728|22977|26873|51504|54996|91703	AOC1|ADH1B|ALDH1A1|ALDH1B1|COMT|CYB5R3|EPHX1|FDX1|MAOA|MAT2A|MGST1|MGST3|SULT2A1|TPMT|CES2|AIP|PAPSS1|PTGES3|AKR7A3|OPLAH|TRMT112|MTARC2|ACY3	-4.8
Reactome Gene Sets	6	R-HSA-211859	GC-L	Biological oxidations	-2.5	3.2	3.6	30286	222	336	8	2.4	0.83	1727|2328|4128|4257|4258|4259|9049|22977	CYB5R3|FMO3|MAOA|MGST1|MGST2|MGST3|AIP|AKR7A3	-2
Reactome Gene Sets	6	R-HSA-211859	IM-LGD-NL	Biological oxidations	-5.9	5.3	6.8	30286	222	333	13	3.9	1.1	130|216|1727|2328|2940|3326|4128|4259|10728|22977|27284|54996|55748	ADH6|ALDH1A1|CYB5R3|FMO3|GSTA3|HSP90AB1|MAOA|MGST3|PTGES3|AKR7A3|SULT1B1|MTARC2|CNDP2	-4.4
Reactome Gene Sets	6	R-HSA-196780	EGC-L	Biotin transport and metabolism	-5.8	14	8.5	30286	11	1217	6	0.49	0.2	31|686|5091|5095|56922|64087	ACACA|BTD|PC|PCCA|MCCC1|MCCC2	-4.8
Reactome Gene Sets	6	R-HSA-196780	IM-LGD-L	Biotin transport and metabolism	-4.8	14	7.8	30286	11	1012	5	0.49	0.22	31|5091|5095|56922|64087	ACACA|PC|PCCA|MCCC1|MCCC2	-3.9
Reactome Gene Sets	6	R-HSA-196780	GC-NL	Biotin transport and metabolism	-4.7	13	7.5	30286	11	1076	5	0.46	0.21	686|5091|5095|56922|64087	BTD|PC|PCCA|MCCC1|MCCC2	-3.3
Reactome Gene Sets	6	R-HSA-196780	GASTRITIS	Biotin transport and metabolism	-2.7	11	5.4	30286	11	724	3	0.41	0.24	5095|56922|64087	PCCA|MCCC1|MCCC2	-2.2
Reactome Gene Sets	6	R-HSA-196780	IM-LGD-NL	Biotin transport and metabolism	-3.7	25	8.3	30286	11	333	3	0.9	0.52	31|5095|56922	ACACA|PCCA|MCCC1	-2.6
Reactome Gene Sets	6	R-HSA-70895	GASTRITIS	Branched-chain amino acid catabolism	-16	26	18	30286	21	724	13	1.8	0.49	36|38|549|593|594|1629|3028|3712|4329|11112|27034|56922|64087	ACADSB|ACAT1|AUH|BCKDHA|BCKDHB|DBT|HSD17B10|IVD|ALDH6A1|HIBADH|ACAD8|MCCC1|MCCC2	-14
Reactome Gene Sets	6	R-HSA-70895	IM-LGD-NL	Branched-chain amino acid catabolism	-7.1	26	12	30286	21	333	6	1.8	0.73	1629|3028|3712|4329|27034|56922	DBT|HSD17B10|IVD|ALDH6A1|ACAD8|MCCC1	-5.4
Reactome Gene Sets	6	R-HSA-70895	IM-LGD-L	Branched-chain amino acid catabolism	-18	21	17	30286	21	1012	15	1.5	0.38	36|38|549|587|593|594|1629|1892|3028|3712|4329|11112|27034|56922|64087	ACADSB|ACAT1|AUH|BCAT2|BCKDHA|BCKDHB|DBT|ECHS1|HSD17B10|IVD|ALDH6A1|HIBADH|ACAD8|MCCC1|MCCC2	-16
Reactome Gene Sets	6	R-HSA-70895	GC-NL	Branched-chain amino acid catabolism	-17	20	17	30286	21	1076	15	1.4	0.36	36|38|549|587|593|594|1629|1892|3028|3712|4329|11112|27034|56922|64087	ACADSB|ACAT1|AUH|BCAT2|BCKDHA|BCKDHB|DBT|ECHS1|HSD17B10|IVD|ALDH6A1|HIBADH|ACAD8|MCCC1|MCCC2	-15
Reactome Gene Sets	6	R-HSA-70895	EGC-L	Branched-chain amino acid catabolism	-16	18	16	30286	21	1217	15	1.2	0.32	36|38|549|587|593|594|1629|1892|3028|3712|4329|11112|27034|56922|64087	ACADSB|ACAT1|AUH|BCAT2|BCKDHA|BCKDHB|DBT|ECHS1|HSD17B10|IVD|ALDH6A1|HIBADH|ACAD8|MCCC1|MCCC2	-15
Reactome Gene Sets	6	R-HSA-450385	GASTRITIS	Butyrate Response Factor 1 (BRF1) binds and destabilizes mRNA	-2.1	7.4	4.1	30286	17	724	3	0.41	0.24	7529|9261|55802	YWHAB|MAPKAPK2|DCP1A	-1.8
Reactome Gene Sets	6	R-HSA-450385	EGC-L	Butyrate Response Factor 1 (BRF1) binds and destabilizes mRNA	-5.6	10	7.8	30286	17	1217	7	0.58	0.22	11340|51010|51013|54512|55802|56915|118460	EXOSC8|EXOSC3|EXOSC1|EXOSC4|DCP1A|EXOSC5|EXOSC6	-4.7
Reactome Gene Sets	6	R-HSA-72737	EGC-L	Cap-dependent Translation Initiation	-4	3.1	4.7	30286	120	1217	15	1.2	0.32	1968|1973|4736|6122|6134|6135|6136|6139|6146|6188|6193|6210|6231|8894|23521	EIF2S3|EIF4A1|RPL10A|RPL3|RPL10|RPL11|RPL12|RPL17|RPL22|RPS3|RPS5|RPS15A|RPS26|EIF2S2|RPL13A	-3.3
Reactome Gene Sets	6	R-HSA-72737	GC-NL	Cap-dependent Translation Initiation	-3.5	3	4.3	30286	120	1076	13	1.2	0.33	1964|2197|4736|6146|6169|6170|6193|6209|6210|6233|6235|9349|23521	EIF1AX|FAU|RPL10A|RPL22|RPL38|RPL39|RPS5|RPS15|RPS15A|RPS27A|RPS29|RPL23|RPL13A	-2.4
Reactome Gene Sets	6	R-HSA-5694530	IM-LGD-L	Cargo concentration in the ER	-7.1	9.1	8.6	30286	33	1012	10	0.99	0.31	1075|1522|3998|5265|9554|9871|10113|10484|10802|10972	CTSC|CTSZ|LMAN1|SERPINA1|SEC22B|SEC24D|PREB|SEC23A|SEC24A|TMED10	-5.9
Reactome Gene Sets	6	R-HSA-5694530	EGC-L	Cargo concentration in the ER	-5.4	6.8	6.8	30286	33	1217	9	0.74	0.25	966|1075|1522|3998|9554|10113|10960|10972|375056	CD59|CTSC|CTSZ|LMAN1|SEC22B|PREB|LMAN2|TMED10|MIA3	-4.4
Reactome Gene Sets	6	R-HSA-5694530	GC-L	Cargo concentration in the ER	-2.2	8.2	4.4	30286	33	336	3	0.89	0.51	966|1075|1522	CD59|CTSC|CTSZ	-1.9
Reactome Gene Sets	6	R-HSA-5694530	GASTRITIS	Cargo concentration in the ER	-2.1	5.1	3.7	30286	33	724	4	0.55	0.28	966|1075|1522|10484	CD59|CTSC|CTSZ|SEC23A	-1.8
Reactome Gene Sets	6	R-HSA-5694530	GC-NL	Cargo concentration in the ER	-3	5.1	4.5	30286	33	1076	6	0.56	0.23	966|1075|1522|3998|5265|10484	CD59|CTSC|CTSZ|LMAN1|SERPINA1|SEC23A	-2.1
Reactome Gene Sets	6	R-HSA-5694530	IM-LGD-NL	Cargo concentration in the ER	-2.2	8.3	4.4	30286	33	333	3	0.9	0.52	1075|1522|10484	CTSC|CTSZ|SEC23A	-1.5
Reactome Gene Sets	6	R-HSA-8856825	GC-NL	Cargo recognition for clathrin-mediated endocytosis	-5.3	4	5.9	30286	106	1076	15	1.4	0.36	156|338|867|1173|1213|3267|6233|6455|6844|7037|8027|8673|29978|30011|51138	GRK2|APOB|CBL|AP2M1|CLTC|AGFG1|RPS27A|SH3GL1|VAMP2|TFRC|STAM|VAMP8|UBQLN2|SH3KBP1|COPS4	-3.9
Reactome Gene Sets	6	R-HSA-8856825	EGC-L	Cargo recognition for clathrin-mediated endocytosis	-3.5	3.1	4.3	30286	106	1217	13	1.1	0.29	156|338|867|1173|2060|3267|6455|6844|7018|7037|8027|29978|30011	GRK2|APOB|CBL|AP2M1|EPS15|AGFG1|SH3GL1|VAMP2|TF|TFRC|STAM|UBQLN2|SH3KBP1	-2.8
Reactome Gene Sets	6	R-HSA-8856825	IM-LGD-L	Cargo recognition for clathrin-mediated endocytosis	-3.1	3.1	4	30286	106	1012	11	1.1	0.33	156|338|950|3267|6844|7018|7037|8027|22848|27348|30011	GRK2|APOB|SCARB2|AGFG1|VAMP2|TF|TFRC|STAM|AAK1|TOR1B|SH3KBP1	-2.5
Reactome Gene Sets	6	R-HSA-5620920	EGC-L	Cargo trafficking to the periciliary membrane	-2.4	3.4	3.5	30286	51	1217	7	0.58	0.22	378|6102|10575|10694|22948|55770|60412	ARF4|RP2|CCT4|CCT8|CCT5|EXOC2|EXOC4	-2
Reactome Gene Sets	6	R-HSA-200425	EGC-L	Carnitine metabolism	-2.7	7.1	4.7	30286	14	1217	4	0.33	0.16	31|788|1374|1376	ACACA|SLC25A20|CPT1A|CPT2	-2.2
Reactome Gene Sets	6	R-HSA-5621575	IM-LGD-L	CD209 (DC-SIGN) signaling	-2.3	5.7	4	30286	21	1012	4	0.4	0.2	3385|4067|4790|4893	ICAM3|LYN|NFKB1|NRAS	-1.9
Reactome Gene Sets	6	R-HSA-174184	GASTRITIS	Cdc20:Phospho-APC/C mediated degradation of Cyclin A	-2.1	3.5	3.3	30286	72	724	6	0.83	0.34	983|5694|5695|5696|5699|5721	CDK1|PSMB6|PSMB7|PSMB8|PSMB10|PSME2	-1.8
Reactome Gene Sets	6	R-HSA-9013148	GASTRITIS	CDC42 GTPase cycle	-2.4	2.7	3.3	30286	155	724	10	1.4	0.43	397|7037|7456|8976|23048|23513|23526|50619|55240|121512	ARHGDIB|TFRC|WIPF1|WASL|FNBP1|SCRIB|ARHGAP45|DEF6|STEAP3|FGD4	-2
Reactome Gene Sets	6	R-HSA-9013148	IM-LGD-NL	CDC42 GTPase cycle	-2.8	4.1	4.1	30286	155	333	7	2.1	0.79	397|7037|7454|7456|10788|50619|55240	ARHGDIB|TFRC|WAS|WIPF1|IQGAP2|DEF6|STEAP3	-1.9
Reactome Gene Sets	6	R-HSA-9013148	GC-NL	CDC42 GTPase cycle	-2.4	2.4	3.3	30286	155	1076	13	1.2	0.33	397|2040|5062|7037|7454|7456|8826|10788|11135|23526|50619|55240|121512	ARHGDIB|STOM|PAK2|TFRC|WAS|WIPF1|IQGAP1|IQGAP2|CDC42EP1|ARHGAP45|DEF6|STEAP3|FGD4	-1.6
Reactome Gene Sets	6	R-HSA-1640170	EGC-L	Cell Cycle	-9.6	2.3	7.3	30286	692	1217	65	5.3	0.64	983|1104|1783|2237|3320|3326|3837|4001|4067|4171|4173|4174|4175|4683|4927|5048|5108|5111|5424|5425|5434|5577|5696|5699|5704|5710|5721|5901|5903|5905|5931|5982|5984|6117|6119|7112|7175|7329|7534|8086|8243|8480|8607|9126|10111|10121|10382|10592|10726|10762|10856|11083|22919|23592|53371|54107|54386|55505|55920|81027|84617|128312|128866|203068|221496	CDK1|RCC1|DYNC1LI2|FEN1|HSP90AA1|HSP90AB1|KPNB1|LMNB1|LYN|MCM2|MCM4|MCM5|MCM6|NBN|NUP88|PAFAH1B1|PCM1|PCNA|POLD1|POLD2|POLR2E|PRKAR2B|PSMB8|PSMB10|PSMC4|PSMD4|PSME2|RAN|RANBP2|RANGAP1|RBBP7|RFC2|RFC4|RPA1|RPA3|TMPO|TPR|UBE2I|YWHAZ|AAAS|SMC1A|RAE1|RUVBL1|SMC3|RAD50|ACTR1A|TUBB4A|SMC2|NUDC|NUP50|RUVBL2|DIDO1|MAPRE1|LEMD3|NUP54|POLE3|TERF2IP|NOP10|RCC2|TUBB1|TUBB6|H2BC26|CHMP4B|TUBB|LEMD2	-8.2
Reactome Gene Sets	6	R-HSA-1640170	GASTRITIS	Cell Cycle	-5.3	2.2	5.2	30286	692	724	37	5.1	0.82	472|983|1021|2237|3320|3326|3837|4001|4067|4173|4175|4683|5048|5111|5424|5694|5695|5696|5699|5721|5901|5982|6117|7175|7329|7529|8480|9126|10111|10592|23592|25978|54386|55920|84617|203068|221496	ATM|CDK1|CDK6|FEN1|HSP90AA1|HSP90AB1|KPNB1|LMNB1|LYN|MCM4|MCM6|NBN|PAFAH1B1|PCNA|POLD1|PSMB6|PSMB7|PSMB8|PSMB10|PSME2|RAN|RFC2|RPA1|TPR|UBE2I|YWHAB|RAE1|SMC3|RAD50|SMC2|LEMD3|CHMP2B|TERF2IP|RCC2|TUBB6|TUBB|LEMD2	-4.3
Reactome Gene Sets	6	R-HSA-1640170	GC-NL	Cell Cycle	-3.5	1.7	3.8	30286	692	1076	43	4	0.6	983|1104|1783|2237|3326|4001|4067|4171|4173|4174|4175|4683|5048|5111|5424|5434|5695|5704|5901|5931|5981|5982|5984|6233|7175|7329|8086|8243|8467|8480|10121|10592|10726|10856|11083|23592|53371|54107|54386|55505|55920|84617|203068	CDK1|RCC1|DYNC1LI2|FEN1|HSP90AB1|LMNB1|LYN|MCM2|MCM4|MCM5|MCM6|NBN|PAFAH1B1|PCNA|POLD1|POLR2E|PSMB7|PSMC4|RAN|RBBP7|RFC1|RFC2|RFC4|RPS27A|TPR|UBE2I|AAAS|SMC1A|SMARCA5|RAE1|ACTR1A|SMC2|NUDC|RUVBL2|DIDO1|LEMD3|NUP54|POLE3|TERF2IP|NOP10|RCC2|TUBB6|TUBB	-2.4
Reactome Gene Sets	6	R-HSA-1640170	IM-LGD-L	Cell Cycle	-3.8	1.8	4	30286	692	1012	42	4.2	0.63	472|2010|3014|3320|4001|4067|4171|4173|4174|4175|4683|4927|5111|5424|5425|5434|5687|5692|5696|5699|5710|5721|5901|5905|5982|6118|7329|8480|10111|10592|10726|10762|10856|11083|22919|23592|29082|54386|55505|55920|128866|221496	ATM|EMD|H2AX|HSP90AA1|LMNB1|LYN|MCM2|MCM4|MCM5|MCM6|NBN|NUP88|PCNA|POLD1|POLD2|POLR2E|PSMA6|PSMB4|PSMB8|PSMB10|PSMD4|PSME2|RAN|RANGAP1|RFC2|RPA2|UBE2I|RAE1|RAD50|SMC2|NUDC|NUP50|RUVBL2|DIDO1|MAPRE1|LEMD3|CHMP4A|TERF2IP|NOP10|RCC2|CHMP4B|LEMD2	-3.1
Reactome Gene Sets	6	R-HSA-69620	GASTRITIS	Cell Cycle Checkpoints	-2.7	2.3	3.5	30286	292	724	16	2.2	0.55	472|983|4173|4175|4683|5048|5694|5695|5696|5699|5721|5982|6117|7529|10111|55920	ATM|CDK1|MCM4|MCM6|NBN|PAFAH1B1|PSMB6|PSMB7|PSMB8|PSMB10|PSME2|RFC2|RPA1|YWHAB|RAD50|RCC2	-2.2
Reactome Gene Sets	6	R-HSA-69620	IM-LGD-L	Cell Cycle Checkpoints	-2.7	2	3.4	30286	292	1012	20	2	0.44	472|3014|4171|4173|4174|4175|4683|5687|5692|5696|5699|5710|5721|5905|5982|6118|10111|10726|22919|55920	ATM|H2AX|MCM2|MCM4|MCM5|MCM6|NBN|PSMA6|PSMB4|PSMB8|PSMB10|PSMD4|PSME2|RANGAP1|RFC2|RPA2|RAD50|NUDC|MAPRE1|RCC2	-2.2
Reactome Gene Sets	6	R-HSA-69620	EGC-L	Cell Cycle Checkpoints	-3.5	2.1	4	30286	292	1217	25	2.1	0.41	983|1783|4171|4173|4174|4175|4683|5048|5696|5699|5704|5710|5721|5903|5905|5982|5984|6117|6119|7534|10111|10726|22919|55920|128312	CDK1|DYNC1LI2|MCM2|MCM4|MCM5|MCM6|NBN|PAFAH1B1|PSMB8|PSMB10|PSMC4|PSMD4|PSME2|RANBP2|RANGAP1|RFC2|RFC4|RPA1|RPA3|YWHAZ|RAD50|NUDC|MAPRE1|RCC2|H2BC26	-2.8
Reactome Gene Sets	6	R-HSA-69278	GASTRITIS	Cell Cycle, Mitotic	-5.2	2.4	5.2	30286	561	724	32	4.4	0.76	983|1021|2237|3320|3326|3837|4001|4067|4173|4175|5048|5111|5424|5694|5695|5696|5699|5721|5901|5982|6117|7175|7329|8480|9126|10592|23592|25978|55920|84617|203068|221496	CDK1|CDK6|FEN1|HSP90AA1|HSP90AB1|KPNB1|LMNB1|LYN|MCM4|MCM6|PAFAH1B1|PCNA|POLD1|PSMB6|PSMB7|PSMB8|PSMB10|PSME2|RAN|RFC2|RPA1|TPR|UBE2I|RAE1|SMC3|SMC2|LEMD3|CHMP2B|RCC2|TUBB6|TUBB|LEMD2	-4.3
Reactome Gene Sets	6	R-HSA-69278	IM-LGD-L	Cell Cycle, Mitotic	-3.2	1.8	3.6	30286	561	1012	34	3.4	0.57	2010|3014|3320|4001|4067|4171|4173|4174|4175|4927|5111|5424|5425|5687|5692|5696|5699|5710|5721|5901|5905|5982|6118|7329|8480|10592|10726|10762|22919|23592|29082|55920|128866|221496	EMD|H2AX|HSP90AA1|LMNB1|LYN|MCM2|MCM4|MCM5|MCM6|NUP88|PCNA|POLD1|POLD2|PSMA6|PSMB4|PSMB8|PSMB10|PSMD4|PSME2|RAN|RANGAP1|RFC2|RPA2|UBE2I|RAE1|SMC2|NUDC|NUP50|MAPRE1|LEMD3|CHMP4A|RCC2|CHMP4B|LEMD2	-2.6
Reactome Gene Sets	6	R-HSA-69278	GC-NL	Cell Cycle, Mitotic	-3	1.8	3.5	30286	561	1076	35	3.3	0.54	983|1104|1783|2237|3326|4001|4067|4171|4173|4174|4175|5048|5111|5424|5695|5704|5901|5981|5982|5984|6233|7175|7329|8086|8243|8480|10121|10592|10726|23592|53371|54107|55920|84617|203068	CDK1|RCC1|DYNC1LI2|FEN1|HSP90AB1|LMNB1|LYN|MCM2|MCM4|MCM5|MCM6|PAFAH1B1|PCNA|POLD1|PSMB7|PSMC4|RAN|RFC1|RFC2|RFC4|RPS27A|TPR|UBE2I|AAAS|SMC1A|RAE1|ACTR1A|SMC2|NUDC|LEMD3|NUP54|POLE3|RCC2|TUBB6|TUBB	-2.1
Reactome Gene Sets	6	R-HSA-69278	EGC-L	Cell Cycle, Mitotic	-8.9	2.4	7	30286	561	1217	55	4.5	0.6	983|1104|1783|2237|3320|3326|3837|4001|4067|4171|4173|4174|4175|4927|5048|5108|5111|5424|5425|5577|5696|5699|5704|5710|5721|5901|5903|5905|5982|5984|6117|6119|7112|7175|7329|8086|8243|8480|9126|10121|10382|10592|10726|10762|22919|23592|53371|54107|55920|81027|84617|128312|128866|203068|221496	CDK1|RCC1|DYNC1LI2|FEN1|HSP90AA1|HSP90AB1|KPNB1|LMNB1|LYN|MCM2|MCM4|MCM5|MCM6|NUP88|PAFAH1B1|PCM1|PCNA|POLD1|POLD2|PRKAR2B|PSMB8|PSMB10|PSMC4|PSMD4|PSME2|RAN|RANBP2|RANGAP1|RFC2|RFC4|RPA1|RPA3|TMPO|TPR|UBE2I|AAAS|SMC1A|RAE1|SMC3|ACTR1A|TUBB4A|SMC2|NUDC|NUP50|MAPRE1|LEMD3|NUP54|POLE3|RCC2|TUBB1|TUBB6|H2BC26|CHMP4B|TUBB|LEMD2	-7.6
Reactome Gene Sets	6	R-HSA-9664424	IM-LGD-L	Cell recruitment (pro-inflammatory response)	-4.8	8.1	6.7	30286	26	1012	7	0.69	0.26	718|834|3162|3606|4790|10910|29108	C3|CASP1|HMOX1|IL18|NFKB1|SUGT1|PYCARD	-3.9
Reactome Gene Sets	6	R-HSA-9664424	GASTRITIS	Cell recruitment (pro-inflammatory response)	-3.5	8	5.6	30286	26	724	5	0.69	0.31	3162|3326|4907|29108|79792	HMOX1|HSP90AB1|NT5E|PYCARD|GSDMD	-2.8
Reactome Gene Sets	6	R-HSA-9664424	GC-NL	Cell recruitment (pro-inflammatory response)	-3.6	6.5	5.4	30286	26	1076	6	0.56	0.23	718|3162|3326|3606|10910|29108	C3|HMOX1|HSP90AB1|IL18|SUGT1|PYCARD	-2.5
Reactome Gene Sets	6	R-HSA-9664424	EGC-L	Cell recruitment (pro-inflammatory response)	-3.3	5.7	5	30286	26	1217	6	0.49	0.2	718|3326|3606|4907|10910|29108	C3|HSP90AB1|IL18|NT5E|SUGT1|PYCARD	-2.7
Reactome Gene Sets	6	R-HSA-202733	GC-NL	Cell surface interactions at the vascular wall	-2.9	2.7	3.8	30286	137	1076	13	1.2	0.33	338|960|2147|3678|3684|3685|3689|4067|4072|5627|5777|7525|10544	APOB|CD44|F2|ITGA5|ITGAM|ITGAV|ITGB2|LYN|EPCAM|PROS1|PTPN6|YES1|PROCR	-2
Reactome Gene Sets	6	R-HSA-202733	IM-LGD-NL	Cell surface interactions at the vascular wall	-2.4	4	3.7	30286	137	333	6	1.8	0.73	3512|3684|3689|4072|5777|10544	JCHAIN|ITGAM|ITGB2|EPCAM|PTPN6|PROCR	-1.6
Reactome Gene Sets	6	R-HSA-202733	EGC-L	Cell surface interactions at the vascular wall	-2	2.2	2.8	30286	137	1217	12	0.99	0.28	338|960|1277|3655|3684|3689|4067|4072|4282|5627|5777|10544	APOB|CD44|COL1A1|ITGA6|ITGAM|ITGB2|LYN|EPCAM|MIF|PROS1|PTPN6|PROCR	-1.7
Reactome Gene Sets	6	R-HSA-202733	IM-LGD-L	Cell surface interactions at the vascular wall	-3.2	2.8	4	30286	137	1012	13	1.3	0.35	338|960|2147|3512|3655|3684|3689|4067|4072|4893|5627|5777|8140	APOB|CD44|F2|JCHAIN|ITGA6|ITGAM|ITGB2|LYN|EPCAM|NRAS|PROS1|PTPN6|SLC7A5	-2.6
Reactome Gene Sets	6	R-HSA-9711123	GASTRITIS	Cellular response to chemical stress	-9.3	4.7	8.5	30286	215	724	24	3.3	0.67	1327|1329|1345|1350|1536|2940|3162|3163|4513|4697|5694|5695|5696|5699|5721|6341|6834|7415|9167|9377|10128|10935|25824|51204	COX4I1|COX5B|COX6C|COX7C|CYBB|GSTA3|HMOX1|HMOX2|COX2|NDUFA4|PSMB6|PSMB7|PSMB8|PSMB10|PSME2|SCO1|SURF1|VCP|COX7A2L|COX5A|LRPPRC|PRDX3|PRDX5|TACO1	-8
Reactome Gene Sets	6	R-HSA-9711123	IM-LGD-L	Cellular response to chemical stress	-9.7	4	8.3	30286	215	1012	29	2.9	0.52	1327|1329|1337|1340|1345|1350|2168|3162|4513|4697|4790|5687|5692|5696|5699|5710|5721|6341|6834|8878|9167|9377|9997|10128|10498|10587|10935|25824|51204	COX4I1|COX5B|COX6A1|COX6B1|COX6C|COX7C|FABP1|HMOX1|COX2|NDUFA4|NFKB1|PSMA6|PSMB4|PSMB8|PSMB10|PSMD4|PSME2|SCO1|SURF1|SQSTM1|COX7A2L|COX5A|SCO2|LRPPRC|CARM1|TXNRD2|PRDX3|PRDX5|TACO1	-8.3
Reactome Gene Sets	6	R-HSA-9711123	GC-NL	Cellular response to chemical stress	-8.5	3.7	7.5	30286	215	1076	28	2.6	0.49	318|644|1327|1329|1340|1345|1350|1536|2168|3162|3163|4513|4697|5580|5695|5704|6233|6341|6834|9167|9377|9997|10061|10498|10587|10935|25824|51204	NUDT2|BLVRA|COX4I1|COX5B|COX6B1|COX6C|COX7C|CYBB|FABP1|HMOX1|HMOX2|COX2|NDUFA4|PRKCD|PSMB7|PSMC4|RPS27A|SCO1|SURF1|COX7A2L|COX5A|SCO2|ABCF2|CARM1|TXNRD2|PRDX3|PRDX5|TACO1	-6.7
Reactome Gene Sets	6	R-HSA-9711123	EGC-L	Cellular response to chemical stress	-8.5	3.5	7.4	30286	215	1217	30	2.5	0.44	1327|1329|1340|1345|1350|1536|2940|3163|4513|4697|5226|5580|5696|5699|5704|5710|5721|6341|6834|6888|8878|9167|9377|9588|9997|10061|10498|10587|25824|79718	COX4I1|COX5B|COX6B1|COX6C|COX7C|CYBB|GSTA3|HMOX2|COX2|NDUFA4|PGD|PRKCD|PSMB8|PSMB10|PSMC4|PSMD4|PSME2|SCO1|SURF1|TALDO1|SQSTM1|COX7A2L|COX5A|PRDX6|SCO2|ABCF2|CARM1|TXNRD2|PRDX5|TBL1XR1	-7.2
Reactome Gene Sets	6	R-HSA-9711123	GC-L	Cellular response to chemical stress	-5.2	5	6.3	30286	215	336	12	3.6	1	1327|1345|1350|2168|4513|5696|5699|5721|6341|6834|8878|25824	COX4I1|COX6C|COX7C|FABP1|COX2|PSMB8|PSMB10|PSME2|SCO1|SURF1|SQSTM1|PRDX5	-4.3
Reactome Gene Sets	6	R-HSA-9711123	IM-LGD-NL	Cellular response to chemical stress	-3.2	3.8	4.4	30286	215	333	9	2.7	0.89	1327|1345|1536|2940|4513|7353|9377|10935|25824	COX4I1|COX6C|CYBB|GSTA3|COX2|UFD1|COX5A|PRDX3|PRDX5	-2.2
Reactome Gene Sets	6	R-HSA-3371556	EGC-L	Cellular response to heat stress	-7.9	5	7.8	30286	89	1217	18	1.5	0.35	2288|2475|3312|3320|3326|4927|5903|6117|6119|7175|8086|8480|10728|10762|22824|51182|53371|57805	FKBP4|MTOR|HSPA8|HSP90AA1|HSP90AB1|NUP88|RANBP2|RPA1|RPA3|TPR|AAAS|RAE1|PTGES3|NUP50|HSPA4L|HSPA14|NUP54|CCAR2	-6.6
Reactome Gene Sets	6	R-HSA-3371556	GASTRITIS	Cellular response to heat stress	-4.3	4.7	5.5	30286	89	724	10	1.4	0.43	472|3309|3320|3326|6117|7175|7415|8480|9261|10728	ATM|HSPA5|HSP90AA1|HSP90AB1|RPA1|TPR|VCP|RAE1|MAPKAPK2|PTGES3	-3.5
Reactome Gene Sets	6	R-HSA-3371556	IM-LGD-L	Cellular response to heat stress	-4.4	4	5.3	30286	89	1012	12	1.2	0.34	472|2475|3312|3313|3320|4927|6118|6782|8480|10728|10762|51182	ATM|MTOR|HSPA8|HSPA9|HSP90AA1|NUP88|RPA2|HSPA13|RAE1|PTGES3|NUP50|HSPA14	-3.6
Reactome Gene Sets	6	R-HSA-1234174	GC-L	Cellular response to hypoxia	-2.8	6	4.6	30286	75	336	5	1.5	0.66	768|5696|5699|5721|7323	CA9|PSMB8|PSMB10|PSME2|UBE2D3	-2.3
Reactome Gene Sets	6	R-HSA-1234174	GASTRITIS	Cellular response to hypoxia	-2.7	3.9	3.9	30286	75	724	7	0.97	0.36	768|5694|5695|5696|5699|5721|8994	CA9|PSMB6|PSMB7|PSMB8|PSMB10|PSME2|LIMD1	-2.2
Reactome Gene Sets	6	R-HSA-1234174	EGC-L	Cellular response to hypoxia	-2.5	3	3.5	30286	75	1217	9	0.74	0.25	768|5696|5699|5704|5710|5721|6923|7323|25994	CA9|PSMB8|PSMB10|PSMC4|PSMD4|PSME2|ELOB|UBE2D3|HIGD1A	-2.1
Reactome Gene Sets	6	R-HSA-1234174	IM-LGD-L	Cellular response to hypoxia	-2.5	3.2	3.5	30286	75	1012	8	0.79	0.28	768|5687|5692|5696|5699|5710|5721|25994	CA9|PSMA6|PSMB4|PSMB8|PSMB10|PSMD4|PSME2|HIGD1A	-2
Reactome Gene Sets	6	R-HSA-9711097	EGC-L	Cellular response to starvation	-2.8	2.4	3.5	30286	157	1217	15	1.2	0.32	1968|2475|4736|6122|6134|6135|6136|6139|6146|6188|6193|6210|6231|8894|23521	EIF2S3|MTOR|RPL10A|RPL3|RPL10|RPL11|RPL12|RPL17|RPL22|RPS3|RPS5|RPS15A|RPS26|EIF2S2|RPL13A	-2.3
Reactome Gene Sets	6	R-HSA-9711097	GC-NL	Cellular response to starvation	-2.4	2.3	3.2	30286	157	1076	13	1.2	0.33	2197|4736|6146|6169|6170|6193|6209|6210|6233|6235|9349|23521|54468	FAU|RPL10A|RPL22|RPL38|RPL39|RPS5|RPS15|RPS15A|RPS27A|RPS29|RPL23|RPL13A|MIOS	-1.6
Reactome Gene Sets	6	R-HSA-2559583	EGC-NL	Cellular Senescence	-2.1	5.2	3.7	30286	195	120	4	3.3	1.6	6195|10111|23043|54386	RPS6KA1|RAD50|TNIK|TERF2IP	-1.4
Reactome Gene Sets	6	R-HSA-380287	EGC-L	Centrosome maturation	-2.3	2.7	3.2	30286	82	1217	9	0.74	0.25	983|3320|5048|5108|5577|10121|10382|22919|203068	CDK1|HSP90AA1|PAFAH1B1|PCM1|PRKAR2B|ACTR1A|TUBB4A|MAPRE1|TUBB	-1.9
Reactome Gene Sets	6	R-HSA-9613829	GASTRITIS	Chaperone Mediated Autophagy	-2.8	7.6	4.9	30286	22	724	4	0.55	0.28	2670|3320|3326|7431	GFAP|HSP90AA1|HSP90AB1|VIM	-2.3
Reactome Gene Sets	6	R-HSA-9613829	EGC-L	Chaperone Mediated Autophagy	-3.7	6.8	5.6	30286	22	1217	6	0.49	0.2	2670|3312|3320|3326|6035|7431	GFAP|HSPA8|HSP90AA1|HSP90AB1|RNASE1|VIM	-3.1
Reactome Gene Sets	6	R-HSA-9613829	GC-NL	Chaperone Mediated Autophagy	-3	6.4	4.9	30286	22	1076	5	0.46	0.21	2670|3326|6035|6233|7431	GFAP|HSP90AB1|RNASE1|RPS27A|VIM	-2.1
Reactome Gene Sets	6	R-HSA-390466	EGC-L	Chaperonin-mediated protein folding	-8.6	5.3	8.3	30286	90	1217	19	1.6	0.36	2767|2776|2788|5201|5202|6499|10382|10471|10528|10564|10575|10694|22803|22948|26985|54331|55970|81027|84617	GNA11|GNAQ|GNG7|PFDN1|PFDN2|SKIC2|TUBB4A|PFDN6|NOP56|ARFGEF2|CCT4|CCT8|XRN2|CCT5|AP3M1|GNG2|GNG12|TUBB1|TUBB6	-7.3
Reactome Gene Sets	6	R-HSA-447041	IM-LGD-L	CHL1 interactions	-2.6	10	5	30286	9	1012	3	0.3	0.17	3312|3672|3673	HSPA8|ITGA1|ITGA2	-2.1
Reactome Gene Sets	6	R-HSA-73886	GC-NL	Chromosome Maintenance	-2.4	2.4	3.2	30286	140	1076	12	1.1	0.32	2237|5111|5424|5434|5931|5981|5982|5984|8467|10856|54386|55505	FEN1|PCNA|POLD1|POLR2E|RBBP7|RFC1|RFC2|RFC4|SMARCA5|RUVBL2|TERF2IP|NOP10	-1.6
Reactome Gene Sets	6	R-HSA-73886	EGC-L	Chromosome Maintenance	-3.3	2.7	4	30286	140	1217	15	1.2	0.32	2237|5111|5424|5425|5434|5931|5982|5984|6117|6119|8607|10856|54386|55505|128312	FEN1|PCNA|POLD1|POLD2|POLR2E|RBBP7|RFC2|RFC4|RPA1|RPA3|RUVBL1|RUVBL2|TERF2IP|NOP10|H2BC26	-2.7
Reactome Gene Sets	6	R-HSA-8963888	GC-NL	Chylomicron assembly	-3.6	11	6.2	30286	10	1076	4	0.37	0.19	338|344|345|348	APOB|APOC2|APOC3|APOE	-2.5
Reactome Gene Sets	6	R-HSA-8963888	IM-LGD-L	Chylomicron assembly	-8.3	21	12	30286	10	1012	7	0.69	0.26	335|336|337|338|344|345|348	APOA1|APOA2|APOA4|APOB|APOC2|APOC3|APOE	-7
Reactome Gene Sets	6	R-HSA-8963888	EGC-L	Chylomicron assembly	-6.1	15	9	30286	10	1217	6	0.49	0.2	335|337|338|344|345|348	APOA1|APOA4|APOB|APOC2|APOC3|APOE	-5.1
Reactome Gene Sets	6	R-HSA-8963901	GC-NL	Chylomicron remodeling	-3.6	11	6.2	30286	10	1076	4	0.37	0.19	338|344|345|348	APOB|APOC2|APOC3|APOE	-2.5
Reactome Gene Sets	6	R-HSA-8963901	IM-LGD-L	Chylomicron remodeling	-8.3	21	12	30286	10	1012	7	0.69	0.26	335|336|337|338|344|345|348	APOA1|APOA2|APOA4|APOB|APOC2|APOC3|APOE	-7
Reactome Gene Sets	6	R-HSA-8963901	EGC-L	Chylomicron remodeling	-6.1	15	9	30286	10	1217	6	0.49	0.2	335|337|338|344|345|348	APOA1|APOA4|APOB|APOC2|APOC3|APOE	-5.1
Reactome Gene Sets	6	R-HSA-5617833	EGC-L	Cilium Assembly	-2.9	2.2	3.6	30286	201	1217	18	1.5	0.35	378|983|3320|5048|5108|5577|6102|10121|10382|10575|10694|22919|22948|55770|60412|81027|84617|203068	ARF4|CDK1|HSP90AA1|PAFAH1B1|PCM1|PRKAR2B|RP2|ACTR1A|TUBB4A|CCT4|CCT8|MAPRE1|CCT5|EXOC2|EXOC4|TUBB1|TUBB6|TUBB	-2.4
Reactome Gene Sets	6	R-HSA-71403	GASTRITIS	Citric acid cycle (TCA cycle)	-12	16	14	30286	34	724	13	1.8	0.49	38|50|1431|1743|2271|3418|4191|6390|8801|8802|8803|23530|92259	ACAT1|ACO2|CS|DLST|FH|IDH2|MDH2|SDHB|SUCLG2|SUCLG1|SUCLA2|NNT|KGD4	-11
Reactome Gene Sets	6	R-HSA-71403	GC-NL	Citric acid cycle (TCA cycle)	-14	13	14	30286	34	1076	16	1.5	0.37	38|50|1431|1743|2271|3418|3419|4191|6390|8801|8802|8803|23530|57128|92259|122961	ACAT1|ACO2|CS|DLST|FH|IDH2|IDH3A|MDH2|SDHB|SUCLG2|SUCLG1|SUCLA2|NNT|LYRM4|KGD4|ISCA2	-12
Reactome Gene Sets	6	R-HSA-71403	IM-LGD-L	Citric acid cycle (TCA cycle)	-12	12	12	30286	34	1012	14	1.4	0.37	38|50|1431|1743|2271|3418|4191|6390|8801|8802|8803|23530|92259|122961	ACAT1|ACO2|CS|DLST|FH|IDH2|MDH2|SDHB|SUCLG2|SUCLG1|SUCLA2|NNT|KGD4|ISCA2	-10
Reactome Gene Sets	6	R-HSA-71403	EGC-L	Citric acid cycle (TCA cycle)	-9.5	9.5	10	30286	34	1217	13	1.1	0.29	38|50|1431|1743|2271|3418|6390|8801|8802|8803|23530|92259|122961	ACAT1|ACO2|CS|DLST|FH|IDH2|SDHB|SUCLG2|SUCLG1|SUCLA2|NNT|KGD4|ISCA2	-8.2
Reactome Gene Sets	6	R-HSA-983169	GASTRITIS	Class I MHC mediated antigen processing & presentation	-5.7	2.9	5.7	30286	381	724	26	3.6	0.69	811|929|1514|1536|2923|3093|3106|3146|3309|4012|4360|5694|5695|5696|5699|5721|6279|6890|6892|7318|8139|8517|10484|51752|57674|151636	CALR|CD14|CTSL|CYBB|PDIA3|UBE2K|HLA-B|HMGB1|HSPA5|LNPEP|MRC1|PSMB6|PSMB7|PSMB8|PSMB10|PSME2|S100A8|TAP1|TAPBP|UBA7|GAN|IKBKG|SEC23A|ERAP1|RNF213|DTX3L	-4.7
Reactome Gene Sets	6	R-HSA-983169	GC-L	Class I MHC mediated antigen processing & presentation	-2.9	2.8	3.8	30286	381	336	12	3.6	1	3106|4012|5696|5699|5721|6279|6892|7323|8139|8517|55336|151636	HLA-B|LNPEP|PSMB8|PSMB10|PSME2|S100A8|TAPBP|UBE2D3|GAN|IKBKG|FBXL8|DTX3L	-2.4
Reactome Gene Sets	6	R-HSA-983169	EGC-L	Class I MHC mediated antigen processing & presentation	-2.8	1.8	3.3	30286	381	1217	28	2.3	0.43	929|1514|1536|2243|2244|3093|3106|3146|5696|5699|5704|5710|5721|6279|6280|6923|7064|7323|9354|9554|10134|10952|23480|25831|55336|55658|79876|151636	CD14|CTSL|CYBB|FGA|FGB|UBE2K|HLA-B|HMGB1|PSMB8|PSMB10|PSMC4|PSMD4|PSME2|S100A8|S100A9|ELOB|THOP1|UBE2D3|UBE4A|SEC22B|BCAP31|SEC61B|SEC61G|HECTD1|FBXL8|RNF126|UBA5|DTX3L	-2.3
Reactome Gene Sets	6	R-HSA-983169	IM-LGD-L	Class I MHC mediated antigen processing & presentation	-2.6	1.9	3.2	30286	381	1012	24	2.4	0.48	811|2243|2244|3106|4012|5687|5692|5696|5699|5710|5721|6279|9554|9871|10484|10802|10952|23480|55658|55905|63893|79654|79876|151636	CALR|FGA|FGB|HLA-B|LNPEP|PSMA6|PSMB4|PSMB8|PSMB10|PSMD4|PSME2|S100A8|SEC22B|SEC24D|SEC23A|SEC24A|SEC61B|SEC61G|RNF126|RNF114|UBE2O|HECTD3|UBA5|DTX3L	-2.1
Reactome Gene Sets	6	R-HSA-983169	GC-NL	Class I MHC mediated antigen processing & presentation	-2	1.7	2.6	30286	381	1076	23	2.1	0.44	929|1514|1536|2243|2244|3093|3106|3685|5289|5695|5704|6233|6279|6280|6892|7064|8517|8673|9902|10484|25831|55336|151636	CD14|CTSL|CYBB|FGA|FGB|UBE2K|HLA-B|ITGAV|PIK3C3|PSMB7|PSMC4|RPS27A|S100A8|S100A9|TAPBP|THOP1|IKBKG|VAMP8|MRC2|SEC23A|HECTD1|FBXL8|DTX3L	-1.3
Reactome Gene Sets	6	R-HSA-173623	IM-LGD-L	Classical antibody-mediated complement activation	-4.8	20	8.6	30286	6	1012	4	0.4	0.2	713|714|715|716	C1QB|C1QC|C1R|C1S	-3.9
Reactome Gene Sets	6	R-HSA-173623	GC-NL	Classical antibody-mediated complement activation	-4.6	19	8.4	30286	6	1076	4	0.37	0.19	713|714|715|716	C1QB|C1QC|C1R|C1S	-3.3
Reactome Gene Sets	6	R-HSA-173623	EGC-L	Classical antibody-mediated complement activation	-4.4	17	7.8	30286	6	1217	4	0.33	0.16	713|714|715|716	C1QB|C1QC|C1R|C1S	-3.6
Reactome Gene Sets	6	R-HSA-173623	IM-LGD-NL	Classical antibody-mediated complement activation	-6.7	61	15	30286	6	333	4	1.2	0.6	713|714|715|716	C1QB|C1QC|C1R|C1S	-5.1
Reactome Gene Sets	6	R-HSA-8856828	GC-NL	Clathrin-mediated endocytosis	-5.3	3.5	5.7	30286	146	1076	18	1.7	0.39	156|338|867|1173|1213|3267|6233|6455|6844|7037|8027|8673|9026|10552|11252|29978|30011|51138	GRK2|APOB|CBL|AP2M1|CLTC|AGFG1|RPS27A|SH3GL1|VAMP2|TFRC|STAM|VAMP8|HIP1R|ARPC1A|PACSIN2|UBQLN2|SH3KBP1|COPS4	-3.9
Reactome Gene Sets	6	R-HSA-8856828	EGC-L	Clathrin-mediated endocytosis	-4.6	3.1	5.1	30286	146	1217	18	1.5	0.35	156|338|867|1173|2060|3267|3312|5869|6455|6844|7018|7037|8027|9026|10552|11252|29978|30011	GRK2|APOB|CBL|AP2M1|EPS15|AGFG1|HSPA8|RAB5B|SH3GL1|VAMP2|TF|TFRC|STAM|HIP1R|ARPC1A|PACSIN2|UBQLN2|SH3KBP1	-3.8
Reactome Gene Sets	6	R-HSA-8856828	GASTRITIS	Clathrin-mediated endocytosis	-2.6	2.9	3.5	30286	146	724	10	1.4	0.43	156|867|1956|6456|7037|8027|8976|9026|23048|30011	GRK2|CBL|EGFR|SH3GL2|TFRC|STAM|WASL|HIP1R|FNBP1|SH3KBP1	-2.1
Reactome Gene Sets	6	R-HSA-8856828	IM-LGD-L	Clathrin-mediated endocytosis	-7	4.1	7	30286	146	1012	20	2	0.44	156|338|382|950|3267|3312|5868|5878|6844|7018|7037|8027|8976|9026|10109|10552|11252|22848|27348|30011	GRK2|APOB|ARF6|SCARB2|AGFG1|HSPA8|RAB5A|RAB5C|VAMP2|TF|TFRC|STAM|WASL|HIP1R|ARPC2|ARPC1A|PACSIN2|AAK1|TOR1B|SH3KBP1	-5.9
Reactome Gene Sets	6	R-HSA-5607764	GASTRITIS	CLEC7A (Dectin-1) signaling	-3.1	3.7	4.3	30286	101	724	9	1.2	0.41	5336|5532|5694|5695|5696|5699|5721|8517|29108	PLCG2|PPP3CB|PSMB6|PSMB7|PSMB8|PSMB10|PSME2|IKBKG|PYCARD	-2.6
Reactome Gene Sets	6	R-HSA-5607764	GC-L	CLEC7A (Dectin-1) signaling	-2.3	4.5	3.7	30286	101	336	5	1.5	0.66	5696|5699|5721|8517|29108	PSMB8|PSMB10|PSME2|IKBKG|PYCARD	-1.9
Reactome Gene Sets	6	R-HSA-1650814	EGC-L	Collagen biosynthesis and modifying enzymes	-4.2	4.1	5.2	30286	67	1217	11	0.9	0.27	871|1277|1291|1292|1303|5351|5352|8974|8985|64175|79709	SERPINH1|COL1A1|COL6A1|COL6A2|COL12A1|PLOD1|PLOD2|P4HA2|PLOD3|P3H1|COLGALT1	-3.4
Reactome Gene Sets	6	R-HSA-1650814	GASTRITIS	Collagen biosynthesis and modifying enzymes	-3	4.4	4.3	30286	67	724	7	0.97	0.36	871|1291|1292|5479|8985|79709|340267	SERPINH1|COL6A1|COL6A2|PPIB|PLOD3|COLGALT1|COL28A1	-2.4
Reactome Gene Sets	6	R-HSA-1650814	IM-LGD-NL	Collagen biosynthesis and modifying enzymes	-3.1	6.8	5	30286	67	333	5	1.5	0.67	871|1291|1292|79709|340267	SERPINH1|COL6A1|COL6A2|COLGALT1|COL28A1	-2.1
Reactome Gene Sets	6	R-HSA-1650814	IM-LGD-L	Collagen biosynthesis and modifying enzymes	-2.2	3.1	3.2	30286	67	1012	7	0.69	0.26	871|1306|5351|5479|8974|8985|79709	SERPINH1|COL15A1|PLOD1|PPIB|P4HA2|PLOD3|COLGALT1	-1.8
Reactome Gene Sets	6	R-HSA-1650814	GC-NL	Collagen biosynthesis and modifying enzymes	-3.9	4.2	5	30286	67	1076	10	0.93	0.29	871|1291|1292|1303|5351|5352|8974|8985|64175|79709	SERPINH1|COL6A1|COL6A2|COL12A1|PLOD1|PLOD2|P4HA2|PLOD3|P3H1|COLGALT1	-2.8
Reactome Gene Sets	6	R-HSA-1442490	EGC-L	Collagen degradation	-3	3.5	4.1	30286	64	1217	9	0.74	0.25	1277|1291|1292|1303|1508|1514|1991|4318|85007	COL1A1|COL6A1|COL6A2|COL12A1|CTSB|CTSL|ELANE|MMP9|PHYKPL	-2.5
Reactome Gene Sets	6	R-HSA-1442490	GC-NL	Collagen degradation	-2.7	3.5	3.9	30286	64	1076	8	0.74	0.26	1291|1292|1303|1508|1514|1991|4313|4318	COL6A1|COL6A2|COL12A1|CTSB|CTSL|ELANE|MMP2|MMP9	-1.9
Reactome Gene Sets	6	R-HSA-1474290	GC-NL	Collagen formation	-7	5	7.3	30286	90	1076	16	1.5	0.37	871|1291|1292|1303|1508|1514|3914|4318|5339|5351|5352|7837|8974|8985|64175|79709	SERPINH1|COL6A1|COL6A2|COL12A1|CTSB|CTSL|LAMB3|MMP9|PLEC|PLOD1|PLOD2|PXDN|P4HA2|PLOD3|P3H1|COLGALT1	-5.3
Reactome Gene Sets	6	R-HSA-1474290	EGC-L	Collagen formation	-7	4.7	7.2	30286	90	1217	17	1.4	0.34	871|1277|1291|1292|1303|1508|1514|3655|3914|4318|5339|5351|5352|8974|8985|64175|79709	SERPINH1|COL1A1|COL6A1|COL6A2|COL12A1|CTSB|CTSL|ITGA6|LAMB3|MMP9|PLEC|PLOD1|PLOD2|P4HA2|PLOD3|P3H1|COLGALT1	-5.9
Reactome Gene Sets	6	R-HSA-1474290	GASTRITIS	Collagen formation	-3.5	4.2	4.7	30286	90	724	9	1.2	0.41	871|1291|1292|1508|1514|5479|8985|79709|340267	SERPINH1|COL6A1|COL6A2|CTSB|CTSL|PPIB|PLOD3|COLGALT1|COL28A1	-2.9
Reactome Gene Sets	6	R-HSA-1474290	IM-LGD-L	Collagen formation	-4.3	4	5.3	30286	90	1012	12	1.2	0.34	871|977|1306|1508|3655|3914|5339|5351|5479|8974|8985|79709	SERPINH1|CD151|COL15A1|CTSB|ITGA6|LAMB3|PLEC|PLOD1|PPIB|P4HA2|PLOD3|COLGALT1	-3.5
Reactome Gene Sets	6	R-HSA-1474290	IM-LGD-NL	Collagen formation	-3.3	6.1	5.1	30286	90	333	6	1.8	0.73	871|1291|1292|1508|79709|340267	SERPINH1|COL6A1|COL6A2|CTSB|COLGALT1|COL28A1	-2.3
Reactome Gene Sets	6	R-HSA-140875	IM-LGD-L	Common Pathway of Fibrin Clot Formation	-5.3	9.5	7.4	30286	22	1012	7	0.69	0.26	2147|2165|2243|2244|3053|5627|5657	F2|F13B|FGA|FGB|SERPIND1|PROS1|PRTN3	-4.3
Reactome Gene Sets	6	R-HSA-140875	GC-NL	Common Pathway of Fibrin Clot Formation	-5.1	9	7.2	30286	22	1076	7	0.65	0.25	2147|2165|2243|2244|5627|5657|10544	F2|F13B|FGA|FGB|PROS1|PRTN3|PROCR	-3.7
Reactome Gene Sets	6	R-HSA-140875	EGC-L	Common Pathway of Fibrin Clot Formation	-4.8	7.9	6.6	30286	22	1217	7	0.58	0.22	2162|2165|2243|2244|5627|5657|10544	F13A1|F13B|FGA|FGB|PROS1|PRTN3|PROCR	-3.9
Reactome Gene Sets	6	R-HSA-166658	GASTRITIS	Complement cascade	-3.3	5	4.8	30286	58	724	7	0.97	0.36	713|714|721|732|966|1991|3426	C1QB|C1QC|C4B|C8B|CD59|ELANE|CFI	-2.7
Reactome Gene Sets	6	R-HSA-166658	IM-LGD-NL	Complement cascade	-5.5	11	8	30286	58	333	7	2.1	0.79	713|714|715|716|722|4179|7448	C1QB|C1QC|C1R|C1S|C4BPA|CD46|VTN	-4
Reactome Gene Sets	6	R-HSA-166658	IM-LGD-L	Complement cascade	-21	13	17	30286	58	1012	25	2.5	0.49	629|710|713|714|715|716|718|721|722|729|730|731|732|733|735|1191|1370|1991|2147|3075|3080|3426|5199|5627|7448	CFB|SERPING1|C1QB|C1QC|C1R|C1S|C3|C4B|C4BPA|C6|C7|C8A|C8B|C8G|C9|CLU|CPN2|ELANE|F2|CFH|CFHR2|CFI|CFP|PROS1|VTN	-19
Reactome Gene Sets	6	R-HSA-166658	GC-NL	Complement cascade	-18	11	15	30286	58	1076	23	2.1	0.44	629|710|713|714|715|716|718|722|729|730|731|733|735|966|1370|1991|2147|3075|3078|3426|5199|5627|7448	CFB|SERPING1|C1QB|C1QC|C1R|C1S|C3|C4BPA|C6|C7|C8A|C8G|C9|CD59|CPN2|ELANE|F2|CFH|CFHR1|CFI|CFP|PROS1|VTN	-16
Reactome Gene Sets	6	R-HSA-166658	EGC-L	Complement cascade	-13	8.6	12	30286	58	1217	20	1.6	0.36	629|710|713|714|715|716|718|722|729|730|735|966|1370|1991|3075|3078|3426|5199|5627|7448	CFB|SERPING1|C1QB|C1QC|C1R|C1S|C3|C4BPA|C6|C7|C9|CD59|CPN2|ELANE|CFH|CFHR1|CFI|CFP|PROS1|VTN	-12
Reactome Gene Sets	6	R-HSA-6799198	GC-L	Complex I biogenesis	-6.7	13	9.3	30286	57	336	8	2.4	0.83	4698|4704|4709|4712|4714|4718|4720|4722	NDUFA5|NDUFA9|NDUFB3|NDUFB6|NDUFB8|NDUFC2|NDUFS2|NDUFS3	-5.5
Reactome Gene Sets	6	R-HSA-6799198	GASTRITIS	Complex I biogenesis	-21	16	18	30286	57	724	22	3	0.64	4698|4700|4701|4702|4704|4705|4707|4709|4713|4714|4715|4716|4718|4720|4722|4723|4724|4725|4726|4728|4729|126328	NDUFA5|NDUFA6|NDUFA7|NDUFA8|NDUFA9|NDUFA10|NDUFB1|NDUFB3|NDUFB7|NDUFB8|NDUFB9|NDUFB10|NDUFC2|NDUFS2|NDUFS3|NDUFV1|NDUFS4|NDUFS5|NDUFS6|NDUFS8|NDUFV2|NDUFA11	-19
Reactome Gene Sets	6	R-HSA-6799198	IM-LGD-NL	Complex I biogenesis	-23	30	23	30286	57	333	19	5.7	1.3	4700|4701|4702|4704|4707|4709|4714|4715|4716|4720|4722|4723|4724|4725|4726|4729|4731|28976|126328	NDUFA6|NDUFA7|NDUFA8|NDUFA9|NDUFB1|NDUFB3|NDUFB8|NDUFB9|NDUFB10|NDUFS2|NDUFS3|NDUFV1|NDUFS4|NDUFS5|NDUFS6|NDUFV2|NDUFV3|ACAD9|NDUFA11	-20
Reactome Gene Sets	6	R-HSA-6799198	IM-LGD-L	Complex I biogenesis	-27	15	20	30286	57	1012	29	2.9	0.52	4694|4695|4698|4700|4701|4702|4704|4705|4707|4709|4712|4713|4714|4715|4716|4718|4720|4722|4723|4724|4725|4726|4728|4729|28976|55967|79133|126328|374291	NDUFA1|NDUFA2|NDUFA5|NDUFA6|NDUFA7|NDUFA8|NDUFA9|NDUFA10|NDUFB1|NDUFB3|NDUFB6|NDUFB7|NDUFB8|NDUFB9|NDUFB10|NDUFC2|NDUFS2|NDUFS3|NDUFV1|NDUFS4|NDUFS5|NDUFS6|NDUFS8|NDUFV2|ACAD9|NDUFA12|NDUFAF5|NDUFA11|NDUFS7	-25
Reactome Gene Sets	6	R-HSA-6799198	GC-NL	Complex I biogenesis	-25	14	19	30286	57	1076	28	2.6	0.49	4694|4695|4698|4700|4701|4702|4704|4705|4707|4709|4713|4714|4715|4716|4718|4720|4722|4723|4724|4725|4726|4728|4729|28976|29078|55967|79133|126328	NDUFA1|NDUFA2|NDUFA5|NDUFA6|NDUFA7|NDUFA8|NDUFA9|NDUFA10|NDUFB1|NDUFB3|NDUFB7|NDUFB8|NDUFB9|NDUFB10|NDUFC2|NDUFS2|NDUFS3|NDUFV1|NDUFS4|NDUFS5|NDUFS6|NDUFS8|NDUFV2|ACAD9|NDUFAF4|NDUFA12|NDUFAF5|NDUFA11	-23
Reactome Gene Sets	6	R-HSA-6799198	EGC-L	Complex I biogenesis	-25	13	18	30286	57	1217	29	2.4	0.44	4694|4695|4698|4700|4701|4702|4704|4705|4707|4709|4712|4713|4714|4715|4716|4718|4720|4722|4723|4724|4725|4726|4728|4729|4731|28976|55967|79133|126328	NDUFA1|NDUFA2|NDUFA5|NDUFA6|NDUFA7|NDUFA8|NDUFA9|NDUFA10|NDUFB1|NDUFB3|NDUFB6|NDUFB7|NDUFB8|NDUFB9|NDUFB10|NDUFC2|NDUFS2|NDUFS3|NDUFV1|NDUFS4|NDUFS5|NDUFS6|NDUFS8|NDUFV2|NDUFV3|ACAD9|NDUFA12|NDUFAF5|NDUFA11	-23
Reactome Gene Sets	6	R-HSA-5637810	GASTRITIS	Constitutive Signaling by EGFRvIII	-2.3	8.4	4.5	30286	15	724	3	0.41	0.24	867|1956|3320	CBL|EGFR|HSP90AA1	-1.9
Reactome Gene Sets	6	R-HSA-1236382	GASTRITIS	Constitutive Signaling by Ligand-Responsive EGFR Cancer Variants	-2	6.6	3.8	30286	19	724	3	0.41	0.24	867|1956|3320	CBL|EGFR|HSP90AA1	-1.7
Reactome Gene Sets	6	R-HSA-9634285	IM-LGD-L	Constitutive Signaling by Overexpressed ERBB2	-2.3	8.2	4.4	30286	11	1012	3	0.3	0.17	3320|4893|11140	HSP90AA1|NRAS|CDC37	-1.9
Reactome Gene Sets	6	R-HSA-6814122	EGC-L	Cooperation of PDCL (PhLP1) and TRiC/CCT in G-protein beta folding	-4	5.2	5.4	30286	38	1217	8	0.66	0.23	2767|2776|2788|10575|10694|22948|54331|55970	GNA11|GNAQ|GNG7|CCT4|CCT8|CCT5|GNG2|GNG12	-3.2
Reactome Gene Sets	6	R-HSA-6814122	IM-LGD-NL	Cooperation of PDCL (PhLP1) and TRiC/CCT in G-protein beta folding	-2.1	7.2	4	30286	38	333	3	0.9	0.52	2767|2776|55970	GNA11|GNAQ|GNG12	-1.3
Reactome Gene Sets	6	R-HSA-389958	EGC-L	Cooperation of Prefoldin and TriC/CCT in actin and tubulin folding	-5.5	7	6.9	30286	32	1217	9	0.74	0.25	5201|5202|10382|10471|10575|10694|22948|81027|84617	PFDN1|PFDN2|TUBB4A|PFDN6|CCT4|CCT8|CCT5|TUBB1|TUBB6	-4.5
Reactome Gene Sets	6	R-HSA-6811434	EGC-L	COPI-dependent Golgi-to-ER retrograde traffic	-3.8	3.3	4.6	30286	99	1217	13	1.1	0.29	378|381|9554|10382|10972|23423|26958|51594|53407|54732|55850|81027|84617	ARF4|ARF5|SEC22B|TUBB4A|TMED10|TMED3|COPG2|NBAS|STX18|TMED9|USE1|TUBB1|TUBB6	-3.1
Reactome Gene Sets	6	R-HSA-204005	IM-LGD-L	COPII-mediated vesicle transport	-4.8	4.8	5.9	30286	68	1012	11	1.1	0.33	1075|1522|3998|5265|9554|9871|10113|10484|10802|10972|22870	CTSC|CTSZ|LMAN1|SERPINA1|SEC22B|SEC24D|PREB|SEC23A|SEC24A|TMED10|PPP6R1	-3.9
Reactome Gene Sets	6	R-HSA-204005	EGC-L	COPII-mediated vesicle transport	-3.4	3.7	4.5	30286	68	1217	10	0.82	0.26	966|1075|1522|3998|9554|10113|10960|10972|11196|23256	CD59|CTSC|CTSZ|LMAN1|SEC22B|PREB|LMAN2|TMED10|SEC23IP|SCFD1	-2.8
Reactome Gene Sets	6	R-HSA-6811436	EGC-L	COPI-independent Golgi-to-ER retrograde traffic	-4.5	4.9	5.7	30286	51	1217	10	0.82	0.26	829|1783|2590|5048|5050|10121|10382|55860|81027|84617	CAPZA1|DYNC1LI2|GALNT2|PAFAH1B1|PAFAH1B3|ACTR1A|TUBB4A|ACTR10|TUBB1|TUBB6	-3.7
Reactome Gene Sets	6	R-HSA-6811436	GC-NL	COPI-independent Golgi-to-ER retrograde traffic	-2	3.3	3.2	30286	51	1076	6	0.56	0.23	1783|2590|5048|10121|55860|84617	DYNC1LI2|GALNT2|PAFAH1B1|ACTR1A|ACTR10|TUBB6	-1.3
Reactome Gene Sets	6	R-HSA-6807878	EGC-L	COPI-mediated anterograde transport	-4.9	3.7	5.6	30286	101	1217	15	1.2	0.32	378|381|829|966|1783|10121|10382|10972|23423|26958|54732|55860|81027|84617|91949	ARF4|ARF5|CAPZA1|CD59|DYNC1LI2|ACTR1A|TUBB4A|TMED10|TMED3|COPG2|TMED9|ACTR10|TUBB1|TUBB6|COG7	-4
Reactome Gene Sets	6	R-HSA-6807878	GC-NL	COPI-mediated anterograde transport	-3	3.1	4	30286	101	1076	11	1	0.31	381|966|1783|10121|10466|54732|55860|83548|84342|84617|91949	ARF5|CD59|DYNC1LI2|ACTR1A|COG5|TMED9|ACTR10|COG3|COG8|TUBB6|COG7	-2.1
Reactome Gene Sets	6	R-HSA-388841	GASTRITIS	Costimulation by the CD28 family	-2.2	3.6	3.4	30286	69	724	6	0.83	0.34	1445|3115|3122|3123|4067|5777	CSK|HLA-DPB1|HLA-DRA|HLA-DRB1|LYN|PTPN6	-1.8
Reactome Gene Sets	6	R-HSA-388841	GC-NL	Costimulation by the CD28 family	-2.5	3.3	3.6	30286	69	1076	8	0.74	0.26	1445|3115|3122|3127|4067|5062|5777|7525	CSK|HLA-DPB1|HLA-DRA|HLA-DRB5|LYN|PAK2|PTPN6|YES1	-1.7
Reactome Gene Sets	6	R-HSA-388841	IM-LGD-NL	Costimulation by the CD28 family	-2.1	5.3	3.7	30286	69	333	4	1.2	0.6	1445|3115|3122|5777	CSK|HLA-DPB1|HLA-DRA|PTPN6	-1.4
Reactome Gene Sets	6	R-HSA-71288	GC-NL	Creatine metabolism	-3.4	10	5.9	30286	11	1076	4	0.37	0.19	1152|1160|2593|2628	CKB|CKMT2|GAMT|GATM	-2.3
Reactome Gene Sets	6	R-HSA-166786	IM-LGD-L	Creation of C4 and C2 activators	-3	8.6	5.3	30286	14	1012	4	0.4	0.2	713|714|715|716	C1QB|C1QC|C1R|C1S	-2.5
Reactome Gene Sets	6	R-HSA-166786	GC-NL	Creation of C4 and C2 activators	-2.9	8	5.1	30286	14	1076	4	0.37	0.19	713|714|715|716	C1QB|C1QC|C1R|C1S	-2
Reactome Gene Sets	6	R-HSA-166786	EGC-L	Creation of C4 and C2 activators	-2.7	7.1	4.7	30286	14	1217	4	0.33	0.16	713|714|715|716	C1QB|C1QC|C1R|C1S	-2.2
Reactome Gene Sets	6	R-HSA-166786	IM-LGD-NL	Creation of C4 and C2 activators	-4.9	26	9.9	30286	14	333	4	1.2	0.6	713|714|715|716	C1QB|C1QC|C1R|C1S	-3.5
Reactome Gene Sets	6	R-HSA-8949613	GASTRITIS	Cristae formation	-14	19	16	30286	31	724	14	1.9	0.51	506|513|514|515|522|539|4509|10632|10651|10989|25813|27109|84303|139322	ATP5F1B|ATP5F1D|ATP5F1E|ATP5PB|ATP5PF|ATP5PO|ATP8|ATP5MG|MTX2|IMMT|SAMM50|DMAC2L|CHCHD6|APOOL	-13
Reactome Gene Sets	6	R-HSA-8949613	GC-L	Cristae formation	-4.7	15	8	30286	31	336	5	1.5	0.66	515|4509|8834|25813|139322	ATP5PB|ATP8|TMEM11|SAMM50|APOOL	-3.8
Reactome Gene Sets	6	R-HSA-8949613	IM-LGD-L	Cristae formation	-22	19	19	30286	31	1012	20	2	0.44	506|513|514|515|521|522|539|3313|4509|4580|8834|10632|10651|10989|25813|27109|54927|84303|125988|139322	ATP5F1B|ATP5F1D|ATP5F1E|ATP5PB|ATP5ME|ATP5PF|ATP5PO|HSPA9|ATP8|MTX1|TMEM11|ATP5MG|MTX2|IMMT|SAMM50|DMAC2L|CHCHD3|CHCHD6|MICOS13|APOOL	-20
Reactome Gene Sets	6	R-HSA-8949613	GC-NL	Cristae formation	-18	16	16	30286	31	1076	18	1.7	0.39	506|513|514|515|521|522|539|4509|8834|10632|10651|10989|25813|27109|54927|84303|125988|139322	ATP5F1B|ATP5F1D|ATP5F1E|ATP5PB|ATP5ME|ATP5PF|ATP5PO|ATP8|TMEM11|ATP5MG|MTX2|IMMT|SAMM50|DMAC2L|CHCHD3|CHCHD6|MICOS13|APOOL	-16
Reactome Gene Sets	6	R-HSA-8949613	EGC-L	Cristae formation	-14	13	14	30286	31	1217	16	1.3	0.33	506|513|514|515|521|522|539|4509|8834|10632|10651|10989|25813|54927|84303|139322	ATP5F1B|ATP5F1D|ATP5F1E|ATP5PB|ATP5ME|ATP5PF|ATP5PO|ATP8|TMEM11|ATP5MG|MTX2|IMMT|SAMM50|CHCHD3|CHCHD6|APOOL	-12
Reactome Gene Sets	6	R-HSA-1236978	GASTRITIS	Cross-presentation of soluble exogenous antigens (endosomes)	-3	5.1	4.5	30286	49	724	6	0.83	0.34	4360|5694|5695|5696|5699|5721	MRC1|PSMB6|PSMB7|PSMB8|PSMB10|PSME2	-2.4
Reactome Gene Sets	6	R-HSA-1236978	IM-LGD-L	Cross-presentation of soluble exogenous antigens (endosomes)	-2.2	3.7	3.5	30286	49	1012	6	0.59	0.24	5687|5692|5696|5699|5710|5721	PSMA6|PSMB4|PSMB8|PSMB10|PSMD4|PSME2	-1.9
Reactome Gene Sets	6	R-HSA-5621481	GASTRITIS	C-type lectin receptors (CLRs)	-4.4	3.8	5.3	30286	143	724	13	1.8	0.49	3385|4067|4583|5336|5532|5694|5695|5696|5699|5721|8517|29108|56667	ICAM3|LYN|MUC2|PLCG2|PPP3CB|PSMB6|PSMB7|PSMB8|PSMB10|PSME2|IKBKG|PYCARD|MUC13	-3.6
Reactome Gene Sets	6	R-HSA-5621481	GC-L	C-type lectin receptors (CLRs)	-2.3	3.8	3.5	30286	143	336	6	1.8	0.72	3385|5696|5699|5721|8517|29108	ICAM3|PSMB8|PSMB10|PSME2|IKBKG|PYCARD	-1.9
Reactome Gene Sets	6	R-HSA-5621481	IM-LGD-L	C-type lectin receptors (CLRs)	-3	2.7	3.8	30286	143	1012	13	1.3	0.35	3385|4067|4583|4790|4893|5687|5692|5696|5699|5710|5721|29108|56667	ICAM3|LYN|MUC2|NFKB1|NRAS|PSMA6|PSMB4|PSMB8|PSMB10|PSMD4|PSME2|PYCARD|MUC13	-2.4
Reactome Gene Sets	6	R-HSA-5621481	GC-NL	C-type lectin receptors (CLRs)	-2.7	2.6	3.6	30286	143	1076	13	1.2	0.33	3385|4067|4583|4586|5062|5336|5580|5695|5704|6233|8517|29108|56667	ICAM3|LYN|MUC2|MUC5AC|PAK2|PLCG2|PRKCD|PSMB7|PSMC4|RPS27A|IKBKG|PYCARD|MUC13	-1.9
Reactome Gene Sets	6	R-HSA-5621481	EGC-L	C-type lectin receptors (CLRs)	-2.3	2.3	3.1	30286	143	1217	13	1.1	0.29	3385|4067|4583|4586|5062|5580|5696|5699|5704|5710|5721|29108|56667	ICAM3|LYN|MUC2|MUC5AC|PAK2|PRKCD|PSMB8|PSMB10|PSMC4|PSMD4|PSME2|PYCARD|MUC13	-1.9
Reactome Gene Sets	6	R-HSA-1280215	EGC-L	Cytokine Signaling in Immune system	-13	2.5	8.5	30286	786	1217	78	6.4	0.7	103|301|829|867|960|983|1445|1660|1968|1973|2162|2633|3106|3122|3123|3146|3185|3312|3320|3383|3430|3437|3606|3608|3684|3689|3837|3838|3936|4001|4067|4128|4282|4318|4478|4599|4927|4938|4940|5062|5580|5611|5657|5696|5699|5704|5710|5721|5770|5777|5903|6627|6844|6888|6923|7175|7323|7329|7431|7534|8086|8480|8878|8894|9049|9775|10379|10382|10762|23650|27250|53371|79671|81027|84617|121457|200081|552900	ADAR|ANXA1|CAPZA1|CBL|CD44|CDK1|CSK|DHX9|EIF2S3|EIF4A1|F13A1|GBP1|HLA-B|HLA-DRA|HLA-DRB1|HMGB1|HNRNPF|HSPA8|HSP90AA1|ICAM1|IFI35|IFIT3|IL18|ILF2|ITGAM|ITGB2|KPNB1|KPNA2|LCP1|LMNB1|LYN|MAOA|MIF|MMP9|MSN|MX1|NUP88|OAS1|OAS3|PAK2|PRKCD|DNAJC3|PRTN3|PSMB8|PSMB10|PSMC4|PSMD4|PSME2|PTPN1|PTPN6|RANBP2|SNRPA1|VAMP2|TALDO1|ELOB|TPR|UBE2D3|UBE2I|VIM|YWHAZ|AAAS|RAE1|SQSTM1|EIF2S2|AIP|EIF4A3|IRF9|TUBB4A|NUP5…	-11
Reactome Gene Sets	6	R-HSA-1280215	GASTRITIS	Cytokine Signaling in Immune system	-12	2.9	8.6	30286	786	724	55	7.6	0.98	103|301|829|867|960|983|1445|1973|2162|2185|2633|2634|3106|3115|3122|3123|3146|3162|3181|3320|3383|3662|3669|3689|3837|3936|4001|4067|4128|4478|4599|4938|5336|5657|5694|5695|5696|5699|5721|5770|5777|6283|7175|7184|7318|7329|7431|8480|8517|9049|9261|10379|23321|79792|84617	ADAR|ANXA1|CAPZA1|CBL|CD44|CDK1|CSK|EIF4A1|F13A1|PTK2B|GBP1|GBP2|HLA-B|HLA-DPB1|HLA-DRA|HLA-DRB1|HMGB1|HMOX1|HNRNPA2B1|HSP90AA1|ICAM1|IRF4|ISG20|ITGB2|KPNB1|LCP1|LMNB1|LYN|MAOA|MSN|MX1|OAS1|PLCG2|PRTN3|PSMB6|PSMB7|PSMB8|PSMB10|PSME2|PTPN1|PTPN6|S100A12|TPR|HSP90B1|UBA7|UBE2I|VIM|RAE1|IKBKG|AIP|MAPKAPK2|IRF9|TRIM2|GSDMD|TUBB6	-10
Reactome Gene Sets	6	R-HSA-1280215	GC-L	Cytokine Signaling in Immune system	-6.6	3.1	6.3	30286	786	336	27	8	1.5	960|2633|2634|3106|3115|3122|3430|3689|4128|4318|5657|5696|5699|5721|5770|5777|7323|8517|8878|9049|9261|10379|23321|23650|79671|121457|200081	CD44|GBP1|GBP2|HLA-B|HLA-DPB1|HLA-DRA|IFI35|ITGB2|MAOA|MMP9|PRTN3|PSMB8|PSMB10|PSME2|PTPN1|PTPN6|UBE2D3|IKBKG|SQSTM1|AIP|MAPKAPK2|IRF9|TRIM2|TRIM29|NLRX1|IKBIP|TXLNA	-5.5
Reactome Gene Sets	6	R-HSA-1280215	GC-NL	Cytokine Signaling in Immune system	-7.2	2.1	6.1	30286	786	1076	59	5.5	0.69	301|867|960|983|1265|1445|1660|2316|2633|2634|3106|3115|3122|3127|3162|3181|3383|3430|3606|3662|3684|3689|3716|3936|4001|4067|4128|4313|4318|4478|4904|5062|5336|5580|5657|5695|5704|5770|5777|6233|6627|6778|6844|7175|7329|7431|7525|8086|8480|8517|9049|23321|27250|53371|54472|79671|84617|121457|200081	ANXA1|CBL|CD44|CDK1|CNN2|CSK|DHX9|FLNA|GBP1|GBP2|HLA-B|HLA-DPB1|HLA-DRA|HLA-DRB5|HMOX1|HNRNPA2B1|ICAM1|IFI35|IL18|IRF4|ITGAM|ITGB2|JAK1|LCP1|LMNB1|LYN|MAOA|MMP2|MMP9|MSN|YBX1|PAK2|PLCG2|PRKCD|PRTN3|PSMB7|PSMC4|PTPN1|PTPN6|RPS27A|SNRPA1|STAT6|VAMP2|TPR|UBE2I|VIM|YES1|AAAS|RAE1|IKBKG|AIP|TRIM2|PDCD4|NUP54|TOLLIP|NLRX1|TUBB6|IKBIP|TXLNA	-5.5
Reactome Gene Sets	6	R-HSA-1280215	IM-LGD-L	Cytokine Signaling in Immune system	-5.9	2	5.4	30286	786	1012	53	5.2	0.7	301|834|960|1072|1445|1973|2317|3106|3115|3122|3162|3185|3312|3313|3320|3430|3606|3609|3662|3684|3689|3838|3936|4001|4067|4128|4790|4893|4927|4939|5306|5657|5687|5692|5696|5699|5710|5721|5777|6195|6197|6844|7076|7184|7329|8480|8878|9049|9775|10762|23321|79671|552900	ANXA1|CASP1|CD44|CFL1|CSK|EIF4A1|FLNB|HLA-B|HLA-DPB1|HLA-DRA|HMOX1|HNRNPF|HSPA8|HSPA9|HSP90AA1|IFI35|IL18|ILF3|IRF4|ITGAM|ITGB2|KPNA2|LCP1|LMNB1|LYN|MAOA|NFKB1|NRAS|NUP88|OAS2|PITPNA|PRTN3|PSMA6|PSMB4|PSMB8|PSMB10|PSMD4|PSME2|PTPN6|RPS6KA1|RPS6KA3|VAMP2|TIMP1|HSP90B1|UBE2I|RAE1|SQSTM1|AIP|EIF4A3|NUP50|TRIM2|NLRX1|BOLA2	-4.9
Reactome Gene Sets	6	R-HSA-1280215	IM-LGD-NL	Cytokine Signaling in Immune system	-5.1	2.8	5.3	30286	786	333	24	7.2	1.4	301|867|1445|3115|3122|3133|3662|3684|3689|3911|3936|3965|4128|5336|5657|5777|6810|8086|23650|54472|79671|81027|200081|552900	ANXA1|CBL|CSK|HLA-DPB1|HLA-DRA|HLA-E|IRF4|ITGAM|ITGB2|LAMA5|LCP1|LGALS9|MAOA|PLCG2|PRTN3|PTPN6|STX4|AAAS|TRIM29|TOLLIP|NLRX1|TUBB1|TXLNA|BOLA2	-3.7
Reactome Gene Sets	6	R-HSA-9707564	EGC-L	Cytoprotection by HMOX1	-7.6	5.8	7.9	30286	64	1217	15	1.2	0.32	1327|1329|1340|1345|1350|3163|4513|4697|6341|6834|9167|9377|9997|10498|79718	COX4I1|COX5B|COX6B1|COX6C|COX7C|HMOX2|COX2|NDUFA4|SCO1|SURF1|COX7A2L|COX5A|SCO2|CARM1|TBL1XR1	-6.4
Reactome Gene Sets	6	R-HSA-9707564	GC-L	Cytoprotection by HMOX1	-5.2	9.9	7.5	30286	64	336	7	2.1	0.78	1327|1345|1350|2168|4513|6341|6834	COX4I1|COX6C|COX7C|FABP1|COX2|SCO1|SURF1	-4.2
Reactome Gene Sets	6	R-HSA-9707564	GASTRITIS	Cytoprotection by HMOX1	-9.6	9.2	10	30286	64	724	14	1.9	0.51	1327|1329|1345|1350|3162|3163|4513|4697|6341|6834|9167|9377|10128|51204	COX4I1|COX5B|COX6C|COX7C|HMOX1|HMOX2|COX2|NDUFA4|SCO1|SURF1|COX7A2L|COX5A|LRPPRC|TACO1	-8.2
Reactome Gene Sets	6	R-HSA-9707564	IM-LGD-NL	Cytoprotection by HMOX1	-2.3	5.7	4	30286	64	333	4	1.2	0.6	1327|1345|4513|9377	COX4I1|COX6C|COX2|COX5A	-1.5
Reactome Gene Sets	6	R-HSA-9707564	IM-LGD-L	Cytoprotection by HMOX1	-12	8.4	11	30286	64	1012	18	1.8	0.42	1327|1329|1337|1340|1345|1350|2168|3162|4513|4697|6341|6834|9167|9377|9997|10128|10498|51204	COX4I1|COX5B|COX6A1|COX6B1|COX6C|COX7C|FABP1|HMOX1|COX2|NDUFA4|SCO1|SURF1|COX7A2L|COX5A|SCO2|LRPPRC|CARM1|TACO1	-10
Reactome Gene Sets	6	R-HSA-9707564	GC-NL	Cytoprotection by HMOX1	-11	7.9	11	30286	64	1076	18	1.7	0.39	644|1327|1329|1340|1345|1350|2168|3162|3163|4513|4697|6341|6834|9167|9377|9997|10498|51204	BLVRA|COX4I1|COX5B|COX6B1|COX6C|COX7C|FABP1|HMOX1|HMOX2|COX2|NDUFA4|SCO1|SURF1|COX7A2L|COX5A|SCO2|CARM1|TACO1	-9.4
Reactome Gene Sets	6	R-HSA-156584	GC-NL	Cytosolic sulfonation of small molecules	-2.9	5.9	4.6	30286	24	1076	5	0.46	0.21	6817|6822|9060|9061|27284	SULT1A1|SULT2A1|PAPSS2|PAPSS1|SULT1B1	-2
Reactome Gene Sets	6	R-HSA-379716	GC-NL	Cytosolic tRNA aminoacylation	-2.9	5.9	4.6	30286	24	1076	5	0.46	0.21	3035|3376|5464|7453|8565	HARS1|IARS1|PPA1|WARS1|YARS1	-2
Reactome Gene Sets	6	R-HSA-168928	GASTRITIS	DDX58/IFIH1-mediated induction of interferon-alpha/beta	-2.5	3.6	3.6	30286	82	724	7	0.97	0.36	3093|3146|3320|3326|6283|7318|8517	UBE2K|HMGB1|HSP90AA1|HSP90AB1|S100A12|UBA7|IKBKG	-2
Reactome Gene Sets	6	R-HSA-429914	IM-LGD-L	Deadenylation-dependent mRNA decay	-5.8	6	6.9	30286	55	1012	11	1.1	0.33	1656|1973|6499|9652|9775|11157|28960|51013|57819|80153|85456	DDX6|EIF4A1|SKIC2|SKIC3|EIF4A3|LSM6|DCPS|EXOSC1|LSM2|EDC3|TNKS1BP1	-4.8
Reactome Gene Sets	6	R-HSA-429914	EGC-L	Deadenylation-dependent mRNA decay	-13	8.6	12	30286	55	1217	19	1.6	0.36	1973|6499|9652|9775|11157|11340|25804|27257|27258|28960|51010|51013|51690|54512|55802|56915|80153|118460|219988	EIF4A1|SKIC2|SKIC3|EIF4A3|LSM6|EXOSC8|LSM4|LSM1|LSM3|DCPS|EXOSC3|EXOSC1|LSM7|EXOSC4|DCP1A|EXOSC5|EDC3|EXOSC6|PATL1	-11
Reactome Gene Sets	6	R-HSA-5621480	GASTRITIS	Dectin-2 family	-2.4	6	4.1	30286	28	724	4	0.55	0.28	4067|4583|5336|56667	LYN|MUC2|PLCG2|MUC13	-2
Reactome Gene Sets	6	R-HSA-5621480	GC-NL	Dectin-2 family	-2.6	5	4.1	30286	28	1076	5	0.46	0.21	4067|4583|4586|5336|56667	LYN|MUC2|MUC5AC|PLCG2|MUC13	-1.7
Reactome Gene Sets	6	R-HSA-5678895	GASTRITIS	Defective CFTR causes cystic fibrosis	-2.5	4.1	3.8	30286	61	724	6	0.83	0.34	5694|5695|5696|5699|5721|7415	PSMB6|PSMB7|PSMB8|PSMB10|PSME2|VCP	-2
Reactome Gene Sets	6	R-HSA-5678895	IM-LGD-L	Defective CFTR causes cystic fibrosis	-2.4	3.4	3.5	30286	61	1012	7	0.69	0.26	5687|5692|5696|5699|5710|5721|11160	PSMA6|PSMB4|PSMB8|PSMB10|PSMD4|PSME2|ERLIN2	-2
Reactome Gene Sets	6	R-HSA-9657688	IM-LGD-L	Defective factor XII causes hereditary angioedema	-4.4	30	9.3	30286	3	1012	3	0.3	0.17	2147|2161|3818	F2|F12|KLKB1	-3.6
Reactome Gene Sets	6	R-HSA-3371599	EGC-L	Defective HLCS causes multiple carboxylase deficiency	-5.7	18	9.1	30286	7	1217	5	0.41	0.18	31|5091|5095|56922|64087	ACACA|PC|PCCA|MCCC1|MCCC2	-4.7
Reactome Gene Sets	6	R-HSA-3371599	GC-NL	Defective HLCS causes multiple carboxylase deficiency	-4.3	16	7.7	30286	7	1076	4	0.37	0.19	5091|5095|56922|64087	PC|PCCA|MCCC1|MCCC2	-3
Reactome Gene Sets	6	R-HSA-3371599	GASTRITIS	Defective HLCS causes multiple carboxylase deficiency	-3.4	18	7	30286	7	724	3	0.41	0.24	5095|56922|64087	PCCA|MCCC1|MCCC2	-2.7
Reactome Gene Sets	6	R-HSA-3371599	IM-LGD-NL	Defective HLCS causes multiple carboxylase deficiency	-4.4	39	11	30286	7	333	3	0.9	0.52	31|5095|56922	ACACA|PCCA|MCCC1	-3.1
Reactome Gene Sets	6	R-HSA-3371599	IM-LGD-L	Defective HLCS causes multiple carboxylase deficiency	-6.1	21	10	30286	7	1012	5	0.49	0.22	31|5091|5095|56922|64087	ACACA|PC|PCCA|MCCC1|MCCC2	-5
Reactome Gene Sets	6	R-HSA-9701190	GASTRITIS	Defective homologous recombination repair (HRR) due to BRCA2 loss of function	-2.5	5.1	4.1	30286	41	724	5	0.69	0.31	472|4683|5982|6117|10111	ATM|NBN|RFC2|RPA1|RAD50	-2.1
Reactome Gene Sets	6	R-HSA-9701190	EGC-L	Defective homologous recombination repair (HRR) due to BRCA2 loss of function	-2.3	3.6	3.5	30286	41	1217	6	0.49	0.2	4683|5982|5984|6117|6119|10111	NBN|RFC2|RFC4|RPA1|RPA3|RAD50	-1.9
Reactome Gene Sets	6	R-HSA-9657689	IM-LGD-L	Defective SERPING1 causes hereditary angioedema	-4.4	30	9.3	30286	3	1012	3	0.3	0.17	710|2161|3818	SERPING1|F12|KLKB1	-3.6
Reactome Gene Sets	6	R-HSA-5619107	EGC-L	Defective TPR may confer susceptibility towards thyroid papillary carcinoma (TPC)	-3.7	5.6	5.3	30286	31	1217	7	0.58	0.22	4927|5903|7175|8086|8480|10762|53371	NUP88|RANBP2|TPR|AAAS|RAE1|NUP50|NUP54	-3
Reactome Gene Sets	6	R-HSA-3323169	IM-LGD-L	Defects in biotin (Btn) metabolism	-5.7	19	9.3	30286	8	1012	5	0.49	0.22	31|5091|5095|56922|64087	ACACA|PC|PCCA|MCCC1|MCCC2	-4.7
Reactome Gene Sets	6	R-HSA-3323169	GASTRITIS	Defects in biotin (Btn) metabolism	-3.2	16	6.5	30286	8	724	3	0.41	0.24	5095|56922|64087	PCCA|MCCC1|MCCC2	-2.6
Reactome Gene Sets	6	R-HSA-3323169	IM-LGD-NL	Defects in biotin (Btn) metabolism	-4.1	34	9.9	30286	8	333	3	0.9	0.52	31|5095|56922	ACACA|PCCA|MCCC1	-2.9
Reactome Gene Sets	6	R-HSA-3323169	EGC-L	Defects in biotin (Btn) metabolism	-7	19	10	30286	8	1217	6	0.49	0.2	31|686|5091|5095|56922|64087	ACACA|BTD|PC|PCCA|MCCC1|MCCC2	-5.8
Reactome Gene Sets	6	R-HSA-3323169	GC-NL	Defects in biotin (Btn) metabolism	-5.5	18	9	30286	8	1076	5	0.46	0.21	686|5091|5095|56922|64087	BTD|PC|PCCA|MCCC1|MCCC2	-4.1
Reactome Gene Sets	6	R-HSA-3296482	EGC-L	Defects in vitamin and cofactor metabolism	-7.1	10	8.8	30286	22	1217	9	0.74	0.25	31|686|2694|4594|5091|5095|56922|64087|326625	ACACA|BTD|CBLIF|MMUT|PC|PCCA|MCCC1|MCCC2|MMAB	-5.9
Reactome Gene Sets	6	R-HSA-3296482	IM-LGD-L	Defects in vitamin and cofactor metabolism	-6.5	11	8.6	30286	22	1012	8	0.79	0.28	31|2694|4594|5091|5095|56922|64087|326625	ACACA|CBLIF|MMUT|PC|PCCA|MCCC1|MCCC2|MMAB	-5.4
Reactome Gene Sets	6	R-HSA-3296482	GC-NL	Defects in vitamin and cofactor metabolism	-6.3	10	8.3	30286	22	1076	8	0.74	0.26	686|2694|4594|5091|5095|56922|64087|326625	BTD|CBLIF|MMUT|PC|PCCA|MCCC1|MCCC2|MMAB	-4.7
Reactome Gene Sets	6	R-HSA-3296482	IM-LGD-NL	Defects in vitamin and cofactor metabolism	-2.8	12	5.6	30286	22	333	3	0.9	0.52	31|5095|56922	ACACA|PCCA|MCCC1	-1.9
Reactome Gene Sets	6	R-HSA-9651496	IM-LGD-L	Defects of contact activation system (CAS) and kallikrein/kinin system (KKS)	-3.9	9.4	6.2	30286	16	1012	5	0.49	0.22	710|2147|2161|3818|7450	SERPING1|F2|F12|KLKB1|VWF	-3.2
Reactome Gene Sets	6	R-HSA-4641257	IM-LGD-L	Degradation of AXIN	-2	3.3	3.1	30286	55	1012	6	0.59	0.24	5687|5692|5696|5699|5710|5721	PSMA6|PSMB4|PSMB8|PSMB10|PSMD4|PSME2	-1.7
Reactome Gene Sets	6	R-HSA-1614558	EGC-L	Degradation of cysteine and homocysteine	-2.6	6.6	4.5	30286	15	1217	4	0.33	0.16	1468|2806|6821|23474	SLC25A10|GOT2|SUOX|ETHE1	-2.1
Reactome Gene Sets	6	R-HSA-1614558	IM-LGD-L	Degradation of cysteine and homocysteine	-2.9	8	5	30286	15	1012	4	0.4	0.2	1468|2806|6821|23474	SLC25A10|GOT2|SUOX|ETHE1	-2.4
Reactome Gene Sets	6	R-HSA-1474228	GC-NL	Degradation of the extracellular matrix	-5	3.4	5.5	30286	140	1076	17	1.6	0.38	2|824|960|1291|1292|1303|1508|1514|1991|2200|2201|3914|4313|4318|5340|5654|388743	A2M|CAPN2|CD44|COL6A1|COL6A2|COL12A1|CTSB|CTSL|ELANE|FBN1|FBN2|LAMB3|MMP2|MMP9|PLG|HTRA1|CAPN8	-3.6
Reactome Gene Sets	6	R-HSA-1474228	EGC-L	Degradation of the extracellular matrix	-3.3	2.7	4	30286	140	1217	15	1.2	0.32	2|824|960|1277|1291|1292|1303|1508|1514|1991|3914|4318|5340|5654|85007	A2M|CAPN2|CD44|COL1A1|COL6A1|COL6A2|COL12A1|CTSB|CTSL|ELANE|LAMB3|MMP9|PLG|HTRA1|PHYKPL	-2.7
Reactome Gene Sets	6	R-HSA-4419969	GASTRITIS	Depolymerization of the Nuclear Lamina	-3.4	11	6.2	30286	15	724	4	0.55	0.28	983|4001|23592|221496	CDK1|LMNB1|LEMD3|LEMD2	-2.8
Reactome Gene Sets	6	R-HSA-4419969	EGC-L	Depolymerization of the Nuclear Lamina	-3.7	8.3	5.8	30286	15	1217	5	0.41	0.18	983|4001|7112|23592|221496	CDK1|LMNB1|TMPO|LEMD3|LEMD2	-3
Reactome Gene Sets	6	R-HSA-4419969	IM-LGD-L	Depolymerization of the Nuclear Lamina	-2.9	8	5	30286	15	1012	4	0.4	0.2	2010|4001|23592|221496	EMD|LMNB1|LEMD3|LEMD2	-2.4
Reactome Gene Sets	6	R-HSA-3299685	IM-LGD-NL	Detoxification of Reactive Oxygen Species	-2.1	7.4	4.1	30286	37	333	3	0.9	0.52	1536|10935|25824	CYBB|PRDX3|PRDX5	-1.4
Reactome Gene Sets	6	R-HSA-3299685	GC-NL	Detoxification of Reactive Oxygen Species	-2	3.8	3.3	30286	37	1076	5	0.46	0.21	318|1536|10587|10935|25824	NUDT2|CYBB|TXNRD2|PRDX3|PRDX5	-1.3
Reactome Gene Sets	6	R-HSA-9734767	EGC-NL	Developmental Cell Lineages	-3.3	19	7.2	30286	40	120	3	2.5	1.4	2171|7037|51806	FABP5|TFRC|CALML5	-2.3
Reactome Gene Sets	6	R-HSA-9725554	EGC-NL	Differentiation of keratinocytes in interfollicular epidermis in mammalian skin	-3.3	19	7.2	30286	40	120	3	2.5	1.4	2171|7037|51806	FABP5|TFRC|CALML5	-2.3
Reactome Gene Sets	6	R-HSA-5602358	GASTRITIS	Diseases associated with the TLR signaling cascade	-2.2	5.2	3.7	30286	32	724	4	0.55	0.28	929|3146|6279|8517	CD14|HMGB1|S100A8|IKBKG	-1.8
Reactome Gene Sets	6	R-HSA-5602358	GC-NL	Diseases associated with the TLR signaling cascade	-3.1	5.3	4.6	30286	32	1076	6	0.56	0.23	929|2243|2244|6279|6280|8517	CD14|FGA|FGB|S100A8|S100A9|IKBKG	-2.1
Reactome Gene Sets	6	R-HSA-5602358	EGC-L	Diseases associated with the TLR signaling cascade	-2.8	4.7	4.2	30286	32	1217	6	0.49	0.2	929|2243|2244|3146|6279|6280	CD14|FGA|FGB|HMGB1|S100A8|S100A9	-2.3
Reactome Gene Sets	6	R-HSA-9675136	GASTRITIS	Diseases of DNA Double-Strand Break Repair	-2.5	5.1	4.1	30286	41	724	5	0.69	0.31	472|4683|5982|6117|10111	ATM|NBN|RFC2|RPA1|RAD50	-2.1
Reactome Gene Sets	6	R-HSA-9675136	EGC-L	Diseases of DNA Double-Strand Break Repair	-2.3	3.6	3.5	30286	41	1217	6	0.49	0.2	4683|5982|5984|6117|6119|10111	NBN|RFC2|RFC4|RPA1|RPA3|RAD50	-1.9
Reactome Gene Sets	6	R-HSA-9675135	GASTRITIS	Diseases of DNA repair	-2.1	4.1	3.5	30286	51	724	5	0.69	0.31	472|4683|5982|6117|10111	ATM|NBN|RFC2|RPA1|RAD50	-1.8
Reactome Gene Sets	6	R-HSA-3781865	GC-NL	Diseases of glycosylation	-2.3	2.3	3.1	30286	144	1076	12	1.1	0.32	1464|1605|2582|2592|4583|4586|5199|7057|9060|9526|56667|85365	CSPG4|DAG1|GALE|GALT|MUC2|MUC5AC|CFP|THBS1|PAPSS2|MPDU1|MUC13|ALG2	-1.5
Reactome Gene Sets	6	R-HSA-3781865	IM-LGD-L	Diseases of glycosylation	-2	2.3	2.9	30286	144	1012	11	1.1	0.33	633|1605|3074|4583|5199|7057|8813|9526|10418|56052|56667	BGN|DAG1|HEXB|MUC2|CFP|THBS1|DPM1|MPDU1|SPON1|ALG1|MUC13	-1.7
Reactome Gene Sets	6	R-HSA-9671793	IM-LGD-L	Diseases of hemostasis	-3.5	7.9	5.6	30286	19	1012	5	0.49	0.22	710|2147|2161|3818|7450	SERPING1|F2|F12|KLKB1|VWF	-2.9
Reactome Gene Sets	6	R-HSA-5260271	GASTRITIS	Diseases of Immune System	-2.2	5.2	3.7	30286	32	724	4	0.55	0.28	929|3146|6279|8517	CD14|HMGB1|S100A8|IKBKG	-1.8
Reactome Gene Sets	6	R-HSA-5260271	GC-NL	Diseases of Immune System	-3.1	5.3	4.6	30286	32	1076	6	0.56	0.23	929|2243|2244|6279|6280|8517	CD14|FGA|FGB|S100A8|S100A9|IKBKG	-2.1
Reactome Gene Sets	6	R-HSA-5260271	EGC-L	Diseases of Immune System	-2.8	4.7	4.2	30286	32	1217	6	0.49	0.2	929|2243|2244|3146|6279|6280	CD14|FGA|FGB|HMGB1|S100A8|S100A9	-2.3
Reactome Gene Sets	6	R-HSA-5668914	IM-LGD-L	Diseases of metabolism	-7.6	3.4	6.9	30286	250	1012	28	2.8	0.52	31|100|633|1605|2230|2694|2990|2992|3074|4128|4583|4594|5091|5095|5199|7057|7172|8813|9526|10418|22934|26873|51181|56052|56667|56922|64087|326625	ACACA|ADA|BGN|DAG1|FDX1|CBLIF|GUSB|GYG1|HEXB|MAOA|MUC2|MMUT|PC|PCCA|CFP|THBS1|TPMT|DPM1|MPDU1|SPON1|RPIA|OPLAH|DCXR|ALG1|MUC13|MCCC1|MCCC2|MMAB	-6.4
Reactome Gene Sets	6	R-HSA-5668914	GC-NL	Diseases of metabolism	-7.6	3.3	6.9	30286	250	1076	29	2.7	0.49	100|686|1464|1605|2230|2328|2582|2592|2694|2990|2992|4128|4583|4586|4594|5091|5095|5199|6233|7057|7172|9060|9526|51181|56667|56922|64087|85365|326625	ADA|BTD|CSPG4|DAG1|FDX1|FMO3|GALE|GALT|CBLIF|GUSB|GYG1|MAOA|MUC2|MUC5AC|MMUT|PC|PCCA|CFP|RPS27A|THBS1|TPMT|PAPSS2|MPDU1|DCXR|MUC13|MCCC1|MCCC2|ALG2|MMAB	-5.9
Reactome Gene Sets	6	R-HSA-5668914	EGC-L	Diseases of metabolism	-7	3	6.5	30286	250	1217	30	2.5	0.44	31|100|191|353|686|1605|2328|2582|2592|2694|2990|2992|3074|4128|4583|4586|4594|5091|5095|5199|6888|7057|8813|9060|9526|51181|56667|56922|64087|326625	ACACA|ADA|AHCY|APRT|BTD|DAG1|FMO3|GALE|GALT|CBLIF|GUSB|GYG1|HEXB|MAOA|MUC2|MUC5AC|MMUT|PC|PCCA|CFP|TALDO1|THBS1|DPM1|PAPSS2|MPDU1|DCXR|MUC13|MCCC1|MCCC2|MMAB	-5.8
Reactome Gene Sets	6	R-HSA-5668914	IM-LGD-NL	Diseases of metabolism	-4	4	5	30286	250	333	11	3.3	0.98	31|100|2328|2992|4128|4583|5095|7057|9526|51181|56922	ACACA|ADA|FMO3|GYG1|MAOA|MUC2|PCCA|THBS1|MPDU1|DCXR|MCCC1	-2.8
Reactome Gene Sets	6	R-HSA-5668914	EGC-NL	Diseases of metabolism	-2.5	5	4.1	30286	250	120	5	4.2	1.8	2328|2799|2992|4583|5236	FMO3|GNS|GYG1|MUC2|PGM1	-1.7
Reactome Gene Sets	6	R-HSA-5663202	GASTRITIS	Diseases of signal transduction by growth factor receptors and second messengers	-3.9	2.3	4.3	30286	459	724	25	3.5	0.68	391|867|1445|1956|2120|2963|3320|3662|4067|4478|5694|5695|5696|5699|5721|5777|5880|7094|7171|7175|7415|7450|7529|51530|57674	RHOG|CBL|CSK|EGFR|ETV6|GTF2F2|HSP90AA1|IRF4|LYN|MSN|PSMB6|PSMB7|PSMB8|PSMB10|PSME2|PTPN6|RAC2|TLN1|TPM4|TPR|VCP|VWF|YWHAB|ZC3HC1|RNF213	-3.2
Reactome Gene Sets	6	R-HSA-5663202	GC-NL	Diseases of signal transduction by growth factor receptors and second messengers	-3.9	2	4.2	30286	459	1076	33	3.1	0.53	391|867|1213|1445|1488|2120|2243|2244|2962|2963|3662|4067|4478|4627|5037|5434|5695|5704|5777|5880|6233|7094|7170|7171|7175|7450|7525|8036|8546|8826|9061|11140|11160	RHOG|CBL|CLTC|CSK|CTBP2|ETV6|FGA|FGB|GTF2F1|GTF2F2|IRF4|LYN|MSN|MYH9|PEBP1|POLR2E|PSMB7|PSMC4|PTPN6|RAC2|RPS27A|TLN1|TPM3|TPM4|TPR|VWF|YES1|SHOC2|AP3B1|IQGAP1|PAPSS1|CDC37|ERLIN2	-2.8
Reactome Gene Sets	6	R-HSA-5663202	EGC-L	Diseases of signal transduction by growth factor receptors and second messengers	-3.3	1.8	3.7	30286	459	1217	34	2.8	0.47	867|1445|1488|2120|2243|2244|2475|2962|2963|3320|3674|4067|4478|4627|5434|5696|5699|5704|5710|5721|5777|5880|5903|7094|7171|7175|8036|8546|8826|8878|11140|11160|22938|79718	CBL|CSK|CTBP2|ETV6|FGA|FGB|MTOR|GTF2F1|GTF2F2|HSP90AA1|ITGA2B|LYN|MSN|MYH9|POLR2E|PSMB8|PSMB10|PSMC4|PSMD4|PSME2|PTPN6|RAC2|RANBP2|TLN1|TPM4|TPR|SHOC2|AP3B1|IQGAP1|SQSTM1|CDC37|ERLIN2|SNW1|TBL1XR1	-2.7
Reactome Gene Sets	6	R-HSA-5663202	IM-LGD-L	Diseases of signal transduction by growth factor receptors and second messengers	-2.5	1.8	3.1	30286	459	1012	27	2.7	0.51	1445|1488|2243|2244|2475|2962|2963|3320|3662|3674|4067|4893|5434|5687|5692|5696|5699|5710|5721|5777|5880|7450|8878|9061|9648|11140|11160	CSK|CTBP2|FGA|FGB|MTOR|GTF2F1|GTF2F2|HSP90AA1|IRF4|ITGA2B|LYN|NRAS|POLR2E|PSMA6|PSMB4|PSMB8|PSMB10|PSMD4|PSME2|PTPN6|RAC2|VWF|SQSTM1|PAPSS1|GCC2|CDC37|ERLIN2	-2
Reactome Gene Sets	6	R-HSA-5619115	EGC-L	Disorders of transmembrane transporters	-2.7	2.3	3.4	30286	176	1217	16	1.3	0.33	335|1356|4927|5696|5699|5704|5710|5721|5903|7175|8086|8480|10613|10762|11160|53371	APOA1|CP|NUP88|PSMB8|PSMB10|PSMC4|PSMD4|PSME2|RANBP2|TPR|AAAS|RAE1|ERLIN1|NUP50|ERLIN2|NUP54	-2.2
Reactome Gene Sets	6	R-HSA-75205	IM-LGD-L	Dissolution of Fibrin Clot	-3.2	9.2	5.5	30286	13	1012	4	0.4	0.2	3273|5269|5340|6281	HRG|SERPINB6|PLG|S100A10	-2.6
Reactome Gene Sets	6	R-HSA-75205	GC-NL	Dissolution of Fibrin Clot	-3.1	8.7	5.3	30286	13	1076	4	0.37	0.19	3273|5269|5340|6281	HRG|SERPINB6|PLG|S100A10	-2.1
Reactome Gene Sets	6	R-HSA-75205	EGC-L	Dissolution of Fibrin Clot	-2.9	7.7	4.9	30286	13	1217	4	0.33	0.16	3273|5269|5340|6281	HRG|SERPINB6|PLG|S100A10	-2.3
Reactome Gene Sets	6	R-HSA-73893	GASTRITIS	DNA Damage Bypass	-3	5.2	4.6	30286	48	724	6	0.83	0.34	5111|5424|5982|6117|7318|7415	PCNA|POLD1|RFC2|RPA1|UBA7|VCP	-2.5
Reactome Gene Sets	6	R-HSA-73893	EGC-L	DNA Damage Bypass	-4	4.7	5.2	30286	48	1217	9	0.74	0.25	5111|5424|5425|5982|5984|6117|6119|9100|54107	PCNA|POLD1|POLD2|RFC2|RFC4|RPA1|RPA3|USP10|POLE3	-3.2
Reactome Gene Sets	6	R-HSA-73893	GC-NL	DNA Damage Bypass	-2.8	4.1	4.1	30286	48	1076	7	0.65	0.25	5111|5424|5981|5982|5984|6233|54107	PCNA|POLD1|RFC1|RFC2|RFC4|RPS27A|POLE3	-1.9
Reactome Gene Sets	6	R-HSA-2559586	GASTRITIS	DNA Damage/Telomere Stress Induced Senescence	-2.5	3.7	3.8	30286	79	724	7	0.97	0.36	472|3007|3009|4001|4683|10111|54386	ATM|H1-3|H1-5|LMNB1|NBN|RAD50|TERF2IP	-2.1
Reactome Gene Sets	6	R-HSA-5693532	EGC-L	DNA Double-Strand Break Repair	-3.7	2.6	4.4	30286	170	1217	18	1.5	0.35	142|2237|3838|4683|5111|5424|5425|5982|5984|6117|6119|7329|7515|9031|10111|54107|128312|151987	PARP1|FEN1|KPNA2|NBN|PCNA|POLD1|POLD2|RFC2|RFC4|RPA1|RPA3|UBE2I|XRCC1|BAZ1B|RAD50|POLE3|H2BC26|PPP4R2	-3.1
Reactome Gene Sets	6	R-HSA-5693532	GASTRITIS	DNA Double-Strand Break Repair	-2.1	2.5	3	30286	170	724	10	1.4	0.43	142|472|2237|4683|5111|5424|5982|6117|7329|10111	PARP1|ATM|FEN1|NBN|PCNA|POLD1|RFC2|RPA1|UBE2I|RAD50	-1.8
Reactome Gene Sets	6	R-HSA-5693532	GC-NL	DNA Double-Strand Break Repair	-2.5	2.3	3.3	30286	170	1076	14	1.3	0.35	142|2237|2547|4683|5111|5424|5981|5982|5984|6233|7329|8467|9031|54107	PARP1|FEN1|XRCC6|NBN|PCNA|POLD1|RFC1|RFC2|RFC4|RPS27A|UBE2I|SMARCA5|BAZ1B|POLE3	-1.7
Reactome Gene Sets	6	R-HSA-5693532	IM-LGD-L	DNA Double-Strand Break Repair	-2.3	2.3	3.1	30286	170	1012	13	1.3	0.35	472|3014|3838|4683|5111|5424|5425|5982|6118|7329|7520|9031|10111	ATM|H2AX|KPNA2|NBN|PCNA|POLD1|POLD2|RFC2|RPA2|UBE2I|XRCC5|BAZ1B|RAD50	-1.9
Reactome Gene Sets	6	R-HSA-73894	EGC-L	DNA Repair	-3.6	2.1	4.1	30286	335	1217	28	2.3	0.43	142|2237|3838|4350|4683|5111|5424|5425|5434|5982|5984|6117|6119|6917|7329|7515|7874|8607|9031|9100|10111|10973|27339|54107|54386|79913|128312|151987	PARP1|FEN1|KPNA2|MPG|NBN|PCNA|POLD1|POLD2|POLR2E|RFC2|RFC4|RPA1|RPA3|TCEA1|UBE2I|XRCC1|USP7|RUVBL1|BAZ1B|USP10|RAD50|ASCC3|PRPF19|POLE3|TERF2IP|ACTR5|H2BC26|PPP4R2	-3
Reactome Gene Sets	6	R-HSA-69306	GASTRITIS	DNA Replication	-3.2	2.9	4.1	30286	186	724	13	1.8	0.49	2237|3837|4173|4175|5111|5424|5694|5695|5696|5699|5721|5982|6117	FEN1|KPNB1|MCM4|MCM6|PCNA|POLD1|PSMB6|PSMB7|PSMB8|PSMB10|PSME2|RFC2|RPA1	-2.6
Reactome Gene Sets	6	R-HSA-69306	EGC-L	DNA Replication	-4.2	2.7	4.7	30286	186	1217	20	1.6	0.36	2237|3837|4171|4173|4174|4175|5111|5424|5425|5696|5699|5704|5710|5721|5982|5984|6117|6119|54107|128312	FEN1|KPNB1|MCM2|MCM4|MCM5|MCM6|PCNA|POLD1|POLD2|PSMB8|PSMB10|PSMC4|PSMD4|PSME2|RFC2|RFC4|RPA1|RPA3|POLE3|H2BC26	-3.4
Reactome Gene Sets	6	R-HSA-69306	GC-NL	DNA Replication	-2.2	2.1	2.9	30286	186	1076	14	1.3	0.35	2237|4171|4173|4174|4175|5111|5424|5695|5704|5981|5982|5984|6233|54107	FEN1|MCM2|MCM4|MCM5|MCM6|PCNA|POLD1|PSMB7|PSMC4|RFC1|RFC2|RFC4|RPS27A|POLE3	-1.4
Reactome Gene Sets	6	R-HSA-69306	IM-LGD-L	DNA Replication	-3.3	2.6	4	30286	186	1012	16	1.6	0.39	3014|4171|4173|4174|4175|5111|5424|5425|5687|5692|5696|5699|5710|5721|5982|6118	H2AX|MCM2|MCM4|MCM5|MCM6|PCNA|POLD1|POLD2|PSMA6|PSMB4|PSMB8|PSMB10|PSMD4|PSME2|RFC2|RPA2	-2.7
Reactome Gene Sets	6	R-HSA-69002	EGC-L	DNA Replication Pre-Initiation	-2.3	2.2	3.1	30286	158	1217	14	1.2	0.31	3837|4171|4173|4174|4175|5696|5699|5704|5710|5721|6117|6119|54107|128312	KPNB1|MCM2|MCM4|MCM5|MCM6|PSMB8|PSMB10|PSMC4|PSMD4|PSME2|RPA1|RPA3|POLE3|H2BC26	-1.9
Reactome Gene Sets	6	R-HSA-69002	IM-LGD-L	DNA Replication Pre-Initiation	-2.2	2.3	3	30286	158	1012	12	1.2	0.34	3014|4171|4173|4174|4175|5687|5692|5696|5699|5710|5721|6118	H2AX|MCM2|MCM4|MCM5|MCM6|PSMA6|PSMB4|PSMB8|PSMB10|PSMD4|PSME2|RPA2	-1.8
Reactome Gene Sets	6	R-HSA-69190	EGC-L	DNA strand elongation	-8.7	9.3	9.6	30286	32	1217	12	0.99	0.28	2237|4171|4173|4174|4175|5111|5424|5425|5982|5984|6117|6119	FEN1|MCM2|MCM4|MCM5|MCM6|PCNA|POLD1|POLD2|RFC2|RFC4|RPA1|RPA3	-7.4
Reactome Gene Sets	6	R-HSA-69190	GC-NL	DNA strand elongation	-7	8.8	8.5	30286	32	1076	10	0.93	0.29	2237|4171|4173|4174|4175|5111|5424|5981|5982|5984	FEN1|MCM2|MCM4|MCM5|MCM6|PCNA|POLD1|RFC1|RFC2|RFC4	-5.4
Reactome Gene Sets	6	R-HSA-69190	IM-LGD-L	DNA strand elongation	-6.2	8.4	7.8	30286	32	1012	9	0.89	0.3	4171|4173|4174|4175|5111|5424|5425|5982|6118	MCM2|MCM4|MCM5|MCM6|PCNA|POLD1|POLD2|RFC2|RPA2	-5.1
Reactome Gene Sets	6	R-HSA-69190	GASTRITIS	DNA strand elongation	-5.1	9.2	7.2	30286	32	724	7	0.97	0.36	2237|4173|4175|5111|5424|5982|6117	FEN1|MCM4|MCM6|PCNA|POLD1|RFC2|RPA1	-4.1
Reactome Gene Sets	6	R-HSA-1168372	GC-L	Downstream signaling events of B Cell Receptor (BCR)	-2.6	5.4	4.3	30286	83	336	5	1.5	0.66	4794|5696|5699|5721|8517	NFKBIE|PSMB8|PSMB10|PSME2|IKBKG	-2.2
Reactome Gene Sets	6	R-HSA-1168372	GASTRITIS	Downstream signaling events of B Cell Receptor (BCR)	-2.4	3.5	3.6	30286	83	724	7	0.97	0.36	5532|5694|5695|5696|5699|5721|8517	PPP3CB|PSMB6|PSMB7|PSMB8|PSMB10|PSME2|IKBKG	-2
Reactome Gene Sets	6	R-HSA-1168372	IM-LGD-L	Downstream signaling events of B Cell Receptor (BCR)	-2.7	3.2	3.8	30286	83	1012	9	0.89	0.3	4790|4794|4893|5687|5692|5696|5699|5710|5721	NFKB1|NFKBIE|NRAS|PSMA6|PSMB4|PSMB8|PSMB10|PSMD4|PSME2	-2.3
Reactome Gene Sets	6	R-HSA-202424	GC-L	Downstream TCR signaling	-3.1	5.5	4.7	30286	98	336	6	1.8	0.72	3115|3122|5696|5699|5721|8517	HLA-DPB1|HLA-DRA|PSMB8|PSMB10|PSME2|IKBKG	-2.5
Reactome Gene Sets	6	R-HSA-202424	GASTRITIS	Downstream TCR signaling	-3.2	3.8	4.4	30286	98	724	9	1.2	0.41	3115|3122|3123|5694|5695|5696|5699|5721|8517	HLA-DPB1|HLA-DRA|HLA-DRB1|PSMB6|PSMB7|PSMB8|PSMB10|PSME2|IKBKG	-2.6
Reactome Gene Sets	6	R-HSA-202424	IM-LGD-L	Downstream TCR signaling	-2.3	2.7	3.2	30286	98	1012	9	0.89	0.3	3115|3122|4790|5687|5692|5696|5699|5710|5721	HLA-DPB1|HLA-DRA|NFKB1|PSMA6|PSMB4|PSMB8|PSMB10|PSMD4|PSME2	-1.9
Reactome Gene Sets	6	R-HSA-5696400	EGC-L	Dual Incision in GG-NER	-4.5	5.5	5.9	30286	41	1217	9	0.74	0.25	142|5111|5424|5425|5982|5984|6117|6119|54107	PARP1|PCNA|POLD1|POLD2|RFC2|RFC4|RPA1|RPA3|POLE3	-3.7
Reactome Gene Sets	6	R-HSA-5696400	GC-NL	Dual Incision in GG-NER	-4.1	5.5	5.5	30286	41	1076	8	0.74	0.26	142|5111|5424|5981|5982|5984|6233|54107	PARP1|PCNA|POLD1|RFC1|RFC2|RFC4|RPS27A|POLE3	-2.9
Reactome Gene Sets	6	R-HSA-5696400	GASTRITIS	Dual Incision in GG-NER	-2.5	5.1	4.1	30286	41	724	5	0.69	0.31	142|5111|5424|5982|6117	PARP1|PCNA|POLD1|RFC2|RPA1	-2.1
Reactome Gene Sets	6	R-HSA-6782135	IM-LGD-L	Dual incision in TC-NER	-2.9	3.7	4.1	30286	64	1012	8	0.79	0.28	5111|5424|5425|5434|5982|6118|7874|27339	PCNA|POLD1|POLD2|POLR2E|RFC2|RPA2|USP7|PRPF19	-2.4
Reactome Gene Sets	6	R-HSA-6782135	GC-NL	Dual incision in TC-NER	-2.7	3.5	3.9	30286	64	1076	8	0.74	0.26	5111|5424|5434|5981|5982|5984|6233|54107	PCNA|POLD1|POLR2E|RFC1|RFC2|RFC4|RPS27A|POLE3	-1.9
Reactome Gene Sets	6	R-HSA-6782135	EGC-L	Dual incision in TC-NER	-5.1	4.7	6	30286	64	1217	12	0.99	0.28	5111|5424|5425|5434|5982|5984|6117|6119|6917|7874|27339|54107	PCNA|POLD1|POLD2|POLR2E|RFC2|RFC4|RPA1|RPA3|TCEA1|USP7|PRPF19|POLE3	-4.2
Reactome Gene Sets	6	R-HSA-8866654	EGC-L	E3 ubiquitin ligases ubiquitinate target proteins	-2	3	3.1	30286	59	1217	7	0.58	0.22	5111|7323|23168|51255|54623|56254|79577	PCNA|UBE2D3|RTF1|RNF181|PAF1|RNF20|CDC73	-1.7
Reactome Gene Sets	6	R-HSA-3000178	GC-NL	ECM proteoglycans	-2.8	3.3	3.9	30286	76	1076	9	0.84	0.28	1291|1292|1404|1605|3673|3685|3908|6678|7448	COL6A1|COL6A2|HAPLN1|DAG1|ITGA2|ITGAV|LAMA2|SPARC|VTN	-1.9
Reactome Gene Sets	6	R-HSA-3000178	IM-LGD-NL	ECM proteoglycans	-2.8	6	4.6	30286	76	333	5	1.5	0.67	1291|1292|3371|3911|7448	COL6A1|COL6A2|TNC|LAMA5|VTN	-1.9
Reactome Gene Sets	6	R-HSA-3000178	EGC-NL	ECM proteoglycans	-2.5	10	4.9	30286	76	120	3	2.5	1.4	1292|3371|6678	COL6A2|TNC|SPARC	-1.6
Reactome Gene Sets	6	R-HSA-182971	GC-L	EGFR downregulation	-2.3	8.7	4.6	30286	31	336	3	0.89	0.51	6455|6456|30011	SH3GL1|SH3GL2|SH3KBP1	-1.9
Reactome Gene Sets	6	R-HSA-182971	GC-NL	EGFR downregulation	-2.4	4.5	3.8	30286	31	1076	5	0.46	0.21	867|6233|6455|8027|30011	CBL|RPS27A|SH3GL1|STAM|SH3KBP1	-1.6
Reactome Gene Sets	6	R-HSA-182971	GASTRITIS	EGFR downregulation	-3.1	6.7	5	30286	31	724	5	0.69	0.31	867|1956|6456|8027|30011	CBL|EGFR|SH3GL2|STAM|SH3KBP1	-2.5
Reactome Gene Sets	6	R-HSA-182971	EGC-L	EGFR downregulation	-2.1	4	3.4	30286	31	1217	5	0.41	0.18	867|2060|6455|8027|30011	CBL|EPS15|SH3GL1|STAM|SH3KBP1	-1.8
Reactome Gene Sets	6	R-HSA-1566948	GC-NL	Elastic fibre formation	-4.7	5.8	6.1	30286	44	1076	9	0.84	0.28	2200|2201|3678|3685|4052|4053|4237|7448|10516	FBN1|FBN2|ITGA5|ITGAV|LTBP1|LTBP2|MFAP2|VTN|FBLN5	-3.4
Reactome Gene Sets	6	R-HSA-917729	IM-LGD-L	Endosomal Sorting Complex Required For Transport (ESCRT)	-2.4	4.7	3.9	30286	32	1012	5	0.49	0.22	8027|9525|29082|51510|128866	STAM|VPS4B|CHMP4A|CHMP5|CHMP4B	-2
Reactome Gene Sets	6	R-HSA-1236977	GASTRITIS	Endosomal/Vacuolar pathway	-2.7	11	5.4	30286	11	724	3	0.41	0.24	1514|3106|4012	CTSL|HLA-B|LNPEP	-2.2
Reactome Gene Sets	6	R-HSA-203615	IM-LGD-L	eNOS activation	-2.2	7.5	4.2	30286	12	1012	3	0.3	0.17	3320|6697|10434	HSP90AA1|SPR|LYPLA1	-1.8
Reactome Gene Sets	6	R-HSA-3928663	GC-NL	EPHA-mediated growth cone collapse	-2.4	4.7	3.9	30286	30	1076	5	0.46	0.21	4067|4627|4637|7525|103910	LYN|MYH9|MYL6|YES1|MYL12B	-1.6
Reactome Gene Sets	6	R-HSA-3928662	IM-LGD-L	EPHB-mediated forward signaling	-2.6	4.3	3.9	30286	42	1012	6	0.59	0.24	1072|4067|8976|10095|10109|10552	CFL1|LYN|WASL|ARPC1B|ARPC2|ARPC1A	-2.1
Reactome Gene Sets	6	R-HSA-3928665	GC-NL	EPH-ephrin mediated repulsion of cells	-2.7	3.9	3.9	30286	51	1076	7	0.65	0.25	1173|1213|2049|4067|4313|4318|7525	AP2M1|CLTC|EPHB3|LYN|MMP2|MMP9|YES1	-1.8
Reactome Gene Sets	6	R-HSA-2682334	GC-NL	EPH-Ephrin signaling	-4.7	4	5.5	30286	92	1076	13	1.2	0.33	1173|1213|2049|4067|4313|4318|4627|4637|5062|7525|10095|10552|103910	AP2M1|CLTC|EPHB3|LYN|MMP2|MMP9|MYH9|MYL6|PAK2|YES1|ARPC1B|ARPC1A|MYL12B	-3.3
Reactome Gene Sets	6	R-HSA-212165	EGC-L	Epigenetic regulation of gene expression	-2.4	2.1	3.2	30286	187	1217	16	1.3	0.33	1810|3054|5434|5931|7913|8932|9031|9219|11335|23378|26993|54815|57459|80335|84661|128312	DR1|HCFC1|POLR2E|RBBP7|DEK|MBD2|BAZ1B|MTA2|CBX3|RRP8|AKAP8L|GATAD2A|GATAD2B|WDR82|DPY30|H2BC26	-2
Reactome Gene Sets	6	R-HSA-199977	EGC-L	ER to Golgi Anterograde Transport	-7.9	3.9	7.3	30286	154	1217	24	2	0.4	378|381|829|966|1075|1522|1783|3998|9554|10113|10121|10382|10960|10972|11196|23256|23423|26958|54732|55860|81027|84617|91949|375056	ARF4|ARF5|CAPZA1|CD59|CTSC|CTSZ|DYNC1LI2|LMAN1|SEC22B|PREB|ACTR1A|TUBB4A|LMAN2|TMED10|SEC23IP|SCFD1|TMED3|COPG2|TMED9|ACTR10|TUBB1|TUBB6|COG7|MIA3	-6.6
Reactome Gene Sets	6	R-HSA-199977	GC-NL	ER to Golgi Anterograde Transport	-3.9	2.9	4.6	30286	154	1076	16	1.5	0.37	381|966|1075|1522|1783|3998|5265|10121|10466|10484|54732|55860|83548|84342|84617|91949	ARF5|CD59|CTSC|CTSZ|DYNC1LI2|LMAN1|SERPINA1|ACTR1A|COG5|SEC23A|TMED9|ACTR10|COG3|COG8|TUBB6|COG7	-2.8
Reactome Gene Sets	6	R-HSA-199977	IM-LGD-NL	ER to Golgi Anterograde Transport	-2.1	3.5	3.3	30286	154	333	6	1.8	0.73	1075|1522|10466|10484|26958|81027	CTSC|CTSZ|COG5|SEC23A|COPG2|TUBB1	-1.4
Reactome Gene Sets	6	R-HSA-199977	IM-LGD-L	ER to Golgi Anterograde Transport	-2.2	2.3	3.1	30286	154	1012	12	1.2	0.34	1075|1522|3998|5265|9554|9871|10113|10484|10802|10972|22870|54732	CTSC|CTSZ|LMAN1|SERPINA1|SEC22B|SEC24D|PREB|SEC23A|SEC24A|TMED10|PPP6R1|TMED9	-1.9
Reactome Gene Sets	6	R-HSA-1236974	GASTRITIS	ER-Phagosome pathway	-7.5	6.5	8.2	30286	90	724	14	1.9	0.51	811|929|2923|3106|3146|5694|5695|5696|5699|5721|6279|6890|6892|8517	CALR|CD14|PDIA3|HLA-B|HMGB1|PSMB6|PSMB7|PSMB8|PSMB10|PSME2|S100A8|TAP1|TAPBP|IKBKG	-6.3
Reactome Gene Sets	6	R-HSA-1236974	IM-LGD-L	ER-Phagosome pathway	-5.8	4.7	6.5	30286	90	1012	14	1.4	0.37	811|2243|2244|3106|5687|5692|5696|5699|5710|5721|6279|9554|10952|23480	CALR|FGA|FGB|HLA-B|PSMA6|PSMB4|PSMB8|PSMB10|PSMD4|PSME2|S100A8|SEC22B|SEC61B|SEC61G	-4.8
Reactome Gene Sets	6	R-HSA-1236974	EGC-L	ER-Phagosome pathway	-5.5	4.1	6.1	30286	90	1217	15	1.2	0.32	929|2243|2244|3106|3146|5696|5699|5704|5710|5721|6279|6280|9554|10952|23480	CD14|FGA|FGB|HLA-B|HMGB1|PSMB8|PSMB10|PSMC4|PSMD4|PSME2|S100A8|S100A9|SEC22B|SEC61B|SEC61G	-4.6
Reactome Gene Sets	6	R-HSA-1236974	GC-L	ER-Phagosome pathway	-4.2	7	6	30286	90	336	7	2.1	0.78	3106|5696|5699|5721|6279|6892|8517	HLA-B|PSMB8|PSMB10|PSME2|S100A8|TAPBP|IKBKG	-3.4
Reactome Gene Sets	6	R-HSA-1236974	GC-NL	ER-Phagosome pathway	-4.1	3.8	5	30286	90	1076	12	1.1	0.32	929|2243|2244|3106|5695|5704|6233|6279|6280|6892|8517|8673	CD14|FGA|FGB|HLA-B|PSMB7|PSMC4|RPS27A|S100A8|S100A9|TAPBP|IKBKG|VAMP8	-2.9
Reactome Gene Sets	6	R-HSA-8939211	EGC-L	ESR-mediated signaling	-3.6	2.4	4.1	30286	222	1217	21	1.7	0.37	865|1655|2288|2788|2962|2963|3315|3320|3326|3838|4318|5434|5481|7031|8243|9126|10498|10728|54331|55970|128312	CBFB|DDX5|FKBP4|GNG7|GTF2F1|GTF2F2|HSPB1|HSP90AA1|HSP90AB1|KPNA2|MMP9|POLR2E|PPID|TFF1|SMC1A|SMC3|CARM1|PTGES3|GNG2|GNG12|H2BC26	-2.9
Reactome Gene Sets	6	R-HSA-9018519	EGC-L	Estrogen-dependent gene expression	-3	2.5	3.8	30286	149	1217	15	1.2	0.32	865|1655|2288|2962|2963|3320|3326|3838|5434|7031|8243|9126|10498|10728|128312	CBFB|DDX5|FKBP4|GTF2F1|GTF2F2|HSP90AA1|HSP90AB1|KPNA2|POLR2E|TFF1|SMC1A|SMC3|CARM1|PTGES3|H2BC26	-2.4
Reactome Gene Sets	6	R-HSA-71384	GASTRITIS	Ethanol oxidation	-2.6	10	5.1	30286	12	724	3	0.41	0.24	130|216|217	ADH6|ALDH1A1|ALDH2	-2.1
Reactome Gene Sets	6	R-HSA-71384	EGC-L	Ethanol oxidation	-3	8.3	5.2	30286	12	1217	4	0.33	0.16	125|126|216|55902	ADH1B|ADH1C|ALDH1A1|ACSS2	-2.5
Reactome Gene Sets	6	R-HSA-71384	IM-LGD-L	Ethanol oxidation	-2.2	7.5	4.2	30286	12	1012	3	0.3	0.17	125|216|219	ADH1B|ALDH1A1|ALDH1B1	-1.8
Reactome Gene Sets	6	R-HSA-71384	GC-NL	Ethanol oxidation	-2.1	7	4	30286	12	1076	3	0.28	0.16	126|216|55902	ADH1C|ALDH1A1|ACSS2	-1.4
Reactome Gene Sets	6	R-HSA-156842	GC-NL	Eukaryotic Translation Elongation	-4.6	3.9	5.4	30286	94	1076	13	1.2	0.33	1917|2197|4736|6146|6169|6170|6193|6209|6210|6233|6235|9349|23521	EEF1A2|FAU|RPL10A|RPL22|RPL38|RPL39|RPS5|RPS15|RPS15A|RPS27A|RPS29|RPL23|RPL13A	-3.3
Reactome Gene Sets	6	R-HSA-156842	EGC-L	Eukaryotic Translation Elongation	-4	3.4	4.9	30286	94	1217	13	1.1	0.29	1938|4736|6122|6134|6135|6136|6139|6146|6188|6193|6210|6231|23521	EEF2|RPL10A|RPL3|RPL10|RPL11|RPL12|RPL17|RPL22|RPS3|RPS5|RPS15A|RPS26|RPL13A	-3.3
Reactome Gene Sets	6	R-HSA-72613	EGC-L	Eukaryotic Translation Initiation	-4	3.1	4.7	30286	120	1217	15	1.2	0.32	1968|1973|4736|6122|6134|6135|6136|6139|6146|6188|6193|6210|6231|8894|23521	EIF2S3|EIF4A1|RPL10A|RPL3|RPL10|RPL11|RPL12|RPL17|RPL22|RPS3|RPS5|RPS15A|RPS26|EIF2S2|RPL13A	-3.3
Reactome Gene Sets	6	R-HSA-72613	GC-NL	Eukaryotic Translation Initiation	-3.5	3	4.3	30286	120	1076	13	1.2	0.33	1964|2197|4736|6146|6169|6170|6193|6209|6210|6233|6235|9349|23521	EIF1AX|FAU|RPL10A|RPL22|RPL38|RPL39|RPS5|RPS15|RPS15A|RPS27A|RPS29|RPL23|RPL13A	-2.4
Reactome Gene Sets	6	R-HSA-72764	GC-NL	Eukaryotic Translation Termination	-4.6	3.9	5.4	30286	94	1076	13	1.2	0.33	2197|4736|6146|6169|6170|6193|6209|6210|6233|6235|9349|23521|51504	FAU|RPL10A|RPL22|RPL38|RPL39|RPS5|RPS15|RPS15A|RPS27A|RPS29|RPL23|RPL13A|TRMT112	-3.3
Reactome Gene Sets	6	R-HSA-72764	EGC-L	Eukaryotic Translation Termination	-4	3.4	4.9	30286	94	1217	13	1.1	0.29	4736|6122|6134|6135|6136|6139|6146|6188|6193|6210|6231|23521|51504	RPL10A|RPL3|RPL10|RPL11|RPL12|RPL17|RPL22|RPS3|RPS5|RPS15A|RPS26|RPL13A|TRMT112	-3.3
Reactome Gene Sets	6	R-HSA-168274	EGC-L	Export of Viral Ribonucleoproteins from Nucleus	-4.4	6	5.9	30286	33	1217	8	0.66	0.23	4927|5901|5903|7175|8086|8480|10762|53371	NUP88|RAN|RANBP2|TPR|AAAS|RAE1|NUP50|NUP54	-3.6
Reactome Gene Sets	6	R-HSA-168274	GC-NL	Export of Viral Ribonucleoproteins from Nucleus	-2.2	4.3	3.6	30286	33	1076	5	0.46	0.21	5901|7175|8086|8480|53371	RAN|TPR|AAAS|RAE1|NUP54	-1.5
Reactome Gene Sets	6	R-HSA-180786	EGC-L	Extension of Telomeres	-6.2	5.9	7.1	30286	51	1217	12	0.99	0.28	2237|5111|5424|5425|5982|5984|6117|6119|8607|10856|54386|55505	FEN1|PCNA|POLD1|POLD2|RFC2|RFC4|RPA1|RPA3|RUVBL1|RUVBL2|TERF2IP|NOP10	-5.1
Reactome Gene Sets	6	R-HSA-180786	GC-NL	Extension of Telomeres	-4.2	5	5.4	30286	51	1076	9	0.84	0.28	2237|5111|5424|5981|5982|5984|10856|54386|55505	FEN1|PCNA|POLD1|RFC1|RFC2|RFC4|RUVBL2|TERF2IP|NOP10	-2.9
Reactome Gene Sets	6	R-HSA-180786	GASTRITIS	Extension of Telomeres	-2.9	4.9	4.4	30286	51	724	6	0.83	0.34	2237|5111|5424|5982|6117|54386	FEN1|PCNA|POLD1|RFC2|RPA1|TERF2IP	-2.4
Reactome Gene Sets	6	R-HSA-180786	IM-LGD-L	Extension of Telomeres	-3.6	4.7	4.9	30286	51	1012	8	0.79	0.28	5111|5424|5425|5982|6118|10856|54386|55505	PCNA|POLD1|POLD2|RFC2|RPA2|RUVBL2|TERF2IP|NOP10	-2.9
Reactome Gene Sets	6	R-HSA-1474244	EGC-L	Extracellular matrix organization	-11	3.4	8.6	30286	300	1217	41	3.4	0.52	2|824|871|960|1277|1291|1292|1303|1508|1514|1605|1991|2243|2244|3383|3385|3655|3674|3684|3689|3908|3914|4052|4053|4237|4318|5339|5340|5351|5352|5654|6678|7057|7448|8573|8974|8985|10516|64175|79709|85007	A2M|CAPN2|SERPINH1|CD44|COL1A1|COL6A1|COL6A2|COL12A1|CTSB|CTSL|DAG1|ELANE|FGA|FGB|ICAM1|ICAM3|ITGA6|ITGA2B|ITGAM|ITGB2|LAMA2|LAMB3|LTBP1|LTBP2|MFAP2|MMP9|PLEC|PLG|PLOD1|PLOD2|HTRA1|SPARC|THBS1|VTN|CASK|P4HA2|PLOD3|FBLN5|P3H1|COLGALT1|PHYKPL	-9.6
Reactome Gene Sets	6	R-HSA-1474244	IM-LGD-L	Extracellular matrix organization	-9.2	3.4	7.7	30286	300	1012	34	3.4	0.57	2|633|827|871|960|977|1306|1508|1605|1991|2243|2244|3385|3655|3672|3673|3674|3684|3689|3818|3908|3914|5339|5340|5351|5479|7057|7076|7448|7450|8573|8974|8985|79709	A2M|BGN|CAPN6|SERPINH1|CD44|CD151|COL15A1|CTSB|DAG1|ELANE|FGA|FGB|ICAM3|ITGA6|ITGA1|ITGA2|ITGA2B|ITGAM|ITGB2|KLKB1|LAMA2|LAMB3|PLEC|PLG|PLOD1|PPIB|THBS1|TIMP1|VTN|VWF|CASK|P4HA2|PLOD3|COLGALT1	-7.9
Reactome Gene Sets	6	R-HSA-1474244	GC-L	Extracellular matrix organization	-4.5	3.9	5.4	30286	300	336	13	3.9	1.1	960|1508|1991|3371|3385|3678|3689|4237|4318|5352|5654|6678|7450	CD44|CTSB|ELANE|TNC|ICAM3|ITGA5|ITGB2|MFAP2|MMP9|PLOD2|HTRA1|SPARC|VWF	-3.6
Reactome Gene Sets	6	R-HSA-1474244	GASTRITIS	Extracellular matrix organization	-4.4	2.8	4.9	30286	300	724	20	2.8	0.61	827|871|960|1291|1292|1508|1514|1991|3383|3385|3689|5479|7276|7450|8425|8573|8985|11117|79709|340267	CAPN6|SERPINH1|CD44|COL6A1|COL6A2|CTSB|CTSL|ELANE|ICAM1|ICAM3|ITGB2|PPIB|TTR|VWF|LTBP4|CASK|PLOD3|EMILIN1|COLGALT1|COL28A1	-3.6
Reactome Gene Sets	6	R-HSA-1474244	IM-LGD-NL	Extracellular matrix organization	-6.6	4.9	7.1	30286	300	333	16	4.8	1.2	871|1291|1292|1508|3371|3684|3689|3911|4053|4237|7057|7448|7450|8573|79709|340267	SERPINH1|COL6A1|COL6A2|CTSB|TNC|ITGAM|ITGB2|LAMA5|LTBP2|MFAP2|THBS1|VTN|VWF|CASK|COLGALT1|COL28A1	-5
Reactome Gene Sets	6	R-HSA-1474244	EGC-NL	Extracellular matrix organization	-3.7	5.9	5.4	30286	300	120	7	5.8	2.1	1292|1991|3371|3385|3689|6678|7276	COL6A2|ELANE|TNC|ICAM3|ITGB2|SPARC|TTR	-2.6
Reactome Gene Sets	6	R-HSA-1474244	GC-NL	Extracellular matrix organization	-17	4.4	11	30286	300	1076	47	4.4	0.62	2|824|871|960|1291|1292|1303|1404|1508|1514|1605|1991|2200|2201|2243|2244|3383|3385|3673|3678|3684|3685|3689|3908|3914|4052|4053|4237|4313|4318|5339|5340|5351|5352|5654|6678|7057|7448|7450|7837|8573|8974|8985|10516|64175|79709|388743	A2M|CAPN2|SERPINH1|CD44|COL6A1|COL6A2|COL12A1|HAPLN1|CTSB|CTSL|DAG1|ELANE|FBN1|FBN2|FGA|FGB|ICAM1|ICAM3|ITGA2|ITGA5|ITGAM|ITGAV|ITGB2|LAMA2|LAMB3|LTBP1|LTBP2|MFAP2|MMP2|MMP9|PLEC|PLG|PLOD1|PLOD2|HTRA1|SPARC|THBS1|VTN|VWF|PXDN|CASK|P4HA2|PLOD3|FBLN5|P3H1|COLGALT1|CAPN8	-15
Reactome Gene Sets	6	R-HSA-8978868	EGC-L	Fatty acid metabolism	-7.4	3.5	6.9	30286	176	1217	25	2.1	0.41	31|34|35|224|788|1374|1376|1384|1666|1892|2181|2182|3030|3032|4594|5095|10455|10728|51144|51495|55856|80221|84693|197322|390916	ACACA|ACADM|ACADS|ALDH3A2|SLC25A20|CPT1A|CPT2|CRAT|DECR1|ECHS1|ACSL3|ACSL4|HADHA|HADHB|MMUT|PCCA|ECI2|PTGES3|HSD17B12|HACD3|ACOT13|ACSF2|MCEE|ACSF3|NUDT19	-6.2
Reactome Gene Sets	6	R-HSA-8978868	GC-NL	Fatty acid metabolism	-7.1	3.7	6.8	30286	176	1076	23	2.1	0.44	34|35|788|873|1376|1384|1666|1892|2166|2182|3030|3032|4594|5095|8644|10455|51703|55856|80142|80221|84693|197322|390916	ACADM|ACADS|SLC25A20|CBR1|CPT2|CRAT|DECR1|ECHS1|FAAH|ACSL4|HADHA|HADHB|MMUT|PCCA|AKR1C3|ECI2|ACSL5|ACOT13|PTGES2|ACSF2|MCEE|ACSF3|NUDT19	-5.4
Reactome Gene Sets	6	R-HSA-8978868	GASTRITIS	Fatty acid metabolism	-5.9	4	6.3	30286	176	724	17	2.3	0.56	35|1376|1384|1666|2166|3030|3032|5095|5444|9261|10455|10728|27349|55856|80221|84693|390916	ACADS|CPT2|CRAT|DECR1|FAAH|HADHA|HADHB|PCCA|PON1|MAPKAPK2|ECI2|PTGES3|MCAT|ACOT13|ACSF2|MCEE|NUDT19	-4.9
Reactome Gene Sets	6	R-HSA-8978868	GC-L	Fatty acid metabolism	-3.8	4.6	5.1	30286	176	336	9	2.7	0.88	788|2166|5095|9261|51144|55856|84693|197322|390916	SLC25A20|FAAH|PCCA|MAPKAPK2|HSD17B12|ACOT13|MCEE|ACSF3|NUDT19	-3.1
Reactome Gene Sets	6	R-HSA-8978868	IM-LGD-L	Fatty acid metabolism	-8.9	4.3	8	30286	176	1012	25	2.5	0.49	31|34|35|788|1376|1384|1666|1892|2181|2879|3030|3032|4594|5095|7923|10455|10728|27349|51144|51703|55856|80142|84693|197322|390916	ACACA|ACADM|ACADS|SLC25A20|CPT2|CRAT|DECR1|ECHS1|ACSL3|GPX4|HADHA|HADHB|MMUT|PCCA|HSD17B8|ECI2|PTGES3|MCAT|HSD17B12|ACSL5|ACOT13|PTGES2|MCEE|ACSF3|NUDT19	-7.6
Reactome Gene Sets	6	R-HSA-434316	EGC-L	Fatty Acids bound to GPR40 (FFAR1) regulate insulin secretion	-2.5	9.3	4.8	30286	8	1217	3	0.25	0.14	2767|2776|5331	GNA11|GNAQ|PLCB3	-2.1
Reactome Gene Sets	6	R-HSA-75105	IM-LGD-L	Fatty acyl-CoA biosynthesis	-2.9	4.9	4.4	30286	37	1012	6	0.59	0.24	31|2181|7923|51144|51703|197322	ACACA|ACSL3|HSD17B8|HSD17B12|ACSL5|ACSF3	-2.4
Reactome Gene Sets	6	R-HSA-75105	EGC-L	Fatty acyl-CoA biosynthesis	-2.5	4	3.8	30286	37	1217	6	0.49	0.2	31|2181|2182|51144|51495|197322	ACACA|ACSL3|ACSL4|HSD17B12|HACD3|ACSF3	-2
Reactome Gene Sets	6	R-HSA-8854050	IM-LGD-L	FBXL7 down-regulates AURKA during mitotic entry and in early mitosis	-2	3.3	3.1	30286	55	1012	6	0.59	0.24	5687|5692|5696|5699|5710|5721	PSMA6|PSMB4|PSMB8|PSMB10|PSMD4|PSME2	-1.7
Reactome Gene Sets	6	R-HSA-2454202	GASTRITIS	Fc epsilon receptor (FCERI) signaling	-2.8	3.1	3.9	30286	134	724	10	1.4	0.43	3937|4067|5336|5532|5694|5695|5696|5699|5721|8517	LCP2|LYN|PLCG2|PPP3CB|PSMB6|PSMB7|PSMB8|PSMB10|PSME2|IKBKG	-2.3
Reactome Gene Sets	6	R-HSA-2871809	GASTRITIS	FCERI mediated Ca+2 mobilization	-2.1	5.1	3.7	30286	33	724	4	0.55	0.28	3937|4067|5336|5532	LCP2|LYN|PLCG2|PPP3CB	-1.8
Reactome Gene Sets	6	R-HSA-2871837	GASTRITIS	FCERI mediated NF-kB activation	-2.5	3.6	3.6	30286	82	724	7	0.97	0.36	4067|5694|5695|5696|5699|5721|8517	LYN|PSMB6|PSMB7|PSMB8|PSMB10|PSME2|IKBKG	-2
Reactome Gene Sets	6	R-HSA-2871837	IM-LGD-L	FCERI mediated NF-kB activation	-2.2	2.9	3.2	30286	82	1012	8	0.79	0.28	4067|4790|5687|5692|5696|5699|5710|5721	LYN|NFKB1|PSMA6|PSMB4|PSMB8|PSMB10|PSMD4|PSME2	-1.8
Reactome Gene Sets	6	R-HSA-2029480	GASTRITIS	Fcgamma receptor (FCGR) dependent phagocytosis	-3.7	4.4	4.9	30286	86	724	9	1.2	0.41	3320|3326|4067|5336|7456|8976|9844|10095|23646	HSP90AA1|HSP90AB1|LYN|PLCG2|WIPF1|WASL|ELMO1|ARPC1B|PLD3	-3
Reactome Gene Sets	6	R-HSA-2029480	GC-NL	Fcgamma receptor (FCGR) dependent phagocytosis	-4.3	3.9	5.2	30286	86	1076	12	1.1	0.32	3326|4067|4627|5336|5580|7454|7456|7525|9844|10095|10552|10787	HSP90AB1|LYN|MYH9|PLCG2|PRKCD|WAS|WIPF1|YES1|ELMO1|ARPC1B|ARPC1A|NCKAP1	-3
Reactome Gene Sets	6	R-HSA-2029480	IM-LGD-L	Fcgamma receptor (FCGR) dependent phagocytosis	-2.6	3.1	3.7	30286	86	1012	9	0.89	0.3	1072|3320|4067|7454|8976|10095|10109|10552|23646	CFL1|HSP90AA1|LYN|WAS|WASL|ARPC1B|ARPC2|ARPC1A|PLD3	-2.2
Reactome Gene Sets	6	R-HSA-2029480	EGC-L	Fcgamma receptor (FCGR) dependent phagocytosis	-2.6	2.9	3.6	30286	86	1217	10	0.82	0.26	3320|3326|4067|4627|5580|7456|10095|10552|10787|23191	HSP90AA1|HSP90AB1|LYN|MYH9|PRKCD|WIPF1|ARPC1B|ARPC1A|NCKAP1|CYFIP1	-2.2
Reactome Gene Sets	6	R-HSA-9664422	GC-NL	FCGR3A-mediated phagocytosis	-3.7	4.3	4.9	30286	59	1076	9	0.84	0.28	4067|4627|7454|7456|7525|9844|10095|10552|10787	LYN|MYH9|WAS|WIPF1|YES1|ELMO1|ARPC1B|ARPC1A|NCKAP1	-2.6
Reactome Gene Sets	6	R-HSA-9664422	EGC-L	FCGR3A-mediated phagocytosis	-2	3	3.1	30286	59	1217	7	0.58	0.22	4067|4627|7456|10095|10552|10787|23191	LYN|MYH9|WIPF1|ARPC1B|ARPC1A|NCKAP1|CYFIP1	-1.7
Reactome Gene Sets	6	R-HSA-6803529	EGC-L	FGFR2 alternative splicing	-4.3	6.7	5.9	30286	26	1217	7	0.58	0.22	2962|2963|3185|3187|4670|5434|5725	GTF2F1|GTF2F2|HNRNPF|HNRNPH1|HNRNPM|POLR2E|PTBP1	-3.5
Reactome Gene Sets	6	R-HSA-6803529	IM-LGD-L	FGFR2 alternative splicing	-3.7	6.9	5.6	30286	26	1012	6	0.59	0.24	2962|2963|3185|3187|5434|5725	GTF2F1|GTF2F2|HNRNPF|HNRNPH1|POLR2E|PTBP1	-3.1
Reactome Gene Sets	6	R-HSA-6803529	GC-NL	FGFR2 alternative splicing	-2.7	5.4	4.3	30286	26	1076	5	0.46	0.21	2962|2963|4670|5434|5725	GTF2F1|GTF2F2|HNRNPM|POLR2E|PTBP1	-1.8
Reactome Gene Sets	6	R-HSA-390450	EGC-L	Folding of actin by CCT/TriC	-2.2	7.5	4.2	30286	10	1217	3	0.25	0.14	10575|10694|22948	CCT4|CCT8|CCT5	-1.8
Reactome Gene Sets	6	R-HSA-72689	GC-NL	Formation of a pool of free 40S subunits	-4.2	3.6	5	30286	102	1076	13	1.2	0.33	1964|2197|4736|6146|6169|6170|6193|6209|6210|6233|6235|9349|23521	EIF1AX|FAU|RPL10A|RPL22|RPL38|RPL39|RPS5|RPS15|RPS15A|RPS27A|RPS29|RPL23|RPL13A	-2.9
Reactome Gene Sets	6	R-HSA-72689	EGC-L	Formation of a pool of free 40S subunits	-3.1	2.9	4	30286	102	1217	12	0.99	0.28	4736|6122|6134|6135|6136|6139|6146|6188|6193|6210|6231|23521	RPL10A|RPL3|RPL10|RPL11|RPL12|RPL17|RPL22|RPS3|RPS5|RPS15A|RPS26|RPL13A	-2.5
Reactome Gene Sets	6	R-HSA-163210	EGC-L	Formation of ATP by chemiosmotic coupling	-8	12	9.9	30286	18	1217	9	0.74	0.25	506|513|514|515|521|522|539|4509|10632	ATP5F1B|ATP5F1D|ATP5F1E|ATP5PB|ATP5ME|ATP5PF|ATP5PO|ATP8|ATP5MG	-6.8
Reactome Gene Sets	6	R-HSA-163210	GASTRITIS	Formation of ATP by chemiosmotic coupling	-10	21	13	30286	18	724	9	1.2	0.41	506|513|514|515|522|539|4509|10632|27109	ATP5F1B|ATP5F1D|ATP5F1E|ATP5PB|ATP5PF|ATP5PO|ATP8|ATP5MG|DMAC2L	-8.6
Reactome Gene Sets	6	R-HSA-163210	IM-LGD-L	Formation of ATP by chemiosmotic coupling	-10	17	12	30286	18	1012	10	0.99	0.31	506|513|514|515|521|522|539|4509|10632|27109	ATP5F1B|ATP5F1D|ATP5F1E|ATP5PB|ATP5ME|ATP5PF|ATP5PO|ATP8|ATP5MG|DMAC2L	-8.8
Reactome Gene Sets	6	R-HSA-163210	GC-NL	Formation of ATP by chemiosmotic coupling	-10	16	12	30286	18	1076	10	0.93	0.29	506|513|514|515|521|522|539|4509|10632|27109	ATP5F1B|ATP5F1D|ATP5F1E|ATP5PB|ATP5ME|ATP5PF|ATP5PO|ATP8|ATP5MG|DMAC2L	-8.2
Reactome Gene Sets	6	R-HSA-140877	IM-LGD-L	Formation of Fibrin Clot (Clotting Cascade)	-8.5	9.2	9.5	30286	39	1012	12	1.2	0.34	2|710|2147|2161|2165|2243|2244|3053|3818|5627|5657|7450	A2M|SERPING1|F2|F12|F13B|FGA|FGB|SERPIND1|KLKB1|PROS1|PRTN3|VWF	-7.2
Reactome Gene Sets	6	R-HSA-140877	GC-NL	Formation of Fibrin Clot (Clotting Cascade)	-6.1	7.2	7.5	30286	39	1076	10	0.93	0.29	2|710|2147|2165|2243|2244|5627|5657|7450|10544	A2M|SERPING1|F2|F13B|FGA|FGB|PROS1|PRTN3|VWF|PROCR	-4.6
Reactome Gene Sets	6	R-HSA-140877	EGC-L	Formation of Fibrin Clot (Clotting Cascade)	-4.7	5.7	6.1	30286	39	1217	9	0.74	0.25	2|710|2162|2165|2243|2244|5627|5657|10544	A2M|SERPING1|F13A1|F13B|FGA|FGB|PROS1|PRTN3|PROCR	-3.8
Reactome Gene Sets	6	R-HSA-140877	GC-L	Formation of Fibrin Clot (Clotting Cascade)	-2	6.9	3.9	30286	39	336	3	0.89	0.51	5657|7450|10544	PRTN3|VWF|PROCR	-1.7
Reactome Gene Sets	6	R-HSA-140877	IM-LGD-NL	Formation of Fibrin Clot (Clotting Cascade)	-2	7	4	30286	39	333	3	0.9	0.52	5657|7450|10544	PRTN3|VWF|PROCR	-1.3
Reactome Gene Sets	6	R-HSA-167152	EGC-L	Formation of HIV elongation complex in the absence of HIV Tat	-3.4	4.4	4.7	30286	45	1217	8	0.66	0.23	2962|2963|5434|6749|6829|6917|6923|11198	GTF2F1|GTF2F2|POLR2E|SSRP1|SUPT5H|TCEA1|ELOB|SUPT16H	-2.8
Reactome Gene Sets	6	R-HSA-167152	GASTRITIS	Formation of HIV elongation complex in the absence of HIV Tat	-2.4	4.6	3.8	30286	45	724	5	0.69	0.31	2963|6749|6827|11198|25920	GTF2F2|SSRP1|SUPT4H1|SUPT16H|NELFB	-2
Reactome Gene Sets	6	R-HSA-167152	GC-NL	Formation of HIV elongation complex in the absence of HIV Tat	-2.3	3.8	3.5	30286	45	1076	6	0.56	0.23	2962|2963|5434|6749|11198|25920	GTF2F1|GTF2F2|POLR2E|SSRP1|SUPT16H|NELFB	-1.5
Reactome Gene Sets	6	R-HSA-167200	EGC-L	Formation of HIV-1 elongation complex containing HIV-1 Tat	-3.6	4.6	4.9	30286	43	1217	8	0.66	0.23	2962|2963|5434|6749|6829|6917|6923|11198	GTF2F1|GTF2F2|POLR2E|SSRP1|SUPT5H|TCEA1|ELOB|SUPT16H	-2.9
Reactome Gene Sets	6	R-HSA-167200	GC-NL	Formation of HIV-1 elongation complex containing HIV-1 Tat	-2.4	3.9	3.7	30286	43	1076	6	0.56	0.23	2962|2963|5434|6749|11198|25920	GTF2F1|GTF2F2|POLR2E|SSRP1|SUPT16H|NELFB	-1.6
Reactome Gene Sets	6	R-HSA-167200	GASTRITIS	Formation of HIV-1 elongation complex containing HIV-1 Tat	-2.5	4.9	4	30286	43	724	5	0.69	0.31	2963|6749|6827|11198|25920	GTF2F2|SSRP1|SUPT4H1|SUPT16H|NELFB	-2
Reactome Gene Sets	6	R-HSA-112382	EGC-L	Formation of RNA Pol II elongation complex	-5.6	5.1	6.5	30286	58	1217	12	0.99	0.28	2962|2963|5434|6749|6829|6830|6917|6923|11198|23168|54623|79577	GTF2F1|GTF2F2|POLR2E|SSRP1|SUPT5H|SUPT6H|TCEA1|ELOB|SUPT16H|RTF1|PAF1|CDC73	-4.6
Reactome Gene Sets	6	R-HSA-112382	GC-NL	Formation of RNA Pol II elongation complex	-2.4	3.4	3.5	30286	58	1076	7	0.65	0.25	2962|2963|5434|6749|11198|25920|79577	GTF2F1|GTF2F2|POLR2E|SSRP1|SUPT16H|NELFB|CDC73	-1.6
Reactome Gene Sets	6	R-HSA-2559584	GASTRITIS	Formation of Senescence-Associated Heterochromatin Foci (SAHF)	-2.2	7.8	4.3	30286	16	724	3	0.41	0.24	3007|3009|4001	H1-3|H1-5|LMNB1	-1.8
Reactome Gene Sets	6	R-HSA-72695	GC-NL	Formation of the ternary complex, and subsequently, the 43S complex	-2.6	3.8	3.9	30286	52	1076	7	0.65	0.25	1964|2197|6193|6209|6210|6233|6235	EIF1AX|FAU|RPS5|RPS15|RPS15A|RPS27A|RPS29	-1.8
Reactome Gene Sets	6	R-HSA-389960	EGC-L	Formation of tubulin folding intermediates by CCT/TriC	-3.4	6	5.1	30286	25	1217	6	0.49	0.2	10382|10575|10694|22948|81027|84617	TUBB4A|CCT4|CCT8|CCT5|TUBB1|TUBB6	-2.8
Reactome Gene Sets	6	R-HSA-400451	IM-LGD-L	Free fatty acids regulate insulin secretion	-2.3	8.2	4.4	30286	11	1012	3	0.3	0.17	2181|2776|5331	ACSL3|GNAQ|PLCB3	-1.9
Reactome Gene Sets	6	R-HSA-400451	GC-NL	Free fatty acids regulate insulin secretion	-2.2	7.7	4.3	30286	11	1076	3	0.28	0.16	2182|2776|5331	ACSL4|GNAQ|PLCB3	-1.5
Reactome Gene Sets	6	R-HSA-400451	EGC-L	Free fatty acids regulate insulin secretion	-4.4	11	7	30286	11	1217	5	0.41	0.18	2181|2182|2767|2776|5331	ACSL3|ACSL4|GNA11|GNAQ|PLCB3	-3.6
Reactome Gene Sets	6	R-HSA-418217	EGC-L	G beta:gamma signalling through PLC beta	-2.1	5	3.6	30286	20	1217	4	0.33	0.16	2788|5331|54331|55970	GNG7|PLCB3|GNG2|GNG12	-1.8
Reactome Gene Sets	6	R-HSA-69615	GASTRITIS	G1/S DNA Damage Checkpoints	-2.2	3.7	3.5	30286	68	724	6	0.83	0.34	472|5694|5695|5696|5699|5721	ATM|PSMB6|PSMB7|PSMB8|PSMB10|PSME2	-1.9
Reactome Gene Sets	6	R-HSA-69615	IM-LGD-L	G1/S DNA Damage Checkpoints	-2.1	3.1	3.2	30286	68	1012	7	0.69	0.26	472|5687|5692|5696|5699|5710|5721	ATM|PSMA6|PSMB4|PSMB8|PSMB10|PSMD4|PSME2	-1.8
Reactome Gene Sets	6	R-HSA-69206	GASTRITIS	G1/S Transition	-2.9	3.2	3.9	30286	131	724	10	1.4	0.43	983|4173|4175|5111|5694|5695|5696|5699|5721|6117	CDK1|MCM4|MCM6|PCNA|PSMB6|PSMB7|PSMB8|PSMB10|PSME2|RPA1	-2.4
Reactome Gene Sets	6	R-HSA-69206	EGC-L	G1/S Transition	-3.1	2.7	3.9	30286	131	1217	14	1.2	0.31	983|4171|4173|4174|4175|5111|5696|5699|5704|5710|5721|6117|6119|54107	CDK1|MCM2|MCM4|MCM5|MCM6|PCNA|PSMB8|PSMB10|PSMC4|PSMD4|PSME2|RPA1|RPA3|POLE3	-2.5
Reactome Gene Sets	6	R-HSA-69206	IM-LGD-L	G1/S Transition	-2.8	2.7	3.7	30286	131	1012	12	1.2	0.34	4171|4173|4174|4175|5111|5687|5692|5696|5699|5710|5721|6118	MCM2|MCM4|MCM5|MCM6|PCNA|PSMA6|PSMB4|PSMB8|PSMB10|PSMD4|PSME2|RPA2	-2.3
Reactome Gene Sets	6	R-HSA-69481	GASTRITIS	G2/M Checkpoints	-4.3	3.5	5.1	30286	167	724	14	1.9	0.51	472|983|4173|4175|4683|5694|5695|5696|5699|5721|5982|6117|7529|10111	ATM|CDK1|MCM4|MCM6|NBN|PSMB6|PSMB7|PSMB8|PSMB10|PSME2|RFC2|RPA1|YWHAB|RAD50	-3.5
Reactome Gene Sets	6	R-HSA-69481	EGC-L	G2/M Checkpoints	-3.8	2.7	4.5	30286	167	1217	18	1.5	0.35	983|4171|4173|4174|4175|4683|5696|5699|5704|5710|5721|5982|5984|6117|6119|7534|10111|128312	CDK1|MCM2|MCM4|MCM5|MCM6|NBN|PSMB8|PSMB10|PSMC4|PSMD4|PSME2|RFC2|RFC4|RPA1|RPA3|YWHAZ|RAD50|H2BC26	-3.1
Reactome Gene Sets	6	R-HSA-69481	IM-LGD-L	G2/M Checkpoints	-3.8	2.9	4.5	30286	167	1012	16	1.6	0.39	472|3014|4171|4173|4174|4175|4683|5687|5692|5696|5699|5710|5721|5982|6118|10111	ATM|H2AX|MCM2|MCM4|MCM5|MCM6|NBN|PSMA6|PSMB4|PSMB8|PSMB10|PSMD4|PSME2|RFC2|RPA2|RAD50	-3.1
Reactome Gene Sets	6	R-HSA-69473	GASTRITIS	G2/M DNA damage checkpoint	-2.1	3.1	3.2	30286	94	724	7	0.97	0.36	472|983|4683|5982|6117|7529|10111	ATM|CDK1|NBN|RFC2|RPA1|YWHAB|RAD50	-1.8
Reactome Gene Sets	6	R-HSA-69275	GASTRITIS	G2/M Transition	-2.1	2.3	2.9	30286	197	724	11	1.5	0.45	983|3320|3326|5048|5694|5695|5696|5699|5721|84617|203068	CDK1|HSP90AA1|HSP90AB1|PAFAH1B1|PSMB6|PSMB7|PSMB8|PSMB10|PSME2|TUBB6|TUBB	-1.8
Reactome Gene Sets	6	R-HSA-69275	EGC-L	G2/M Transition	-2.6	2.1	3.3	30286	197	1217	17	1.4	0.34	983|3320|3326|5048|5108|5577|5696|5699|5704|5710|5721|10121|10382|22919|81027|84617|203068	CDK1|HSP90AA1|HSP90AB1|PAFAH1B1|PCM1|PRKAR2B|PSMB8|PSMB10|PSMC4|PSMD4|PSME2|ACTR1A|TUBB4A|MAPRE1|TUBB1|TUBB6|TUBB	-2.1
Reactome Gene Sets	6	R-HSA-5696397	EGC-L	Gap-filling DNA repair synthesis and ligation in GG-NER	-6.5	9	8.1	30286	25	1217	9	0.74	0.25	5111|5424|5425|5982|5984|6117|6119|7515|54107	PCNA|POLD1|POLD2|RFC2|RFC4|RPA1|RPA3|XRCC1|POLE3	-5.4
Reactome Gene Sets	6	R-HSA-5696397	GC-NL	Gap-filling DNA repair synthesis and ligation in GG-NER	-4.7	7.9	6.6	30286	25	1076	7	0.65	0.25	5111|5424|5981|5982|5984|6233|54107	PCNA|POLD1|RFC1|RFC2|RFC4|RPS27A|POLE3	-3.4
Reactome Gene Sets	6	R-HSA-5696397	GASTRITIS	Gap-filling DNA repair synthesis and ligation in GG-NER	-2.6	6.7	4.5	30286	25	724	4	0.55	0.28	5111|5424|5982|6117	PCNA|POLD1|RFC2|RPA1	-2.1
Reactome Gene Sets	6	R-HSA-5696397	IM-LGD-L	Gap-filling DNA repair synthesis and ligation in GG-NER	-2.9	6	4.6	30286	25	1012	5	0.49	0.22	5111|5424|5425|5982|6118	PCNA|POLD1|POLD2|RFC2|RPA2	-2.4
Reactome Gene Sets	6	R-HSA-6782210	EGC-L	Gap-filling DNA repair synthesis and ligation in TC-NER	-6	5.1	6.7	30286	63	1217	13	1.1	0.29	5111|5424|5425|5434|5982|5984|6117|6119|6917|7515|7874|27339|54107	PCNA|POLD1|POLD2|POLR2E|RFC2|RFC4|RPA1|RPA3|TCEA1|XRCC1|USP7|PRPF19|POLE3	-4.9
Reactome Gene Sets	6	R-HSA-6782210	IM-LGD-L	Gap-filling DNA repair synthesis and ligation in TC-NER	-2.9	3.8	4.1	30286	63	1012	8	0.79	0.28	5111|5424|5425|5434|5982|6118|7874|27339	PCNA|POLD1|POLD2|POLR2E|RFC2|RPA2|USP7|PRPF19	-2.4
Reactome Gene Sets	6	R-HSA-6782210	GC-NL	Gap-filling DNA repair synthesis and ligation in TC-NER	-2.8	3.6	3.9	30286	63	1076	8	0.74	0.26	5111|5424|5434|5981|5982|5984|6233|54107	PCNA|POLD1|POLR2E|RFC1|RFC2|RFC4|RPS27A|POLE3	-1.9
Reactome Gene Sets	6	R-HSA-8950505	EGC-L	Gene and protein expression by JAK-STAT signaling after Interleukin-12 stimulation	-8.8	8.5	9.5	30286	38	1217	13	1.1	0.29	829|3185|3936|4001|4282|4478|5062|5721|6627|6888|9049|27250|552900	CAPZA1|HNRNPF|LCP1|LMNB1|MIF|MSN|PAK2|PSME2|SNRPA1|TALDO1|AIP|PDCD4|BOLA2	-7.5
Reactome Gene Sets	6	R-HSA-8950505	GASTRITIS	Gene and protein expression by JAK-STAT signaling after Interleukin-12 stimulation	-4.5	7.7	6.5	30286	38	724	7	0.97	0.36	829|3181|3936|4001|4478|5721|9049	CAPZA1|HNRNPA2B1|LCP1|LMNB1|MSN|PSME2|AIP	-3.7
Reactome Gene Sets	6	R-HSA-8950505	GC-NL	Gene and protein expression by JAK-STAT signaling after Interleukin-12 stimulation	-5.3	6.7	6.7	30286	38	1076	9	0.84	0.28	1265|3181|3936|4001|4478|5062|6627|9049|27250	CNN2|HNRNPA2B1|LCP1|LMNB1|MSN|PAK2|SNRPA1|AIP|PDCD4	-3.8
Reactome Gene Sets	6	R-HSA-8950505	IM-LGD-L	Gene and protein expression by JAK-STAT signaling after Interleukin-12 stimulation	-5.5	7.1	7	30286	38	1012	9	0.89	0.3	1072|3185|3313|3936|4001|5306|5721|9049|552900	CFL1|HNRNPF|HSPA9|LCP1|LMNB1|PITPNA|PSME2|AIP|BOLA2	-4.5
Reactome Gene Sets	6	R-HSA-202433	GASTRITIS	Generation of second messenger molecules	-2.9	6.2	4.7	30286	34	724	5	0.69	0.31	3115|3122|3123|3937|5336	HLA-DPB1|HLA-DRA|HLA-DRB1|LCP2|PLCG2	-2.4
Reactome Gene Sets	6	R-HSA-202433	GC-NL	Generation of second messenger molecules	-3.8	5.8	5.4	30286	34	1076	7	0.65	0.25	3115|3122|3127|3937|5062|5336|7454	HLA-DPB1|HLA-DRA|HLA-DRB5|LCP2|PAK2|PLCG2|WAS	-2.7
Reactome Gene Sets	6	R-HSA-202433	GC-L	Generation of second messenger molecules	-2.2	8	4.3	30286	34	336	3	0.89	0.51	3115|3122|3937	HLA-DPB1|HLA-DRA|LCP2	-1.8
Reactome Gene Sets	6	R-HSA-202433	IM-LGD-NL	Generation of second messenger molecules	-3.3	11	6	30286	34	333	4	1.2	0.6	3115|3122|5336|7454	HLA-DPB1|HLA-DRA|PLCG2|WAS	-2.3
Reactome Gene Sets	6	R-HSA-202433	EGC-NL	Generation of second messenger molecules	-3.5	22	7.8	30286	34	120	3	2.5	1.4	3115|3122|3937	HLA-DPB1|HLA-DRA|LCP2	-2.4
Reactome Gene Sets	6	R-HSA-5696399	EGC-L	Global Genome Nucleotide Excision Repair (GG-NER)	-4.5	3.9	5.4	30286	84	1217	13	1.1	0.29	142|5111|5424|5425|5982|5984|6117|6119|7329|7515|8607|54107|79913	PARP1|PCNA|POLD1|POLD2|RFC2|RFC4|RPA1|RPA3|UBE2I|XRCC1|RUVBL1|POLE3|ACTR5	-3.7
Reactome Gene Sets	6	R-HSA-5696399	GASTRITIS	Global Genome Nucleotide Excision Repair (GG-NER)	-2.4	3.5	3.6	30286	84	724	7	0.97	0.36	142|5111|5424|5982|6117|7329|79913	PARP1|PCNA|POLD1|RFC2|RPA1|UBE2I|ACTR5	-2
Reactome Gene Sets	6	R-HSA-5696399	GC-NL	Global Genome Nucleotide Excision Repair (GG-NER)	-3.1	3.4	4.1	30286	84	1076	10	0.93	0.29	142|5111|5424|5981|5982|5984|6233|7329|51138|54107	PARP1|PCNA|POLD1|RFC1|RFC2|RFC4|RPS27A|UBE2I|COPS4|POLE3	-2.1
Reactome Gene Sets	6	R-HSA-163359	EGC-L	Glucagon signaling in metabolic regulation	-2	3.8	3.3	30286	33	1217	5	0.41	0.18	2778|2788|5577|54331|55970	GNAS|GNG7|PRKAR2B|GNG2|GNG12	-1.7
Reactome Gene Sets	6	R-HSA-381676	EGC-L	Glucagon-like Peptide-1 (GLP1) regulates insulin secretion	-2.2	3.6	3.4	30286	42	1217	6	0.49	0.2	2778|2788|5577|8826|54331|55970	GNAS|GNG7|PRKAR2B|IQGAP1|GNG2|GNG12	-1.8
Reactome Gene Sets	6	R-HSA-420092	EGC-L	Glucagon-type ligand receptors	-2	3.8	3.3	30286	33	1217	5	0.41	0.18	2778|2788|7432|54331|55970	GNAS|GNG7|VIP|GNG2|GNG12	-1.7
Reactome Gene Sets	6	R-HSA-70263	EGC-L	Gluconeogenesis	-2.5	4.8	4	30286	26	1217	5	0.41	0.18	226|2023|2597|5091|8789	ALDOA|ENO1|GAPDH|PC|FBP2	-2
Reactome Gene Sets	6	R-HSA-70326	EGC-L	Glucose metabolism	-4.5	3.9	5.4	30286	84	1217	13	1.1	0.29	226|2023|2597|4927|5091|5214|5903|7175|8086|8480|8789|10762|53371	ALDOA|ENO1|GAPDH|NUP88|PC|PFKP|RANBP2|TPR|AAAS|RAE1|FBP2|NUP50|NUP54	-3.7
Reactome Gene Sets	6	R-HSA-70326	GC-NL	Glucose metabolism	-3.7	3.7	4.7	30286	84	1076	11	1	0.31	230|669|2203|3101|5091|5214|7175|8086|8480|8789|53371	ALDOC|BPGM|FBP1|HK3|PC|PFKP|TPR|AAAS|RAE1|FBP2|NUP54	-2.6
Reactome Gene Sets	6	R-HSA-70326	IM-LGD-L	Glucose metabolism	-2.2	2.9	3.2	30286	84	1012	8	0.79	0.28	669|3099|4927|5091|5214|8480|8789|10762	BPGM|HK2|NUP88|PC|PFKP|RAE1|FBP2|NUP50	-1.8
Reactome Gene Sets	6	R-HSA-8964539	GASTRITIS	Glutamate and glutamine metabolism	-3.6	12	6.4	30286	14	724	4	0.55	0.28	2746|2752|2806|4942	GLUD1|GLUL|GOT2|OAT	-2.9
Reactome Gene Sets	6	R-HSA-156590	GC-L	Glutathione conjugation	-2.1	7.5	4.1	30286	36	336	3	0.89	0.51	4257|4258|4259	MGST1|MGST2|MGST3	-1.8
Reactome Gene Sets	6	R-HSA-156590	EGC-L	Glutathione conjugation	-2.5	4.1	3.9	30286	36	1217	6	0.49	0.2	2940|4257|4258|4259|55748|79017	GSTA3|MGST1|MGST2|MGST3|CNDP2|GGCT	-2.1
Reactome Gene Sets	6	R-HSA-156590	IM-LGD-NL	Glutathione conjugation	-2.1	7.6	4.2	30286	36	333	3	0.9	0.52	2940|4259|55748	GSTA3|MGST3|CNDP2	-1.4
Reactome Gene Sets	6	R-HSA-1483206	IM-LGD-L	Glycerophospholipid biosynthesis	-3.4	3	4.3	30286	129	1012	13	1.3	0.35	1120|2819|2820|3030|3032|5130|8904|10809|23646|27132|55326|79887|100137049	CHKB|GPD1|GPD2|HADHA|HADHB|PCYT1A|CPNE1|STARD10|PLD3|CPNE7|AGPAT5|PLBD1|PLA2G4B	-2.8
Reactome Gene Sets	6	R-HSA-6783984	IM-LGD-L	Glycine degradation	-2.9	13	5.8	30286	7	1012	3	0.3	0.17	1743|2653|92259	DLST|GCSH|KGD4	-2.4
Reactome Gene Sets	6	R-HSA-6783984	GC-NL	Glycine degradation	-2.9	12	5.6	30286	7	1076	3	0.28	0.16	1743|2653|92259	DLST|GCSH|KGD4	-1.9
Reactome Gene Sets	6	R-HSA-6783984	EGC-L	Glycine degradation	-2.7	11	5.2	30286	7	1217	3	0.25	0.14	1743|2653|92259	DLST|GCSH|KGD4	-2.2
Reactome Gene Sets	6	R-HSA-6783984	GASTRITIS	Glycine degradation	-3.4	18	7	30286	7	724	3	0.41	0.24	1743|2653|92259	DLST|GCSH|KGD4	-2.7
Reactome Gene Sets	6	R-HSA-70221	GC-L	Glycogen breakdown (glycogenolysis)	-3.2	17	6.7	30286	16	336	3	0.89	0.51	178|2992|5836	AGL|GYG1|PYGL	-2.6
Reactome Gene Sets	6	R-HSA-70221	GASTRITIS	Glycogen breakdown (glycogenolysis)	-2.2	7.8	4.3	30286	16	724	3	0.41	0.24	178|2992|5261	AGL|GYG1|PHKG2	-1.8
Reactome Gene Sets	6	R-HSA-70221	GC-NL	Glycogen breakdown (glycogenolysis)	-2.7	7	4.6	30286	16	1076	4	0.37	0.19	178|2992|5261|5836	AGL|GYG1|PHKG2|PYGL	-1.8
Reactome Gene Sets	6	R-HSA-8982491	GASTRITIS	Glycogen metabolism	-2.4	6.2	4.2	30286	27	724	4	0.55	0.28	178|2992|5261|7360	AGL|GYG1|PHKG2|UGP2	-2
Reactome Gene Sets	6	R-HSA-8982491	GC-NL	Glycogen metabolism	-2.6	5.2	4.2	30286	27	1076	5	0.46	0.21	178|2992|5261|5836|6233	AGL|GYG1|PHKG2|PYGL|RPS27A	-1.8
Reactome Gene Sets	6	R-HSA-8982491	GC-L	Glycogen metabolism	-2.5	10	5	30286	27	336	3	0.89	0.51	178|2992|5836	AGL|GYG1|PYGL	-2.1
Reactome Gene Sets	6	R-HSA-70171	EGC-L	Glycolysis	-3.8	3.7	4.8	30286	73	1217	11	0.9	0.27	226|2023|2597|4927|5214|5903|7175|8086|8480|10762|53371	ALDOA|ENO1|GAPDH|NUP88|PFKP|RANBP2|TPR|AAAS|RAE1|NUP50|NUP54	-3.1
Reactome Gene Sets	6	R-HSA-70171	GC-NL	Glycolysis	-2.4	3.1	3.4	30286	73	1076	8	0.74	0.26	230|669|3101|5214|7175|8086|8480|53371	ALDOC|BPGM|HK3|PFKP|TPR|AAAS|RAE1|NUP54	-1.6
Reactome Gene Sets	6	R-HSA-389661	GASTRITIS	Glyoxylate metabolism and glycine degradation	-3	8.8	5.3	30286	19	724	4	0.55	0.28	1743|2653|2806|92259	DLST|GCSH|GOT2|KGD4	-2.5
Reactome Gene Sets	6	R-HSA-389661	GC-NL	Glyoxylate metabolism and glycine degradation	-3.4	7.4	5.4	30286	19	1076	5	0.46	0.21	1743|2653|2806|9380|92259	DLST|GCSH|GOT2|GRHPR|KGD4	-2.3
Reactome Gene Sets	6	R-HSA-389661	IM-LGD-L	Glyoxylate metabolism and glycine degradation	-2.5	6.3	4.3	30286	19	1012	4	0.4	0.2	1743|2653|2806|92259	DLST|GCSH|GOT2|KGD4	-2.1
Reactome Gene Sets	6	R-HSA-389661	EGC-L	Glyoxylate metabolism and glycine degradation	-2.2	5.2	3.8	30286	19	1217	4	0.33	0.16	1743|2653|2806|92259	DLST|GCSH|GOT2|KGD4	-1.8
Reactome Gene Sets	6	R-HSA-432722	GC-NL	Golgi Associated Vesicle Biogenesis	-5.4	5.5	6.5	30286	56	1076	11	1	0.31	164|1174|1213|2512|6844|7037|8546|8673|9026|10053|81567	AP1G1|AP1S1|CLTC|FTL|VAMP2|TFRC|AP3B1|VAMP8|HIP1R|AP1M2|TXNDC5	-4
Reactome Gene Sets	6	R-HSA-432722	GC-L	Golgi Associated Vesicle Biogenesis	-2.5	6.4	4.3	30286	56	336	4	1.2	0.59	1174|6456|10053|81567	AP1S1|SH3GL2|AP1M2|TXNDC5	-2
Reactome Gene Sets	6	R-HSA-432722	GASTRITIS	Golgi Associated Vesicle Biogenesis	-2.7	4.5	4.1	30286	56	724	6	0.83	0.34	1174|6456|7037|9026|10053|81567	AP1S1|SH3GL2|TFRC|HIP1R|AP1M2|TXNDC5	-2.2
Reactome Gene Sets	6	R-HSA-432722	EGC-L	Golgi Associated Vesicle Biogenesis	-2.8	3.6	3.9	30286	56	1217	8	0.66	0.23	164|1174|3312|6844|7037|8546|9026|10053	AP1G1|AP1S1|HSPA8|VAMP2|TFRC|AP3B1|HIP1R|AP1M2	-2.3
Reactome Gene Sets	6	R-HSA-432722	IM-LGD-NL	Golgi Associated Vesicle Biogenesis	-2.5	6.5	4.3	30286	56	333	4	1.2	0.6	1174|7037|10053|81567	AP1S1|TFRC|AP1M2|TXNDC5	-1.6
Reactome Gene Sets	6	R-HSA-432722	IM-LGD-L	Golgi Associated Vesicle Biogenesis	-4.8	5.3	6	30286	56	1012	10	0.99	0.31	164|1174|3312|5878|6844|7037|9026|55330|64746|81567	AP1G1|AP1S1|HSPA8|RAB5C|VAMP2|TFRC|HIP1R|BLOC1S4|ACBD3|TXNDC5	-3.9
Reactome Gene Sets	6	R-HSA-8856688	EGC-L	Golgi-to-ER retrograde transport	-6.4	3.7	6.5	30286	133	1217	20	1.6	0.36	378|381|829|1783|2590|5048|5050|9554|10121|10382|10972|23423|26958|51594|53407|54732|55850|55860|81027|84617	ARF4|ARF5|CAPZA1|DYNC1LI2|GALNT2|PAFAH1B1|PAFAH1B3|SEC22B|ACTR1A|TUBB4A|TMED10|TMED3|COPG2|NBAS|STX18|TMED9|USE1|ACTR10|TUBB1|TUBB6	-5.3
Reactome Gene Sets	6	R-HSA-202040	EGC-L	G-protein activation	-2.6	5.2	4.2	30286	24	1217	5	0.41	0.18	2767|2776|2788|54331|55970	GNA11|GNAQ|GNG7|GNG2|GNG12	-2.2
Reactome Gene Sets	6	R-HSA-202040	IM-LGD-NL	G-protein activation	-2.6	11	5.4	30286	24	333	3	0.9	0.52	2767|2776|55970	GNA11|GNAQ|GNG12	-1.8
Reactome Gene Sets	6	R-HSA-112040	EGC-L	G-protein mediated events	-2.2	3.1	3.2	30286	56	1217	7	0.58	0.22	156|2767|2776|3838|5331|5577|5580	GRK2|GNA11|GNAQ|KPNA2|PLCB3|PRKAR2B|PRKCD	-1.8
Reactome Gene Sets	6	R-HSA-114604	GASTRITIS	GPVI-mediated activation cascade	-3.8	7.2	5.7	30286	35	724	6	0.83	0.34	391|3937|4067|5336|5777|5880	RHOG|LCP2|LYN|PLCG2|PTPN6|RAC2	-3.1
Reactome Gene Sets	6	R-HSA-114604	GC-NL	GPVI-mediated activation cascade	-2.9	4.8	4.3	30286	35	1076	6	0.56	0.23	391|3937|4067|5336|5777|5880	RHOG|LCP2|LYN|PLCG2|PTPN6|RAC2	-2
Reactome Gene Sets	6	R-HSA-114604	IM-LGD-NL	GPVI-mediated activation cascade	-2.2	7.8	4.2	30286	35	333	3	0.9	0.52	5336|5777|5880	PLCG2|PTPN6|RAC2	-1.4
Reactome Gene Sets	6	R-HSA-114604	EGC-L	GPVI-mediated activation cascade	-2.6	4.3	4	30286	35	1217	6	0.49	0.2	388|1277|3937|4067|5777|5880	RHOB|COL1A1|LCP2|LYN|PTPN6|RAC2	-2.1
Reactome Gene Sets	6	R-HSA-354194	GC-NL	GRB2:SOS provides linkage to MAPK signaling for Integrins	-2.8	7.5	4.8	30286	15	1076	4	0.37	0.19	2243|2244|7094|7450	FGA|FGB|TLN1|VWF	-1.9
Reactome Gene Sets	6	R-HSA-354194	EGC-L	GRB2:SOS provides linkage to MAPK signaling for Integrins	-2.6	6.6	4.5	30286	15	1217	4	0.33	0.16	2243|2244|3674|7094	FGA|FGB|ITGA2B|TLN1	-2.1
Reactome Gene Sets	6	R-HSA-354194	IM-LGD-L	GRB2:SOS provides linkage to MAPK signaling for Integrins	-2.9	8	5	30286	15	1012	4	0.4	0.2	2243|2244|3674|7450	FGA|FGB|ITGA2B|VWF	-2.4
Reactome Gene Sets	6	R-HSA-9762114	GASTRITIS	GSK3B and BTRC:CUL1-mediated-degradation of NFE2L2	-2.1	4	3.4	30286	52	724	5	0.69	0.31	5694|5695|5696|5699|5721	PSMB6|PSMB7|PSMB8|PSMB10|PSME2	-1.8
Reactome Gene Sets	6	R-HSA-9762114	IM-LGD-L	GSK3B and BTRC:CUL1-mediated-degradation of NFE2L2	-2.1	3.5	3.3	30286	52	1012	6	0.59	0.24	5687|5692|5696|5699|5710|5721	PSMA6|PSMB4|PSMB8|PSMB10|PSMD4|PSME2	-1.8
Reactome Gene Sets	6	R-HSA-72706	GC-NL	GTP hydrolysis and joining of the 60S ribosomal subunit	-3.7	3.2	4.6	30286	113	1076	13	1.2	0.33	1964|2197|4736|6146|6169|6170|6193|6209|6210|6233|6235|9349|23521	EIF1AX|FAU|RPL10A|RPL22|RPL38|RPL39|RPS5|RPS15|RPS15A|RPS27A|RPS29|RPL23|RPL13A	-2.6
Reactome Gene Sets	6	R-HSA-72706	EGC-L	GTP hydrolysis and joining of the 60S ribosomal subunit	-4.3	3.3	5	30286	113	1217	15	1.2	0.32	1968|1973|4736|6122|6134|6135|6136|6139|6146|6188|6193|6210|6231|8894|23521	EIF2S3|EIF4A1|RPL10A|RPL3|RPL10|RPL11|RPL12|RPL17|RPL22|RPS3|RPS5|RPS15A|RPS26|EIF2S2|RPL13A	-3.5
Reactome Gene Sets	6	R-HSA-9609690	EGC-L	HCMV Early Events	-3.4	2.8	4.2	30286	135	1217	15	1.2	0.32	1783|4927|5903|5931|7175|8086|8480|10155|10382|10762|53371|79718|81027|84617|128312	DYNC1LI2|NUP88|RANBP2|RBBP7|TPR|AAAS|RAE1|TRIM28|TUBB4A|NUP50|NUP54|TBL1XR1|TUBB1|TUBB6|H2BC26	-2.8
Reactome Gene Sets	6	R-HSA-9609646	EGC-L	HCMV Infection	-3.1	2.5	3.9	30286	160	1217	16	1.3	0.33	1783|4927|5903|5931|7175|8086|8480|10155|10382|10762|53371|79718|81027|84617|128312|128866	DYNC1LI2|NUP88|RANBP2|RBBP7|TPR|AAAS|RAE1|TRIM28|TUBB4A|NUP50|NUP54|TBL1XR1|TUBB1|TUBB6|H2BC26|CHMP4B	-2.6
Reactome Gene Sets	6	R-HSA-8964058	IM-LGD-L	HDL remodeling	-3.7	12	6.5	30286	10	1012	4	0.4	0.2	335|344|345|348	APOA1|APOC2|APOC3|APOE	-3
Reactome Gene Sets	6	R-HSA-8964058	EGC-L	HDL remodeling	-3.3	10	5.8	30286	10	1217	4	0.33	0.16	335|344|345|348	APOA1|APOC2|APOC3|APOE	-2.7
Reactome Gene Sets	6	R-HSA-8964058	GC-NL	HDL remodeling	-2.4	8.4	4.5	30286	10	1076	3	0.28	0.16	344|345|348	APOC2|APOC3|APOE	-1.6
Reactome Gene Sets	6	R-HSA-5685942	GASTRITIS	HDR through Homologous Recombination (HRR)	-2.9	4.2	4.2	30286	70	724	7	0.97	0.36	472|4683|5111|5424|5982|6117|10111	ATM|NBN|PCNA|POLD1|RFC2|RPA1|RAD50	-2.3
Reactome Gene Sets	6	R-HSA-5685942	EGC-L	HDR through Homologous Recombination (HRR)	-3.3	3.6	4.4	30286	70	1217	10	0.82	0.26	4683|5111|5424|5425|5982|5984|6117|6119|10111|54107	NBN|PCNA|POLD1|POLD2|RFC2|RFC4|RPA1|RPA3|RAD50|POLE3	-2.7
Reactome Gene Sets	6	R-HSA-5685942	IM-LGD-L	HDR through Homologous Recombination (HRR)	-2.6	3.4	3.8	30286	70	1012	8	0.79	0.28	472|4683|5111|5424|5425|5982|6118|10111	ATM|NBN|PCNA|POLD1|POLD2|RFC2|RPA2|RAD50	-2.2
Reactome Gene Sets	6	R-HSA-5685942	GC-NL	HDR through Homologous Recombination (HRR)	-2.5	3.2	3.6	30286	70	1076	8	0.74	0.26	4683|5111|5424|5981|5982|5984|6233|54107	NBN|PCNA|POLD1|RFC1|RFC2|RFC4|RPS27A|POLE3	-1.7
Reactome Gene Sets	6	R-HSA-5693567	EGC-L	HDR through Homologous Recombination (HRR) or Single Strand Annealing (SSA)	-2.5	2.4	3.4	30286	134	1217	13	1.1	0.29	4683|5111|5424|5425|5982|5984|6117|6119|7329|10111|54107|128312|151987	NBN|PCNA|POLD1|POLD2|RFC2|RFC4|RPA1|RPA3|UBE2I|RAD50|POLE3|H2BC26|PPP4R2	-2.1
Reactome Gene Sets	6	R-HSA-5685939	EGC-L	HDR through MMEJ (alt-NHEJ)	-4.2	10	6.6	30286	12	1217	5	0.41	0.18	142|2237|4683|7515|10111	PARP1|FEN1|NBN|XRCC1|RAD50	-3.4
Reactome Gene Sets	6	R-HSA-5685939	GASTRITIS	HDR through MMEJ (alt-NHEJ)	-3.9	14	7	30286	12	724	4	0.55	0.28	142|2237|4683|10111	PARP1|FEN1|NBN|RAD50	-3.1
Reactome Gene Sets	6	R-HSA-5685939	GC-NL	HDR through MMEJ (alt-NHEJ)	-2.1	7	4	30286	12	1076	3	0.28	0.16	142|2237|4683	PARP1|FEN1|NBN	-1.4
Reactome Gene Sets	6	R-HSA-5685938	GASTRITIS	HDR through Single Strand Annealing (SSA)	-2.7	5.7	4.4	30286	37	724	5	0.69	0.31	472|4683|5982|6117|10111	ATM|NBN|RFC2|RPA1|RAD50	-2.3
Reactome Gene Sets	6	R-HSA-5685938	EGC-L	HDR through Single Strand Annealing (SSA)	-2.5	4	3.8	30286	37	1217	6	0.49	0.2	4683|5982|5984|6117|6119|10111	NBN|RFC2|RFC4|RPA1|RPA3|RAD50	-2
Reactome Gene Sets	6	R-HSA-5685938	IM-LGD-L	HDR through Single Strand Annealing (SSA)	-2.1	4	3.4	30286	37	1012	5	0.49	0.22	472|4683|5982|6118|10111	ATM|NBN|RFC2|RPA2|RAD50	-1.8
Reactome Gene Sets	6	R-HSA-5358346	GASTRITIS	Hedgehog ligand biogenesis	-2.3	3.9	3.6	30286	65	724	6	0.83	0.34	5694|5695|5696|5699|5721|7415	PSMB6|PSMB7|PSMB8|PSMB10|PSME2|VCP	-1.9
Reactome Gene Sets	6	R-HSA-189483	GC-NL	Heme degradation	-2.8	7.5	4.8	30286	15	1076	4	0.37	0.19	644|2168|3162|3163	BLVRA|FABP1|HMOX1|HMOX2	-1.9
Reactome Gene Sets	6	R-HSA-109582	GC-NL	Hemostasis	-11	2.6	7.9	30286	622	1076	58	5.4	0.69	1|2|338|391|710|960|1445|1606|1893|2147|2165|2243|2244|2316|2626|2776|2788|3273|3673|3678|3684|3685|3689|3699|3937|4067|4072|5004|5051|5265|5269|5336|5340|5341|5473|5580|5627|5657|5768|5770|5777|5880|6281|6678|6786|7057|7094|7450|7525|9927|10544|23303|50808|51097|51706|83706|84617|139322	A1BG|A2M|APOB|RHOG|SERPING1|CD44|CSK|DGKA|ECM1|F2|F13B|FGA|FGB|FLNA|GATA4|GNAQ|GNG7|HRG|ITGA2|ITGA5|ITGAM|ITGAV|ITGB2|ITIH3|LCP2|LYN|EPCAM|ORM1|PAFAH2|SERPINA1|SERPINB6|PLCG2|PLG|PLEK|PPBP|PRKCD|PROS1|PRTN3|QSOX1|PTPN1|PTPN6|RAC2|S100A10|SPARC|STIM1|THBS1|TLN1|VWF|YES1|MFN2|PROCR|KIF13B|AK3|SCCPDH|CYB5R1|FERMT3|TUBB6|APOOL	-8.7
Reactome Gene Sets	6	R-HSA-109582	GASTRITIS	Hemostasis	-5.5	2.4	5.3	30286	622	724	35	4.8	0.8	391|829|960|1445|1606|1794|2162|2776|3309|3512|3689|3937|4067|5005|5051|5267|5269|5336|5341|5657|5770|5777|5880|7094|7450|7873|8140|10544|23468|30845|50808|51706|83706|84617|139322	RHOG|CAPZA1|CD44|CSK|DGKA|DOCK2|F13A1|GNAQ|HSPA5|JCHAIN|ITGB2|LCP2|LYN|ORM2|PAFAH2|SERPINA4|SERPINB6|PLCG2|PLEK|PRTN3|PTPN1|PTPN6|RAC2|TLN1|VWF|MANF|SLC7A5|PROCR|CBX5|EHD3|AK3|CYB5R1|FERMT3|TUBB6|APOOL	-4.5
Reactome Gene Sets	6	R-HSA-109582	GC-L	Hemostasis	-4.1	2.8	4.7	30286	622	336	19	5.7	1.3	960|2767|3678|3689|3937|5341|5657|5770|5777|6678|7450|7873|9927|10544|30845|51097|51706|55605|139322	CD44|GNA11|ITGA5|ITGB2|LCP2|PLEK|PRTN3|PTPN1|PTPN6|SPARC|VWF|MANF|MFN2|PROCR|EHD3|SCCPDH|CYB5R1|KIF21A|APOOL	-3.3
Reactome Gene Sets	6	R-HSA-109582	IM-LGD-NL	Hemostasis	-7.5	3.7	7.1	30286	622	333	25	7.5	1.4	1445|1606|2767|2776|3512|3684|3689|3699|4072|5336|5657|5777|5880|6810|7057|7094|7450|10544|23186|51097|51706|55605|55970|81027|83706	CSK|DGKA|GNA11|GNAQ|JCHAIN|ITGAM|ITGB2|ITIH3|EPCAM|PLCG2|PRTN3|PTPN6|RAC2|STX4|THBS1|TLN1|VWF|PROCR|RCOR1|SCCPDH|CYB5R1|KIF21A|GNG12|TUBB1|FERMT3	-5.8
Reactome Gene Sets	6	R-HSA-109582	IM-LGD-L	Hemostasis	-17	3.3	11	30286	622	1012	68	6.7	0.79	1|2|12|197|335|338|710|960|1072|1191|1445|1606|1893|2147|2161|2165|2243|2244|2776|2778|2783|3045|3053|3273|3512|3655|3672|3673|3674|3684|3689|3699|3818|4067|4072|4893|5004|5005|5216|5265|5269|5340|5473|5627|5657|5777|5868|5880|6281|6786|7018|7057|7076|7450|7873|8140|9927|10447|23052|23303|50808|51097|51706|55605|57406|64837|83706|139322	A1BG|A2M|SERPINA3|AHSG|APOA1|APOB|SERPING1|CD44|CFL1|CLU|CSK|DGKA|ECM1|F2|F12|F13B|FGA|FGB|GNAQ|GNAS|GNB2|HBD|SERPIND1|HRG|JCHAIN|ITGA6|ITGA1|ITGA2|ITGA2B|ITGAM|ITGB2|ITIH3|KLKB1|LYN|EPCAM|NRAS|ORM1|ORM2|PFN1|SERPINA1|SERPINB6|PLG|PPBP|PROS1|PRTN3|PTPN6|RAB5A|RAC2|S100A10|STIM1|TF|THBS1|TIMP1|VWF|MANF|SLC7A5|MFN2|FAM3C|ENDOD1|KIF13B|AK3|SCCPDH|CYB5R1|KIF21A|ABHD6|KLC2|FERMT3|APOOL	-15
Reactome Gene Sets	6	R-HSA-109582	EGC-L	Hemostasis	-11	2.6	8	30286	622	1217	64	5.3	0.64	1|2|226|335|338|388|710|829|960|1277|1445|1606|2162|2165|2243|2244|2767|2776|2778|2788|3273|3655|3674|3684|3689|3699|3937|4067|4072|4282|5216|5269|5340|5473|5577|5580|5627|5657|5768|5770|5777|5880|6281|6678|6786|7018|7057|7094|7534|9927|10382|10544|23186|30845|50808|51097|51706|54331|54495|55970|81027|83706|84617|139322	A1BG|A2M|ALDOA|APOA1|APOB|RHOB|SERPING1|CAPZA1|CD44|COL1A1|CSK|DGKA|F13A1|F13B|FGA|FGB|GNA11|GNAQ|GNAS|GNG7|HRG|ITGA6|ITGA2B|ITGAM|ITGB2|ITIH3|LCP2|LYN|EPCAM|MIF|PFN1|SERPINB6|PLG|PPBP|PRKAR2B|PRKCD|PROS1|PRTN3|QSOX1|PTPN1|PTPN6|RAC2|S100A10|SPARC|STIM1|TF|THBS1|TLN1|YWHAZ|MFN2|TUBB4A|PROCR|RCOR1|EHD3|AK3|SCCPDH|CYB5R1|GNG2|TMX3|GNG12|TUBB1|FERMT3|TUBB6|APOOL	-9.6
Reactome Gene Sets	6	R-HSA-5387390	GASTRITIS	Hh mutants abrogate ligand secretion	-2.6	4.3	3.9	30286	59	724	6	0.83	0.34	5694|5695|5696|5699|5721|7415	PSMB6|PSMB7|PSMB8|PSMB10|PSME2|VCP	-2.1
Reactome Gene Sets	6	R-HSA-5362768	GASTRITIS	Hh mutants are degraded by ERAD	-2.7	4.5	4.1	30286	56	724	6	0.83	0.34	5694|5695|5696|5699|5721|7415	PSMB6|PSMB7|PSMB8|PSMB10|PSME2|VCP	-2.2
Reactome Gene Sets	6	R-HSA-167287	EGC-L	HIV elongation arrest and recovery	-4.4	6	5.9	30286	33	1217	8	0.66	0.23	2962|2963|5434|6749|6829|6917|6923|11198	GTF2F1|GTF2F2|POLR2E|SSRP1|SUPT5H|TCEA1|ELOB|SUPT16H	-3.6
Reactome Gene Sets	6	R-HSA-167287	GASTRITIS	HIV elongation arrest and recovery	-3	6.3	4.8	30286	33	724	5	0.69	0.31	2963|6749|6827|11198|25920	GTF2F2|SSRP1|SUPT4H1|SUPT16H|NELFB	-2.4
Reactome Gene Sets	6	R-HSA-167287	GC-NL	HIV elongation arrest and recovery	-3	5.1	4.5	30286	33	1076	6	0.56	0.23	2962|2963|5434|6749|11198|25920	GTF2F1|GTF2F2|POLR2E|SSRP1|SUPT16H|NELFB	-2.1
Reactome Gene Sets	6	R-HSA-167287	IM-LGD-L	HIV elongation arrest and recovery	-2.3	4.5	3.8	30286	33	1012	5	0.49	0.22	2962|2963|5434|6749|6829	GTF2F1|GTF2F2|POLR2E|SSRP1|SUPT5H	-1.9
Reactome Gene Sets	6	R-HSA-162906	IM-LGD-L	HIV Infection	-9	3.8	7.8	30286	231	1012	29	2.9	0.52	164|291|292|293|1174|2958|2962|2963|4927|5434|5687|5692|5696|5699|5710|5721|5901|5902|5905|6749|6829|7520|8480|9525|10762|11168|29082|51510|128866	AP1G1|SLC25A4|SLC25A5|SLC25A6|AP1S1|GTF2A2|GTF2F1|GTF2F2|NUP88|POLR2E|PSMA6|PSMB4|PSMB8|PSMB10|PSMD4|PSME2|RAN|RANBP1|RANGAP1|SSRP1|SUPT5H|XRCC5|RAE1|VPS4B|NUP50|PSIP1|CHMP4A|CHMP5|CHMP4B	-7.6
Reactome Gene Sets	6	R-HSA-162906	GASTRITIS	HIV Infection	-6.7	3.8	6.7	30286	231	724	21	2.9	0.62	292|1174|1794|2237|2963|3837|5694|5695|5696|5699|5721|5901|6749|6827|7175|8480|9844|10053|11198|25920|25978	SLC25A5|AP1S1|DOCK2|FEN1|GTF2F2|KPNB1|PSMB6|PSMB7|PSMB8|PSMB10|PSME2|RAN|SSRP1|SUPT4H1|TPR|RAE1|ELMO1|AP1M2|SUPT16H|NELFB|CHMP2B	-5.6
Reactome Gene Sets	6	R-HSA-162906	GC-NL	HIV Infection	-7.2	3.3	6.7	30286	231	1076	27	2.5	0.48	164|291|292|293|1104|1173|1174|2237|2547|2962|2963|5062|5434|5695|5704|5901|6233|6749|7175|8086|8480|9844|10053|11168|11198|25920|53371	AP1G1|SLC25A4|SLC25A5|SLC25A6|RCC1|AP2M1|AP1S1|FEN1|XRCC6|GTF2F1|GTF2F2|PAK2|POLR2E|PSMB7|PSMC4|RAN|RPS27A|SSRP1|TPR|AAAS|RAE1|ELMO1|AP1M2|PSIP1|SUPT16H|NELFB|NUP54	-5.5
Reactome Gene Sets	6	R-HSA-162906	GC-L	HIV Infection	-3.6	3.9	4.7	30286	231	336	10	3	0.93	292|293|1174|2962|2963|4836|5696|5699|5721|10053	SLC25A5|SLC25A6|AP1S1|GTF2F1|GTF2F2|NMT1|PSMB8|PSMB10|PSME2|AP1M2	-2.9
Reactome Gene Sets	6	R-HSA-162906	EGC-L	HIV Infection	-11	3.9	9	30286	231	1217	36	3	0.49	164|291|292|293|1104|1173|1174|2237|2962|2963|3837|4927|5062|5434|5696|5699|5704|5710|5721|5901|5902|5903|5905|6749|6829|6917|6923|7175|8086|8148|8480|10053|10762|11198|53371|128866	AP1G1|SLC25A4|SLC25A5|SLC25A6|RCC1|AP2M1|AP1S1|FEN1|GTF2F1|GTF2F2|KPNB1|NUP88|PAK2|POLR2E|PSMB8|PSMB10|PSMC4|PSMD4|PSME2|RAN|RANBP1|RANBP2|RANGAP1|SSRP1|SUPT5H|TCEA1|ELOB|TPR|AAAS|TAF15|RAE1|AP1M2|NUP50|SUPT16H|NUP54|CHMP4B	-9.9
Reactome Gene Sets	6	R-HSA-162587	EGC-L	HIV Life Cycle	-6.9	3.7	6.7	30286	149	1217	22	1.8	0.38	1104|2237|2962|2963|4927|5434|5901|5902|5903|5905|6749|6829|6917|6923|7175|8086|8148|8480|10762|11198|53371|128866	RCC1|FEN1|GTF2F1|GTF2F2|NUP88|POLR2E|RAN|RANBP1|RANBP2|RANGAP1|SSRP1|SUPT5H|TCEA1|ELOB|TPR|AAAS|TAF15|RAE1|NUP50|SUPT16H|NUP54|CHMP4B	-5.7
Reactome Gene Sets	6	R-HSA-162587	GC-NL	HIV Life Cycle	-4.1	3	4.7	30286	149	1076	16	1.5	0.37	1104|2237|2547|2962|2963|5434|5901|6233|6749|7175|8086|8480|11168|11198|25920|53371	RCC1|FEN1|XRCC6|GTF2F1|GTF2F2|POLR2E|RAN|RPS27A|SSRP1|TPR|AAAS|RAE1|PSIP1|SUPT16H|NELFB|NUP54	-2.9
Reactome Gene Sets	6	R-HSA-162587	GASTRITIS	HIV Life Cycle	-2.5	2.8	3.5	30286	149	724	10	1.4	0.43	2237|2963|5901|6749|6827|7175|8480|11198|25920|25978	FEN1|GTF2F2|RAN|SSRP1|SUPT4H1|TPR|RAE1|SUPT16H|NELFB|CHMP2B	-2.1
Reactome Gene Sets	6	R-HSA-162587	IM-LGD-L	HIV Life Cycle	-5.6	3.6	6	30286	149	1012	18	1.8	0.42	2958|2962|2963|4927|5434|5901|5902|5905|6749|6829|7520|8480|9525|10762|11168|29082|51510|128866	GTF2A2|GTF2F1|GTF2F2|NUP88|POLR2E|RAN|RANBP1|RANGAP1|SSRP1|SUPT5H|XRCC5|RAE1|VPS4B|NUP50|PSIP1|CHMP4A|CHMP5|CHMP4B	-4.6
Reactome Gene Sets	6	R-HSA-167169	EGC-L	HIV Transcription Elongation	-3.6	4.6	4.9	30286	43	1217	8	0.66	0.23	2962|2963|5434|6749|6829|6917|6923|11198	GTF2F1|GTF2F2|POLR2E|SSRP1|SUPT5H|TCEA1|ELOB|SUPT16H	-2.9
Reactome Gene Sets	6	R-HSA-167169	GC-NL	HIV Transcription Elongation	-2.4	3.9	3.7	30286	43	1076	6	0.56	0.23	2962|2963|5434|6749|11198|25920	GTF2F1|GTF2F2|POLR2E|SSRP1|SUPT16H|NELFB	-1.6
Reactome Gene Sets	6	R-HSA-167169	GASTRITIS	HIV Transcription Elongation	-2.5	4.9	4	30286	43	724	5	0.69	0.31	2963|6749|6827|11198|25920	GTF2F2|SSRP1|SUPT4H1|SUPT16H|NELFB	-2
Reactome Gene Sets	6	R-HSA-5693579	GASTRITIS	Homologous DNA Pairing and Strand Exchange	-2.5	4.9	4	30286	43	724	5	0.69	0.31	472|4683|5982|6117|10111	ATM|NBN|RFC2|RPA1|RAD50	-2
Reactome Gene Sets	6	R-HSA-5693579	EGC-L	Homologous DNA Pairing and Strand Exchange	-2.1	3.5	3.3	30286	43	1217	6	0.49	0.2	4683|5982|5984|6117|6119|10111	NBN|RFC2|RFC4|RPA1|RPA3|RAD50	-1.8
Reactome Gene Sets	6	R-HSA-5693538	GASTRITIS	Homology Directed Repair	-2.7	3	3.7	30286	140	724	10	1.4	0.43	142|472|2237|4683|5111|5424|5982|6117|7329|10111	PARP1|ATM|FEN1|NBN|PCNA|POLD1|RFC2|RPA1|UBE2I|RAD50	-2.2
Reactome Gene Sets	6	R-HSA-5693538	EGC-L	Homology Directed Repair	-3.8	2.8	4.5	30286	140	1217	16	1.3	0.33	142|2237|4683|5111|5424|5425|5982|5984|6117|6119|7329|7515|10111|54107|128312|151987	PARP1|FEN1|NBN|PCNA|POLD1|POLD2|RFC2|RFC4|RPA1|RPA3|UBE2I|XRCC1|RAD50|POLE3|H2BC26|PPP4R2	-3.1
Reactome Gene Sets	6	R-HSA-162909	EGC-L	Host Interactions of HIV factors	-11	5	9.3	30286	130	1217	26	2.1	0.41	164|291|292|293|1104|1173|1174|3837|4927|5062|5696|5699|5704|5710|5721|5901|5902|5903|5905|6923|7175|8086|8480|10053|10762|53371	AP1G1|SLC25A4|SLC25A5|SLC25A6|RCC1|AP2M1|AP1S1|KPNB1|NUP88|PAK2|PSMB8|PSMB10|PSMC4|PSMD4|PSME2|RAN|RANBP1|RANBP2|RANGAP1|ELOB|TPR|AAAS|RAE1|AP1M2|NUP50|NUP54	-9.5
Reactome Gene Sets	6	R-HSA-162909	GC-NL	Host Interactions of HIV factors	-6.7	4.1	6.8	30286	130	1076	19	1.8	0.4	164|291|292|293|1104|1173|1174|5062|5695|5704|5901|6233|7175|8086|8480|9844|10053|11168|53371	AP1G1|SLC25A4|SLC25A5|SLC25A6|RCC1|AP2M1|AP1S1|PAK2|PSMB7|PSMC4|RAN|RPS27A|TPR|AAAS|RAE1|ELMO1|AP1M2|PSIP1|NUP54	-5.2
Reactome Gene Sets	6	R-HSA-162909	GASTRITIS	Host Interactions of HIV factors	-5.5	4.5	6.3	30286	130	724	14	1.9	0.51	292|1174|1794|3837|5694|5695|5696|5699|5721|5901|7175|8480|9844|10053	SLC25A5|AP1S1|DOCK2|KPNB1|PSMB6|PSMB7|PSMB8|PSMB10|PSME2|RAN|TPR|RAE1|ELMO1|AP1M2	-4.6
Reactome Gene Sets	6	R-HSA-162909	IM-LGD-L	Host Interactions of HIV factors	-6.5	4.1	6.7	30286	130	1012	18	1.8	0.42	164|291|292|293|1174|4927|5687|5692|5696|5699|5710|5721|5901|5902|5905|8480|10762|11168	AP1G1|SLC25A4|SLC25A5|SLC25A6|AP1S1|NUP88|PSMA6|PSMB4|PSMB8|PSMB10|PSMD4|PSME2|RAN|RANBP1|RANGAP1|RAE1|NUP50|PSIP1	-5.4
Reactome Gene Sets	6	R-HSA-162909	GC-L	Host Interactions of HIV factors	-3.2	4.9	4.7	30286	130	336	7	2.1	0.78	292|293|1174|5696|5699|5721|10053	SLC25A5|SLC25A6|AP1S1|PSMB8|PSMB10|PSME2|AP1M2	-2.6
Reactome Gene Sets	6	R-HSA-3371511	GASTRITIS	HSF1 activation	-5.3	17	8.9	30286	12	724	5	0.69	0.31	3320|3326|6117|7415|10728	HSP90AA1|HSP90AB1|RPA1|VCP|PTGES3	-4.3
Reactome Gene Sets	6	R-HSA-3371511	EGC-L	HSF1 activation	-4.2	10	6.6	30286	12	1217	5	0.41	0.18	3320|3326|6117|6119|10728	HSP90AA1|HSP90AB1|RPA1|RPA3|PTGES3	-3.4
Reactome Gene Sets	6	R-HSA-3371511	IM-LGD-L	HSF1 activation	-2.2	7.5	4.2	30286	12	1012	3	0.3	0.17	3320|6118|10728	HSP90AA1|RPA2|PTGES3	-1.8
Reactome Gene Sets	6	R-HSA-3371571	EGC-L	HSF1-dependent transactivation	-3.5	6.2	5.2	30286	24	1217	6	0.49	0.2	2288|2475|3312|3320|3326|10728	FKBP4|MTOR|HSPA8|HSP90AA1|HSP90AB1|PTGES3	-2.9
Reactome Gene Sets	6	R-HSA-3371571	IM-LGD-L	HSF1-dependent transactivation	-2.1	5	3.6	30286	24	1012	4	0.4	0.2	2475|3312|3320|10728	MTOR|HSPA8|HSP90AA1|PTGES3	-1.8
Reactome Gene Sets	6	R-HSA-3371497	EGC-L	HSP90 chaperone cycle for steroid hormone receptors (SHR) in the presence of ligand	-5.8	5.4	6.7	30286	55	1217	12	0.99	0.28	829|1783|2288|3312|3320|3326|10121|10382|10728|55860|81027|84617	CAPZA1|DYNC1LI2|FKBP4|HSPA8|HSP90AA1|HSP90AB1|ACTR1A|TUBB4A|PTGES3|ACTR10|TUBB1|TUBB6	-4.8
Reactome Gene Sets	6	R-HSA-2142845	EGC-L	Hyaluronan metabolism	-3.4	7.3	5.3	30286	17	1217	5	0.41	0.18	960|2990|3074|6548|11261	CD44|GUSB|HEXB|SLC9A1|CHP1	-2.8
Reactome Gene Sets	6	R-HSA-2142845	GC-NL	Hyaluronan metabolism	-2.6	6.6	4.5	30286	17	1076	4	0.37	0.19	960|2990|6548|11261	CD44|GUSB|SLC9A1|CHP1	-1.7
Reactome Gene Sets	6	R-HSA-2160916	EGC-L	Hyaluronan uptake and degradation	-4.2	10	6.6	30286	12	1217	5	0.41	0.18	960|2990|3074|6548|11261	CD44|GUSB|HEXB|SLC9A1|CHP1	-3.4
Reactome Gene Sets	6	R-HSA-2160916	GC-NL	Hyaluronan uptake and degradation	-3.2	9.4	5.6	30286	12	1076	4	0.37	0.19	960|2990|6548|11261	CD44|GUSB|SLC9A1|CHP1	-2.2
Reactome Gene Sets	6	R-HSA-2160916	IM-LGD-L	Hyaluronan uptake and degradation	-2.2	7.5	4.2	30286	12	1012	3	0.3	0.17	960|2990|3074	CD44|GUSB|HEXB	-1.8
Reactome Gene Sets	6	R-HSA-9709570	GASTRITIS	Impaired BRCA2 binding to RAD51	-2.9	6	4.6	30286	35	724	5	0.69	0.31	472|4683|5982|6117|10111	ATM|NBN|RFC2|RPA1|RAD50	-2.3
Reactome Gene Sets	6	R-HSA-9709570	IM-LGD-L	Impaired BRCA2 binding to RAD51	-2.2	4.3	3.6	30286	35	1012	5	0.49	0.22	472|4683|5982|6118|10111	ATM|NBN|RFC2|RPA2|RAD50	-1.9
Reactome Gene Sets	6	R-HSA-9709570	EGC-L	Impaired BRCA2 binding to RAD51	-2.6	4.3	4	30286	35	1217	6	0.49	0.2	4683|5982|5984|6117|6119|10111	NBN|RFC2|RFC4|RPA1|RPA3|RAD50	-2.1
Reactome Gene Sets	6	R-HSA-9635486	GASTRITIS	Infection with Mycobacterium tuberculosis	-3.4	7.7	5.5	30286	27	724	5	0.69	0.31	3837|4360|6421|11151|57674	KPNB1|MRC1|SFPQ|CORO1A|RNF213	-2.8
Reactome Gene Sets	6	R-HSA-9635486	EGC-L	Infection with Mycobacterium tuberculosis	-2.4	4.6	3.8	30286	27	1217	5	0.41	0.18	2023|3837|4057|6421|11151	ENO1|KPNB1|LTF|SFPQ|CORO1A	-2
Reactome Gene Sets	6	R-HSA-622312	IM-LGD-L	Inflammasomes	-3.3	7.1	5.2	30286	21	1012	5	0.49	0.22	834|3162|4790|10910|29108	CASP1|HMOX1|NFKB1|SUGT1|PYCARD	-2.7
Reactome Gene Sets	6	R-HSA-622312	GC-NL	Inflammasomes	-2.2	5.4	3.8	30286	21	1076	4	0.37	0.19	3162|3326|10910|29108	HMOX1|HSP90AB1|SUGT1|PYCARD	-1.5
Reactome Gene Sets	6	R-HSA-168255	EGC-L	Influenza Infection	-12	4.8	9.7	30286	157	1217	30	2.5	0.44	142|293|2962|2963|3320|3837|3838|4736|4927|5434|5611|5901|5903|6122|6134|6135|6136|6139|6146|6188|6193|6210|6231|7175|8086|8106|8480|10762|23521|53371	PARP1|SLC25A6|GTF2F1|GTF2F2|HSP90AA1|KPNB1|KPNA2|RPL10A|NUP88|POLR2E|DNAJC3|RAN|RANBP2|RPL3|RPL10|RPL11|RPL12|RPL17|RPL22|RPS3|RPS5|RPS15A|RPS26|TPR|AAAS|PABPN1|RAE1|NUP50|RPL13A|NUP54	-10
Reactome Gene Sets	6	R-HSA-168255	GASTRITIS	Influenza Infection	-2.8	2.9	3.8	30286	157	724	11	1.5	0.45	142|811|2963|3320|3837|5901|6209|7175|8106|8480|200916	PARP1|CALR|GTF2F2|HSP90AA1|KPNB1|RAN|RPS15|TPR|PABPN1|RAE1|RPL22L1	-2.3
Reactome Gene Sets	6	R-HSA-168255	IM-LGD-L	Influenza Infection	-3.6	2.9	4.3	30286	157	1012	15	1.5	0.38	293|811|2197|2962|2963|3320|3838|4927|5434|5901|6146|6231|8480|10762|200916	SLC25A6|CALR|FAU|GTF2F1|GTF2F2|HSP90AA1|KPNA2|NUP88|POLR2E|RAN|RPL22|RPS26|RAE1|NUP50|RPL22L1	-2.9
Reactome Gene Sets	6	R-HSA-168255	GC-L	Influenza Infection	-2.1	3.4	3.3	30286	157	336	6	1.8	0.72	293|2197|2962|2963|6193|6209	SLC25A6|FAU|GTF2F1|GTF2F2|RPS5|RPS15	-1.8
Reactome Gene Sets	6	R-HSA-168255	GC-NL	Influenza Infection	-8.7	4.3	8	30286	157	1076	24	2.2	0.45	142|293|1213|2197|2962|2963|4736|5434|5901|6146|6169|6170|6193|6209|6210|6233|6235|7175|8086|8106|8480|9349|23521|53371	PARP1|SLC25A6|CLTC|FAU|GTF2F1|GTF2F2|RPL10A|POLR2E|RAN|RPL22|RPL38|RPL39|RPS5|RPS15|RPS15A|RPS27A|RPS29|TPR|AAAS|PABPN1|RAE1|RPL23|RPL13A|NUP54	-6.9
Reactome Gene Sets	6	R-HSA-168273	EGC-L	Influenza Viral RNA Transcription and Replication	-9.7	4.6	8.5	30286	136	1217	25	2.1	0.41	142|2962|2963|3320|4736|4927|5434|5611|5903|6122|6134|6135|6136|6139|6146|6188|6193|6210|6231|7175|8086|8480|10762|23521|53371	PARP1|GTF2F1|GTF2F2|HSP90AA1|RPL10A|NUP88|POLR2E|DNAJC3|RANBP2|RPL3|RPL10|RPL11|RPL12|RPL17|RPL22|RPS3|RPS5|RPS15A|RPS26|TPR|AAAS|RAE1|NUP50|RPL13A|NUP54	-8.3
Reactome Gene Sets	6	R-HSA-168273	IM-LGD-L	Influenza Viral RNA Transcription and Replication	-2.2	2.4	3.1	30286	136	1012	11	1.1	0.33	2197|2962|2963|3320|4927|5434|6146|6231|8480|10762|200916	FAU|GTF2F1|GTF2F2|HSP90AA1|NUP88|POLR2E|RPL22|RPS26|RAE1|NUP50|RPL22L1	-1.8
Reactome Gene Sets	6	R-HSA-168273	GC-NL	Influenza Viral RNA Transcription and Replication	-7.1	4.1	7	30286	136	1076	20	1.9	0.41	142|2197|2962|2963|4736|5434|6146|6169|6170|6193|6209|6210|6233|6235|7175|8086|8480|9349|23521|53371	PARP1|FAU|GTF2F1|GTF2F2|RPL10A|POLR2E|RPL22|RPL38|RPL39|RPS5|RPS15|RPS15A|RPS27A|RPS29|TPR|AAAS|RAE1|RPL23|RPL13A|NUP54	-5.4
Reactome Gene Sets	6	R-HSA-166663	IM-LGD-L	Initial triggering of complement	-6.3	10	8.4	30286	23	1012	8	0.79	0.28	629|713|714|715|716|718|721|5199	CFB|C1QB|C1QC|C1R|C1S|C3|C4B|CFP	-5.3
Reactome Gene Sets	6	R-HSA-166663	EGC-L	Initial triggering of complement	-4.6	7.6	6.5	30286	23	1217	7	0.58	0.22	629|713|714|715|716|718|5199	CFB|C1QB|C1QC|C1R|C1S|C3|CFP	-3.8
Reactome Gene Sets	6	R-HSA-166663	IM-LGD-NL	Initial triggering of complement	-4	16	7.5	30286	23	333	4	1.2	0.6	713|714|715|716	C1QB|C1QC|C1R|C1S	-2.8
Reactome Gene Sets	6	R-HSA-166663	GC-NL	Initial triggering of complement	-5	8.6	7	30286	23	1076	7	0.65	0.25	629|713|714|715|716|718|5199	CFB|C1QB|C1QC|C1R|C1S|C3|CFP	-3.6
Reactome Gene Sets	6	R-HSA-2995383	GASTRITIS	Initiation of Nuclear Envelope (NE) Reformation	-4.2	11	6.8	30286	19	724	5	0.69	0.31	983|3837|4001|23592|221496	CDK1|KPNB1|LMNB1|LEMD3|LEMD2	-3.4
Reactome Gene Sets	6	R-HSA-2995383	EGC-L	Initiation of Nuclear Envelope (NE) Reformation	-4.1	7.9	6.1	30286	19	1217	6	0.49	0.2	983|3837|4001|7112|23592|221496	CDK1|KPNB1|LMNB1|TMPO|LEMD3|LEMD2	-3.4
Reactome Gene Sets	6	R-HSA-2995383	IM-LGD-L	Initiation of Nuclear Envelope (NE) Reformation	-2.5	6.3	4.3	30286	19	1012	4	0.4	0.2	2010|4001|23592|221496	EMD|LMNB1|LEMD3|LEMD2	-2.1
Reactome Gene Sets	6	R-HSA-8875360	GASTRITIS	InlB-mediated entry of Listeria monocytogenes into host cell	-3.4	11	6.2	30286	15	724	4	0.55	0.28	867|6456|8027|30011	CBL|SH3GL2|STAM|SH3KBP1	-2.8
Reactome Gene Sets	6	R-HSA-8875360	GC-NL	InlB-mediated entry of Listeria monocytogenes into host cell	-3.9	9.4	6.2	30286	15	1076	5	0.46	0.21	867|6233|6455|8027|30011	CBL|RPS27A|SH3GL1|STAM|SH3KBP1	-2.8
Reactome Gene Sets	6	R-HSA-8875360	EGC-L	InlB-mediated entry of Listeria monocytogenes into host cell	-3.7	8.3	5.8	30286	15	1217	5	0.41	0.18	867|2060|6455|8027|30011	CBL|EPS15|SH3GL1|STAM|SH3KBP1	-3
Reactome Gene Sets	6	R-HSA-8875360	GC-L	InlB-mediated entry of Listeria monocytogenes into host cell	-3.3	18	7	30286	15	336	3	0.89	0.51	6455|6456|30011	SH3GL1|SH3GL2|SH3KBP1	-2.7
Reactome Gene Sets	6	R-HSA-9609523	IM-LGD-L	Insertion of tail-anchored proteins into the endoplasmic reticulum membrane	-3.2	6.8	5.1	30286	22	1012	5	0.49	0.22	2010|3162|6844|10952|23480	EMD|HMOX1|VAMP2|SEC61B|SEC61G	-2.6
Reactome Gene Sets	6	R-HSA-9609523	EGC-L	Insertion of tail-anchored proteins into the endoplasmic reticulum membrane	-2.8	5.7	4.5	30286	22	1217	5	0.41	0.18	224|6449|6844|10952|23480	ALDH3A2|SGTA|VAMP2|SEC61B|SEC61G	-2.3
Reactome Gene Sets	6	R-HSA-163685	EGC-L	Integration of energy metabolism	-4	3.2	4.7	30286	108	1217	14	1.2	0.31	31|2181|2182|2767|2776|2778|2788|5331|5577|6844|6888|8826|54331|55970	ACACA|ACSL3|ACSL4|GNA11|GNAQ|GNAS|GNG7|PLCB3|PRKAR2B|VAMP2|TALDO1|IQGAP1|GNG2|GNG12	-3.2
Reactome Gene Sets	6	R-HSA-216083	GC-NL	Integrin cell surface interactions	-7.3	5.3	7.6	30286	85	1076	16	1.5	0.37	960|1291|1292|2200|2243|2244|3383|3385|3673|3678|3684|3685|3689|7057|7448|7450	CD44|COL6A1|COL6A2|FBN1|FGA|FGB|ICAM1|ICAM3|ITGA2|ITGA5|ITGAM|ITGAV|ITGB2|THBS1|VTN|VWF	-5.6
Reactome Gene Sets	6	R-HSA-216083	IM-LGD-L	Integrin cell surface interactions	-5.3	4.6	6.1	30286	85	1012	13	1.3	0.35	960|2243|2244|3385|3655|3672|3673|3674|3684|3689|7057|7448|7450	CD44|FGA|FGB|ICAM3|ITGA6|ITGA1|ITGA2|ITGA2B|ITGAM|ITGB2|THBS1|VTN|VWF	-4.4
Reactome Gene Sets	6	R-HSA-216083	EGC-L	Integrin cell surface interactions	-5.2	4.1	5.9	30286	85	1217	14	1.2	0.31	960|1277|1291|1292|2243|2244|3383|3385|3655|3674|3684|3689|7057|7448	CD44|COL1A1|COL6A1|COL6A2|FGA|FGB|ICAM1|ICAM3|ITGA6|ITGA2B|ITGAM|ITGB2|THBS1|VTN	-4.2
Reactome Gene Sets	6	R-HSA-216083	GC-L	Integrin cell surface interactions	-3.4	6.4	5.2	30286	85	336	6	1.8	0.72	960|3371|3385|3678|3689|7450	CD44|TNC|ICAM3|ITGA5|ITGB2|VWF	-2.8
Reactome Gene Sets	6	R-HSA-216083	GASTRITIS	Integrin cell surface interactions	-2.4	3.4	3.5	30286	85	724	7	0.97	0.36	960|1291|1292|3383|3385|3689|7450	CD44|COL6A1|COL6A2|ICAM1|ICAM3|ITGB2|VWF	-2
Reactome Gene Sets	6	R-HSA-216083	IM-LGD-NL	Integrin cell surface interactions	-5.3	8.6	7.4	30286	85	333	8	2.4	0.84	1291|1292|3371|3684|3689|7057|7448|7450	COL6A1|COL6A2|TNC|ITGAM|ITGB2|THBS1|VTN|VWF	-3.9
Reactome Gene Sets	6	R-HSA-216083	EGC-NL	Integrin cell surface interactions	-3.4	12	6.3	30286	85	120	4	3.3	1.6	1292|3371|3385|3689	COL6A2|TNC|ICAM3|ITGB2	-2.4
Reactome Gene Sets	6	R-HSA-354192	GC-NL	Integrin signaling	-3.5	6.3	5.2	30286	27	1076	6	0.56	0.23	1445|2243|2244|5770|7094|7450	CSK|FGA|FGB|PTPN1|TLN1|VWF	-2.4
Reactome Gene Sets	6	R-HSA-354192	GASTRITIS	Integrin signaling	-2.4	6.2	4.2	30286	27	724	4	0.55	0.28	1445|5770|7094|7450	CSK|PTPN1|TLN1|VWF	-2
Reactome Gene Sets	6	R-HSA-354192	EGC-L	Integrin signaling	-3.2	5.5	4.8	30286	27	1217	6	0.49	0.2	1445|2243|2244|3674|5770|7094	CSK|FGA|FGB|ITGA2B|PTPN1|TLN1	-2.6
Reactome Gene Sets	6	R-HSA-354192	IM-LGD-L	Integrin signaling	-2.7	5.5	4.4	30286	27	1012	5	0.49	0.22	1445|2243|2244|3674|7450	CSK|FGA|FGB|ITGA2B|VWF	-2.3
Reactome Gene Sets	6	R-HSA-354192	IM-LGD-NL	Integrin signaling	-2.5	10	5	30286	27	333	3	0.9	0.52	1445|7094|7450	CSK|TLN1|VWF	-1.7
Reactome Gene Sets	6	R-HSA-177243	IM-LGD-L	Interactions of Rev with host cellular proteins	-2.9	5	4.5	30286	36	1012	6	0.59	0.24	4927|5901|5902|5905|8480|10762	NUP88|RAN|RANBP1|RANGAP1|RAE1|NUP50	-2.4
Reactome Gene Sets	6	R-HSA-177243	GC-NL	Interactions of Rev with host cellular proteins	-2.8	4.7	4.3	30286	36	1076	6	0.56	0.23	1104|5901|7175|8086|8480|53371	RCC1|RAN|TPR|AAAS|RAE1|NUP54	-1.9
Reactome Gene Sets	6	R-HSA-177243	EGC-L	Interactions of Rev with host cellular proteins	-8.1	8.3	9	30286	36	1217	12	0.99	0.28	1104|3837|4927|5901|5902|5903|5905|7175|8086|8480|10762|53371	RCC1|KPNB1|NUP88|RAN|RANBP1|RANBP2|RANGAP1|TPR|AAAS|RAE1|NUP50|NUP54	-6.8
Reactome Gene Sets	6	R-HSA-176033	EGC-L	Interactions of Vpr with host cellular proteins	-6	6.9	7.3	30286	36	1217	10	0.82	0.26	291|292|293|4927|5903|7175|8086|8480|10762|53371	SLC25A4|SLC25A5|SLC25A6|NUP88|RANBP2|TPR|AAAS|RAE1|NUP50|NUP54	-4.9
Reactome Gene Sets	6	R-HSA-176033	GC-NL	Interactions of Vpr with host cellular proteins	-4.5	6.3	6.1	30286	36	1076	8	0.74	0.26	291|292|293|7175|8086|8480|11168|53371	SLC25A4|SLC25A5|SLC25A6|TPR|AAAS|RAE1|PSIP1|NUP54	-3.2
Reactome Gene Sets	6	R-HSA-176033	IM-LGD-L	Interactions of Vpr with host cellular proteins	-3.8	5.8	5.4	30286	36	1012	7	0.69	0.26	291|292|293|4927|8480|10762|11168	SLC25A4|SLC25A5|SLC25A6|NUP88|RAE1|NUP50|PSIP1	-3.1
Reactome Gene Sets	6	R-HSA-909733	GASTRITIS	Interferon alpha/beta signaling	-6.5	6.5	7.6	30286	77	724	12	1.7	0.47	103|2634|3106|3662|3669|3837|4599|4938|5696|5770|5777|10379	ADAR|GBP2|HLA-B|IRF4|ISG20|KPNB1|MX1|OAS1|PSMB8|PTPN1|PTPN6|IRF9	-5.4
Reactome Gene Sets	6	R-HSA-909733	GC-L	Interferon alpha/beta signaling	-4.6	8.2	6.7	30286	77	336	7	2.1	0.78	2634|3106|3430|5696|5770|5777|10379	GBP2|HLA-B|IFI35|PSMB8|PTPN1|PTPN6|IRF9	-3.8
Reactome Gene Sets	6	R-HSA-909733	EGC-L	Interferon alpha/beta signaling	-4.3	3.9	5.2	30286	77	1217	12	0.99	0.28	103|3106|3430|3437|3837|4599|4938|4940|5696|5770|5777|10379	ADAR|HLA-B|IFI35|IFIT3|KPNB1|MX1|OAS1|OAS3|PSMB8|PTPN1|PTPN6|IRF9	-3.5
Reactome Gene Sets	6	R-HSA-909733	GC-NL	Interferon alpha/beta signaling	-2.2	2.9	3.2	30286	77	1076	8	0.74	0.26	2634|3106|3430|3662|3716|5770|5777|6233	GBP2|HLA-B|IFI35|IRF4|JAK1|PTPN1|PTPN6|RPS27A	-1.5
Reactome Gene Sets	6	R-HSA-877300	GC-L	Interferon gamma signaling	-8	10	9.7	30286	96	336	11	3.3	0.97	960|2633|2634|3106|3115|3122|5770|5777|10379|23321|23650	CD44|GBP1|GBP2|HLA-B|HLA-DPB1|HLA-DRA|PTPN1|PTPN6|IRF9|TRIM2|TRIM29	-6.8
Reactome Gene Sets	6	R-HSA-877300	GASTRITIS	Interferon gamma signaling	-7.2	6.1	7.8	30286	96	724	14	1.9	0.51	960|2633|2634|3106|3115|3122|3123|3383|3662|4938|5770|5777|10379|23321	CD44|GBP1|GBP2|HLA-B|HLA-DPB1|HLA-DRA|HLA-DRB1|ICAM1|IRF4|OAS1|PTPN1|PTPN6|IRF9|TRIM2	-6
Reactome Gene Sets	6	R-HSA-877300	GC-NL	Interferon gamma signaling	-5.8	4.4	6.4	30286	96	1076	15	1.4	0.36	960|2633|2634|3106|3115|3122|3127|3383|3662|3716|4904|5580|5770|5777|23321	CD44|GBP1|GBP2|HLA-B|HLA-DPB1|HLA-DRA|HLA-DRB5|ICAM1|IRF4|JAK1|YBX1|PRKCD|PTPN1|PTPN6|TRIM2	-4.3
Reactome Gene Sets	6	R-HSA-877300	EGC-L	Interferon gamma signaling	-3.9	3.4	4.8	30286	96	1217	13	1.1	0.29	960|2633|3106|3122|3123|3383|4938|4940|5580|5770|5777|10379|23650	CD44|GBP1|HLA-B|HLA-DRA|HLA-DRB1|ICAM1|OAS1|OAS3|PRKCD|PTPN1|PTPN6|IRF9|TRIM29	-3.2
Reactome Gene Sets	6	R-HSA-877300	IM-LGD-NL	Interferon gamma signaling	-3.2	5.7	4.8	30286	96	333	6	1.8	0.73	3115|3122|3133|3662|5777|23650	HLA-DPB1|HLA-DRA|HLA-E|IRF4|PTPN6|TRIM29	-2.2
Reactome Gene Sets	6	R-HSA-877300	EGC-NL	Interferon gamma signaling	-2.2	7.9	4.3	30286	96	120	3	2.5	1.4	3115|3122|3716	HLA-DPB1|HLA-DRA|JAK1	-1.4
Reactome Gene Sets	6	R-HSA-913531	EGC-L	Interferon Signaling	-12	3.7	9.1	30286	269	1217	40	3.3	0.51	103|960|983|1660|1968|1973|2633|3106|3122|3123|3312|3383|3430|3437|3608|3837|3838|4599|4927|4938|4940|5580|5611|5696|5770|5777|5903|7175|7329|8086|8480|8894|9775|10379|10382|10762|23650|53371|81027|84617	ADAR|CD44|CDK1|DHX9|EIF2S3|EIF4A1|GBP1|HLA-B|HLA-DRA|HLA-DRB1|HSPA8|ICAM1|IFI35|IFIT3|ILF2|KPNB1|KPNA2|MX1|NUP88|OAS1|OAS3|PRKCD|DNAJC3|PSMB8|PTPN1|PTPN6|RANBP2|TPR|UBE2I|AAAS|RAE1|EIF2S2|EIF4A3|IRF9|TUBB4A|NUP50|TRIM29|NUP54|TUBB1|TUBB6	-10
Reactome Gene Sets	6	R-HSA-913531	GASTRITIS	Interferon Signaling	-9.4	4.2	8.2	30286	269	724	27	3.7	0.7	103|960|983|1973|2633|2634|3106|3115|3122|3123|3383|3662|3669|3837|4599|4938|5696|5770|5777|7175|7318|7329|8480|8517|10379|23321|84617	ADAR|CD44|CDK1|EIF4A1|GBP1|GBP2|HLA-B|HLA-DPB1|HLA-DRA|HLA-DRB1|ICAM1|IRF4|ISG20|KPNB1|MX1|OAS1|PSMB8|PTPN1|PTPN6|TPR|UBA7|UBE2I|RAE1|IKBKG|IRF9|TRIM2|TUBB6	-8
Reactome Gene Sets	6	R-HSA-913531	GC-L	Interferon Signaling	-5.7	4.7	6.4	30286	269	336	14	4.2	1.1	960|2633|2634|3106|3115|3122|3430|5696|5770|5777|8517|10379|23321|23650	CD44|GBP1|GBP2|HLA-B|HLA-DPB1|HLA-DRA|IFI35|PSMB8|PTPN1|PTPN6|IKBKG|IRF9|TRIM2|TRIM29	-4.7
Reactome Gene Sets	6	R-HSA-913531	GC-NL	Interferon Signaling	-5.9	2.8	5.8	30286	269	1076	27	2.5	0.48	960|983|1660|2316|2633|2634|3106|3115|3122|3127|3383|3430|3662|3716|4904|5580|5770|5777|6233|7175|7329|8086|8480|8517|23321|53371|84617	CD44|CDK1|DHX9|FLNA|GBP1|GBP2|HLA-B|HLA-DPB1|HLA-DRA|HLA-DRB5|ICAM1|IFI35|IRF4|JAK1|YBX1|PRKCD|PTPN1|PTPN6|RPS27A|TPR|UBE2I|AAAS|RAE1|IKBKG|TRIM2|NUP54|TUBB6	-4.3
Reactome Gene Sets	6	R-HSA-913531	IM-LGD-L	Interferon Signaling	-3.1	2.2	3.8	30286	269	1012	20	2	0.44	960|1973|2317|3106|3115|3122|3312|3430|3609|3662|3838|4927|4939|5696|5777|7329|8480|9775|10762|23321	CD44|EIF4A1|FLNB|HLA-B|HLA-DPB1|HLA-DRA|HSPA8|IFI35|ILF3|IRF4|KPNA2|NUP88|OAS2|PSMB8|PTPN6|UBE2I|RAE1|EIF4A3|NUP50|TRIM2	-2.5
Reactome Gene Sets	6	R-HSA-446652	GC-L	Interleukin-1 family signaling	-3.5	4.7	4.9	30286	153	336	8	2.4	0.83	5696|5699|5721|5777|8517|8878|79671|121457	PSMB8|PSMB10|PSME2|PTPN6|IKBKG|SQSTM1|NLRX1|IKBIP	-2.9
Reactome Gene Sets	6	R-HSA-446652	GASTRITIS	Interleukin-1 family signaling	-2.4	2.7	3.4	30286	153	724	10	1.4	0.43	3146|5694|5695|5696|5699|5721|5777|6283|8517|79792	HMGB1|PSMB6|PSMB7|PSMB8|PSMB10|PSME2|PTPN6|S100A12|IKBKG|GSDMD	-2
Reactome Gene Sets	6	R-HSA-446652	IM-LGD-L	Interleukin-1 family signaling	-2.3	2.3	3.1	30286	153	1012	12	1.2	0.34	834|3606|4790|5687|5692|5696|5699|5710|5721|5777|8878|79671	CASP1|IL18|NFKB1|PSMA6|PSMB4|PSMB8|PSMB10|PSMD4|PSME2|PTPN6|SQSTM1|NLRX1	-1.9
Reactome Gene Sets	6	R-HSA-448706	IM-LGD-L	Interleukin-1 processing	-2.6	10	5	30286	9	1012	3	0.3	0.17	834|3606|4790	CASP1|IL18|NFKB1	-2.1
Reactome Gene Sets	6	R-HSA-9020702	GC-L	Interleukin-1 signaling	-3.5	5.5	5.1	30286	115	336	7	2.1	0.78	5696|5699|5721|8517|8878|79671|121457	PSMB8|PSMB10|PSME2|IKBKG|SQSTM1|NLRX1|IKBIP	-2.9
Reactome Gene Sets	6	R-HSA-9020702	GASTRITIS	Interleukin-1 signaling	-2.2	2.9	3.2	30286	115	724	8	1.1	0.39	3146|5694|5695|5696|5699|5721|6283|8517	HMGB1|PSMB6|PSMB7|PSMB8|PSMB10|PSME2|S100A12|IKBKG	-1.8
Reactome Gene Sets	6	R-HSA-447115	EGC-L	Interleukin-12 family signaling	-6.5	5.7	7.2	30286	57	1217	13	1.1	0.29	829|3185|3936|4001|4282|4478|5062|5721|6627|6888|9049|27250|552900	CAPZA1|HNRNPF|LCP1|LMNB1|MIF|MSN|PAK2|PSME2|SNRPA1|TALDO1|AIP|PDCD4|BOLA2	-5.4
Reactome Gene Sets	6	R-HSA-447115	GASTRITIS	Interleukin-12 family signaling	-3.4	5.1	4.9	30286	57	724	7	0.97	0.36	829|3181|3936|4001|4478|5721|9049	CAPZA1|HNRNPA2B1|LCP1|LMNB1|MSN|PSME2|AIP	-2.8
Reactome Gene Sets	6	R-HSA-447115	GC-NL	Interleukin-12 family signaling	-4.5	4.9	5.7	30286	57	1076	10	0.93	0.29	1265|3181|3716|3936|4001|4478|5062|6627|9049|27250	CNN2|HNRNPA2B1|JAK1|LCP1|LMNB1|MSN|PAK2|SNRPA1|AIP|PDCD4	-3.3
Reactome Gene Sets	6	R-HSA-447115	IM-LGD-L	Interleukin-12 family signaling	-4	4.7	5.2	30286	57	1012	9	0.89	0.3	1072|3185|3313|3936|4001|5306|5721|9049|552900	CFL1|HNRNPF|HSPA9|LCP1|LMNB1|PITPNA|PSME2|AIP|BOLA2	-3.2
Reactome Gene Sets	6	R-HSA-9020591	EGC-L	Interleukin-12 signaling	-7.6	6.9	8.3	30286	47	1217	13	1.1	0.29	829|3185|3936|4001|4282|4478|5062|5721|6627|6888|9049|27250|552900	CAPZA1|HNRNPF|LCP1|LMNB1|MIF|MSN|PAK2|PSME2|SNRPA1|TALDO1|AIP|PDCD4|BOLA2	-6.4
Reactome Gene Sets	6	R-HSA-9020591	GC-NL	Interleukin-12 signaling	-5.3	6	6.6	30286	47	1076	10	0.93	0.29	1265|3181|3716|3936|4001|4478|5062|6627|9049|27250	CNN2|HNRNPA2B1|JAK1|LCP1|LMNB1|MSN|PAK2|SNRPA1|AIP|PDCD4	-3.9
Reactome Gene Sets	6	R-HSA-9020591	GASTRITIS	Interleukin-12 signaling	-3.9	6.2	5.6	30286	47	724	7	0.97	0.36	829|3181|3936|4001|4478|5721|9049	CAPZA1|HNRNPA2B1|LCP1|LMNB1|MSN|PSME2|AIP	-3.2
Reactome Gene Sets	6	R-HSA-9020591	IM-LGD-L	Interleukin-12 signaling	-4.7	5.7	6	30286	47	1012	9	0.89	0.3	1072|3185|3313|3936|4001|5306|5721|9049|552900	CFL1|HNRNPF|HSPA9|LCP1|LMNB1|PITPNA|PSME2|AIP|BOLA2	-3.8
Reactome Gene Sets	6	R-HSA-512988	GC-NL	Interleukin-3, Interleukin-5 and GM-CSF signaling	-2.2	3.5	3.4	30286	48	1076	6	0.56	0.23	867|3716|4067|5777|6233|7525	CBL|JAK1|LYN|PTPN6|RPS27A|YES1	-1.4
Reactome Gene Sets	6	R-HSA-6785807	GASTRITIS	Interleukin-4 and Interleukin-13 signaling	-3.6	3.9	4.7	30286	108	724	10	1.4	0.43	301|2162|3162|3320|3383|3662|3689|4128|7184|7431	ANXA1|F13A1|HMOX1|HSP90AA1|ICAM1|IRF4|ITGB2|MAOA|HSP90B1|VIM	-2.9
Reactome Gene Sets	6	R-HSA-6785807	GC-NL	Interleukin-4 and Interleukin-13 signaling	-3.9	3.4	4.8	30286	108	1076	13	1.2	0.33	301|3162|3383|3606|3662|3684|3689|3716|4128|4313|4318|6778|7431	ANXA1|HMOX1|ICAM1|IL18|IRF4|ITGAM|ITGB2|JAK1|MAOA|MMP2|MMP9|STAT6|VIM	-2.8
Reactome Gene Sets	6	R-HSA-6785807	IM-LGD-NL	Interleukin-4 and Interleukin-13 signaling	-2.9	5.1	4.4	30286	108	333	6	1.8	0.73	301|3662|3684|3689|3911|4128	ANXA1|IRF4|ITGAM|ITGB2|LAMA5|MAOA	-2
Reactome Gene Sets	6	R-HSA-6785807	EGC-L	Interleukin-4 and Interleukin-13 signaling	-2.4	2.5	3.3	30286	108	1217	11	0.9	0.27	301|2162|3312|3320|3383|3606|3684|3689|4128|4318|7431	ANXA1|F13A1|HSPA8|HSP90AA1|ICAM1|IL18|ITGAM|ITGB2|MAOA|MMP9|VIM	-2
Reactome Gene Sets	6	R-HSA-6785807	IM-LGD-L	Interleukin-4 and Interleukin-13 signaling	-3	3	4	30286	108	1012	11	1.1	0.33	301|3162|3312|3320|3606|3662|3684|3689|4128|7076|7184	ANXA1|HMOX1|HSPA8|HSP90AA1|IL18|IRF4|ITGAM|ITGB2|MAOA|TIMP1|HSP90B1	-2.5
Reactome Gene Sets	6	R-HSA-6811442	GC-L	Intra-Golgi and retrograde Golgi-to-ER traffic	-2.1	3.1	3.2	30286	202	336	7	2.1	0.78	2590|7110|10466|26958|51594|55605|55850	GALNT2|TMF1|COG5|COPG2|NBAS|KIF21A|USE1	-1.8
Reactome Gene Sets	6	R-HSA-6811442	EGC-L	Intra-Golgi and retrograde Golgi-to-ER traffic	-4.6	2.7	5	30286	202	1217	22	1.8	0.38	378|381|829|1783|2590|5048|5050|7110|9554|10121|10382|10972|23423|26958|51594|53407|54732|55850|55860|81027|84617|91949	ARF4|ARF5|CAPZA1|DYNC1LI2|GALNT2|PAFAH1B1|PAFAH1B3|TMF1|SEC22B|ACTR1A|TUBB4A|TMED10|TMED3|COPG2|NBAS|STX18|TMED9|USE1|ACTR10|TUBB1|TUBB6|COG7	-3.8
Reactome Gene Sets	6	R-HSA-6811442	GC-NL	Intra-Golgi and retrograde Golgi-to-ER traffic	-2.2	2.1	3	30286	202	1076	15	1.4	0.36	381|1783|2590|5048|10121|10466|23303|27333|51594|54732|55860|83548|84342|84617|91949	ARF5|DYNC1LI2|GALNT2|PAFAH1B1|ACTR1A|COG5|KIF13B|GOLIM4|NBAS|TMED9|ACTR10|COG3|COG8|TUBB6|COG7	-1.5
Reactome Gene Sets	6	R-HSA-140837	IM-LGD-L	Intrinsic Pathway of Fibrin Clot Formation	-6.3	10	8.4	30286	23	1012	8	0.79	0.28	2|710|2147|2161|3053|3818|5627|7450	A2M|SERPING1|F2|F12|SERPIND1|KLKB1|PROS1|VWF	-5.3
Reactome Gene Sets	6	R-HSA-140837	GC-NL	Intrinsic Pathway of Fibrin Clot Formation	-3	6.1	4.7	30286	23	1076	5	0.46	0.21	2|710|2147|5627|7450	A2M|SERPING1|F2|PROS1|VWF	-2
Reactome Gene Sets	6	R-HSA-5603041	EGC-L	IRAK4 deficiency (TLR2/4)	-4.3	8.3	6.3	30286	18	1217	6	0.49	0.2	929|2243|2244|3146|6279|6280	CD14|FGA|FGB|HMGB1|S100A8|S100A9	-3.5
Reactome Gene Sets	6	R-HSA-5603041	GC-NL	IRAK4 deficiency (TLR2/4)	-3.5	7.8	5.6	30286	18	1076	5	0.46	0.21	929|2243|2244|6279|6280	CD14|FGA|FGB|S100A8|S100A9	-2.4
Reactome Gene Sets	6	R-HSA-5603041	GASTRITIS	IRAK4 deficiency (TLR2/4)	-2.1	7	4	30286	18	724	3	0.41	0.24	929|3146|6279	CD14|HMGB1|S100A8	-1.7
Reactome Gene Sets	6	R-HSA-381070	GASTRITIS	IRE1alpha activates chaperones	-3.6	5.6	5.2	30286	52	724	7	0.97	0.36	1200|3309|7094|10130|51726|56005|100137049	TPP1|HSPA5|TLN1|PDIA6|DNAJB11|MYDGF|PLA2G4B	-3
Reactome Gene Sets	6	R-HSA-381070	EGC-L	IRE1alpha activates chaperones	-3	3.8	4.2	30286	52	1217	8	0.66	0.23	1200|3068|5611|7094|10113|10525|10954|100137049	TPP1|HDGF|DNAJC3|TLN1|PREB|HYOU1|PDIA5|PLA2G4B	-2.4
Reactome Gene Sets	6	R-HSA-917937	GC-NL	Iron uptake and transport	-4.5	4.9	5.6	30286	58	1076	10	0.93	0.29	48|1356|2512|3162|3163|6233|7037|10539|28982|55240	ACO1|CP|FTL|HMOX1|HMOX2|RPS27A|TFRC|GLRX3|FLVCR1|STEAP3	-3.2
Reactome Gene Sets	6	R-HSA-917937	IM-LGD-L	Iron uptake and transport	-3.2	4.1	4.4	30286	58	1012	8	0.79	0.28	48|1356|3162|7018|7037|10539|28982|51382	ACO1|CP|HMOX1|TF|TFRC|GLRX3|FLVCR1|ATP6V1D	-2.6
Reactome Gene Sets	6	R-HSA-917937	EGC-L	Iron uptake and transport	-2.7	3.4	3.8	30286	58	1217	8	0.66	0.23	48|1356|3163|7018|7037|10539|28982|55240	ACO1|CP|HMOX2|TF|TFRC|GLRX3|FLVCR1|STEAP3	-2.2
Reactome Gene Sets	6	R-HSA-917937	GASTRITIS	Iron uptake and transport	-2.6	4.3	4	30286	58	724	6	0.83	0.34	48|3162|3163|7037|28982|55240	ACO1|HMOX1|HMOX2|TFRC|FLVCR1|STEAP3	-2.1
Reactome Gene Sets	6	R-HSA-917937	IM-LGD-NL	Iron uptake and transport	-3.4	7.8	5.5	30286	58	333	5	1.5	0.67	48|7037|10539|28982|55240	ACO1|TFRC|GLRX3|FLVCR1|STEAP3	-2.3
Reactome Gene Sets	6	R-HSA-1169408	EGC-L	ISG15 antiviral mechanism	-4.5	4.1	5.4	30286	73	1217	12	0.99	0.28	1973|3837|3838|4599|4927|5903|7175|8086|8480|9775|10762|53371	EIF4A1|KPNB1|KPNA2|MX1|NUP88|RANBP2|TPR|AAAS|RAE1|EIF4A3|NUP50|NUP54	-3.7
Reactome Gene Sets	6	R-HSA-1169408	GASTRITIS	ISG15 antiviral mechanism	-2.1	3.4	3.3	30286	73	724	6	0.83	0.34	1973|3837|4599|7175|7318|8480	EIF4A1|KPNB1|MX1|TPR|UBA7|RAE1	-1.8
Reactome Gene Sets	6	R-HSA-74182	GASTRITIS	Ketone body metabolism	-4.2	17	7.8	30286	10	724	4	0.55	0.28	38|622|3155|5019	ACAT1|BDH1|HMGCL|OXCT1	-3.4
Reactome Gene Sets	6	R-HSA-74182	IM-LGD-L	Ketone body metabolism	-3.7	12	6.5	30286	10	1012	4	0.4	0.2	38|622|3155|5019	ACAT1|BDH1|HMGCL|OXCT1	-3
Reactome Gene Sets	6	R-HSA-74182	GC-NL	Ketone body metabolism	-3.6	11	6.2	30286	10	1076	4	0.37	0.19	38|622|3155|5019	ACAT1|BDH1|HMGCL|OXCT1	-2.5
Reactome Gene Sets	6	R-HSA-74182	EGC-L	Ketone body metabolism	-2.2	7.5	4.2	30286	10	1217	3	0.25	0.14	38|3155|5019	ACAT1|HMGCL|OXCT1	-1.8
Reactome Gene Sets	6	R-HSA-450604	EGC-L	KSRP (KHSRP) binds and destabilizes mRNA	-6.9	12	9	30286	17	1217	8	0.66	0.23	7534|8570|11340|51010|51013|54512|56915|118460	YWHAZ|KHSRP|EXOSC8|EXOSC3|EXOSC1|EXOSC4|EXOSC5|EXOSC6	-5.8
Reactome Gene Sets	6	R-HSA-156827	EGC-L	L13a-mediated translational silencing of Ceruloplasmin expression	-4.4	3.3	5.1	30286	112	1217	15	1.2	0.32	1968|1973|4736|6122|6134|6135|6136|6139|6146|6188|6193|6210|6231|8894|23521	EIF2S3|EIF4A1|RPL10A|RPL3|RPL10|RPL11|RPL12|RPL17|RPL22|RPS3|RPS5|RPS15A|RPS26|EIF2S2|RPL13A	-3.6
Reactome Gene Sets	6	R-HSA-156827	GC-NL	L13a-mediated translational silencing of Ceruloplasmin expression	-3.8	3.3	4.6	30286	112	1076	13	1.2	0.33	1964|2197|4736|6146|6169|6170|6193|6209|6210|6233|6235|9349|23521	EIF1AX|FAU|RPL10A|RPL22|RPL38|RPL39|RPS5|RPS15|RPS15A|RPS27A|RPS29|RPL23|RPL13A	-2.6
Reactome Gene Sets	6	R-HSA-69186	EGC-L	Lagging Strand Synthesis	-6.3	10	8.2	30286	20	1217	8	0.66	0.23	2237|5111|5424|5425|5982|5984|6117|6119	FEN1|PCNA|POLD1|POLD2|RFC2|RFC4|RPA1|RPA3	-5.2
Reactome Gene Sets	6	R-HSA-69186	GASTRITIS	Lagging Strand Synthesis	-4.1	10	6.6	30286	20	724	5	0.69	0.31	2237|5111|5424|5982|6117	FEN1|PCNA|POLD1|RFC2|RPA1	-3.3
Reactome Gene Sets	6	R-HSA-69186	GC-NL	Lagging Strand Synthesis	-4.3	8.4	6.4	30286	20	1076	6	0.56	0.23	2237|5111|5424|5981|5982|5984	FEN1|PCNA|POLD1|RFC1|RFC2|RFC4	-3
Reactome Gene Sets	6	R-HSA-69186	IM-LGD-L	Lagging Strand Synthesis	-3.4	7.5	5.4	30286	20	1012	5	0.49	0.22	5111|5424|5425|5982|6118	PCNA|POLD1|POLD2|RFC2|RPA2	-2.8
Reactome Gene Sets	6	R-HSA-3000157	IM-LGD-L	Laminin interactions	-2.5	5	4.1	30286	30	1012	5	0.49	0.22	3655|3672|3673|3908|3914	ITGA6|ITGA1|ITGA2|LAMA2|LAMB3	-2.1
Reactome Gene Sets	6	R-HSA-162599	EGC-L	Late Phase of HIV Life Cycle	-6.9	3.8	6.8	30286	136	1217	21	1.7	0.37	1104|2962|2963|4927|5434|5901|5902|5903|5905|6749|6829|6917|6923|7175|8086|8148|8480|10762|11198|53371|128866	RCC1|GTF2F1|GTF2F2|NUP88|POLR2E|RAN|RANBP1|RANBP2|RANGAP1|SSRP1|SUPT5H|TCEA1|ELOB|TPR|AAAS|TAF15|RAE1|NUP50|SUPT16H|NUP54|CHMP4B	-5.8
Reactome Gene Sets	6	R-HSA-162599	IM-LGD-L	Late Phase of HIV Life Cycle	-4.9	3.5	5.5	30286	136	1012	16	1.6	0.39	2958|2962|2963|4927|5434|5901|5902|5905|6749|6829|8480|9525|10762|29082|51510|128866	GTF2A2|GTF2F1|GTF2F2|NUP88|POLR2E|RAN|RANBP1|RANGAP1|SSRP1|SUPT5H|RAE1|VPS4B|NUP50|CHMP4A|CHMP5|CHMP4B	-4
Reactome Gene Sets	6	R-HSA-162599	GASTRITIS	Late Phase of HIV Life Cycle	-2.3	2.8	3.2	30286	136	724	9	1.2	0.41	2963|5901|6749|6827|7175|8480|11198|25920|25978	GTF2F2|RAN|SSRP1|SUPT4H1|TPR|RAE1|SUPT16H|NELFB|CHMP2B	-1.9
Reactome Gene Sets	6	R-HSA-162599	GC-NL	Late Phase of HIV Life Cycle	-2.9	2.7	3.8	30286	136	1076	13	1.2	0.33	1104|2962|2963|5434|5901|6233|6749|7175|8086|8480|11198|25920|53371	RCC1|GTF2F1|GTF2F2|POLR2E|RAN|RPS27A|SSRP1|TPR|AAAS|RAE1|SUPT16H|NELFB|NUP54	-2
Reactome Gene Sets	6	R-HSA-69109	GC-NL	Leading Strand Synthesis	-4.1	10	6.5	30286	14	1076	5	0.46	0.21	5111|5424|5981|5982|5984	PCNA|POLD1|RFC1|RFC2|RFC4	-2.9
Reactome Gene Sets	6	R-HSA-69109	GASTRITIS	Leading Strand Synthesis	-2.4	9	4.7	30286	14	724	3	0.41	0.24	5111|5424|5982	PCNA|POLD1|RFC2	-2
Reactome Gene Sets	6	R-HSA-69109	IM-LGD-L	Leading Strand Synthesis	-3	8.6	5.3	30286	14	1012	4	0.4	0.2	5111|5424|5425|5982	PCNA|POLD1|POLD2|RFC2	-2.5
Reactome Gene Sets	6	R-HSA-69109	EGC-L	Leading Strand Synthesis	-3.8	8.9	6	30286	14	1217	5	0.41	0.18	5111|5424|5425|5982|5984	PCNA|POLD1|POLD2|RFC2|RFC4	-3.1
Reactome Gene Sets	6	R-HSA-9658195	GC-NL	Leishmania infection	-4.1	2.9	4.7	30286	164	1076	17	1.6	0.38	718|2788|3162|3326|3606|4067|4627|5336|7454|7456|7525|9844|10095|10552|10787|10910|29108	C3|GNG7|HMOX1|HSP90AB1|IL18|LYN|MYH9|PLCG2|WAS|WIPF1|YES1|ELMO1|ARPC1B|ARPC1A|NCKAP1|SUGT1|PYCARD	-2.9
Reactome Gene Sets	6	R-HSA-9658195	EGC-L	Leishmania infection	-3.9	2.7	4.5	30286	164	1217	18	1.5	0.35	718|2778|2788|3326|3606|4067|4627|4907|5577|7456|10095|10552|10787|10910|23191|29108|54331|55970	C3|GNAS|GNG7|HSP90AB1|IL18|LYN|MYH9|NT5E|PRKAR2B|WIPF1|ARPC1B|ARPC1A|NCKAP1|SUGT1|CYFIP1|PYCARD|GNG2|GNG12	-3.2
Reactome Gene Sets	6	R-HSA-9658195	GASTRITIS	Leishmania infection	-2.7	2.8	3.6	30286	164	724	11	1.5	0.45	3162|3326|4067|4907|5336|7456|8976|9844|10095|29108|79792	HMOX1|HSP90AB1|LYN|NT5E|PLCG2|WIPF1|WASL|ELMO1|ARPC1B|PYCARD|GSDMD	-2.2
Reactome Gene Sets	6	R-HSA-9658195	IM-LGD-L	Leishmania infection	-3.4	2.7	4.1	30286	164	1012	15	1.5	0.38	718|834|2778|2783|3162|3606|4067|4790|7454|8976|10095|10109|10552|10910|29108	C3|CASP1|GNAS|GNB2|HMOX1|IL18|LYN|NFKB1|WAS|WASL|ARPC1B|ARPC2|ARPC1A|SUGT1|PYCARD	-2.8
Reactome Gene Sets	6	R-HSA-9658195	IM-LGD-NL	Leishmania infection	-2	3.3	3.2	30286	164	333	6	1.8	0.73	3326|5336|7454|7456|29108|55970	HSP90AB1|PLCG2|WAS|WIPF1|PYCARD|GNG12	-1.3
Reactome Gene Sets	6	R-HSA-9664417	GC-NL	Leishmania phagocytosis	-3.7	4.3	4.9	30286	59	1076	9	0.84	0.28	4067|4627|7454|7456|7525|9844|10095|10552|10787	LYN|MYH9|WAS|WIPF1|YES1|ELMO1|ARPC1B|ARPC1A|NCKAP1	-2.6
Reactome Gene Sets	6	R-HSA-9664417	EGC-L	Leishmania phagocytosis	-2	3	3.1	30286	59	1217	7	0.58	0.22	4067|4627|7456|10095|10552|10787|23191	LYN|MYH9|WIPF1|ARPC1B|ARPC1A|NCKAP1|CYFIP1	-1.7
Reactome Gene Sets	6	R-HSA-8876384	GC-L	Listeria monocytogenes entry into host cells	-2.9	14	5.9	30286	20	336	3	0.89	0.51	6455|6456|30011	SH3GL1|SH3GL2|SH3KBP1	-2.4
Reactome Gene Sets	6	R-HSA-8876384	GASTRITIS	Listeria monocytogenes entry into host cells	-2.9	8.4	5.2	30286	20	724	4	0.55	0.28	867|6456|8027|30011	CBL|SH3GL2|STAM|SH3KBP1	-2.4
Reactome Gene Sets	6	R-HSA-8876384	GC-NL	Listeria monocytogenes entry into host cells	-3.3	7	5.2	30286	20	1076	5	0.46	0.21	867|6233|6455|8027|30011	CBL|RPS27A|SH3GL1|STAM|SH3KBP1	-2.3
Reactome Gene Sets	6	R-HSA-8876384	EGC-L	Listeria monocytogenes entry into host cells	-3	6.2	4.8	30286	20	1217	5	0.41	0.18	867|2060|6455|8027|30011	CBL|EPS15|SH3GL1|STAM|SH3KBP1	-2.5
Reactome Gene Sets	6	R-HSA-380259	EGC-L	Loss of Nlp from mitotic centrosomes	-2.7	3.2	3.8	30286	70	1217	9	0.74	0.25	983|3320|5048|5108|5577|10121|10382|22919|203068	CDK1|HSP90AA1|PAFAH1B1|PCM1|PRKAR2B|ACTR1A|TUBB4A|MAPRE1|TUBB	-2.2
Reactome Gene Sets	6	R-HSA-380284	EGC-L	Loss of proteins required for interphase microtubule organization from the centrosome	-2.7	3.2	3.8	30286	70	1217	9	0.74	0.25	983|3320|5048|5108|5577|10121|10382|22919|203068	CDK1|HSP90AA1|PAFAH1B1|PCM1|PRKAR2B|ACTR1A|TUBB4A|MAPRE1|TUBB	-2.2
Reactome Gene Sets	6	R-HSA-71064	EGC-L	Lysine catabolism	-4.2	10	6.6	30286	12	1217	5	0.41	0.18	501|1743|2639|55526|85007	ALDH7A1|DLST|GCDH|DHTKD1|PHYKPL	-3.4
Reactome Gene Sets	6	R-HSA-71064	GC-NL	Lysine catabolism	-2.1	7	4	30286	12	1076	3	0.28	0.16	1743|2639|55526	DLST|GCDH|DHTKD1	-1.4
Reactome Gene Sets	6	R-HSA-432720	GC-L	Lysosome Vesicle Biogenesis	-4.4	13	7.4	30286	35	336	5	1.5	0.66	1174|1522|6456|10053|81567	AP1S1|CTSZ|SH3GL2|AP1M2|TXNDC5	-3.6
Reactome Gene Sets	6	R-HSA-432720	GASTRITIS	Lysosome Vesicle Biogenesis	-3.8	7.2	5.7	30286	35	724	6	0.83	0.34	1174|1522|1777|6456|10053|81567	AP1S1|CTSZ|DNASE2|SH3GL2|AP1M2|TXNDC5	-3.1
Reactome Gene Sets	6	R-HSA-432720	GC-NL	Lysosome Vesicle Biogenesis	-4.6	6.4	6.2	30286	35	1076	8	0.74	0.26	164|1174|1213|1522|6844|8673|10053|81567	AP1G1|AP1S1|CLTC|CTSZ|VAMP2|VAMP8|AP1M2|TXNDC5	-3.3
Reactome Gene Sets	6	R-HSA-432720	EGC-L	Lysosome Vesicle Biogenesis	-3.4	5	4.8	30286	35	1217	7	0.58	0.22	164|1174|1522|1777|3312|6844|10053	AP1G1|AP1S1|CTSZ|DNASE2|HSPA8|VAMP2|AP1M2	-2.8
Reactome Gene Sets	6	R-HSA-432720	IM-LGD-L	Lysosome Vesicle Biogenesis	-3	5.1	4.5	30286	35	1012	6	0.59	0.24	164|1174|1522|3312|6844|81567	AP1G1|AP1S1|CTSZ|HSPA8|VAMP2|TXNDC5	-2.5
Reactome Gene Sets	6	R-HSA-432720	IM-LGD-NL	Lysosome Vesicle Biogenesis	-3.2	10	5.9	30286	35	333	4	1.2	0.6	1174|1522|10053|81567	AP1S1|CTSZ|AP1M2|TXNDC5	-2.2
Reactome Gene Sets	6	R-HSA-432720	EGC-NL	Lysosome Vesicle Biogenesis	-3.4	22	7.7	30286	35	120	3	2.5	1.4	1174|1522|2799	AP1S1|CTSZ|GNS	-2.4
Reactome Gene Sets	6	R-HSA-68886	EGC-L	M Phase	-6.4	2.4	5.8	30286	417	1217	40	3.3	0.51	983|1104|1783|3320|3837|4001|4927|5048|5108|5577|5696|5699|5704|5710|5721|5901|5903|5905|7112|7175|7329|8086|8243|8480|9126|10121|10382|10592|10726|10762|22919|23592|53371|55920|81027|84617|128312|128866|203068|221496	CDK1|RCC1|DYNC1LI2|HSP90AA1|KPNB1|LMNB1|NUP88|PAFAH1B1|PCM1|PRKAR2B|PSMB8|PSMB10|PSMC4|PSMD4|PSME2|RAN|RANBP2|RANGAP1|TMPO|TPR|UBE2I|AAAS|SMC1A|RAE1|SMC3|ACTR1A|TUBB4A|SMC2|NUDC|NUP50|MAPRE1|LEMD3|NUP54|RCC2|TUBB1|TUBB6|H2BC26|CHMP4B|TUBB|LEMD2	-5.3
Reactome Gene Sets	6	R-HSA-68886	GASTRITIS	M Phase	-3.3	2.2	3.9	30286	417	724	22	3	0.64	983|3320|3837|4001|5048|5694|5695|5696|5699|5721|5901|7175|7329|8480|9126|10592|23592|25978|55920|84617|203068|221496	CDK1|HSP90AA1|KPNB1|LMNB1|PAFAH1B1|PSMB6|PSMB7|PSMB8|PSMB10|PSME2|RAN|TPR|UBE2I|RAE1|SMC3|SMC2|LEMD3|CHMP2B|RCC2|TUBB6|TUBB|LEMD2	-2.7
Reactome Gene Sets	6	R-HSA-68886	IM-LGD-L	M Phase	-2.1	1.7	2.8	30286	417	1012	24	2.4	0.48	2010|3014|3320|4001|4927|5687|5692|5696|5699|5710|5721|5901|5905|7329|8480|10592|10726|10762|22919|23592|29082|55920|128866|221496	EMD|H2AX|HSP90AA1|LMNB1|NUP88|PSMA6|PSMB4|PSMB8|PSMB10|PSMD4|PSME2|RAN|RANGAP1|UBE2I|RAE1|SMC2|NUDC|NUP50|MAPRE1|LEMD3|CHMP4A|RCC2|CHMP4B|LEMD2	-1.8
Reactome Gene Sets	6	R-HSA-1632852	IM-LGD-L	Macroautophagy	-2.2	2.4	3.1	30286	136	1012	11	1.1	0.33	472|2475|3312|3320|7416|8878|9868|9927|29082|56993|128866	ATM|MTOR|HSPA8|HSP90AA1|VDAC1|SQSTM1|TOMM70|MFN2|CHMP4A|TOMM22|CHMP4B	-1.8
Reactome Gene Sets	6	R-HSA-1632852	EGC-L	Macroautophagy	-2.1	2.2	2.9	30286	136	1217	12	0.99	0.28	1783|2475|3312|3320|7416|7431|8878|9927|10382|81027|84617|128866	DYNC1LI2|MTOR|HSPA8|HSP90AA1|VDAC1|VIM|SQSTM1|MFN2|TUBB4A|TUBB1|TUBB6|CHMP4B	-1.7
Reactome Gene Sets	6	R-HSA-6791226	GC-NL	Major pathway of rRNA processing in the nucleolus and cytosol	-12	4.7	9.7	30286	185	1076	31	2.9	0.51	705|2091|2197|4691|4736|4809|6146|6169|6170|6193|6209|6210|6233|6235|9349|10436|10528|10556|10607|10969|22803|23160|23481|23521|26354|28987|51602|55759|57418|117246|134430	BYSL|FBL|FAU|NCL|RPL10A|SNU13|RPL22|RPL38|RPL39|RPS5|RPS15|RPS15A|RPS27A|RPS29|RPL23|EMG1|NOP56|RPP30|TBL3|EBNA1BP2|XRN2|WDR43|PES1|RPL13A|GNL3|NOB1|NOP58|WDR12|WDR18|FTSJ3|WDR36	-10
Reactome Gene Sets	6	R-HSA-6791226	EGC-L	Major pathway of rRNA processing in the nucleolus and cytosol	-15	4.8	11	30286	185	1217	36	3	0.49	705|2091|4691|4736|4809|6122|6134|6135|6136|6139|6146|6188|6193|6210|6231|10436|10528|10556|10607|10969|11340|22803|23481|23517|23521|26354|28987|51010|51013|51602|54512|55759|56915|57418|117246|118460	BYSL|FBL|NCL|RPL10A|SNU13|RPL3|RPL10|RPL11|RPL12|RPL17|RPL22|RPS3|RPS5|RPS15A|RPS26|EMG1|NOP56|RPP30|TBL3|EBNA1BP2|EXOSC8|XRN2|PES1|MTREX|RPL13A|GNL3|NOB1|EXOSC3|EXOSC1|NOP58|EXOSC4|WDR12|EXOSC5|WDR18|FTSJ3|EXOSC6	-13
Reactome Gene Sets	6	R-HSA-9856872	IM-LGD-L	Malate-aspartate shuttle	-5.3	17	8.7	30286	9	1012	5	0.49	0.22	2805|2806|4190|4191|8402	GOT1|GOT2|MDH1|MDH2|SLC25A11	-4.4
Reactome Gene Sets	6	R-HSA-9856872	GC-NL	Malate-aspartate shuttle	-5.2	16	8.4	30286	9	1076	5	0.46	0.21	2805|2806|4190|4191|8402	GOT1|GOT2|MDH1|MDH2|SLC25A11	-3.8
Reactome Gene Sets	6	R-HSA-9856872	GASTRITIS	Malate-aspartate shuttle	-3	14	6.1	30286	9	724	3	0.41	0.24	2805|2806|4191	GOT1|GOT2|MDH2	-2.4
Reactome Gene Sets	6	R-HSA-9856872	EGC-L	Malate-aspartate shuttle	-3.6	11	6.2	30286	9	1217	4	0.33	0.16	2805|2806|4190|8402	GOT1|GOT2|MDH1|SLC25A11	-2.9
Reactome Gene Sets	6	R-HSA-5674135	GC-NL	MAP2K and MAPK activation	-3.3	4.9	4.8	30286	40	1076	7	0.65	0.25	1445|2243|2244|5037|7094|7450|8826	CSK|FGA|FGB|PEBP1|TLN1|VWF|IQGAP1	-2.3
Reactome Gene Sets	6	R-HSA-5674135	IM-LGD-L	MAP2K and MAPK activation	-2.7	4.5	4.1	30286	40	1012	6	0.59	0.24	1445|2243|2244|3674|4893|7450	CSK|FGA|FGB|ITGA2B|NRAS|VWF	-2.2
Reactome Gene Sets	6	R-HSA-5674135	IM-LGD-NL	MAP2K and MAPK activation	-2	6.8	3.9	30286	40	333	3	0.9	0.52	1445|7094|7450	CSK|TLN1|VWF	-1.3
Reactome Gene Sets	6	R-HSA-5674135	EGC-L	MAP2K and MAPK activation	-2.3	3.7	3.5	30286	40	1217	6	0.49	0.2	1445|2243|2244|3674|7094|8826	CSK|FGA|FGB|ITGA2B|TLN1|IQGAP1	-1.9
Reactome Gene Sets	6	R-HSA-9828806	EGC-L	Maturation of hRSV A proteins	-2.9	7.7	4.9	30286	13	1217	4	0.33	0.16	9789|23478|60559|90701	SPCS2|SEC11A|SPCS3|SEC11C	-2.3
Reactome Gene Sets	6	R-HSA-9854311	GC-NL	Maturation of TCA enzymes and regulation of TCA cycle	-5.4	9.9	7.6	30286	20	1076	7	0.65	0.25	38|50|1431|3418|6390|57128|122961	ACAT1|ACO2|CS|IDH2|SDHB|LYRM4|ISCA2	-4
Reactome Gene Sets	6	R-HSA-9854311	GASTRITIS	Maturation of TCA enzymes and regulation of TCA cycle	-4.1	10	6.6	30286	20	724	5	0.69	0.31	38|50|1431|3418|6390	ACAT1|ACO2|CS|IDH2|SDHB	-3.3
Reactome Gene Sets	6	R-HSA-9854311	IM-LGD-L	Maturation of TCA enzymes and regulation of TCA cycle	-4.4	9	6.6	30286	20	1012	6	0.59	0.24	38|50|1431|3418|6390|122961	ACAT1|ACO2|CS|IDH2|SDHB|ISCA2	-3.6
Reactome Gene Sets	6	R-HSA-9854311	EGC-L	Maturation of TCA enzymes and regulation of TCA cycle	-4	7.5	5.9	30286	20	1217	6	0.49	0.2	38|50|1431|3418|6390|122961	ACAT1|ACO2|CS|IDH2|SDHB|ISCA2	-3.3
Reactome Gene Sets	6	R-HSA-1500620	GASTRITIS	Meiosis	-2.1	2.9	3.2	30286	117	724	8	1.1	0.39	472|4001|4683|6117|7329|9126|10111|54386	ATM|LMNB1|NBN|RPA1|UBE2I|SMC3|RAD50|TERF2IP	-1.8
Reactome Gene Sets	6	R-HSA-1500620	EGC-L	Meiosis	-2.1	2.3	3	30286	117	1217	11	0.9	0.27	4001|4683|6117|6119|7329|8243|9126|10111|11083|54386|128312	LMNB1|NBN|RPA1|RPA3|UBE2I|SMC1A|SMC3|RAD50|DIDO1|TERF2IP|H2BC26	-1.8
Reactome Gene Sets	6	R-HSA-199991	EGC-L	Membrane Trafficking	-10	2.5	7.7	30286	634	1217	63	5.2	0.64	156|164|338|378|381|829|867|966|1075|1173|1174|1522|1777|1783|2060|2590|3267|3312|3998|4627|5048|5050|5869|6455|6844|7018|7037|7110|7534|8027|8546|9026|9554|9882|10053|10113|10121|10382|10552|10960|10972|11196|11252|23256|23423|23637|26958|29978|30011|51594|53407|54732|55770|55850|55860|57465|60412|81027|84617|91949|128866|201475|375056	GRK2|AP1G1|APOB|ARF4|ARF5|CAPZA1|CBL|CD59|CTSC|AP2M1|AP1S1|CTSZ|DNASE2|DYNC1LI2|EPS15|GALNT2|AGFG1|HSPA8|LMAN1|MYH9|PAFAH1B1|PAFAH1B3|RAB5B|SH3GL1|VAMP2|TF|TFRC|TMF1|YWHAZ|STAM|AP3B1|HIP1R|SEC22B|TBC1D4|AP1M2|PREB|ACTR1A|TUBB4A|ARPC1A|LMAN2|TMED10|SEC23IP|PACSIN2|SCFD1|TMED3|RABGAP1|COPG2|UBQLN2|SH3KBP1|NBAS|STX18|TMED9|EXOC2|USE1|ACTR10|TBC1D24|EXOC4|TUBB1|TUBB6|COG7|CHMP4B|RAB12|MIA3	-8.9
Reactome Gene Sets	6	R-HSA-199991	IM-LGD-L	Membrane Trafficking	-8.5	2.5	6.9	30286	634	1012	52	5.1	0.69	156|164|338|382|950|1075|1174|1522|3267|3312|3998|4012|5265|5868|5872|5878|6844|7018|7037|8027|8976|9026|9525|9554|9648|9871|9882|10109|10113|10484|10552|10802|10972|11252|22848|22870|23303|27348|29082|30011|51510|51594|54732|55330|55605|55770|57465|60412|64746|64837|81567|128866	GRK2|AP1G1|APOB|ARF6|SCARB2|CTSC|AP1S1|CTSZ|AGFG1|HSPA8|LMAN1|LNPEP|SERPINA1|RAB5A|RAB13|RAB5C|VAMP2|TF|TFRC|STAM|WASL|HIP1R|VPS4B|SEC22B|GCC2|SEC24D|TBC1D4|ARPC2|PREB|SEC23A|ARPC1A|SEC24A|TMED10|PACSIN2|AAK1|PPP6R1|KIF13B|TOR1B|CHMP4A|SH3KBP1|CHMP5|NBAS|TMED9|BLOC1S4|KIF21A|EXOC2|TBC1D24|EXOC4|ACBD3|KLC2|TXNDC5|CHMP4B	-7.2
Reactome Gene Sets	6	R-HSA-199991	GC-NL	Membrane Trafficking	-7.6	2.3	6.4	30286	634	1076	52	4.8	0.65	156|164|338|381|867|966|1075|1173|1174|1213|1522|1783|2512|2590|3267|3998|4627|5048|5265|5867|6233|6455|6844|7037|8027|8546|8673|9026|9882|10053|10121|10466|10484|10552|11252|23303|23637|27333|29978|30011|51138|51594|51762|54732|55860|57465|81567|83548|84342|84617|84958|91949	GRK2|AP1G1|APOB|ARF5|CBL|CD59|CTSC|AP2M1|AP1S1|CLTC|CTSZ|DYNC1LI2|FTL|GALNT2|AGFG1|LMAN1|MYH9|PAFAH1B1|SERPINA1|RAB4A|RPS27A|SH3GL1|VAMP2|TFRC|STAM|AP3B1|VAMP8|HIP1R|TBC1D4|AP1M2|ACTR1A|COG5|SEC23A|ARPC1A|PACSIN2|KIF13B|RABGAP1|GOLIM4|UBQLN2|SH3KBP1|COPS4|NBAS|RAB8B|TMED9|ACTR10|TBC1D24|TXNDC5|COG3|COG8|TUBB6|SYTL1|COG7	-5.9
Reactome Gene Sets	6	R-HSA-199991	GASTRITIS	Membrane Trafficking	-5.3	2.3	5.2	30286	634	724	35	4.8	0.8	156|381|829|867|966|1075|1174|1522|1777|1956|2590|4012|5048|5867|6456|7037|7529|8027|8976|9026|9882|10053|10484|22870|23048|23423|25978|30011|51762|53407|55850|57465|81567|84617|201475	GRK2|ARF5|CAPZA1|CBL|CD59|CTSC|AP1S1|CTSZ|DNASE2|EGFR|GALNT2|LNPEP|PAFAH1B1|RAB4A|SH3GL2|TFRC|YWHAB|STAM|WASL|HIP1R|TBC1D4|AP1M2|SEC23A|PPP6R1|FNBP1|TMED3|CHMP2B|SH3KBP1|RAB8B|STX18|USE1|TBC1D24|TXNDC5|TUBB6|RAB12	-4.4
Reactome Gene Sets	6	R-HSA-199991	GC-L	Membrane Trafficking	-3.5	2.6	4.2	30286	634	336	18	5.4	1.2	966|1075|1174|1522|2590|3267|4012|6455|6456|7110|10053|10466|26958|30011|51594|55605|55850|81567	CD59|CTSC|AP1S1|CTSZ|GALNT2|AGFG1|LNPEP|SH3GL1|SH3GL2|TMF1|AP1M2|COG5|COPG2|SH3KBP1|NBAS|KIF21A|USE1|TXNDC5	-2.9
Reactome Gene Sets	6	R-HSA-199991	IM-LGD-NL	Membrane Trafficking	-3.6	2.6	4.2	30286	634	333	18	5.4	1.2	867|1075|1174|1522|5048|5867|6810|7037|7110|8027|10053|10466|10484|26958|55605|57465|81027|81567	CBL|CTSC|AP1S1|CTSZ|PAFAH1B1|RAB4A|STX4|TFRC|TMF1|STAM|AP1M2|COG5|SEC23A|COPG2|KIF21A|TBC1D24|TUBB1|TXNDC5	-2.5
Reactome Gene Sets	6	R-HSA-199991	EGC-NL	Membrane Trafficking	-3	3.6	4.1	30286	634	120	9	7.5	2.4	1174|1522|2799|4124|7037|25978|55605|60412|201475	AP1S1|CTSZ|GNS|MAN2A1|TFRC|CHMP2B|KIF21A|EXOC4|RAB12	-2.1
Reactome Gene Sets	6	R-HSA-71291	GASTRITIS	Metabolism of amino acids and derivatives	-16	4.8	11	30286	367	724	42	5.8	0.87	36|38|501|549|593|594|635|1152|1160|1629|1743|2653|2746|2752|2805|2806|3028|3081|3712|4329|4942|5694|5695|5696|5699|5721|6209|6723|6821|8140|10247|11112|23498|27034|50506|56922|64087|80150|92259|125061|200916|259307	ACADSB|ACAT1|ALDH7A1|AUH|BCKDHA|BCKDHB|BHMT|CKB|CKMT2|DBT|DLST|GCSH|GLUD1|GLUL|GOT1|GOT2|HSD17B10|HGD|IVD|ALDH6A1|OAT|PSMB6|PSMB7|PSMB8|PSMB10|PSME2|RPS15|SRM|SUOX|SLC7A5|RIDA|HIBADH|HAAO|ACAD8|DUOX2|MCCC1|MCCC2|ASRGL1|KGD4|AFMID|RPL22L1|IL4I1	-14
Reactome Gene Sets	6	R-HSA-71291	GC-L	Metabolism of amino acids and derivatives	-5.4	3.9	6	30286	367	336	16	4.8	1.2	223|1468|2197|2628|2653|2752|3028|5696|5699|5721|6193|6209|27034|51074|55349|80150	ALDH9A1|SLC25A10|FAU|GATM|GCSH|GLUL|HSD17B10|PSMB8|PSMB10|PSME2|RPS5|RPS15|ACAD8|APIP|CHDH|ASRGL1	-4.4
Reactome Gene Sets	6	R-HSA-71291	IM-LGD-NL	Metabolism of amino acids and derivatives	-6.8	4.5	7	30286	367	333	18	5.4	1.2	223|635|1629|2197|2653|2746|2752|3028|3712|4329|6209|10247|23498|27034|55349|56922|80150|259307	ALDH9A1|BHMT|DBT|FAU|GCSH|GLUD1|GLUL|HSD17B10|IVD|ALDH6A1|RPS15|RIDA|HAAO|ACAD8|CHDH|MCCC1|ASRGL1|IL4I1	-5.2
Reactome Gene Sets	6	R-HSA-71291	GC-NL	Metabolism of amino acids and derivatives	-22	4.6	13	30286	367	1076	60	5.6	0.7	36|38|223|445|549|587|593|594|635|1152|1160|1629|1743|1892|2197|2593|2628|2639|2653|2746|2752|2805|2806|3028|3376|3712|4329|4736|5695|5704|5723|6146|6169|6170|6193|6209|6210|6233|6235|6723|6821|9060|9061|9349|9380|11112|23474|23521|26227|27034|51074|55349|55526|56922|64087|79814|80150|92259|113675|259307	ACADSB|ACAT1|ALDH9A1|ASS1|AUH|BCAT2|BCKDHA|BCKDHB|BHMT|CKB|CKMT2|DBT|DLST|ECHS1|FAU|GAMT|GATM|GCDH|GCSH|GLUD1|GLUL|GOT1|GOT2|HSD17B10|IARS1|IVD|ALDH6A1|RPL10A|PSMB7|PSMC4|PSPH|RPL22|RPL38|RPL39|RPS5|RPS15|RPS15A|RPS27A|RPS29|SRM|SUOX|PAPSS2|PAPSS1|RPL23|GRHPR|HIBADH|ETHE1|RPL13A|PHGDH|ACAD8|APIP|CHDH|DHTKD1|MCCC1|MCCC2|AGMAT|ASRGL1|KGD4|SDSL|IL4I1	-20
Reactome Gene Sets	6	R-HSA-71291	EGC-L	Metabolism of amino acids and derivatives	-20	4.1	12	30286	367	1217	60	4.9	0.62	36|38|191|223|445|501|549|587|593|594|635|1152|1160|1468|1629|1743|1892|2639|2653|2746|2752|2805|2806|2875|3028|3376|3712|4141|4329|4736|5696|5699|5704|5710|5721|6122|6134|6135|6136|6139|6146|6188|6193|6210|6231|6821|9060|11112|23474|23521|26227|27034|55526|56922|64087|79814|80150|85007|92259|259307	ACADSB|ACAT1|AHCY|ALDH9A1|ASS1|ALDH7A1|AUH|BCAT2|BCKDHA|BCKDHB|BHMT|CKB|CKMT2|SLC25A10|DBT|DLST|ECHS1|GCDH|GCSH|GLUD1|GLUL|GOT1|GOT2|GPT|HSD17B10|IARS1|IVD|MARS1|ALDH6A1|RPL10A|PSMB8|PSMB10|PSMC4|PSMD4|PSME2|RPL3|RPL10|RPL11|RPL12|RPL17|RPL22|RPS3|RPS5|RPS15A|RPS26|SUOX|PAPSS2|HIBADH|ETHE1|RPL13A|PHGDH|ACAD8|DHTKD1|MCCC1|MCCC2|AGMAT|ASRGL1|PHYKPL|KGD4|IL4I1	-18
Reactome Gene Sets	6	R-HSA-71291	IM-LGD-L	Metabolism of amino acids and derivatives	-16	4.1	11	30286	367	1012	50	4.9	0.68	36|38|223|549|587|593|594|635|1152|1160|1468|1629|1743|1892|2197|2639|2653|2752|2805|2806|3028|3712|4329|4942|5009|5687|5692|5696|5699|5710|5721|6146|6231|6821|8140|9061|10247|11112|23474|23498|26227|27034|51540|56922|58478|64087|79814|80150|92259|200916	ACADSB|ACAT1|ALDH9A1|AUH|BCAT2|BCKDHA|BCKDHB|BHMT|CKB|CKMT2|SLC25A10|DBT|DLST|ECHS1|FAU|GCDH|GCSH|GLUL|GOT1|GOT2|HSD17B10|IVD|ALDH6A1|OAT|OTC|PSMA6|PSMB4|PSMB8|PSMB10|PSMD4|PSME2|RPL22|RPS26|SUOX|SLC7A5|PAPSS1|RIDA|HIBADH|ETHE1|HAAO|PHGDH|ACAD8|SCLY|MCCC1|ENOPH1|MCCC2|AGMAT|ASRGL1|KGD4|RPL22L1	-15
Reactome Gene Sets	6	R-HSA-71387	GC-NL	Metabolism of carbohydrates	-7.2	3	6.6	30286	290	1076	31	2.9	0.51	178|216|230|669|960|1464|2203|2582|2592|2990|2992|3101|4125|5091|5214|5261|5634|5836|6233|6548|6652|7175|8086|8480|8789|9060|9061|11261|51181|53371|55276	AGL|ALDH1A1|ALDOC|BPGM|CD44|CSPG4|FBP1|GALE|GALT|GUSB|GYG1|HK3|MAN2B1|PC|PFKP|PHKG2|PRPS2|PYGL|RPS27A|SLC9A1|SORD|TPR|AAAS|RAE1|FBP2|PAPSS2|PAPSS1|CHP1|DCXR|NUP54|PGM2	-5.5
Reactome Gene Sets	6	R-HSA-71387	EGC-L	Metabolism of carbohydrates	-7.1	2.8	6.4	30286	290	1217	33	2.7	0.47	178|216|226|960|2023|2582|2592|2597|2990|2992|3074|4125|4927|5091|5214|5226|5261|5634|5903|6548|6888|7175|7360|8086|8480|8789|9060|10762|11261|51181|53371|55276|64132	AGL|ALDH1A1|ALDOA|CD44|ENO1|GALE|GALT|GAPDH|GUSB|GYG1|HEXB|MAN2B1|NUP88|PC|PFKP|PGD|PHKG2|PRPS2|RANBP2|SLC9A1|TALDO1|TPR|UGP2|AAAS|RAE1|FBP2|PAPSS2|NUP50|CHP1|DCXR|NUP54|PGM2|XYLT2	-5.9
Reactome Gene Sets	6	R-HSA-71387	GASTRITIS	Metabolism of carbohydrates	-2.7	2.3	3.5	30286	290	724	16	2.2	0.55	178|216|229|669|960|2990|2992|4125|5214|5261|5634|7175|7360|8480|8789|55276	AGL|ALDH1A1|ALDOB|BPGM|CD44|GUSB|GYG1|MAN2B1|PFKP|PHKG2|PRPS2|TPR|UGP2|RAE1|FBP2|PGM2	-2.3
Reactome Gene Sets	6	R-HSA-71387	IM-LGD-L	Metabolism of carbohydrates	-3.9	2.4	4.4	30286	290	1012	23	2.3	0.47	178|216|633|669|960|2524|2990|2992|3074|3099|4927|5091|5214|5261|5634|8480|8789|9061|10762|22934|51181|55276|64132	AGL|ALDH1A1|BGN|BPGM|CD44|FUT2|GUSB|GYG1|HEXB|HK2|NUP88|PC|PFKP|PHKG2|PRPS2|RAE1|FBP2|PAPSS1|NUP50|RPIA|DCXR|PGM2|XYLT2	-3.2
Reactome Gene Sets	6	R-HSA-8978934	GC-NL	Metabolism of cofactors	-4.7	7.9	6.6	30286	25	1076	7	0.65	0.25	48|5805|51004|51805|56997|57017|84274	ACO1|PTS|COQ6|COQ3|COQ8A|COQ9|COQ5	-3.4
Reactome Gene Sets	6	R-HSA-8978934	EGC-L	Metabolism of cofactors	-4.4	7	6.1	30286	25	1217	7	0.58	0.22	48|3320|5805|51805|56997|57017|84274	ACO1|HSP90AA1|PTS|COQ3|COQ8A|COQ9|COQ5	-3.6
Reactome Gene Sets	6	R-HSA-8978934	GASTRITIS	Metabolism of cofactors	-8.5	15	11	30286	25	724	9	1.2	0.41	48|3320|6697|51004|51805|56997|57017|79934|84274	ACO1|HSP90AA1|SPR|COQ6|COQ3|COQ8A|COQ9|COQ8B|COQ5	-7.2
Reactome Gene Sets	6	R-HSA-8978934	IM-LGD-L	Metabolism of cofactors	-8.5	12	10	30286	25	1012	10	0.99	0.31	48|3320|5805|6697|51004|51805|56997|57017|79934|84274	ACO1|HSP90AA1|PTS|SPR|COQ6|COQ3|COQ8A|COQ9|COQ8B|COQ5	-7.2
Reactome Gene Sets	6	R-HSA-6806667	IM-LGD-L	Metabolism of fat-soluble vitamins	-5.5	6.2	6.7	30286	48	1012	10	0.99	0.31	335|336|337|338|344|345|348|5948|5950|51109	APOA1|APOA2|APOA4|APOB|APOC2|APOC3|APOE|RBP2|RBP4|RDH11	-4.5
Reactome Gene Sets	6	R-HSA-6806667	EGC-L	Metabolism of fat-soluble vitamins	-2.5	3.6	3.7	30286	48	1217	7	0.58	0.22	335|337|338|344|345|348|51109	APOA1|APOA4|APOB|APOC2|APOC3|APOE|RDH11	-2.1
Reactome Gene Sets	6	R-HSA-6806667	GC-NL	Metabolism of fat-soluble vitamins	-2.2	3.5	3.4	30286	48	1076	6	0.56	0.23	338|344|345|348|8644|57016	APOB|APOC2|APOC3|APOE|AKR1C3|AKR1B10	-1.4
Reactome Gene Sets	6	R-HSA-196757	EGC-L	Metabolism of folate and pterines	-2.4	5.9	4.1	30286	17	1217	4	0.33	0.16	2350|4522|6472|10797	FOLR2|MTHFD1|SHMT2|MTHFD2	-2
Reactome Gene Sets	6	R-HSA-556833	IM-LGD-L	Metabolism of lipids	-15	2.9	9.8	30286	757	1012	73	7.2	0.81	31|34|35|38|183|335|336|622|706|788|1120|1376|1384|1666|1892|2168|2169|2181|2230|2274|2524|2638|2819|2820|2879|3030|3032|3074|3155|4594|4598|5019|5095|5130|5297|5499|5641|5868|5901|6822|7329|7923|8540|8821|8904|9517|9871|9967|10455|10484|10498|10728|10802|10809|23646|25979|27132|27349|51144|51170|51703|55326|55361|55697|55856|79887|80142|80765|84693|197322|376497|390916|100137049	ACACA|ACADM|ACADS|ACAT1|AGT|APOA1|APOA2|BDH1|TSPO|SLC25A20|CHKB|CPT2|CRAT|DECR1|ECHS1|FABP1|FABP2|ACSL3|FDX1|FHL2|FUT2|GC|GPD1|GPD2|GPX4|HADHA|HADHB|HEXB|HMGCL|MMUT|MVK|OXCT1|PCCA|PCYT1A|PI4KA|PPP1CA|LGMN|RAB5A|RAN|SULT2A1|UBE2I|HSD17B8|AGPS|INPP4B|CPNE1|SPTLC2|SEC24D|THRAP3|ECI2|SEC23A|CARM1|PTGES3|SEC24A|STARD10|PLD3|DHRS7B|CPNE7|MCAT|HSD17B12|HSD17B11|ACSL5|AGPAT5|PI4K2A|VAC14|ACOT13|PLBD1|PTG…	-14
Reactome Gene Sets	6	R-HSA-556833	GC-NL	Metabolism of lipids	-8.5	2.3	6.8	30286	757	1076	61	5.7	0.7	34|35|38|39|622|706|788|873|1120|1376|1384|1646|1666|1892|2166|2168|2171|2182|2230|2760|2819|2820|3030|3032|3155|3422|4534|4594|4598|5019|5095|5289|5297|5833|5867|5901|6822|7329|8540|8644|8776|8904|9967|10455|10484|10498|10809|23171|25865|25979|51703|55697|55856|80142|80221|80765|84693|197322|376497|390916|100137049	ACADM|ACADS|ACAT1|ACAT2|BDH1|TSPO|SLC25A20|CBR1|CHKB|CPT2|CRAT|AKR1C2|DECR1|ECHS1|FAAH|FABP1|FABP5|ACSL4|FDX1|GM2A|GPD1|GPD2|HADHA|HADHB|HMGCL|IDI1|MTM1|MMUT|MVK|OXCT1|PCCA|PIK3C3|PI4KA|PCYT2|RAB4A|RAN|SULT2A1|UBE2I|AGPS|AKR1C3|MTMR1|CPNE1|THRAP3|ECI2|SEC23A|CARM1|STARD10|GPD1L|PRKD2|DHRS7B|ACSL5|VAC14|ACOT13|PTGES2|ACSF2|STARD5|MCEE|ACSF3|SLC27A1|NUDT19|PLA2G4B	-6.7
Reactome Gene Sets	6	R-HSA-556833	GASTRITIS	Metabolism of lipids	-5.9	2.3	5.5	30286	757	724	41	5.7	0.86	35|38|183|622|706|1376|1384|1666|2166|2171|2820|3030|3032|3155|3837|4534|5019|5095|5444|5641|5867|5901|7329|8904|9261|9967|10455|10484|10728|10809|23171|23646|25865|25979|27349|55856|80221|80765|84693|390916|100137049	ACADS|ACAT1|AGT|BDH1|TSPO|CPT2|CRAT|DECR1|FAAH|FABP5|GPD2|HADHA|HADHB|HMGCL|KPNB1|MTM1|OXCT1|PCCA|PON1|LGMN|RAB4A|RAN|UBE2I|CPNE1|MAPKAPK2|THRAP3|ECI2|SEC23A|PTGES3|STARD10|GPD1L|PLD3|PRKD2|DHRS7B|MCAT|ACOT13|ACSF2|STARD5|MCEE|NUDT19|PLA2G4B	-4.9
Reactome Gene Sets	6	R-HSA-556833	GC-L	Metabolism of lipids	-3.9	2.5	4.4	30286	757	336	21	6.2	1.3	622|706|788|1120|2166|2168|2717|5095|5297|5641|8776|8904|9261|51144|55326|55856|80765|84693|197322|376497|390916	BDH1|TSPO|SLC25A20|CHKB|FAAH|FABP1|GLA|PCCA|PI4KA|LGMN|MTMR1|CPNE1|MAPKAPK2|HSD17B12|AGPAT5|ACOT13|STARD5|MCEE|ACSF3|SLC27A1|NUDT19	-3.2
Reactome Gene Sets	6	R-HSA-556833	EGC-L	Metabolism of lipids	-5.6	1.9	5.2	30286	757	1217	58	4.8	0.61	31|34|35|38|224|335|706|788|1120|1374|1376|1384|1666|1892|2181|2182|2717|2819|2820|3030|3032|3074|3155|3422|3837|4594|5019|5095|5130|5297|5833|5901|6822|7329|8540|8904|9217|9967|10455|10498|10728|10809|23171|25865|25979|51144|51495|55512|55697|55856|79152|79718|80221|84693|197322|376497|390916|100137049	ACACA|ACADM|ACADS|ACAT1|ALDH3A2|APOA1|TSPO|SLC25A20|CHKB|CPT1A|CPT2|CRAT|DECR1|ECHS1|ACSL3|ACSL4|GLA|GPD1|GPD2|HADHA|HADHB|HEXB|HMGCL|IDI1|KPNB1|MMUT|OXCT1|PCCA|PCYT1A|PI4KA|PCYT2|RAN|SULT2A1|UBE2I|AGPS|CPNE1|VAPB|THRAP3|ECI2|CARM1|PTGES3|STARD10|GPD1L|PRKD2|DHRS7B|HSD17B12|HACD3|SMPD3|VAC14|ACOT13|FA2H|TBL1XR1|ACSF2|MCEE|ACSF3|SLC27A1|NUDT19|PLA2G4B	-4.6
Reactome Gene Sets	6	R-HSA-556833	IM-LGD-NL	Metabolism of lipids	-2.3	2	3.1	30286	757	333	17	5.1	1.2	31|622|706|1120|2166|2820|3155|3157|5095|5298|5867|10484|10728|27132|51144|55361|100137049	ACACA|BDH1|TSPO|CHKB|FAAH|GPD2|HMGCL|HMGCS1|PCCA|PI4KB|RAB4A|SEC23A|PTGES3|CPNE7|HSD17B12|PI4K2A|PLA2G4B	-1.5
Reactome Gene Sets	6	R-HSA-202131	GASTRITIS	Metabolism of nitric oxide: NOS3 activation and regulation	-4.6	13	7.6	30286	16	724	5	0.69	0.31	3320|6697|8976|51070|115677	HSP90AA1|SPR|WASL|NOSIP|NOSTRIN	-3.7
Reactome Gene Sets	6	R-HSA-202131	IM-LGD-L	Metabolism of nitric oxide: NOS3 activation and regulation	-3.9	9.4	6.2	30286	16	1012	5	0.49	0.22	3320|6697|8976|10434|115677	HSP90AA1|SPR|WASL|LYPLA1|NOSTRIN	-3.2
Reactome Gene Sets	6	R-HSA-194441	EGC-L	Metabolism of non-coding RNA	-6.9	6.1	7.6	30286	53	1217	13	1.1	0.29	1207|4927|5903|6628|6633|6634|6636|6637|7175|8086|8480|10762|53371	CLNS1A|NUP88|RANBP2|SNRPB|SNRPD2|SNRPD3|SNRPF|SNRPG|TPR|AAAS|RAE1|NUP50|NUP54	-5.8
Reactome Gene Sets	6	R-HSA-194441	GC-NL	Metabolism of non-coding RNA	-2.6	3.7	3.8	30286	53	1076	7	0.65	0.25	1207|6632|6634|7175|8086|8480|53371	CLNS1A|SNRPD1|SNRPD3|TPR|AAAS|RAE1|NUP54	-1.7
Reactome Gene Sets	6	R-HSA-194441	IM-LGD-L	Metabolism of non-coding RNA	-2.1	3.4	3.2	30286	53	1012	6	0.59	0.24	1207|4927|6628|6636|8480|10762	CLNS1A|NUP88|SNRPB|SNRPF|RAE1|NUP50	-1.8
Reactome Gene Sets	6	R-HSA-15869	GASTRITIS	Metabolism of nucleotides	-2.6	3.4	3.7	30286	99	724	8	1.1	0.39	100|203|790|1723|1806|3615|4907|221264	ADA|AK1|CAD|DHODH|DPYD|IMPDH2|NT5E|AK9	-2.1
Reactome Gene Sets	6	R-HSA-15869	EGC-L	Metabolism of nucleotides	-3.2	3	4.1	30286	99	1217	12	0.99	0.28	100|353|978|1503|1633|2618|3615|4907|7378|11164|30833|79077	ADA|APRT|CDA|CTPS1|DCK|GART|IMPDH2|NT5E|UPP1|NUDT5|NT5C|DCTPP1	-2.6
Reactome Gene Sets	6	R-HSA-15869	IM-LGD-L	Metabolism of nucleotides	-2.8	3	3.7	30286	99	1012	10	0.99	0.31	100|271|978|1633|1723|3615|7372|56474|79077|221264	ADA|AMPD2|CDA|DCK|DHODH|IMPDH2|UMPS|CTPS2|DCTPP1|AK9	-2.3
Reactome Gene Sets	6	R-HSA-15869	GC-NL	Metabolism of nucleotides	-2.6	2.8	3.5	30286	99	1076	10	0.93	0.29	100|790|978|1633|1723|3614|3615|7378|30833|221264	ADA|CAD|CDA|DCK|DHODH|IMPDH1|IMPDH2|UPP1|NT5C|AK9	-1.7
Reactome Gene Sets	6	R-HSA-351202	GASTRITIS	Metabolism of polyamines	-2.6	4.3	3.9	30286	59	724	6	0.83	0.34	5694|5695|5696|5699|5721|6723	PSMB6|PSMB7|PSMB8|PSMB10|PSME2|SRM	-2.1
Reactome Gene Sets	6	R-HSA-351202	IM-LGD-L	Metabolism of polyamines	-2.5	3.6	3.6	30286	59	1012	7	0.69	0.26	5687|5692|5696|5699|5710|5721|79814	PSMA6|PSMB4|PSMB8|PSMB10|PSMD4|PSME2|AGMAT	-2
Reactome Gene Sets	6	R-HSA-189445	IM-LGD-L	Metabolism of porphyrins	-2.7	5.5	4.4	30286	27	1012	5	0.49	0.22	2168|2235|3162|5498|28982	FABP1|FECH|HMOX1|PPOX|FLVCR1	-2.3
Reactome Gene Sets	6	R-HSA-189445	GC-NL	Metabolism of porphyrins	-2.6	5.2	4.2	30286	27	1076	5	0.46	0.21	644|2168|3162|3163|28982	BLVRA|FABP1|HMOX1|HMOX2|FLVCR1	-1.8
Reactome Gene Sets	6	R-HSA-8953854	GASTRITIS	Metabolism of RNA	-9	2.7	7.3	30286	726	724	47	6.5	0.92	103|1477|1478|1973|2963|3028|3181|3191|4236|4670|4809|5356|5694|5695|5696|5699|5721|5901|6209|6428|6429|6431|6634|6636|7175|7529|8106|8480|8570|9261|9877|9879|10128|10250|10946|23398|23517|23524|27350|28960|51690|54931|55802|83443|84324|200916|220988	ADAR|CSTF1|CSTF2|EIF4A1|GTF2F2|HSD17B10|HNRNPA2B1|HNRNPL|MFAP1|HNRNPM|SNU13|PLRG1|PSMB6|PSMB7|PSMB8|PSMB10|PSME2|RAN|RPS15|SRSF3|SRSF4|SRSF6|SNRPD3|SNRPF|TPR|YWHAB|PABPN1|RAE1|KHSRP|MAPKAPK2|ZC3H11A|DDX46|LRPPRC|SRRM1|SF3A3|PPWD1|MTREX|SRRM2|APOBEC3C|DCPS|LSM7|TRMT10C|DCP1A|SF3B5|SARNP|RPL22L1|HNRNPA3	-7.7
Reactome Gene Sets	6	R-HSA-8953854	GC-L	Metabolism of RNA	-4.6	2.7	5	30286	726	336	22	6.5	1.3	2197|2962|2963|3028|3184|3191|5511|5696|5699|5721|6193|6209|6431|6499|9261|9589|9652|9877|10556|22826|54433|220988	FAU|GTF2F1|GTF2F2|HSD17B10|HNRNPD|HNRNPL|PPP1R8|PSMB8|PSMB10|PSME2|RPS5|RPS15|SRSF6|SKIC2|MAPKAPK2|WTAP|SKIC3|ZC3H11A|RPP30|DNAJC8|GAR1|HNRNPA3	-3.8
Reactome Gene Sets	6	R-HSA-8953854	EGC-L	Metabolism of RNA	-65	5.2	23	30286	726	1217	152	12	0.95	103|705|988|1207|1477|1478|1655|1660|1665|1973|2091|2962|2963|3028|3185|3187|3191|3312|3315|3550|4236|4670|4691|4736|4809|4927|5356|5411|5434|5511|5580|5696|5699|5704|5710|5721|5725|5901|5903|6122|6134|6135|6136|6139|6146|6188|6193|6210|6231|6428|6429|6431|6499|6627|6628|6633|6634|6636|6637|6829|7175|7307|7534|8086|8106|8480|8570|8683|8896|9128|9130|9295|9416|9589|9652|9775|9879|10179|10189|10250…	ADAR|BYSL|CDC5L|CLNS1A|CSTF1|CSTF2|DDX5|DHX9|DHX15|EIF4A1|FBL|GTF2F1|GTF2F2|HSD17B10|HNRNPF|HNRNPH1|HNRNPL|HSPA8|HSPB1|IK|MFAP1|HNRNPM|NCL|RPL10A|SNU13|NUP88|PLRG1|PNN|POLR2E|PPP1R8|PRKCD|PSMB8|PSMB10|PSMC4|PSMD4|PSME2|PTBP1|RAN|RANBP2|RPL3|RPL10|RPL11|RPL12|RPL17|RPL22|RPS3|RPS5|RPS15A|RPS26|SRSF3|SRSF4|SRSF6|SKIC2|SNRPA1|SNRPB|SNRPD2|SNRPD3|SNRPF|SNRPG|SUPT5H|TPR|U2AF1|YWHAZ|AAAS|PABPN1|RAE1|KH…	-62
Reactome Gene Sets	6	R-HSA-8953854	GC-NL	Metabolism of RNA	-24	3.5	13	30286	726	1076	89	8.3	0.84	705|988|1207|1478|1660|1665|2091|2197|2962|2963|3028|3181|3184|3191|4236|4670|4691|4736|4809|4904|5411|5434|5580|5695|5704|5725|5901|6146|6169|6170|6193|6209|6210|6233|6235|6431|6499|6627|6632|6634|7175|8086|8106|8480|9129|9130|9349|9416|9652|9877|10189|10250|10286|10436|10528|10556|10594|10607|10915|10946|10969|11051|22803|22826|23160|23450|23481|23521|24148|26354|27336|28960|28987|51504|51602|5…	BYSL|CDC5L|CLNS1A|CSTF2|DHX9|DHX15|FBL|FAU|GTF2F1|GTF2F2|HSD17B10|HNRNPA2B1|HNRNPD|HNRNPL|MFAP1|HNRNPM|NCL|RPL10A|SNU13|YBX1|PNN|POLR2E|PRKCD|PSMB7|PSMC4|PTBP1|RAN|RPL22|RPL38|RPL39|RPS5|RPS15|RPS15A|RPS27A|RPS29|SRSF6|SKIC2|SNRPA1|SNRPD1|SNRPD3|TPR|AAAS|PABPN1|RAE1|PRPF3|FAM50A|RPL23|DDX23|SKIC3|ZC3H11A|ALYREF|SRRM1|BCAS2|EMG1|NOP56|RPP30|PRPF8|TBL3|TCERG1|SF3A3|EBNA1BP2|NUDT21|XRN2|DNAJC8|WDR43…	-21
Reactome Gene Sets	6	R-HSA-8953854	IM-LGD-L	Metabolism of RNA	-23	3.5	12	30286	726	1012	84	8.3	0.87	1207|1656|1665|1973|2197|2962|2963|3028|3184|3185|3187|3188|3312|4236|4691|4809|4927|5356|5411|5434|5687|5692|5696|5699|5710|5721|5725|5901|6146|6231|6431|6432|6499|6628|6636|6829|6832|7919|8480|8683|9128|9295|9652|9775|9785|9877|9939|10128|10250|10286|10523|10607|10762|10915|10946|10992|11051|11157|11338|22826|23398|23450|23524|27339|28960|51013|51504|51691|51692|51747|55505|55759|57819|58517|79…	CLNS1A|DDX6|DHX15|EIF4A1|FAU|GTF2F1|GTF2F2|HSD17B10|HNRNPD|HNRNPF|HNRNPH1|HNRNPH2|HSPA8|MFAP1|NCL|SNU13|NUP88|PLRG1|PNN|POLR2E|PSMA6|PSMB4|PSMB8|PSMB10|PSMD4|PSME2|PTBP1|RAN|RPL22|RPS26|SRSF6|SRSF7|SKIC2|SNRPB|SNRPF|SUPT5H|SUPV3L1|DDX39B|RAE1|SRSF9|PRPF4|SRSF11|SKIC3|EIF4A3|DHX38|ZC3H11A|RBM8A|LRPPRC|SRRM1|BCAS2|CHERP|TBL3|NUP50|TCERG1|SF3A3|SF3B2|NUDT21|LSM6|U2AF2|DNAJC8|PPWD1|SF3B3|SRRM2|PRPF19…	-21
Reactome Gene Sets	6	R-HSA-8957322	IM-LGD-L	Metabolism of steroids	-3.6	2.9	4.4	30286	155	1012	15	1.5	0.38	31|706|2230|2638|4598|5641|5901|7329|9871|10484|10498|10802|51144|51170|80765	ACACA|TSPO|FDX1|GC|MVK|LGMN|RAN|UBE2I|SEC24D|SEC23A|CARM1|SEC24A|HSD17B12|HSD17B11|STARD5	-3
Reactome Gene Sets	6	R-HSA-8957322	GC-NL	Metabolism of steroids	-2	2.2	2.8	30286	155	1076	12	1.1	0.32	39|706|1646|2230|3422|4598|5901|7329|8644|10484|10498|80765	ACAT2|TSPO|AKR1C2|FDX1|IDI1|MVK|RAN|UBE2I|AKR1C3|SEC23A|CARM1|STARD5	-1.3
Reactome Gene Sets	6	R-HSA-196854	GASTRITIS	Metabolism of vitamins and cofactors	-7.9	4.4	7.6	30286	198	724	21	2.9	0.62	48|344|952|1727|3320|4907|5095|6697|7276|10135|10797|23475|51004|51805|56922|56997|57017|64087|79934|84274|128240	ACO1|APOC2|CD38|CYB5R3|HSP90AA1|NT5E|PCCA|SPR|TTR|NAMPT|MTHFD2|QPRT|COQ6|COQ3|MCCC1|COQ8A|COQ9|MCCC2|COQ8B|COQ5|NAXE	-6.6
Reactome Gene Sets	6	R-HSA-196854	GC-NL	Metabolism of vitamins and cofactors	-8	3.7	7.3	30286	198	1076	26	2.4	0.47	48|338|344|345|348|683|686|1727|2694|4594|5091|5095|5805|8644|10797|51004|51805|56922|56997|57016|57017|60386|64087|84274|128240|326625	ACO1|APOB|APOC2|APOC3|APOE|BST1|BTD|CYB5R3|CBLIF|MMUT|PC|PCCA|PTS|AKR1C3|MTHFD2|COQ6|COQ3|MCCC1|COQ8A|AKR1B10|COQ9|SLC25A19|MCCC2|COQ5|NAXE|MMAB	-6.2
Reactome Gene Sets	6	R-HSA-196854	GC-L	Metabolism of vitamins and cofactors	-4.1	4.6	5.3	30286	198	336	10	3	0.93	348|1727|4337|4907|5095|10135|51109|51805|56997|128240	APOE|CYB5R3|MOCS1|NT5E|PCCA|NAMPT|RDH11|COQ3|COQ8A|NAXE	-3.3
Reactome Gene Sets	6	R-HSA-196854	IM-LGD-NL	Metabolism of vitamins and cofactors	-4.1	4.6	5.3	30286	198	333	10	3	0.94	31|48|348|1727|5095|5948|10797|23475|56922|57017	ACACA|ACO1|APOE|CYB5R3|PCCA|RBP2|MTHFD2|QPRT|MCCC1|COQ9	-2.9
Reactome Gene Sets	6	R-HSA-196854	IM-LGD-L	Metabolism of vitamins and cofactors	-14	5.1	11	30286	198	1012	34	3.4	0.57	31|48|143|335|336|337|338|344|345|348|1727|2694|3320|4594|5091|5095|5805|5948|5950|6697|23475|27010|51004|51109|51805|56922|56997|57017|60386|64087|79934|84274|128240|326625	ACACA|ACO1|PARP4|APOA1|APOA2|APOA4|APOB|APOC2|APOC3|APOE|CYB5R3|CBLIF|HSP90AA1|MMUT|PC|PCCA|PTS|RBP2|RBP4|SPR|QPRT|TPK1|COQ6|RDH11|COQ3|MCCC1|COQ8A|COQ9|SLC25A19|MCCC2|COQ8B|COQ5|NAXE|MMAB	-13
Reactome Gene Sets	6	R-HSA-196854	EGC-L	Metabolism of vitamins and cofactors	-14	4.5	10	30286	198	1217	36	3	0.49	31|48|54|335|337|338|344|345|348|683|686|1727|2350|2694|3320|4522|4594|4907|5091|5095|5646|5805|6472|10135|10797|23475|51109|51805|56922|56997|57017|60386|64087|84274|128240|326625	ACACA|ACO1|ACP5|APOA1|APOA4|APOB|APOC2|APOC3|APOE|BST1|BTD|CYB5R3|FOLR2|CBLIF|HSP90AA1|MTHFD1|MMUT|NT5E|PC|PCCA|PRSS3|PTS|SHMT2|NAMPT|MTHFD2|QPRT|RDH11|COQ3|MCCC1|COQ8A|COQ9|SLC25A19|MCCC2|COQ5|NAXE|MMAB	-12
Reactome Gene Sets	6	R-HSA-196849	EGC-L	Metabolism of water-soluble vitamins and cofactors	-8.1	4.3	7.7	30286	127	1217	22	1.8	0.38	31|54|683|686|1727|2350|2694|4522|4594|4907|5091|5095|5646|6472|10135|10797|23475|56922|60386|64087|128240|326625	ACACA|ACP5|BST1|BTD|CYB5R3|FOLR2|CBLIF|MTHFD1|MMUT|NT5E|PC|PCCA|PRSS3|SHMT2|NAMPT|MTHFD2|QPRT|MCCC1|SLC25A19|MCCC2|NAXE|MMAB	-6.9
Reactome Gene Sets	6	R-HSA-196849	GASTRITIS	Metabolism of water-soluble vitamins and cofactors	-3	3.3	4.1	30286	127	724	10	1.4	0.43	952|1727|4907|5095|10135|10797|23475|56922|64087|128240	CD38|CYB5R3|NT5E|PCCA|NAMPT|MTHFD2|QPRT|MCCC1|MCCC2|NAXE	-2.5
Reactome Gene Sets	6	R-HSA-196849	IM-LGD-L	Metabolism of water-soluble vitamins and cofactors	-4	3.3	4.8	30286	127	1012	14	1.4	0.37	31|143|1727|2694|4594|5091|5095|23475|27010|56922|60386|64087|128240|326625	ACACA|PARP4|CYB5R3|CBLIF|MMUT|PC|PCCA|QPRT|TPK1|MCCC1|SLC25A19|MCCC2|NAXE|MMAB	-3.3
Reactome Gene Sets	6	R-HSA-196849	GC-L	Metabolism of water-soluble vitamins and cofactors	-2.5	4.3	3.9	30286	127	336	6	1.8	0.72	1727|4337|4907|5095|10135|128240	CYB5R3|MOCS1|NT5E|PCCA|NAMPT|NAXE	-2.1
Reactome Gene Sets	6	R-HSA-196849	GC-NL	Metabolism of water-soluble vitamins and cofactors	-3.2	2.9	4.1	30286	127	1076	13	1.2	0.33	683|686|1727|2694|4594|5091|5095|10797|56922|60386|64087|128240|326625	BST1|BTD|CYB5R3|CBLIF|MMUT|PC|PCCA|MTHFD2|MCCC1|SLC25A19|MCCC2|NAXE|MMAB	-2.2
Reactome Gene Sets	6	R-HSA-196849	IM-LGD-NL	Metabolism of water-soluble vitamins and cofactors	-2.5	4.3	3.9	30286	127	333	6	1.8	0.73	31|1727|5095|10797|23475|56922	ACACA|CYB5R3|PCCA|MTHFD2|QPRT|MCCC1	-1.7
Reactome Gene Sets	6	R-HSA-6799990	GC-NL	Metal sequestration by antimicrobial proteins	-3.1	14	6.1	30286	6	1076	3	0.28	0.16	4057|6279|6280	LTF|S100A8|S100A9	-2.1
Reactome Gene Sets	6	R-HSA-6799990	EGC-L	Metal sequestration by antimicrobial proteins	-2.9	12	5.7	30286	6	1217	3	0.25	0.14	4057|6279|6280	LTF|S100A8|S100A9	-2.4
Reactome Gene Sets	6	R-HSA-156581	IM-LGD-L	Methylation	-3	8.6	5.3	30286	14	1012	4	0.4	0.2	1312|4144|7172|51504	COMT|MAT2A|TPMT|TRMT112	-2.5
Reactome Gene Sets	6	R-HSA-2132295	GASTRITIS	MHC class II antigen presentation	-5.8	4.8	6.5	30286	123	724	14	1.9	0.51	829|1075|1174|1508|1512|1514|3115|3122|3123|5641|6456|10053|10484|84617	CAPZA1|CTSC|AP1S1|CTSB|CTSH|CTSL|HLA-DPB1|HLA-DRA|HLA-DRB1|LGMN|SH3GL2|AP1M2|SEC23A|TUBB6	-4.8
Reactome Gene Sets	6	R-HSA-2132295	GC-NL	MHC class II antigen presentation	-6.4	4.1	6.7	30286	123	1076	18	1.7	0.39	164|1075|1173|1174|1213|1508|1510|1514|1783|3115|3122|3127|10053|10120|10121|10484|55860|84617	AP1G1|CTSC|AP2M1|AP1S1|CLTC|CTSB|CTSE|CTSL|DYNC1LI2|HLA-DPB1|HLA-DRA|HLA-DRB5|AP1M2|ACTR1B|ACTR1A|SEC23A|ACTR10|TUBB6	-4.9
Reactome Gene Sets	6	R-HSA-2132295	EGC-L	MHC class II antigen presentation	-6.3	3.8	6.5	30286	123	1217	19	1.6	0.36	164|829|1075|1173|1174|1508|1510|1512|1514|1783|3122|3123|10053|10120|10121|10382|55860|81027|84617	AP1G1|CAPZA1|CTSC|AP2M1|AP1S1|CTSB|CTSE|CTSH|CTSL|DYNC1LI2|HLA-DRA|HLA-DRB1|AP1M2|ACTR1B|ACTR1A|TUBB4A|ACTR10|TUBB1|TUBB6	-5.3
Reactome Gene Sets	6	R-HSA-2132295	GC-L	MHC class II antigen presentation	-4.1	5.9	5.7	30286	123	336	8	2.4	0.83	1075|1174|1508|3115|3122|5641|6456|10053	CTSC|AP1S1|CTSB|HLA-DPB1|HLA-DRA|LGMN|SH3GL2|AP1M2	-3.4
Reactome Gene Sets	6	R-HSA-2132295	IM-LGD-NL	MHC class II antigen presentation	-4.2	5.9	5.8	30286	123	333	8	2.4	0.84	1075|1174|1508|3115|3122|10053|10484|81027	CTSC|AP1S1|CTSB|HLA-DPB1|HLA-DRA|AP1M2|SEC23A|TUBB1	-2.9
Reactome Gene Sets	6	R-HSA-2132295	EGC-NL	MHC class II antigen presentation	-2.8	8.2	5.1	30286	123	120	4	3.3	1.6	1174|1510|3115|3122	AP1S1|CTSE|HLA-DPB1|HLA-DRA	-1.9
Reactome Gene Sets	6	R-HSA-2132295	IM-LGD-L	MHC class II antigen presentation	-2.5	2.7	3.5	30286	123	1012	11	1.1	0.33	164|1075|1174|1508|3115|3122|5641|9871|10484|10802|64837	AP1G1|CTSC|AP1S1|CTSB|HLA-DPB1|HLA-DRA|LGMN|SEC24D|SEC23A|SEC24A|KLC2	-2.1
Reactome Gene Sets	6	R-HSA-5358508	EGC-L	Mismatch Repair	-3.7	8.3	5.8	30286	15	1217	5	0.41	0.18	5111|5424|5425|6117|6119	PCNA|POLD1|POLD2|RPA1|RPA3	-3
Reactome Gene Sets	6	R-HSA-5358508	GASTRITIS	Mismatch Repair	-2.3	8.4	4.5	30286	15	724	3	0.41	0.24	5111|5424|6117	PCNA|POLD1|RPA1	-1.9
Reactome Gene Sets	6	R-HSA-5358508	IM-LGD-L	Mismatch Repair	-2.9	8	5	30286	15	1012	4	0.4	0.2	5111|5424|5425|6118	PCNA|POLD1|POLD2|RPA2	-2.4
Reactome Gene Sets	6	R-HSA-5358606	GASTRITIS	Mismatch repair (MMR) directed by MSH2:MSH3 (MutSbeta)	-2.4	9	4.7	30286	14	724	3	0.41	0.24	5111|5424|6117	PCNA|POLD1|RPA1	-2
Reactome Gene Sets	6	R-HSA-5358606	IM-LGD-L	Mismatch repair (MMR) directed by MSH2:MSH3 (MutSbeta)	-3	8.6	5.3	30286	14	1012	4	0.4	0.2	5111|5424|5425|6118	PCNA|POLD1|POLD2|RPA2	-2.5
Reactome Gene Sets	6	R-HSA-5358606	EGC-L	Mismatch repair (MMR) directed by MSH2:MSH3 (MutSbeta)	-3.8	8.9	6	30286	14	1217	5	0.41	0.18	5111|5424|5425|6117|6119	PCNA|POLD1|POLD2|RPA1|RPA3	-3.1
Reactome Gene Sets	6	R-HSA-5358565	GASTRITIS	Mismatch repair (MMR) directed by MSH2:MSH6 (MutSalpha)	-2.4	9	4.7	30286	14	724	3	0.41	0.24	5111|5424|6117	PCNA|POLD1|RPA1	-2
Reactome Gene Sets	6	R-HSA-5358565	IM-LGD-L	Mismatch repair (MMR) directed by MSH2:MSH6 (MutSalpha)	-3	8.6	5.3	30286	14	1012	4	0.4	0.2	5111|5424|5425|6118	PCNA|POLD1|POLD2|RPA2	-2.5
Reactome Gene Sets	6	R-HSA-5358565	EGC-L	Mismatch repair (MMR) directed by MSH2:MSH6 (MutSalpha)	-3.8	8.9	6	30286	14	1217	5	0.41	0.18	5111|5424|5425|6117|6119	PCNA|POLD1|POLD2|RPA1|RPA3	-3.1
Reactome Gene Sets	6	R-HSA-1592230	EGC-L	Mitochondrial biogenesis	-11	5.8	9.5	30286	95	1217	22	1.8	0.38	506|513|514|515|521|522|539|2746|3054|3418|4509|8834|10498|10632|10651|10989|25813|54927|55902|79718|84303|139322	ATP5F1B|ATP5F1D|ATP5F1E|ATP5PB|ATP5ME|ATP5PF|ATP5PO|GLUD1|HCFC1|IDH2|ATP8|TMEM11|CARM1|ATP5MG|MTX2|IMMT|SAMM50|CHCHD3|ACSS2|TBL1XR1|CHCHD6|APOOL	-9.2
Reactome Gene Sets	6	R-HSA-1592230	GC-L	Mitochondrial biogenesis	-2.4	4.7	3.9	30286	95	336	5	1.5	0.66	515|4509|8834|25813|139322	ATP5PB|ATP8|TMEM11|SAMM50|APOOL	-2
Reactome Gene Sets	6	R-HSA-1592230	GASTRITIS	Mitochondrial biogenesis	-11	7.9	11	30286	95	724	18	2.5	0.58	506|513|514|515|522|539|2746|3054|3418|4509|7019|10632|10651|10989|25813|27109|84303|139322	ATP5F1B|ATP5F1D|ATP5F1E|ATP5PB|ATP5PF|ATP5PO|GLUD1|HCFC1|IDH2|ATP8|TFAM|ATP5MG|MTX2|IMMT|SAMM50|DMAC2L|CHCHD6|APOOL	-9.5
Reactome Gene Sets	6	R-HSA-1592230	IM-LGD-L	Mitochondrial biogenesis	-14	7.6	12	30286	95	1012	24	2.4	0.48	506|513|514|515|521|522|539|3054|3313|3418|4509|4580|7019|8834|10498|10632|10651|10989|25813|27109|54927|84303|125988|139322	ATP5F1B|ATP5F1D|ATP5F1E|ATP5PB|ATP5ME|ATP5PF|ATP5PO|HCFC1|HSPA9|IDH2|ATP8|MTX1|TFAM|TMEM11|CARM1|ATP5MG|MTX2|IMMT|SAMM50|DMAC2L|CHCHD3|CHCHD6|MICOS13|APOOL	-13
Reactome Gene Sets	6	R-HSA-1592230	GC-NL	Mitochondrial biogenesis	-14	7.1	11	30286	95	1076	24	2.2	0.45	506|513|514|515|521|522|539|2746|3054|3418|4509|6742|8834|10498|10632|10651|10989|25813|27109|54927|55902|84303|125988|139322	ATP5F1B|ATP5F1D|ATP5F1E|ATP5PB|ATP5ME|ATP5PF|ATP5PO|GLUD1|HCFC1|IDH2|ATP8|SSBP1|TMEM11|CARM1|ATP5MG|MTX2|IMMT|SAMM50|DMAC2L|CHCHD3|ACSS2|CHCHD6|MICOS13|APOOL	-12
Reactome Gene Sets	6	R-HSA-8949215	GASTRITIS	Mitochondrial calcium ion transport	-4.9	11	7.4	30286	23	724	6	0.83	0.34	3954|7416|7417|10939|30968|79568	LETM1|VDAC1|VDAC2|AFG3L2|STOML2|MAIP1	-4
Reactome Gene Sets	6	R-HSA-8949215	IM-LGD-L	Mitochondrial calcium ion transport	-4.1	7.8	6.1	30286	23	1012	6	0.59	0.24	3954|6687|7416|7417|10939|79568	LETM1|SPG7|VDAC1|VDAC2|AFG3L2|MAIP1	-3.3
Reactome Gene Sets	6	R-HSA-8949215	EGC-L	Mitochondrial calcium ion transport	-3.6	6.5	5.4	30286	23	1217	6	0.49	0.2	3954|6687|7416|7417|10939|79568	LETM1|SPG7|VDAC1|VDAC2|AFG3L2|MAIP1	-3
Reactome Gene Sets	6	R-HSA-8949215	GC-L	Mitochondrial calcium ion transport	-6.8	24	11	30286	23	336	6	1.8	0.72	3954|6687|7416|7417|10939|79568	LETM1|SPG7|VDAC1|VDAC2|AFG3L2|MAIP1	-5.7
Reactome Gene Sets	6	R-HSA-8949215	GC-NL	Mitochondrial calcium ion transport	-5	8.6	7	30286	23	1076	7	0.65	0.25	3954|6687|7416|7417|10939|30968|79568	LETM1|SPG7|VDAC1|VDAC2|AFG3L2|STOML2|MAIP1	-3.6
Reactome Gene Sets	6	R-HSA-77289	GASTRITIS	Mitochondrial Fatty Acid Beta-Oxidation	-6.8	10	8.7	30286	37	724	9	1.2	0.41	35|1666|3030|3032|5095|27349|55856|80221|84693	ACADS|DECR1|HADHA|HADHB|PCCA|MCAT|ACOT13|ACSF2|MCEE	-5.7
Reactome Gene Sets	6	R-HSA-77289	IM-LGD-L	Mitochondrial Fatty Acid Beta-Oxidation	-7.7	8.9	8.9	30286	37	1012	11	1.1	0.33	34|35|1666|1892|3030|3032|4594|5095|27349|55856|84693	ACADM|ACADS|DECR1|ECHS1|HADHA|HADHB|MMUT|PCCA|MCAT|ACOT13|MCEE	-6.5
Reactome Gene Sets	6	R-HSA-77289	GC-NL	Mitochondrial Fatty Acid Beta-Oxidation	-7.4	8.4	8.6	30286	37	1076	11	1	0.31	34|35|1666|1892|3030|3032|4594|5095|55856|80221|84693	ACADM|ACADS|DECR1|ECHS1|HADHA|HADHB|MMUT|PCCA|ACOT13|ACSF2|MCEE	-5.7
Reactome Gene Sets	6	R-HSA-77289	GC-L	Mitochondrial Fatty Acid Beta-Oxidation	-2.1	7.3	4.1	30286	37	336	3	0.89	0.51	5095|55856|84693	PCCA|ACOT13|MCEE	-1.8
Reactome Gene Sets	6	R-HSA-77289	EGC-L	Mitochondrial Fatty Acid Beta-Oxidation	-6.9	7.4	8	30286	37	1217	11	0.9	0.27	34|35|1666|1892|3030|3032|4594|5095|55856|80221|84693	ACADM|ACADS|DECR1|ECHS1|HADHA|HADHB|MMUT|PCCA|ACOT13|ACSF2|MCEE	-5.7
Reactome Gene Sets	6	R-HSA-77286	IM-LGD-L	mitochondrial fatty acid beta-oxidation of saturated fatty acids	-4.8	14	7.8	30286	11	1012	5	0.49	0.22	34|35|1892|3030|3032	ACADM|ACADS|ECHS1|HADHA|HADHB	-3.9
Reactome Gene Sets	6	R-HSA-77286	GC-NL	mitochondrial fatty acid beta-oxidation of saturated fatty acids	-4.7	13	7.5	30286	11	1076	5	0.46	0.21	34|35|1892|3030|3032	ACADM|ACADS|ECHS1|HADHA|HADHB	-3.3
Reactome Gene Sets	6	R-HSA-77286	GASTRITIS	mitochondrial fatty acid beta-oxidation of saturated fatty acids	-2.7	11	5.4	30286	11	724	3	0.41	0.24	35|3030|3032	ACADS|HADHA|HADHB	-2.2
Reactome Gene Sets	6	R-HSA-77286	EGC-L	mitochondrial fatty acid beta-oxidation of saturated fatty acids	-4.4	11	7	30286	11	1217	5	0.41	0.18	34|35|1892|3030|3032	ACADM|ACADS|ECHS1|HADHA|HADHB	-3.6
Reactome Gene Sets	6	R-HSA-77288	IM-LGD-L	mitochondrial fatty acid beta-oxidation of unsaturated fatty acids	-4.8	20	8.6	30286	6	1012	4	0.4	0.2	34|1666|3030|3032	ACADM|DECR1|HADHA|HADHB	-3.9
Reactome Gene Sets	6	R-HSA-77288	GC-NL	mitochondrial fatty acid beta-oxidation of unsaturated fatty acids	-4.6	19	8.4	30286	6	1076	4	0.37	0.19	34|1666|3030|3032	ACADM|DECR1|HADHA|HADHB	-3.3
Reactome Gene Sets	6	R-HSA-77288	GASTRITIS	mitochondrial fatty acid beta-oxidation of unsaturated fatty acids	-3.6	21	7.6	30286	6	724	3	0.41	0.24	1666|3030|3032	DECR1|HADHA|HADHB	-2.9
Reactome Gene Sets	6	R-HSA-77288	EGC-L	mitochondrial fatty acid beta-oxidation of unsaturated fatty acids	-4.4	17	7.8	30286	6	1217	4	0.33	0.16	34|1666|3030|3032	ACADM|DECR1|HADHA|HADHB	-3.6
Reactome Gene Sets	6	R-HSA-1362409	GC-NL	Mitochondrial iron-sulfur cluster biogenesis	-4.2	11	6.8	30286	13	1076	5	0.46	0.21	2230|51218|57128|122961|150274	FDX1|GLRX5|LYRM4|ISCA2|HSCB	-3
Reactome Gene Sets	6	R-HSA-1362409	IM-LGD-L	Mitochondrial iron-sulfur cluster biogenesis	-3.2	9.2	5.5	30286	13	1012	4	0.4	0.2	2230|51218|122961|150274	FDX1|GLRX5|ISCA2|HSCB	-2.6
Reactome Gene Sets	6	R-HSA-9837999	GASTRITIS	Mitochondrial protein degradation	-31	15	22	30286	98	724	35	4.8	0.8	36|38|50|217|292|506|522|539|622|1327|1329|1431|1629|2271|2746|3028|3418|4191|4513|4722|4723|4976|5019|5162|7019|7385|8801|9361|9377|10632|10939|27034|27089|51499|197257	ACADSB|ACAT1|ACO2|ALDH2|SLC25A5|ATP5F1B|ATP5PF|ATP5PO|BDH1|COX4I1|COX5B|CS|DBT|FH|GLUD1|HSD17B10|IDH2|MDH2|COX2|NDUFS3|NDUFV1|OPA1|OXCT1|PDHB|TFAM|UQCRC2|SUCLG2|LONP1|COX5A|ATP5MG|AFG3L2|ACAD8|UQCRQ|TRIAP1|LDHD	-29
Reactome Gene Sets	6	R-HSA-9837999	GC-L	Mitochondrial protein degradation	-10	12	12	30286	98	336	13	3.9	1.1	292|293|622|1327|3028|4513|4712|4722|6687|9361|10939|27034|27089	SLC25A5|SLC25A6|BDH1|COX4I1|HSD17B10|COX2|NDUFB6|NDUFS3|SPG7|LONP1|AFG3L2|ACAD8|UQCRQ	-8.7
Reactome Gene Sets	6	R-HSA-9837999	IM-LGD-NL	Mitochondrial protein degradation	-14	15	14	30286	98	333	16	4.8	1.2	292|622|1327|1629|2746|3028|4200|4513|4722|4723|4731|7019|7385|9377|27034|27089	SLC25A5|BDH1|COX4I1|DBT|GLUD1|HSD17B10|ME2|COX2|NDUFS3|NDUFV1|NDUFV3|TFAM|UQCRC2|COX5A|ACAD8|UQCRQ	-12
Reactome Gene Sets	6	R-HSA-9837999	IM-LGD-L	Mitochondrial protein degradation	-34	13	21	30286	98	1012	41	4.1	0.62	36|38|50|219|292|293|506|522|539|622|1327|1329|1431|1629|1891|2235|2271|3028|3313|3329|3418|4191|4513|4695|4712|4722|4723|5019|6687|7019|7385|8801|9361|9377|10632|10939|26519|27034|27089|55699|197257	ACADSB|ACAT1|ACO2|ALDH1B1|SLC25A5|SLC25A6|ATP5F1B|ATP5PF|ATP5PO|BDH1|COX4I1|COX5B|CS|DBT|ECH1|FECH|FH|HSD17B10|HSPA9|HSPD1|IDH2|MDH2|COX2|NDUFA2|NDUFB6|NDUFS3|NDUFV1|OXCT1|SPG7|TFAM|UQCRC2|SUCLG2|LONP1|COX5A|ATP5MG|AFG3L2|TIMM10|ACAD8|UQCRQ|IARS2|LDHD	-32
Reactome Gene Sets	6	R-HSA-9837999	GC-NL	Mitochondrial protein degradation	-34	12	21	30286	98	1076	42	3.9	0.59	36|38|50|292|293|506|522|539|622|1327|1329|1431|1629|1891|2271|2746|3028|3418|3419|4191|4200|4513|4695|4722|4723|4976|5019|5162|6687|6742|7385|8801|9361|9377|10632|10939|26519|27034|27089|51499|55699|197257	ACADSB|ACAT1|ACO2|SLC25A5|SLC25A6|ATP5F1B|ATP5PF|ATP5PO|BDH1|COX4I1|COX5B|CS|DBT|ECH1|FH|GLUD1|HSD17B10|IDH2|IDH3A|MDH2|ME2|COX2|NDUFA2|NDUFS3|NDUFV1|OPA1|OXCT1|PDHB|SPG7|SSBP1|UQCRC2|SUCLG2|LONP1|COX5A|ATP5MG|AFG3L2|TIMM10|ACAD8|UQCRQ|TRIAP1|IARS2|LDHD	-31
Reactome Gene Sets	6	R-HSA-9837999	EGC-L	Mitochondrial protein degradation	-26	9.4	17	30286	98	1217	37	3	0.49	36|38|50|292|293|506|522|539|1327|1329|1431|1629|2271|2746|3028|3418|4200|4513|4695|4712|4722|4723|4731|4976|5019|5162|6472|6687|7385|8801|9361|9377|10632|10939|27034|27089|197257	ACADSB|ACAT1|ACO2|SLC25A5|SLC25A6|ATP5F1B|ATP5PF|ATP5PO|COX4I1|COX5B|CS|DBT|FH|GLUD1|HSD17B10|IDH2|ME2|COX2|NDUFA2|NDUFB6|NDUFS3|NDUFV1|NDUFV3|OPA1|OXCT1|PDHB|SHMT2|SPG7|UQCRC2|SUCLG2|LONP1|COX5A|ATP5MG|AFG3L2|ACAD8|UQCRQ|LDHD	-24
Reactome Gene Sets	6	R-HSA-1268020	EGC-L	Mitochondrial protein import	-9.3	6.5	9.1	30286	65	1217	17	1.4	0.34	50|291|293|506|1431|1537|2671|4714|7416|10063|10651|25813|54927|56942|79145|197257|100272147	ACO2|SLC25A4|SLC25A6|ATP5F1B|CS|CYC1|GFER|NDUFB8|VDAC1|COX17|MTX2|SAMM50|CHCHD3|CMC2|CHCHD7|LDHD|CMC4	-7.9
Reactome Gene Sets	6	R-HSA-1268020	GC-L	Mitochondrial protein import	-3.1	6.9	5.1	30286	65	336	5	1.5	0.66	293|1537|4714|7416|25813	SLC25A6|CYC1|NDUFB8|VDAC1|SAMM50	-2.5
Reactome Gene Sets	6	R-HSA-1268020	GASTRITIS	Mitochondrial protein import	-13	11	13	30286	65	724	17	2.3	0.56	50|506|1431|1537|1678|4714|7416|10063|10651|25813|26517|26521|56942|79145|92609|197257|100272147	ACO2|ATP5F1B|CS|CYC1|TIMM8A|NDUFB8|VDAC1|COX17|MTX2|SAMM50|TIMM13|TIMM8B|CMC2|CHCHD7|TIMM50|LDHD|CMC4	-11
Reactome Gene Sets	6	R-HSA-1268020	IM-LGD-NL	Mitochondrial protein import	-2.2	5.6	3.9	30286	65	333	4	1.2	0.6	4714|7416|10063|79145	NDUFB8|VDAC1|COX17|CHCHD7	-1.5
Reactome Gene Sets	6	R-HSA-1268020	IM-LGD-L	Mitochondrial protein import	-26	14	19	30286	65	1012	30	3	0.53	50|291|293|506|617|1431|1537|1678|2671|3313|3329|4580|4714|5009|7416|9868|10063|10469|10651|25813|26515|26519|54927|56942|56993|79145|84269|150274|197257|100272147	ACO2|SLC25A4|SLC25A6|ATP5F1B|BCS1L|CS|CYC1|TIMM8A|GFER|HSPA9|HSPD1|MTX1|NDUFB8|OTC|VDAC1|TOMM70|COX17|TIMM44|MTX2|SAMM50|TIMM10B|TIMM10|CHCHD3|CMC2|TOMM22|CHCHD7|CHCHD5|HSCB|LDHD|CMC4	-24
Reactome Gene Sets	6	R-HSA-1268020	GC-NL	Mitochondrial protein import	-19	11	15	30286	65	1076	25	2.3	0.46	50|291|293|506|1431|1537|1678|2671|4714|7416|10063|10651|25813|26515|26517|26519|26521|54927|56942|56993|79145|84269|150274|197257|100272147	ACO2|SLC25A4|SLC25A6|ATP5F1B|CS|CYC1|TIMM8A|GFER|NDUFB8|VDAC1|COX17|MTX2|SAMM50|TIMM10B|TIMM13|TIMM10|TIMM8B|CHCHD3|CMC2|TOMM22|CHCHD7|CHCHD5|HSCB|LDHD|CMC4	-17
Reactome Gene Sets	6	R-HSA-5368287	GASTRITIS	Mitochondrial translation	-9.2	7.2	9.4	30286	93	724	16	2.2	0.55	740|6150|10240|51081|51373|54460|54948|55168|64975|65008|65080|65993|90480|92259|128308|219927	MRPL49|MRPL23|MRPS31|MRPS7|MRPS17|MRPS21|MRPL16|MRPS18A|MRPL41|MRPL1|MRPL44|MRPS34|GADD45GIP1|KGD4|MRPL55|MRPL21	-7.8
Reactome Gene Sets	6	R-HSA-5368287	IM-LGD-L	Mitochondrial translation	-6.4	4.8	6.9	30286	93	1012	15	1.5	0.38	7284|10240|11222|23107|51258|51373|51642|51650|54460|54948|55168|65993|79590|92259|219402	TUFM|MRPS31|MRPL3|MRPS27|MRPL51|MRPS17|MRPL48|MRPS33|MRPS21|MRPL16|MRPS18A|MRPS34|MRPL24|KGD4|MTIF3	-5.3
Reactome Gene Sets	6	R-HSA-5368287	GC-NL	Mitochondrial translation	-4.6	3.9	5.4	30286	93	1076	13	1.2	0.33	740|6150|7284|9553|11222|51373|54460|54948|55168|92259|128308|219402|219927	MRPL49|MRPL23|TUFM|MRPL33|MRPL3|MRPS17|MRPS21|MRPL16|MRPS18A|KGD4|MRPL55|MTIF3|MRPL21	-3.3
Reactome Gene Sets	6	R-HSA-5389840	GASTRITIS	Mitochondrial translation elongation	-9.6	7.7	9.8	30286	87	724	16	2.2	0.55	740|6150|10240|51081|51373|54460|54948|55168|64975|65008|65080|65993|90480|92259|128308|219927	MRPL49|MRPL23|MRPS31|MRPS7|MRPS17|MRPS21|MRPL16|MRPS18A|MRPL41|MRPL1|MRPL44|MRPS34|GADD45GIP1|KGD4|MRPL55|MRPL21	-8.2
Reactome Gene Sets	6	R-HSA-5389840	IM-LGD-L	Mitochondrial translation elongation	-6	4.8	6.6	30286	87	1012	14	1.4	0.37	7284|10240|11222|23107|51258|51373|51642|51650|54460|54948|55168|65993|79590|92259	TUFM|MRPS31|MRPL3|MRPS27|MRPL51|MRPS17|MRPL48|MRPS33|MRPS21|MRPL16|MRPS18A|MRPS34|MRPL24|KGD4	-4.9
Reactome Gene Sets	6	R-HSA-5389840	GC-NL	Mitochondrial translation elongation	-4.2	3.9	5.2	30286	87	1076	12	1.1	0.32	740|6150|7284|9553|11222|51373|54460|54948|55168|92259|128308|219927	MRPL49|MRPL23|TUFM|MRPL33|MRPL3|MRPS17|MRPS21|MRPL16|MRPS18A|KGD4|MRPL55|MRPL21	-3
Reactome Gene Sets	6	R-HSA-5368286	GASTRITIS	Mitochondrial translation initiation	-9.6	7.7	9.8	30286	87	724	16	2.2	0.55	740|6150|10240|51081|51373|54460|54948|55168|64975|65008|65080|65993|90480|92259|128308|219927	MRPL49|MRPL23|MRPS31|MRPS7|MRPS17|MRPS21|MRPL16|MRPS18A|MRPL41|MRPL1|MRPL44|MRPS34|GADD45GIP1|KGD4|MRPL55|MRPL21	-8.2
Reactome Gene Sets	6	R-HSA-5368286	IM-LGD-L	Mitochondrial translation initiation	-6	4.8	6.6	30286	87	1012	14	1.4	0.37	10240|11222|23107|51258|51373|51642|51650|54460|54948|55168|65993|79590|92259|219402	MRPS31|MRPL3|MRPS27|MRPL51|MRPS17|MRPL48|MRPS33|MRPS21|MRPL16|MRPS18A|MRPS34|MRPL24|KGD4|MTIF3	-4.9
Reactome Gene Sets	6	R-HSA-5368286	GC-NL	Mitochondrial translation initiation	-4.2	3.9	5.2	30286	87	1076	12	1.1	0.32	740|6150|9553|11222|51373|54460|54948|55168|92259|128308|219402|219927	MRPL49|MRPL23|MRPL33|MRPL3|MRPS17|MRPS21|MRPL16|MRPS18A|KGD4|MRPL55|MTIF3|MRPL21	-3
Reactome Gene Sets	6	R-HSA-5419276	GASTRITIS	Mitochondrial translation termination	-9.6	7.7	9.8	30286	87	724	16	2.2	0.55	740|6150|10240|51081|51373|54460|54948|55168|64975|65008|65080|65993|90480|92259|128308|219927	MRPL49|MRPL23|MRPS31|MRPS7|MRPS17|MRPS21|MRPL16|MRPS18A|MRPL41|MRPL1|MRPL44|MRPS34|GADD45GIP1|KGD4|MRPL55|MRPL21	-8.2
Reactome Gene Sets	6	R-HSA-5419276	GC-NL	Mitochondrial translation termination	-3.6	3.6	4.6	30286	87	1076	11	1	0.31	740|6150|9553|11222|51373|54460|54948|55168|92259|128308|219927	MRPL49|MRPL23|MRPL33|MRPL3|MRPS17|MRPS21|MRPL16|MRPS18A|KGD4|MRPL55|MRPL21	-2.5
Reactome Gene Sets	6	R-HSA-5419276	IM-LGD-L	Mitochondrial translation termination	-5.2	4.5	6	30286	87	1012	13	1.3	0.35	10240|11222|23107|51258|51373|51642|51650|54460|54948|55168|65993|79590|92259	MRPS31|MRPL3|MRPS27|MRPL51|MRPS17|MRPL48|MRPS33|MRPS21|MRPL16|MRPS18A|MRPS34|MRPL24|KGD4	-4.3
Reactome Gene Sets	6	R-HSA-379726	GC-NL	Mitochondrial tRNA aminoacylation	-4.2	8	6.2	30286	21	1076	6	0.56	0.23	10352|23438|55157|55699|79587|92935	WARS2|HARS2|DARS2|IARS2|CARS2|MARS2	-2.9
Reactome Gene Sets	6	R-HSA-379726	IM-LGD-L	Mitochondrial tRNA aminoacylation	-3.3	7.1	5.2	30286	21	1012	5	0.49	0.22	23438|55157|55699|79587|92935	HARS2|DARS2|IARS2|CARS2|MARS2	-2.7
Reactome Gene Sets	6	R-HSA-379726	EGC-L	Mitochondrial tRNA aminoacylation	-2.9	5.9	4.6	30286	21	1217	5	0.41	0.18	10352|23438|54938|79587|92935	WARS2|HARS2|SARS2|CARS2|MARS2	-2.4
Reactome Gene Sets	6	R-HSA-379726	GASTRITIS	Mitochondrial tRNA aminoacylation	-2.9	8	5	30286	21	724	4	0.55	0.28	10352|23438|54938|92935	WARS2|HARS2|SARS2|MARS2	-2.3
Reactome Gene Sets	6	R-HSA-5205647	GC-L	Mitophagy	-2.4	9.3	4.8	30286	29	336	3	0.89	0.51	7416|8878|9927	VDAC1|SQSTM1|MFN2	-2
Reactome Gene Sets	6	R-HSA-5205647	IM-LGD-L	Mitophagy	-2.6	5.2	4.2	30286	29	1012	5	0.49	0.22	7416|8878|9868|9927|56993	VDAC1|SQSTM1|TOMM70|MFN2|TOMM22	-2.1
Reactome Gene Sets	6	R-HSA-68882	EGC-L	Mitotic Anaphase	-6.5	3	6.2	30286	235	1217	28	2.3	0.43	983|1104|1783|3837|4001|5048|5696|5699|5704|5710|5721|5901|5903|5905|7112|7329|8243|9126|10382|10726|22919|23592|53371|55920|81027|84617|128866|221496	CDK1|RCC1|DYNC1LI2|KPNB1|LMNB1|PAFAH1B1|PSMB8|PSMB10|PSMC4|PSMD4|PSME2|RAN|RANBP2|RANGAP1|TMPO|UBE2I|SMC1A|SMC3|TUBB4A|NUDC|MAPRE1|LEMD3|NUP54|RCC2|TUBB1|TUBB6|CHMP4B|LEMD2	-5.4
Reactome Gene Sets	6	R-HSA-68882	GASTRITIS	Mitotic Anaphase	-4.2	3	4.9	30286	235	724	17	2.3	0.56	983|3837|4001|5048|5694|5695|5696|5699|5721|5901|7329|9126|23592|25978|55920|84617|221496	CDK1|KPNB1|LMNB1|PAFAH1B1|PSMB6|PSMB7|PSMB8|PSMB10|PSME2|RAN|UBE2I|SMC3|LEMD3|CHMP2B|RCC2|TUBB6|LEMD2	-3.5
Reactome Gene Sets	6	R-HSA-68882	IM-LGD-L	Mitotic Anaphase	-3	2.3	3.7	30286	235	1012	18	1.8	0.42	2010|4001|5687|5692|5696|5699|5710|5721|5901|5905|7329|10726|22919|23592|29082|55920|128866|221496	EMD|LMNB1|PSMA6|PSMB4|PSMB8|PSMB10|PSMD4|PSME2|RAN|RANGAP1|UBE2I|NUDC|MAPRE1|LEMD3|CHMP4A|RCC2|CHMP4B|LEMD2	-2.5
Reactome Gene Sets	6	R-HSA-453279	GASTRITIS	Mitotic G1 phase and G1/S transition	-3.6	3.4	4.5	30286	149	724	12	1.7	0.47	983|1021|4067|4173|4175|5111|5694|5695|5696|5699|5721|6117	CDK1|CDK6|LYN|MCM4|MCM6|PCNA|PSMB6|PSMB7|PSMB8|PSMB10|PSME2|RPA1	-2.9
Reactome Gene Sets	6	R-HSA-453279	EGC-L	Mitotic G1 phase and G1/S transition	-3	2.5	3.8	30286	149	1217	15	1.2	0.32	983|4067|4171|4173|4174|4175|5111|5696|5699|5704|5710|5721|6117|6119|54107	CDK1|LYN|MCM2|MCM4|MCM5|MCM6|PCNA|PSMB8|PSMB10|PSMC4|PSMD4|PSME2|RPA1|RPA3|POLE3	-2.4
Reactome Gene Sets	6	R-HSA-453279	IM-LGD-L	Mitotic G1 phase and G1/S transition	-2.8	2.6	3.7	30286	149	1012	13	1.3	0.35	4067|4171|4173|4174|4175|5111|5687|5692|5696|5699|5710|5721|6118	LYN|MCM2|MCM4|MCM5|MCM6|PCNA|PSMA6|PSMB4|PSMB8|PSMB10|PSMD4|PSME2|RPA2	-2.3
Reactome Gene Sets	6	R-HSA-453274	GASTRITIS	Mitotic G2-G2/M phases	-2.1	2.3	2.9	30286	199	724	11	1.5	0.45	983|3320|3326|5048|5694|5695|5696|5699|5721|84617|203068	CDK1|HSP90AA1|HSP90AB1|PAFAH1B1|PSMB6|PSMB7|PSMB8|PSMB10|PSME2|TUBB6|TUBB	-1.7
Reactome Gene Sets	6	R-HSA-453274	EGC-L	Mitotic G2-G2/M phases	-2.5	2.1	3.3	30286	199	1217	17	1.4	0.34	983|3320|3326|5048|5108|5577|5696|5699|5704|5710|5721|10121|10382|22919|81027|84617|203068	CDK1|HSP90AA1|HSP90AB1|PAFAH1B1|PCM1|PRKAR2B|PSMB8|PSMB10|PSMC4|PSMD4|PSME2|ACTR1A|TUBB4A|MAPRE1|TUBB1|TUBB6|TUBB	-2.1
Reactome Gene Sets	6	R-HSA-2555396	EGC-L	Mitotic Metaphase and Anaphase	-6.5	3	6.2	30286	236	1217	28	2.3	0.43	983|1104|1783|3837|4001|5048|5696|5699|5704|5710|5721|5901|5903|5905|7112|7329|8243|9126|10382|10726|22919|23592|53371|55920|81027|84617|128866|221496	CDK1|RCC1|DYNC1LI2|KPNB1|LMNB1|PAFAH1B1|PSMB8|PSMB10|PSMC4|PSMD4|PSME2|RAN|RANBP2|RANGAP1|TMPO|UBE2I|SMC1A|SMC3|TUBB4A|NUDC|MAPRE1|LEMD3|NUP54|RCC2|TUBB1|TUBB6|CHMP4B|LEMD2	-5.4
Reactome Gene Sets	6	R-HSA-2555396	GASTRITIS	Mitotic Metaphase and Anaphase	-4.2	3	4.9	30286	236	724	17	2.3	0.56	983|3837|4001|5048|5694|5695|5696|5699|5721|5901|7329|9126|23592|25978|55920|84617|221496	CDK1|KPNB1|LMNB1|PAFAH1B1|PSMB6|PSMB7|PSMB8|PSMB10|PSME2|RAN|UBE2I|SMC3|LEMD3|CHMP2B|RCC2|TUBB6|LEMD2	-3.4
Reactome Gene Sets	6	R-HSA-2555396	IM-LGD-L	Mitotic Metaphase and Anaphase	-3	2.3	3.7	30286	236	1012	18	1.8	0.42	2010|4001|5687|5692|5696|5699|5710|5721|5901|5905|7329|10726|22919|23592|29082|55920|128866|221496	EMD|LMNB1|PSMA6|PSMB4|PSMB8|PSMB10|PSMD4|PSME2|RAN|RANGAP1|UBE2I|NUDC|MAPRE1|LEMD3|CHMP4A|RCC2|CHMP4B|LEMD2	-2.4
Reactome Gene Sets	6	R-HSA-68877	EGC-L	Mitotic Prometaphase	-3.2	2.3	3.8	30286	205	1217	19	1.6	0.36	983|1783|3320|5048|5108|5577|5903|5905|8243|9126|10121|10382|10592|10726|22919|55920|81027|84617|203068	CDK1|DYNC1LI2|HSP90AA1|PAFAH1B1|PCM1|PRKAR2B|RANBP2|RANGAP1|SMC1A|SMC3|ACTR1A|TUBB4A|SMC2|NUDC|MAPRE1|RCC2|TUBB1|TUBB6|TUBB	-2.6
Reactome Gene Sets	6	R-HSA-68875	EGC-L	Mitotic Prophase	-2.8	2.5	3.6	30286	141	1217	14	1.2	0.31	983|4001|4927|5903|7112|7175|8086|8480|10592|10762|23592|53371|128312|221496	CDK1|LMNB1|NUP88|RANBP2|TMPO|TPR|AAAS|RAE1|SMC2|NUP50|LEMD3|NUP54|H2BC26|LEMD2	-2.3
Reactome Gene Sets	6	R-HSA-2129379	GC-NL	Molecules associated with elastic fibres	-4.4	6.1	5.9	30286	37	1076	8	0.74	0.26	2200|2201|3685|4052|4053|4237|7448|10516	FBN1|FBN2|ITGAV|LTBP1|LTBP2|MFAP2|VTN|FBLN5	-3.1
Reactome Gene Sets	6	R-HSA-2129379	IM-LGD-NL	Molecules associated with elastic fibres	-2.1	7.4	4.1	30286	37	333	3	0.9	0.52	4053|4237|7448	LTBP2|MFAP2|VTN	-1.4
Reactome Gene Sets	6	R-HSA-72187	GASTRITIS	mRNA 3'-end processing	-5	6.4	6.5	30286	59	724	9	1.2	0.41	1477|1478|6428|6429|6431|8106|9877|10250|84324	CSTF1|CSTF2|SRSF3|SRSF4|SRSF6|PABPN1|ZC3H11A|SRRM1|SARNP	-4.1
Reactome Gene Sets	6	R-HSA-72187	GC-NL	mRNA 3'-end processing	-3	3.8	4.2	30286	59	1076	8	0.74	0.26	1478|6431|8106|9877|10189|10250|11051|51692	CSTF2|SRSF6|PABPN1|ZC3H11A|ALYREF|SRRM1|NUDT21|CPSF3	-2
Reactome Gene Sets	6	R-HSA-72187	EGC-L	mRNA 3'-end processing	-13	8.4	12	30286	59	1217	20	1.6	0.36	1477|1478|6428|6429|6431|7307|8106|8683|9295|9775|10189|10250|10914|11051|11338|23283|51692|79869|80145|84324	CSTF1|CSTF2|SRSF3|SRSF4|SRSF6|U2AF1|PABPN1|SRSF9|SRSF11|EIF4A3|ALYREF|SRRM1|PAPOLA|NUDT21|U2AF2|CSTF2T|CPSF3|CPSF7|THOC7|SARNP	-12
Reactome Gene Sets	6	R-HSA-72187	IM-LGD-L	mRNA 3'-end processing	-10	8.1	10	30286	59	1012	16	1.6	0.39	6431|6432|7919|8683|9295|9775|9785|9877|9939|10250|11051|11338|51692|79869|80145|84321	SRSF6|SRSF7|DDX39B|SRSF9|SRSF11|EIF4A3|DHX38|ZC3H11A|RBM8A|SRRM1|NUDT21|U2AF2|CPSF3|CPSF7|THOC7|THOC3	-8.8
Reactome Gene Sets	6	R-HSA-429958	IM-LGD-L	mRNA decay by 3' to 5' exoribonuclease	-2.8	7.5	4.8	30286	16	1012	4	0.4	0.2	6499|9652|28960|51013	SKIC2|SKIC3|DCPS|EXOSC1	-2.3
Reactome Gene Sets	6	R-HSA-429958	EGC-L	mRNA decay by 3' to 5' exoribonuclease	-8.6	14	11	30286	16	1217	9	0.74	0.25	6499|9652|11340|28960|51010|51013|54512|56915|118460	SKIC2|SKIC3|EXOSC8|DCPS|EXOSC3|EXOSC1|EXOSC4|EXOSC5|EXOSC6	-7.3
Reactome Gene Sets	6	R-HSA-430039	EGC-L	mRNA decay by 5' to 3' exoribonuclease	-7.5	13	9.7	30286	15	1217	8	0.66	0.23	11157|25804|27257|27258|51690|55802|80153|219988	LSM6|LSM4|LSM1|LSM3|LSM7|DCP1A|EDC3|PATL1	-6.3
Reactome Gene Sets	6	R-HSA-430039	IM-LGD-L	mRNA decay by 5' to 3' exoribonuclease	-2.9	8	5	30286	15	1012	4	0.4	0.2	1656|11157|57819|80153	DDX6|LSM6|LSM2|EDC3	-2.4
Reactome Gene Sets	6	R-HSA-72172	GASTRITIS	mRNA Splicing	-7.2	4.1	7.1	30286	215	724	21	2.9	0.62	2963|3181|3191|4236|4670|4809|5356|6428|6429|6431|6634|6636|9879|10250|10946|23398|23517|23524|51690|83443|220988	GTF2F2|HNRNPA2B1|HNRNPL|MFAP1|HNRNPM|SNU13|PLRG1|SRSF3|SRSF4|SRSF6|SNRPD3|SNRPF|DDX46|SRRM1|SF3A3|PPWD1|MTREX|SRRM2|LSM7|SF3B5|HNRNPA3	-6
Reactome Gene Sets	6	R-HSA-72172	GC-L	mRNA Splicing	-2.5	3.4	3.7	30286	215	336	8	2.4	0.83	2962|2963|3184|3191|5511|6431|22826|220988	GTF2F1|GTF2F2|HNRNPD|HNRNPL|PPP1R8|SRSF6|DNAJC8|HNRNPA3	-2.1
Reactome Gene Sets	6	R-HSA-72172	EGC-L	mRNA Splicing	-45	8.3	22	30286	215	1217	72	5.9	0.68	988|1655|1660|1665|2962|2963|3185|3187|3191|3312|3550|4236|4670|4809|5356|5411|5434|5511|5725|6428|6429|6431|6627|6628|6633|6634|6636|6637|7307|8683|8896|9128|9130|9295|9416|9775|9879|10179|10189|10250|10286|10523|10594|10915|10946|10992|11157|11338|22826|22938|23350|23398|23450|23517|23524|24148|25804|27238|27258|27336|27339|51503|51690|51729|51747|55100|58517|83443|84844|84991|85313|220988	CDC5L|DDX5|DHX9|DHX15|GTF2F1|GTF2F2|HNRNPF|HNRNPH1|HNRNPL|HSPA8|IK|MFAP1|HNRNPM|SNU13|PLRG1|PNN|POLR2E|PPP1R8|PTBP1|SRSF3|SRSF4|SRSF6|SNRPA1|SNRPB|SNRPD2|SNRPD3|SNRPF|SNRPG|U2AF1|SRSF9|BUD31|PRPF4|FAM50A|SRSF11|DDX23|EIF4A3|DDX46|RBM7|ALYREF|SRRM1|BCAS2|CHERP|PRPF8|TCERG1|SF3A3|SF3B2|LSM6|U2AF2|DNAJC8|SNW1|U2SURP|PPWD1|SF3B3|MTREX|SRRM2|PRPF6|LSM4|GPKOW|LSM3|HTATSF1|PRPF19|CWC15|LSM7|WBP11|LUC7L3…	-43
Reactome Gene Sets	6	R-HSA-72172	IM-LGD-L	mRNA Splicing	-21	6	14	30286	215	1012	43	4.2	0.63	1665|2962|2963|3184|3185|3187|3188|3312|4236|4809|5356|5411|5434|5725|6431|6432|6628|6636|7919|8683|9128|9295|9775|9785|9939|10250|10286|10523|10915|10946|10992|11157|11338|22826|23398|23450|23524|27339|51691|51747|57819|58517|84844	DHX15|GTF2F1|GTF2F2|HNRNPD|HNRNPF|HNRNPH1|HNRNPH2|HSPA8|MFAP1|SNU13|PLRG1|PNN|POLR2E|PTBP1|SRSF6|SRSF7|SNRPB|SNRPF|DDX39B|SRSF9|PRPF4|SRSF11|EIF4A3|DHX38|RBM8A|SRRM1|BCAS2|CHERP|TCERG1|SF3A3|SF3B2|LSM6|U2AF2|DNAJC8|PPWD1|SF3B3|SRRM2|PRPF19|LSM8|LUC7L3|LSM2|RBM25|PHF5A	-19
Reactome Gene Sets	6	R-HSA-72172	GC-NL	mRNA Splicing	-13	4.6	10	30286	215	1076	35	3.3	0.54	988|1660|1665|2962|2963|3181|3184|3191|4236|4670|4809|4904|5411|5434|5725|6431|6627|6632|6634|9129|9130|9416|10189|10250|10286|10594|10915|10946|22826|23450|24148|27336|51690|83443|220988	CDC5L|DHX9|DHX15|GTF2F1|GTF2F2|HNRNPA2B1|HNRNPD|HNRNPL|MFAP1|HNRNPM|SNU13|YBX1|PNN|POLR2E|PTBP1|SRSF6|SNRPA1|SNRPD1|SNRPD3|PRPF3|FAM50A|DDX23|ALYREF|SRRM1|BCAS2|PRPF8|TCERG1|SF3A3|DNAJC8|SF3B3|PRPF6|HTATSF1|LSM7|SF3B5|HNRNPA3	-11
Reactome Gene Sets	6	R-HSA-72163	GASTRITIS	mRNA Splicing - Major Pathway	-7.5	4.2	7.3	30286	207	724	21	2.9	0.62	2963|3181|3191|4236|4670|4809|5356|6428|6429|6431|6634|6636|9879|10250|10946|23398|23517|23524|51690|83443|220988	GTF2F2|HNRNPA2B1|HNRNPL|MFAP1|HNRNPM|SNU13|PLRG1|SRSF3|SRSF4|SRSF6|SNRPD3|SNRPF|DDX46|SRRM1|SF3A3|PPWD1|MTREX|SRRM2|LSM7|SF3B5|HNRNPA3	-6.3
Reactome Gene Sets	6	R-HSA-72163	GC-L	mRNA Splicing - Major Pathway	-2.6	3.5	3.8	30286	207	336	8	2.4	0.83	2962|2963|3184|3191|5511|6431|22826|220988	GTF2F1|GTF2F2|HNRNPD|HNRNPL|PPP1R8|SRSF6|DNAJC8|HNRNPA3	-2.2
Reactome Gene Sets	6	R-HSA-72163	EGC-L	mRNA Splicing - Major Pathway	-47	8.7	23	30286	207	1217	72	5.9	0.68	988|1655|1660|1665|2962|2963|3185|3187|3191|3312|3550|4236|4670|4809|5356|5411|5434|5511|5725|6428|6429|6431|6627|6628|6633|6634|6636|6637|7307|8683|8896|9128|9130|9295|9416|9775|9879|10179|10189|10250|10286|10523|10594|10915|10946|10992|11157|11338|22826|22938|23350|23398|23450|23517|23524|24148|25804|27238|27258|27336|27339|51503|51690|51729|51747|55100|58517|83443|84844|84991|85313|220988	CDC5L|DDX5|DHX9|DHX15|GTF2F1|GTF2F2|HNRNPF|HNRNPH1|HNRNPL|HSPA8|IK|MFAP1|HNRNPM|SNU13|PLRG1|PNN|POLR2E|PPP1R8|PTBP1|SRSF3|SRSF4|SRSF6|SNRPA1|SNRPB|SNRPD2|SNRPD3|SNRPF|SNRPG|U2AF1|SRSF9|BUD31|PRPF4|FAM50A|SRSF11|DDX23|EIF4A3|DDX46|RBM7|ALYREF|SRRM1|BCAS2|CHERP|PRPF8|TCERG1|SF3A3|SF3B2|LSM6|U2AF2|DNAJC8|SNW1|U2SURP|PPWD1|SF3B3|MTREX|SRRM2|PRPF6|LSM4|GPKOW|LSM3|HTATSF1|PRPF19|CWC15|LSM7|WBP11|LUC7L3…	-44
Reactome Gene Sets	6	R-HSA-72163	IM-LGD-L	mRNA Splicing - Major Pathway	-21	6.2	14	30286	207	1012	43	4.2	0.63	1665|2962|2963|3184|3185|3187|3188|3312|4236|4809|5356|5411|5434|5725|6431|6432|6628|6636|7919|8683|9128|9295|9775|9785|9939|10250|10286|10523|10915|10946|10992|11157|11338|22826|23398|23450|23524|27339|51691|51747|57819|58517|84844	DHX15|GTF2F1|GTF2F2|HNRNPD|HNRNPF|HNRNPH1|HNRNPH2|HSPA8|MFAP1|SNU13|PLRG1|PNN|POLR2E|PTBP1|SRSF6|SRSF7|SNRPB|SNRPF|DDX39B|SRSF9|PRPF4|SRSF11|EIF4A3|DHX38|RBM8A|SRRM1|BCAS2|CHERP|TCERG1|SF3A3|SF3B2|LSM6|U2AF2|DNAJC8|PPWD1|SF3B3|SRRM2|PRPF19|LSM8|LUC7L3|LSM2|RBM25|PHF5A	-19
Reactome Gene Sets	6	R-HSA-72163	GC-NL	mRNA Splicing - Major Pathway	-14	4.8	10	30286	207	1076	35	3.3	0.54	988|1660|1665|2962|2963|3181|3184|3191|4236|4670|4809|4904|5411|5434|5725|6431|6627|6632|6634|9129|9130|9416|10189|10250|10286|10594|10915|10946|22826|23450|24148|27336|51690|83443|220988	CDC5L|DHX9|DHX15|GTF2F1|GTF2F2|HNRNPA2B1|HNRNPD|HNRNPL|MFAP1|HNRNPM|SNU13|YBX1|PNN|POLR2E|PTBP1|SRSF6|SNRPA1|SNRPD1|SNRPD3|PRPF3|FAM50A|DDX23|ALYREF|SRRM1|BCAS2|PRPF8|TCERG1|SF3A3|DNAJC8|SF3B3|PRPF6|HTATSF1|LSM7|SF3B5|HNRNPA3	-12
Reactome Gene Sets	6	R-HSA-72165	EGC-L	mRNA Splicing - Minor Pathway	-9.2	7.5	9.4	30286	50	1217	15	1.2	0.32	2962|2963|5434|6431|6628|6633|6634|6636|6637|9416|10594|10992|23450|24148|83443	GTF2F1|GTF2F2|POLR2E|SRSF6|SNRPB|SNRPD2|SNRPD3|SNRPF|SNRPG|DDX23|PRPF8|SF3B2|SF3B3|PRPF6|SF3B5	-7.9
Reactome Gene Sets	6	R-HSA-72165	GC-NL	mRNA Splicing - Minor Pathway	-6.9	6.8	7.8	30286	50	1076	12	1.1	0.32	2962|2963|4904|5434|6431|6632|6634|9416|10594|23450|24148|83443	GTF2F1|GTF2F2|YBX1|POLR2E|SRSF6|SNRPD1|SNRPD3|DDX23|PRPF8|SF3B3|PRPF6|SF3B5	-5.3
Reactome Gene Sets	6	R-HSA-72165	IM-LGD-L	mRNA Splicing - Minor Pathway	-4.4	5.4	5.8	30286	50	1012	9	0.89	0.3	2962|2963|5434|6431|6432|6628|6636|10992|23450	GTF2F1|GTF2F2|POLR2E|SRSF6|SRSF7|SNRPB|SNRPF|SF3B2|SF3B3	-3.6
Reactome Gene Sets	6	R-HSA-72165	GASTRITIS	mRNA Splicing - Minor Pathway	-2.2	4.2	3.5	30286	50	724	5	0.69	0.31	2963|6431|6634|6636|83443	GTF2F2|SRSF6|SNRPD3|SNRPF|SF3B5	-1.8
Reactome Gene Sets	6	R-HSA-5602498	EGC-L	MyD88 deficiency (TLR2/4)	-4.5	8.8	6.6	30286	17	1217	6	0.49	0.2	929|2243|2244|3146|6279|6280	CD14|FGA|FGB|HMGB1|S100A8|S100A9	-3.6
Reactome Gene Sets	6	R-HSA-5602498	GC-NL	MyD88 deficiency (TLR2/4)	-3.6	8.3	5.8	30286	17	1076	5	0.46	0.21	929|2243|2244|6279|6280	CD14|FGA|FGB|S100A8|S100A9	-2.5
Reactome Gene Sets	6	R-HSA-5602498	GASTRITIS	MyD88 deficiency (TLR2/4)	-2.1	7.4	4.1	30286	17	724	3	0.41	0.24	929|3146|6279	CD14|HMGB1|S100A8	-1.8
Reactome Gene Sets	6	R-HSA-975155	EGC-NL	MyD88 dependent cascade initiated on endosome	-2.1	7.3	4	30286	104	120	3	2.5	1.4	929|6195|79671	CD14|RPS6KA1|NLRX1	-1.3
Reactome Gene Sets	6	R-HSA-166058	GC-L	MyD88:MAL(TIRAP) cascade initiated on plasma membrane	-2.1	4	3.4	30286	113	336	5	1.5	0.66	6279|8517|9261|79671|121457	S100A8|IKBKG|MAPKAPK2|NLRX1|IKBIP	-1.7
Reactome Gene Sets	6	R-HSA-166166	GC-L	MyD88-independent TLR4 cascade	-2.1	4.1	3.4	30286	111	336	5	1.5	0.66	7323|8517|9261|79671|121457	UBE2D3|IKBKG|MAPKAPK2|NLRX1|IKBIP	-1.8
Reactome Gene Sets	6	R-HSA-166166	EGC-NL	MyD88-independent TLR4 cascade	-2	6.8	3.9	30286	111	120	3	2.5	1.4	929|6195|79671	CD14|RPS6KA1|NLRX1	-1.3
Reactome Gene Sets	6	R-HSA-164940	GC-NL	Nef mediated downregulation of MHC class I complex cell surface expression	-2.4	8.4	4.5	30286	10	1076	3	0.28	0.16	164|1174|10053	AP1G1|AP1S1|AP1M2	-1.6
Reactome Gene Sets	6	R-HSA-164940	EGC-L	Nef mediated downregulation of MHC class I complex cell surface expression	-2.2	7.5	4.2	30286	10	1217	3	0.25	0.14	164|1174|10053	AP1G1|AP1S1|AP1M2	-1.8
Reactome Gene Sets	6	R-HSA-164938	GC-NL	Nef-mediates down modulation of cell surface receptors by recruiting them to clathrin adapters	-2.2	5.4	3.8	30286	21	1076	4	0.37	0.19	164|1173|1174|10053	AP1G1|AP2M1|AP1S1|AP1M2	-1.5
Reactome Gene Sets	6	R-HSA-164938	EGC-L	Nef-mediates down modulation of cell surface receptors by recruiting them to clathrin adapters	-2	4.7	3.5	30286	21	1217	4	0.33	0.16	164|1173|1174|10053	AP1G1|AP2M1|AP1S1|AP1M2	-1.7
Reactome Gene Sets	6	R-HSA-6807004	GC-L	Negative regulation of MET activity	-4.1	17	7.9	30286	21	336	4	1.2	0.59	5770|6455|6456|30011	PTPN1|SH3GL1|SH3GL2|SH3KBP1	-3.4
Reactome Gene Sets	6	R-HSA-6807004	GASTRITIS	Negative regulation of MET activity	-3.9	10	6.4	30286	21	724	5	0.69	0.31	867|5770|6456|8027|30011	CBL|PTPN1|SH3GL2|STAM|SH3KBP1	-3.2
Reactome Gene Sets	6	R-HSA-6807004	GC-NL	Negative regulation of MET activity	-4.2	8	6.2	30286	21	1076	6	0.56	0.23	867|5770|6233|6455|8027|30011	CBL|PTPN1|RPS27A|SH3GL1|STAM|SH3KBP1	-2.9
Reactome Gene Sets	6	R-HSA-6807004	EGC-L	Negative regulation of MET activity	-3.9	7.1	5.7	30286	21	1217	6	0.49	0.2	867|2060|5770|6455|8027|30011	CBL|EPS15|PTPN1|SH3GL1|STAM|SH3KBP1	-3.2
Reactome Gene Sets	6	R-HSA-9604323	GASTRITIS	Negative regulation of NOTCH4 signaling	-2	3.9	3.3	30286	54	724	5	0.69	0.31	5694|5695|5696|5699|5721	PSMB6|PSMB7|PSMB8|PSMB10|PSME2	-1.7
Reactome Gene Sets	6	R-HSA-9604323	IM-LGD-L	Negative regulation of NOTCH4 signaling	-2	3.3	3.2	30286	54	1012	6	0.59	0.24	5687|5692|5696|5699|5710|5721	PSMA6|PSMB4|PSMB8|PSMB10|PSMD4|PSME2	-1.7
Reactome Gene Sets	6	R-HSA-168333	EGC-L	NEP/NS2 Interacts with the Cellular Export Machinery	-4.6	6.4	6.2	30286	31	1217	8	0.66	0.23	4927|5901|5903|7175|8086|8480|10762|53371	NUP88|RAN|RANBP2|TPR|AAAS|RAE1|NUP50|NUP54	-3.8
Reactome Gene Sets	6	R-HSA-168333	GC-NL	NEP/NS2 Interacts with the Cellular Export Machinery	-2.4	4.5	3.8	30286	31	1076	5	0.46	0.21	5901|7175|8086|8480|53371	RAN|TPR|AAAS|RAE1|NUP54	-1.6
Reactome Gene Sets	6	R-HSA-9675108	EGC-L	Nervous system development	-7.7	2.3	6.4	30286	573	1217	53	4.4	0.59	214|388|1173|1291|1292|1605|1741|1809|3312|3320|3326|3674|3908|4067|4318|4478|4627|4637|4736|5062|5216|5217|5696|5699|5704|5710|5721|5786|5788|6122|6134|6135|6136|6139|6146|6188|6193|6210|6231|6923|7094|7402|7408|9775|9826|10095|10382|10552|23521|30011|81027|84617|103910	ALCAM|RHOB|AP2M1|COL6A1|COL6A2|DAG1|DLG3|DPYSL3|HSPA8|HSP90AA1|HSP90AB1|ITGA2B|LAMA2|LYN|MMP9|MSN|MYH9|MYL6|RPL10A|PAK2|PFN1|PFN2|PSMB8|PSMB10|PSMC4|PSMD4|PSME2|PTPRA|PTPRC|RPL3|RPL10|RPL11|RPL12|RPL17|RPL22|RPS3|RPS5|RPS15A|RPS26|ELOB|TLN1|UTRN|VASP|EIF4A3|ARHGEF11|ARPC1B|TUBB4A|ARPC1A|RPL13A|SH3KBP1|TUBB1|TUBB6|MYL12B	-6.5
Reactome Gene Sets	6	R-HSA-9675108	GC-NL	Nervous system development	-5.8	2.2	5.4	30286	573	1076	44	4.1	0.6	1173|1213|1291|1292|1605|1741|1809|2049|2197|3326|3673|3678|3685|3908|4067|4313|4318|4478|4627|4637|4736|5062|5217|5695|5704|5788|6146|6169|6170|6193|6209|6210|6233|6235|7094|7430|7525|9349|10095|10552|23521|30011|84617|103910	AP2M1|CLTC|COL6A1|COL6A2|DAG1|DLG3|DPYSL3|EPHB3|FAU|HSP90AB1|ITGA2|ITGA5|ITGAV|LAMA2|LYN|MMP2|MMP9|MSN|MYH9|MYL6|RPL10A|PAK2|PFN2|PSMB7|PSMC4|PTPRC|RPL22|RPL38|RPL39|RPS5|RPS15|RPS15A|RPS27A|RPS29|TLN1|EZR|YES1|RPL23|ARPC1B|ARPC1A|RPL13A|SH3KBP1|TUBB6|MYL12B	-4.3
Reactome Gene Sets	6	R-HSA-9675108	IM-LGD-L	Nervous system development	-4.6	2	4.7	30286	573	1012	39	3.9	0.61	214|1072|1605|1741|2197|3312|3320|3672|3673|3674|3908|4067|4637|4893|5216|5217|5306|5687|5692|5696|5699|5710|5721|5786|5788|6146|6195|6197|6231|7430|8976|9775|9826|9939|10095|10109|10552|30011|200916	ALCAM|CFL1|DAG1|DLG3|FAU|HSPA8|HSP90AA1|ITGA1|ITGA2|ITGA2B|LAMA2|LYN|MYL6|NRAS|PFN1|PFN2|PITPNA|PSMA6|PSMB4|PSMB8|PSMB10|PSMD4|PSME2|PTPRA|PTPRC|RPL22|RPS6KA1|RPS6KA3|RPS26|EZR|WASL|EIF4A3|ARHGEF11|RBM8A|ARPC1B|ARPC2|ARPC1A|SH3KBP1|RPL22L1	-3.7
Reactome Gene Sets	6	R-HSA-9675108	GASTRITIS	Nervous system development	-2.5	1.8	3.1	30286	573	724	25	3.5	0.68	1291|1292|1741|1956|3320|3326|4067|4478|5217|5532|5694|5695|5696|5699|5721|5788|6209|6456|7094|7430|8976|10095|30011|84617|200916	COL6A1|COL6A2|DLG3|EGFR|HSP90AA1|HSP90AB1|LYN|MSN|PFN2|PPP3CB|PSMB6|PSMB7|PSMB8|PSMB10|PSME2|PTPRC|RPS15|SH3GL2|TLN1|EZR|WASL|ARPC1B|SH3KBP1|TUBB6|RPL22L1	-2.1
Reactome Gene Sets	6	R-HSA-112311	GASTRITIS	Neurotransmitter clearance	-2.8	13	5.7	30286	10	724	3	0.41	0.24	217|1312|4128	ALDH2|COMT|MAOA	-2.3
Reactome Gene Sets	6	R-HSA-112310	IM-LGD-L	Neurotransmitter release cycle	-2.2	3.5	3.3	30286	51	1012	6	0.59	0.24	3312|4128|6844|7915|8573|27163	HSPA8|MAOA|VAMP2|ALDH5A1|CASK|NAAA	-1.8
Reactome Gene Sets	6	R-HSA-6798695	GC-L	Neutrophil degranulation	-31	9	19	30286	480	336	48	14	1.9	175|178|290|566|820|960|966|978|1075|1508|1522|1727|1991|2040|2717|2990|2992|3106|3615|3689|3916|4057|4125|4257|4318|4718|5284|5657|5777|5836|6036|6279|6282|8635|8836|8904|8993|9522|9535|10394|10562|10875|25840|29108|51806|80301|81567|388697	AGA|AGL|ANPEP|AZU1|CAMP|CD44|CD59|CDA|CTSC|CTSB|CTSZ|CYB5R3|ELANE|STOM|GLA|GUSB|GYG1|HLA-B|IMPDH2|ITGB2|LAMP1|LTF|MAN2B1|MGST1|MMP9|NDUFC2|PIGR|PRTN3|PTPN6|PYGL|RNASE2|S100A8|S100A11|RNASET2|GGH|CPNE1|PGLYRP1|SCAMP1|GMFG|PRG3|OLFM4|FGL2|TMT1A|PYCARD|CALML5|PLEKHO2|TXNDC5|HRNR	-28
Reactome Gene Sets	6	R-HSA-6798695	GASTRITIS	Neutrophil degranulation	-24	5.1	14	30286	480	724	59	8.1	1	26|175|178|391|566|929|960|966|976|1075|1508|1512|1522|1536|1727|1794|1938|1991|2171|2990|2992|3106|3146|3163|3320|3326|3615|3689|3837|4125|4718|5005|5269|5284|5657|5695|5777|5788|6279|6283|6793|7276|7415|8836|8904|9522|9535|9545|9761|10394|10875|23526|25840|29108|55276|79792|80301|81567|203068	AOC1|AGA|AGL|RHOG|AZU1|CD14|CD44|CD59|ADGRE5|CTSC|CTSB|CTSH|CTSZ|CYBB|CYB5R3|DOCK2|EEF2|ELANE|FABP5|GUSB|GYG1|HLA-B|HMGB1|HMOX2|HSP90AA1|HSP90AB1|IMPDH2|ITGB2|KPNB1|MAN2B1|NDUFC2|ORM2|SERPINB6|PIGR|PRTN3|PSMB7|PTPN6|PTPRC|S100A8|S100A12|STK10|TTR|VCP|GGH|CPNE1|SCAMP1|GMFG|RAB3D|MLEC|PRG3|FGL2|ARHGAP45|TMT1A|PYCARD|PGM2|GSDMD|PLEKHO2|TXNDC5|TUBB	-22
Reactome Gene Sets	6	R-HSA-6798695	IM-LGD-NL	Neutrophil degranulation	-17	6.4	13	30286	480	333	34	10	1.7	175|1075|1508|1522|1536|1654|1727|2519|2992|3326|3615|3684|3689|5284|5657|5777|5788|6036|6037|6279|8836|9522|9535|9545|10394|10562|10788|25840|29108|51806|54472|80301|81567|388697	AGA|CTSC|CTSB|CTSZ|CYBB|DDX3X|CYB5R3|FUCA2|GYG1|HSP90AB1|IMPDH2|ITGAM|ITGB2|PIGR|PRTN3|PTPN6|PTPRC|RNASE2|RNASE3|S100A8|GGH|SCAMP1|GMFG|RAB3D|PRG3|OLFM4|IQGAP2|TMT1A|PYCARD|CALML5|TOLLIP|PLEKHO2|TXNDC5|HRNR	-15
Reactome Gene Sets	6	R-HSA-6798695	EGC-NL	Neutrophil degranulation	-14	11	13	30286	480	120	20	17	3.4	175|290|671|929|978|1471|1522|1991|2171|2799|2992|3689|5236|5657|6286|6590|7276|8836|51806|80301	AGA|ANPEP|BPI|CD14|CDA|CST3|CTSZ|ELANE|FABP5|GNS|GYG1|ITGB2|PGM1|PRTN3|S100P|SLPI|TTR|GGH|CALML5|PLEKHO2	-12
Reactome Gene Sets	6	R-HSA-6798695	GC-NL	Neutrophil degranulation	-42	5.5	19	30286	480	1076	94	8.7	0.86	1|26|178|230|290|391|566|671|683|718|820|929|960|966|976|978|1075|1265|1471|1508|1522|1536|1654|1727|1991|2040|2171|2512|2519|2547|2760|2990|2992|3101|3106|3163|3326|3614|3615|3684|3685|3689|4057|4125|4257|4318|4332|4718|5004|5199|5265|5269|5284|5473|5580|5657|5695|5768|5777|5788|5836|6036|6037|6279|6280|6793|8673|8826|8836|8904|8993|9522|9535|9545|10120|10394|10562|10788|10875|23071|23526|25801|…	A1BG|AOC1|AGL|ALDOC|ANPEP|RHOG|AZU1|BPI|BST1|C3|CAMP|CD14|CD44|CD59|ADGRE5|CDA|CTSC|CNN2|CST3|CTSB|CTSZ|CYBB|DDX3X|CYB5R3|ELANE|STOM|FABP5|FTL|FUCA2|XRCC6|GM2A|GUSB|GYG1|HK3|HLA-B|HMOX2|HSP90AB1|IMPDH1|IMPDH2|ITGAM|ITGAV|ITGB2|LTF|MAN2B1|MGST1|MMP9|MNDA|NDUFC2|ORM1|CFP|SERPINA1|SERPINB6|PIGR|PPBP|PRKCD|PRTN3|PSMB7|QSOX1|PTPN6|PTPRC|PYGL|RNASE2|RNASE3|S100A8|S100A9|STK10|VAMP8|IQGAP1|GGH|CPNE1|PGL…	-39
Reactome Gene Sets	6	R-HSA-6798695	EGC-L	Neutrophil degranulation	-38	4.9	18	30286	480	1217	95	7.8	0.77	1|178|226|290|353|566|683|718|929|960|966|976|978|1075|1471|1476|1508|1512|1522|1536|1650|1654|1727|1938|1991|1992|2040|2519|2717|2990|2992|3074|3106|3146|3163|3312|3320|3326|3608|3615|3684|3689|3837|3916|4057|4125|4257|4282|4318|4332|4718|5199|5269|5284|5473|5580|5611|5646|5657|5768|5777|5788|5869|6279|6280|6282|6793|8826|8836|8904|8993|9522|9535|9545|9588|9761|9961|10120|10562|10694|10788|10970…	A1BG|AGL|ALDOA|ANPEP|APRT|AZU1|BST1|C3|CD14|CD44|CD59|ADGRE5|CDA|CTSC|CST3|CSTB|CTSB|CTSH|CTSZ|CYBB|DDOST|DDX3X|CYB5R3|EEF2|ELANE|SERPINB1|STOM|FUCA2|GLA|GUSB|GYG1|HEXB|HLA-B|HMGB1|HMOX2|HSPA8|HSP90AA1|HSP90AB1|ILF2|IMPDH2|ITGAM|ITGB2|KPNB1|LAMP1|LTF|MAN2B1|MGST1|MIF|MMP9|MNDA|NDUFC2|CFP|SERPINB6|PIGR|PPBP|PRKCD|DNAJC3|PRSS3|PRTN3|QSOX1|PTPN6|PTPRC|RAB5B|S100A8|S100A9|S100A11|STK10|IQGAP1|GGH|CPN…	-36
Reactome Gene Sets	6	R-HSA-6798695	IM-LGD-L	Neutrophil degranulation	-24	4.3	14	30286	480	1012	69	6.8	0.79	1|12|26|178|197|566|718|820|960|976|978|1075|1508|1522|1654|1727|1991|1992|2519|2990|2992|3074|3106|3312|3320|3615|3684|3689|4257|4718|4790|4893|5004|5005|5199|5265|5269|5284|5473|5657|5777|5788|5878|6279|6282|7520|8836|8904|9522|9535|9961|10562|10694|10788|10857|10875|10970|23406|25801|25840|29108|51382|55276|80142|80301|81567|84061|116844|388697	A1BG|SERPINA3|AOC1|AGL|AHSG|AZU1|C3|CAMP|CD44|ADGRE5|CDA|CTSC|CTSB|CTSZ|DDX3X|CYB5R3|ELANE|SERPINB1|FUCA2|GUSB|GYG1|HEXB|HLA-B|HSPA8|HSP90AA1|IMPDH2|ITGAM|ITGB2|MGST1|NDUFC2|NFKB1|NRAS|ORM1|ORM2|CFP|SERPINA1|SERPINB6|PIGR|PPBP|PRTN3|PTPN6|PTPRC|RAB5C|S100A8|S100A11|XRCC5|GGH|CPNE1|SCAMP1|GMFG|MVP|OLFM4|CCT8|IQGAP2|PGRMC1|FGL2|CKAP4|COTL1|GCA|TMT1A|PYCARD|ATP6V1D|PGM2|PTGES2|PLEKHO2|TXNDC5|MAGT1|L…	-22
Reactome Gene Sets	6	R-HSA-532668	GASTRITIS	N-glycan trimming in the ER and Calnexin/Calreticulin cycle	-2.9	6	4.6	30286	35	724	5	0.69	0.31	811|2923|7415|9761|80267	CALR|PDIA3|VCP|MLEC|EDEM3	-2.3
Reactome Gene Sets	6	R-HSA-196807	GC-L	Nicotinate metabolism	-2.3	8.7	4.6	30286	31	336	3	0.89	0.51	4907|10135|128240	NT5E|NAMPT|NAXE	-1.9
Reactome Gene Sets	6	R-HSA-196807	GASTRITIS	Nicotinate metabolism	-3.1	6.7	5	30286	31	724	5	0.69	0.31	952|4907|10135|23475|128240	CD38|NT5E|NAMPT|QPRT|NAXE	-2.5
Reactome Gene Sets	6	R-HSA-196807	EGC-L	Nicotinate metabolism	-2.1	4	3.4	30286	31	1217	5	0.41	0.18	683|4907|10135|23475|128240	BST1|NT5E|NAMPT|QPRT|NAXE	-1.8
Reactome Gene Sets	6	R-HSA-3000171	IM-LGD-L	Non-integrin membrane-ECM interactions	-3.1	4.1	4.4	30286	59	1012	8	0.79	0.28	1605|3655|3673|3908|3914|7057|7448|8573	DAG1|ITGA6|ITGA2|LAMA2|LAMB3|THBS1|VTN|CASK	-2.6
Reactome Gene Sets	6	R-HSA-3000171	GC-NL	Non-integrin membrane-ECM interactions	-3	3.8	4.2	30286	59	1076	8	0.74	0.26	1605|3673|3685|3908|3914|7057|7448|8573	DAG1|ITGA2|ITGAV|LAMA2|LAMB3|THBS1|VTN|CASK	-2
Reactome Gene Sets	6	R-HSA-3000171	EGC-L	Non-integrin membrane-ECM interactions	-2.6	3.4	3.7	30286	59	1217	8	0.66	0.23	1277|1605|3655|3908|3914|7057|7448|8573	COL1A1|DAG1|ITGA6|LAMA2|LAMB3|THBS1|VTN|CASK	-2.2
Reactome Gene Sets	6	R-HSA-3000171	IM-LGD-NL	Non-integrin membrane-ECM interactions	-3.3	7.7	5.4	30286	59	333	5	1.5	0.67	3371|3911|7057|7448|8573	TNC|LAMA5|THBS1|VTN|CASK	-2.3
Reactome Gene Sets	6	R-HSA-975957	EGC-L	Nonsense Mediated Decay (NMD) enhanced by the Exon Junction Complex (EJC)	-3.6	3	4.4	30286	116	1217	14	1.2	0.31	4736|6122|6134|6135|6136|6139|6146|6188|6193|6210|6231|9775|23521|55802	RPL10A|RPL3|RPL10|RPL11|RPL12|RPL17|RPL22|RPS3|RPS5|RPS15A|RPS26|EIF4A3|RPL13A|DCP1A	-3
Reactome Gene Sets	6	R-HSA-975957	GC-NL	Nonsense Mediated Decay (NMD) enhanced by the Exon Junction Complex (EJC)	-3.1	2.9	4	30286	116	1076	12	1.1	0.32	2197|4736|6146|6169|6170|6193|6209|6210|6233|6235|9349|23521	FAU|RPL10A|RPL22|RPL38|RPL39|RPS5|RPS15|RPS15A|RPS27A|RPS29|RPL23|RPL13A	-2.1
Reactome Gene Sets	6	R-HSA-975956	GC-NL	Nonsense Mediated Decay (NMD) independent of the Exon Junction Complex (EJC)	-3.8	3.5	4.7	30286	96	1076	12	1.1	0.32	2197|4736|6146|6169|6170|6193|6209|6210|6233|6235|9349|23521	FAU|RPL10A|RPL22|RPL38|RPL39|RPS5|RPS15|RPS15A|RPS27A|RPS29|RPL23|RPL13A	-2.7
Reactome Gene Sets	6	R-HSA-975956	EGC-L	Nonsense Mediated Decay (NMD) independent of the Exon Junction Complex (EJC)	-3.3	3.1	4.2	30286	96	1217	12	0.99	0.28	4736|6122|6134|6135|6136|6139|6146|6188|6193|6210|6231|23521	RPL10A|RPL3|RPL10|RPL11|RPL12|RPL17|RPL22|RPS3|RPS5|RPS15A|RPS26|RPL13A	-2.7
Reactome Gene Sets	6	R-HSA-927802	EGC-L	Nonsense-Mediated Decay (NMD)	-3.6	3	4.4	30286	116	1217	14	1.2	0.31	4736|6122|6134|6135|6136|6139|6146|6188|6193|6210|6231|9775|23521|55802	RPL10A|RPL3|RPL10|RPL11|RPL12|RPL17|RPL22|RPS3|RPS5|RPS15A|RPS26|EIF4A3|RPL13A|DCP1A	-3
Reactome Gene Sets	6	R-HSA-927802	GC-NL	Nonsense-Mediated Decay (NMD)	-3.1	2.9	4	30286	116	1076	12	1.1	0.32	2197|4736|6146|6169|6170|6193|6209|6210|6233|6235|9349|23521	FAU|RPL10A|RPL22|RPL38|RPL39|RPS5|RPS15|RPS15A|RPS27A|RPS29|RPL23|RPL13A	-2.1
Reactome Gene Sets	6	R-HSA-9029569	GC-L	NR1H3 & NR1H2 regulate gene expression linked to cholesterol transport and efflux	-2.1	7.3	4.1	30286	37	336	3	0.89	0.51	341|348|80820	APOC1|APOE|EEPD1	-1.8
Reactome Gene Sets	6	R-HSA-9029569	IM-LGD-L	NR1H3 & NR1H2 regulate gene expression linked to cholesterol transport and efflux	-2.1	4	3.4	30286	37	1012	5	0.49	0.22	341|344|347|348|80820	APOC1|APOC2|APOD|APOE|EEPD1	-1.8
Reactome Gene Sets	6	R-HSA-9029569	GC-NL	NR1H3 & NR1H2 regulate gene expression linked to cholesterol transport and efflux	-2	3.8	3.3	30286	37	1076	5	0.46	0.21	341|344|347|348|80820	APOC1|APOC2|APOD|APOE|EEPD1	-1.3
Reactome Gene Sets	6	R-HSA-168276	EGC-L	NS1 Mediated Effects on Host Pathways	-5.5	6.2	6.8	30286	40	1217	10	0.82	0.26	3837|3838|4927|5903|7175|8086|8106|8480|10762|53371	KPNB1|KPNA2|NUP88|RANBP2|TPR|AAAS|PABPN1|RAE1|NUP50|NUP54	-4.6
Reactome Gene Sets	6	R-HSA-2995410	EGC-L	Nuclear Envelope (NE) Reassembly	-6.6	5	7.1	30286	75	1217	15	1.2	0.32	983|1104|3837|4001|5901|5905|7112|7329|10382|23592|53371|81027|84617|128866|221496	CDK1|RCC1|KPNB1|LMNB1|RAN|RANGAP1|TMPO|UBE2I|TUBB4A|LEMD3|NUP54|TUBB1|TUBB6|CHMP4B|LEMD2	-5.5
Reactome Gene Sets	6	R-HSA-2995410	GASTRITIS	Nuclear Envelope (NE) Reassembly	-4.1	5	5.5	30286	75	724	9	1.2	0.41	983|3837|4001|5901|7329|23592|25978|84617|221496	CDK1|KPNB1|LMNB1|RAN|UBE2I|LEMD3|CHMP2B|TUBB6|LEMD2	-3.4
Reactome Gene Sets	6	R-HSA-2995410	IM-LGD-L	Nuclear Envelope (NE) Reassembly	-3.1	3.6	4.2	30286	75	1012	9	0.89	0.3	2010|4001|5901|5905|7329|23592|29082|128866|221496	EMD|LMNB1|RAN|RANGAP1|UBE2I|LEMD3|CHMP4A|CHMP4B|LEMD2	-2.5
Reactome Gene Sets	6	R-HSA-2995410	GC-NL	Nuclear Envelope (NE) Reassembly	-2.3	3	3.3	30286	75	1076	8	0.74	0.26	983|1104|4001|5901|7329|23592|53371|84617	CDK1|RCC1|LMNB1|RAN|UBE2I|LEMD3|NUP54|TUBB6	-1.5
Reactome Gene Sets	6	R-HSA-2980766	GASTRITIS	Nuclear Envelope Breakdown	-2.8	4.8	4.3	30286	52	724	6	0.83	0.34	983|4001|7175|8480|23592|221496	CDK1|LMNB1|TPR|RAE1|LEMD3|LEMD2	-2.3
Reactome Gene Sets	6	R-HSA-2980766	IM-LGD-L	Nuclear Envelope Breakdown	-2.8	4	4.1	30286	52	1012	7	0.69	0.26	2010|4001|4927|8480|10762|23592|221496	EMD|LMNB1|NUP88|RAE1|NUP50|LEMD3|LEMD2	-2.3
Reactome Gene Sets	6	R-HSA-2980766	GC-NL	Nuclear Envelope Breakdown	-2.6	3.8	3.9	30286	52	1076	7	0.65	0.25	983|4001|7175|8086|8480|23592|53371	CDK1|LMNB1|TPR|AAAS|RAE1|LEMD3|NUP54	-1.8
Reactome Gene Sets	6	R-HSA-2980766	EGC-L	Nuclear Envelope Breakdown	-6.1	5.7	7	30286	52	1217	12	0.99	0.28	983|4001|4927|5903|7112|7175|8086|8480|10762|23592|53371|221496	CDK1|LMNB1|NUP88|RANBP2|TMPO|TPR|AAAS|RAE1|NUP50|LEMD3|NUP54|LEMD2	-5.1
Reactome Gene Sets	6	R-HSA-9759194	GASTRITIS	Nuclear events mediated by NFE2L2	-2.1	3	3.1	30286	97	724	7	0.97	0.36	2940|3162|5694|5695|5696|5699|5721	GSTA3|HMOX1|PSMB6|PSMB7|PSMB8|PSMB10|PSME2	-1.7
Reactome Gene Sets	6	R-HSA-9759194	IM-LGD-L	Nuclear events mediated by NFE2L2	-2.3	2.8	3.3	30286	97	1012	9	0.89	0.3	3162|4790|5687|5692|5696|5699|5710|5721|8878	HMOX1|NFKB1|PSMA6|PSMB4|PSMB8|PSMB10|PSMD4|PSME2|SQSTM1	-1.9
Reactome Gene Sets	6	R-HSA-9759194	EGC-L	Nuclear events mediated by NFE2L2	-2.2	2.6	3.2	30286	97	1217	10	0.82	0.26	2940|5226|5696|5699|5704|5710|5721|6888|8878|10061	GSTA3|PGD|PSMB8|PSMB10|PSMC4|PSMD4|PSME2|TALDO1|SQSTM1|ABCF2	-1.9
Reactome Gene Sets	6	R-HSA-180746	EGC-L	Nuclear import of Rev protein	-6.4	7.5	7.7	30286	33	1217	10	0.82	0.26	1104|3837|4927|5901|5903|7175|8086|8480|10762|53371	RCC1|KPNB1|NUP88|RAN|RANBP2|TPR|AAAS|RAE1|NUP50|NUP54	-5.3
Reactome Gene Sets	6	R-HSA-180746	GASTRITIS	Nuclear import of Rev protein	-2.1	5.1	3.7	30286	33	724	4	0.55	0.28	3837|5901|7175|8480	KPNB1|RAN|TPR|RAE1	-1.8
Reactome Gene Sets	6	R-HSA-180746	GC-NL	Nuclear import of Rev protein	-3	5.1	4.5	30286	33	1076	6	0.56	0.23	1104|5901|7175|8086|8480|53371	RCC1|RAN|TPR|AAAS|RAE1|NUP54	-2.1
Reactome Gene Sets	6	R-HSA-3301854	EGC-L	Nuclear Pore Complex (NPC) Disassembly	-4.2	5.7	5.7	30286	35	1217	8	0.66	0.23	983|4927|5903|7175|8086|8480|10762|53371	CDK1|NUP88|RANBP2|TPR|AAAS|RAE1|NUP50|NUP54	-3.4
Reactome Gene Sets	6	R-HSA-3301854	GC-NL	Nuclear Pore Complex (NPC) Disassembly	-2.1	4	3.4	30286	35	1076	5	0.46	0.21	983|7175|8086|8480|53371	CDK1|TPR|AAAS|RAE1|NUP54	-1.4
Reactome Gene Sets	6	R-HSA-8956320	GASTRITIS	Nucleotide biosynthesis	-2.4	9	4.7	30286	14	724	3	0.41	0.24	790|1723|3615	CAD|DHODH|IMPDH2	-2
Reactome Gene Sets	6	R-HSA-8956320	GC-NL	Nucleotide biosynthesis	-2.9	8	5.1	30286	14	1076	4	0.37	0.19	790|1723|3614|3615	CAD|DHODH|IMPDH1|IMPDH2	-2
Reactome Gene Sets	6	R-HSA-5696398	EGC-L	Nucleotide Excision Repair	-5.8	3.9	6.2	30286	109	1217	17	1.4	0.34	142|5111|5424|5425|5434|5982|5984|6117|6119|6917|7329|7515|7874|8607|27339|54107|79913	PARP1|PCNA|POLD1|POLD2|POLR2E|RFC2|RFC4|RPA1|RPA3|TCEA1|UBE2I|XRCC1|USP7|RUVBL1|PRPF19|POLE3|ACTR5	-4.8
Reactome Gene Sets	6	R-HSA-5696398	GC-NL	Nucleotide Excision Repair	-2.8	2.8	3.7	30286	109	1076	11	1	0.31	142|5111|5424|5434|5981|5982|5984|6233|7329|51138|54107	PARP1|PCNA|POLD1|POLR2E|RFC1|RFC2|RFC4|RPS27A|UBE2I|COPS4|POLE3	-1.9
Reactome Gene Sets	6	R-HSA-8956321	EGC-L	Nucleotide salvage	-2.7	5.4	4.3	30286	23	1217	5	0.41	0.18	100|353|978|1633|7378	ADA|APRT|CDA|DCK|UPP1	-2.2
Reactome Gene Sets	6	R-HSA-8956321	IM-LGD-L	Nucleotide salvage	-2.2	5.2	3.8	30286	23	1012	4	0.4	0.2	100|271|978|1633	ADA|AMPD2|CDA|DCK	-1.8
Reactome Gene Sets	6	R-HSA-8956321	GC-NL	Nucleotide salvage	-2.1	4.9	3.6	30286	23	1076	4	0.37	0.19	100|978|1633|7378	ADA|CDA|DCK|UPP1	-1.4
Reactome Gene Sets	6	R-HSA-6802957	GC-NL	Oncogenic MAPK signaling	-3.1	3.4	4.1	30286	84	1076	10	0.93	0.29	1445|2243|2244|5037|7094|7450|8036|8546|8826|9061	CSK|FGA|FGB|PEBP1|TLN1|VWF|SHOC2|AP3B1|IQGAP1|PAPSS1	-2.1
Reactome Gene Sets	6	R-HSA-111885	EGC-L	Opioid Signalling	-2.4	2.7	3.4	30286	92	1217	10	0.82	0.26	156|2767|2776|2788|3838|5331|5577|5580|54331|55970	GRK2|GNA11|GNAQ|GNG7|KPNA2|PLCB3|PRKAR2B|PRKCD|GNG2|GNG12	-2
Reactome Gene Sets	6	R-HSA-68949	GASTRITIS	Orc1 removal from chromatin	-2.8	4.1	4.1	30286	71	724	7	0.97	0.36	4173|4175|5694|5695|5696|5699|5721	MCM4|MCM6|PSMB6|PSMB7|PSMB8|PSMB10|PSME2	-2.3
Reactome Gene Sets	6	R-HSA-68949	EGC-L	Orc1 removal from chromatin	-2.7	3.2	3.7	30286	71	1217	9	0.74	0.25	4171|4173|4174|4175|5696|5699|5704|5710|5721	MCM2|MCM4|MCM5|MCM6|PSMB8|PSMB10|PSMC4|PSMD4|PSME2	-2.2
Reactome Gene Sets	6	R-HSA-68949	IM-LGD-L	Orc1 removal from chromatin	-3.9	4.2	5	30286	71	1012	10	0.99	0.31	4171|4173|4174|4175|5687|5692|5696|5699|5710|5721	MCM2|MCM4|MCM5|MCM6|PSMA6|PSMB4|PSMB8|PSMB10|PSMD4|PSME2	-3.2
Reactome Gene Sets	6	R-HSA-1852241	EGC-L	Organelle biogenesis and maintenance	-11	3.4	8.4	30286	296	1217	40	3.3	0.51	378|506|513|514|515|521|522|539|983|2746|3054|3320|3418|4509|5048|5108|5577|6102|8834|10121|10382|10498|10575|10632|10651|10694|10989|22919|22948|25813|54927|55770|55902|60412|79718|81027|84303|84617|139322|203068	ARF4|ATP5F1B|ATP5F1D|ATP5F1E|ATP5PB|ATP5ME|ATP5PF|ATP5PO|CDK1|GLUD1|HCFC1|HSP90AA1|IDH2|ATP8|PAFAH1B1|PCM1|PRKAR2B|RP2|TMEM11|ACTR1A|TUBB4A|CARM1|CCT4|ATP5MG|MTX2|CCT8|IMMT|MAPRE1|CCT5|SAMM50|CHCHD3|EXOC2|ACSS2|EXOC4|TBL1XR1|TUBB1|CHCHD6|TUBB6|APOOL|TUBB	-9.2
Reactome Gene Sets	6	R-HSA-1852241	IM-LGD-L	Organelle biogenesis and maintenance	-8.2	3.2	7.2	30286	296	1012	32	3.2	0.55	506|513|514|515|521|522|539|3054|3313|3320|3418|4509|4580|6102|7019|8834|10498|10632|10651|10694|10989|22919|22948|25813|27109|54927|55770|60412|83658|84303|125988|139322	ATP5F1B|ATP5F1D|ATP5F1E|ATP5PB|ATP5ME|ATP5PF|ATP5PO|HCFC1|HSPA9|HSP90AA1|IDH2|ATP8|MTX1|RP2|TFAM|TMEM11|CARM1|ATP5MG|MTX2|CCT8|IMMT|MAPRE1|CCT5|SAMM50|DMAC2L|CHCHD3|EXOC2|EXOC4|DYNLRB1|CHCHD6|MICOS13|APOOL	-6.9
Reactome Gene Sets	6	R-HSA-1852241	GASTRITIS	Organelle biogenesis and maintenance	-6.1	3.3	6.1	30286	296	724	23	3.2	0.65	506|513|514|515|522|539|983|2746|3054|3320|3418|4509|5048|7019|10632|10651|10989|25813|27109|84303|84617|139322|203068	ATP5F1B|ATP5F1D|ATP5F1E|ATP5PB|ATP5PF|ATP5PO|CDK1|GLUD1|HCFC1|HSP90AA1|IDH2|ATP8|PAFAH1B1|TFAM|ATP5MG|MTX2|IMMT|SAMM50|DMAC2L|CHCHD6|TUBB6|APOOL|TUBB	-5
Reactome Gene Sets	6	R-HSA-1852241	GC-NL	Organelle biogenesis and maintenance	-6.5	2.9	6.1	30286	296	1076	30	2.8	0.5	506|513|514|515|521|522|539|983|2746|3054|3418|4509|5048|6102|6742|8834|10121|10498|10632|10651|10989|25813|27109|54927|55902|84303|84617|125988|139322|203068	ATP5F1B|ATP5F1D|ATP5F1E|ATP5PB|ATP5ME|ATP5PF|ATP5PO|CDK1|GLUD1|HCFC1|IDH2|ATP8|PAFAH1B1|RP2|SSBP1|TMEM11|ACTR1A|CARM1|ATP5MG|MTX2|IMMT|SAMM50|DMAC2L|CHCHD3|ACSS2|CHCHD6|TUBB6|MICOS13|APOOL|TUBB	-4.9
Reactome Gene Sets	6	R-HSA-428643	IM-LGD-L	Organic anion transporters	-2.2	7.5	4.2	30286	12	1012	3	0.3	0.17	1468|6576|8402	SLC25A10|SLC25A1|SLC25A11	-1.8
Reactome Gene Sets	6	R-HSA-449836	IM-LGD-NL	Other interleukin signaling	-2.6	11	5.4	30286	24	333	3	0.9	0.52	5657|6810|200081	PRTN3|STX4|TXLNA	-1.8
Reactome Gene Sets	6	R-HSA-449836	GC-NL	Other interleukin signaling	-2	4.7	3.5	30286	24	1076	4	0.37	0.19	3716|5657|6844|200081	JAK1|PRTN3|VAMP2|TXLNA	-1.3
Reactome Gene Sets	6	R-HSA-1234176	GC-L	Oxygen-dependent proline hydroxylation of Hypoxia-inducible Factor Alpha	-2.2	5.5	3.8	30286	66	336	4	1.2	0.59	5696|5699|5721|7323	PSMB8|PSMB10|PSME2|UBE2D3	-1.8
Reactome Gene Sets	6	R-HSA-1234176	GASTRITIS	Oxygen-dependent proline hydroxylation of Hypoxia-inducible Factor Alpha	-2.3	3.8	3.6	30286	66	724	6	0.83	0.34	5694|5695|5696|5699|5721|8994	PSMB6|PSMB7|PSMB8|PSMB10|PSME2|LIMD1	-1.9
Reactome Gene Sets	6	R-HSA-372708	GC-NL	p130Cas linkage to MAPK signaling for integrins	-2.8	7.5	4.8	30286	15	1076	4	0.37	0.19	2243|2244|7094|7450	FGA|FGB|TLN1|VWF	-1.9
Reactome Gene Sets	6	R-HSA-372708	EGC-L	p130Cas linkage to MAPK signaling for integrins	-2.6	6.6	4.5	30286	15	1217	4	0.33	0.16	2243|2244|3674|7094	FGA|FGB|ITGA2B|TLN1	-2.1
Reactome Gene Sets	6	R-HSA-372708	IM-LGD-L	p130Cas linkage to MAPK signaling for integrins	-2.9	8	5	30286	15	1012	4	0.4	0.2	2243|2244|3674|7450	FGA|FGB|ITGA2B|VWF	-2.4
Reactome Gene Sets	6	R-HSA-171007	IM-LGD-L	p38MAPK events	-2.1	6.9	4	30286	13	1012	3	0.3	0.17	4893|5603|5899	NRAS|MAPK13|RALB	-1.8
Reactome Gene Sets	6	R-HSA-69563	GASTRITIS	p53-Dependent G1 DNA Damage Response	-2.3	3.8	3.6	30286	66	724	6	0.83	0.34	472|5694|5695|5696|5699|5721	ATM|PSMB6|PSMB7|PSMB8|PSMB10|PSME2	-1.9
Reactome Gene Sets	6	R-HSA-69563	IM-LGD-L	p53-Dependent G1 DNA Damage Response	-2.2	3.2	3.3	30286	66	1012	7	0.69	0.26	472|5687|5692|5696|5699|5710|5721	ATM|PSMA6|PSMB4|PSMB8|PSMB10|PSMD4|PSME2	-1.8
Reactome Gene Sets	6	R-HSA-69580	GASTRITIS	p53-Dependent G1/S DNA damage checkpoint	-2.3	3.8	3.6	30286	66	724	6	0.83	0.34	472|5694|5695|5696|5699|5721	ATM|PSMB6|PSMB7|PSMB8|PSMB10|PSME2	-1.9
Reactome Gene Sets	6	R-HSA-69580	IM-LGD-L	p53-Dependent G1/S DNA damage checkpoint	-2.2	3.2	3.3	30286	66	1012	7	0.69	0.26	472|5687|5692|5696|5699|5710|5721	ATM|PSMA6|PSMB4|PSMB8|PSMB10|PSMD4|PSME2	-1.8
Reactome Gene Sets	6	R-HSA-69610	GASTRITIS	p53-Independent DNA Damage Response	-2.1	4	3.4	30286	52	724	5	0.69	0.31	5694|5695|5696|5699|5721	PSMB6|PSMB7|PSMB8|PSMB10|PSME2	-1.8
Reactome Gene Sets	6	R-HSA-69610	IM-LGD-L	p53-Independent DNA Damage Response	-2.1	3.5	3.3	30286	52	1012	6	0.59	0.24	5687|5692|5696|5699|5710|5721	PSMA6|PSMB4|PSMB8|PSMB10|PSMD4|PSME2	-1.8
Reactome Gene Sets	6	R-HSA-69613	GASTRITIS	p53-Independent G1/S DNA damage checkpoint	-2.1	4	3.4	30286	52	724	5	0.69	0.31	5694|5695|5696|5699|5721	PSMB6|PSMB7|PSMB8|PSMB10|PSME2	-1.8
Reactome Gene Sets	6	R-HSA-69613	IM-LGD-L	p53-Independent G1/S DNA damage checkpoint	-2.1	3.5	3.3	30286	52	1012	6	0.59	0.24	5687|5692|5696|5699|5710|5721	PSMA6|PSMB4|PSMB8|PSMB10|PSMD4|PSME2	-1.8
Reactome Gene Sets	6	R-HSA-6802955	GC-NL	Paradoxical activation of RAF signaling by kinase inactive BRAF	-2.9	4.2	4.2	30286	47	1076	7	0.65	0.25	1445|2243|2244|5037|7094|7450|8826	CSK|FGA|FGB|PEBP1|TLN1|VWF|IQGAP1	-2
Reactome Gene Sets	6	R-HSA-6802955	IM-LGD-L	Paradoxical activation of RAF signaling by kinase inactive BRAF	-2.3	3.8	3.6	30286	47	1012	6	0.59	0.24	1445|2243|2244|3674|4893|7450	CSK|FGA|FGB|ITGA2B|NRAS|VWF	-1.9
Reactome Gene Sets	6	R-HSA-9664407	GC-NL	Parasite infection	-3.7	4.3	4.9	30286	59	1076	9	0.84	0.28	4067|4627|7454|7456|7525|9844|10095|10552|10787	LYN|MYH9|WAS|WIPF1|YES1|ELMO1|ARPC1B|ARPC1A|NCKAP1	-2.6
Reactome Gene Sets	6	R-HSA-9664407	EGC-L	Parasite infection	-2	3	3.1	30286	59	1217	7	0.58	0.22	4067|4627|7456|10095|10552|10787|23191	LYN|MYH9|WIPF1|ARPC1B|ARPC1A|NCKAP1|CYFIP1	-1.7
Reactome Gene Sets	6	R-HSA-9824443	GC-NL	Parasitic Infection Pathways	-4.1	2.9	4.7	30286	164	1076	17	1.6	0.38	718|2788|3162|3326|3606|4067|4627|5336|7454|7456|7525|9844|10095|10552|10787|10910|29108	C3|GNG7|HMOX1|HSP90AB1|IL18|LYN|MYH9|PLCG2|WAS|WIPF1|YES1|ELMO1|ARPC1B|ARPC1A|NCKAP1|SUGT1|PYCARD	-2.9
Reactome Gene Sets	6	R-HSA-9824443	EGC-L	Parasitic Infection Pathways	-3.9	2.7	4.5	30286	164	1217	18	1.5	0.35	718|2778|2788|3326|3606|4067|4627|4907|5577|7456|10095|10552|10787|10910|23191|29108|54331|55970	C3|GNAS|GNG7|HSP90AB1|IL18|LYN|MYH9|NT5E|PRKAR2B|WIPF1|ARPC1B|ARPC1A|NCKAP1|SUGT1|CYFIP1|PYCARD|GNG2|GNG12	-3.2
Reactome Gene Sets	6	R-HSA-9824443	GASTRITIS	Parasitic Infection Pathways	-2.7	2.8	3.6	30286	164	724	11	1.5	0.45	3162|3326|4067|4907|5336|7456|8976|9844|10095|29108|79792	HMOX1|HSP90AB1|LYN|NT5E|PLCG2|WIPF1|WASL|ELMO1|ARPC1B|PYCARD|GSDMD	-2.2
Reactome Gene Sets	6	R-HSA-9824443	IM-LGD-L	Parasitic Infection Pathways	-3.4	2.7	4.1	30286	164	1012	15	1.5	0.38	718|834|2778|2783|3162|3606|4067|4790|7454|8976|10095|10109|10552|10910|29108	C3|CASP1|GNAS|GNB2|HMOX1|IL18|LYN|NFKB1|WAS|WASL|ARPC1B|ARPC2|ARPC1A|SUGT1|PYCARD	-2.8
Reactome Gene Sets	6	R-HSA-9824443	IM-LGD-NL	Parasitic Infection Pathways	-2	3.3	3.2	30286	164	333	6	1.8	0.73	3326|5336|7454|7456|29108|55970	HSP90AB1|PLCG2|WAS|WIPF1|PYCARD|GNG12	-1.3
Reactome Gene Sets	6	R-HSA-167290	EGC-L	Pausing and recovery of HIV elongation	-4.4	6	5.9	30286	33	1217	8	0.66	0.23	2962|2963|5434|6749|6829|6917|6923|11198	GTF2F1|GTF2F2|POLR2E|SSRP1|SUPT5H|TCEA1|ELOB|SUPT16H	-3.6
Reactome Gene Sets	6	R-HSA-167290	GASTRITIS	Pausing and recovery of HIV elongation	-3	6.3	4.8	30286	33	724	5	0.69	0.31	2963|6749|6827|11198|25920	GTF2F2|SSRP1|SUPT4H1|SUPT16H|NELFB	-2.4
Reactome Gene Sets	6	R-HSA-167290	GC-NL	Pausing and recovery of HIV elongation	-3	5.1	4.5	30286	33	1076	6	0.56	0.23	2962|2963|5434|6749|11198|25920	GTF2F1|GTF2F2|POLR2E|SSRP1|SUPT16H|NELFB	-2.1
Reactome Gene Sets	6	R-HSA-167290	IM-LGD-L	Pausing and recovery of HIV elongation	-2.3	4.5	3.8	30286	33	1012	5	0.49	0.22	2962|2963|5434|6749|6829	GTF2F1|GTF2F2|POLR2E|SSRP1|SUPT5H	-1.9
Reactome Gene Sets	6	R-HSA-167238	EGC-L	Pausing and recovery of Tat-mediated HIV elongation	-4.6	6.4	6.2	30286	31	1217	8	0.66	0.23	2962|2963|5434|6749|6829|6917|6923|11198	GTF2F1|GTF2F2|POLR2E|SSRP1|SUPT5H|TCEA1|ELOB|SUPT16H	-3.8
Reactome Gene Sets	6	R-HSA-167238	GC-NL	Pausing and recovery of Tat-mediated HIV elongation	-3.2	5.4	4.8	30286	31	1076	6	0.56	0.23	2962|2963|5434|6749|11198|25920	GTF2F1|GTF2F2|POLR2E|SSRP1|SUPT16H|NELFB	-2.2
Reactome Gene Sets	6	R-HSA-167238	GASTRITIS	Pausing and recovery of Tat-mediated HIV elongation	-3.1	6.7	5	30286	31	724	5	0.69	0.31	2963|6749|6827|11198|25920	GTF2F2|SSRP1|SUPT4H1|SUPT16H|NELFB	-2.5
Reactome Gene Sets	6	R-HSA-167238	IM-LGD-L	Pausing and recovery of Tat-mediated HIV elongation	-2.5	4.8	4	30286	31	1012	5	0.49	0.22	2962|2963|5434|6749|6829	GTF2F1|GTF2F2|POLR2E|SSRP1|SUPT5H	-2
Reactome Gene Sets	6	R-HSA-5651801	EGC-L	PCNA-Dependent Long Patch Base Excision Repair	-7.3	11	9.1	30286	21	1217	9	0.74	0.25	2237|5111|5424|5425|5982|5984|6117|6119|54107	FEN1|PCNA|POLD1|POLD2|RFC2|RFC4|RPA1|RPA3|POLE3	-6.1
Reactome Gene Sets	6	R-HSA-5651801	GC-NL	PCNA-Dependent Long Patch Base Excision Repair	-5.3	9.4	7.4	30286	21	1076	7	0.65	0.25	2237|5111|5424|5981|5982|5984|54107	FEN1|PCNA|POLD1|RFC1|RFC2|RFC4|POLE3	-3.9
Reactome Gene Sets	6	R-HSA-5651801	GASTRITIS	PCNA-Dependent Long Patch Base Excision Repair	-3.9	10	6.4	30286	21	724	5	0.69	0.31	2237|5111|5424|5982|6117	FEN1|PCNA|POLD1|RFC2|RPA1	-3.2
Reactome Gene Sets	6	R-HSA-5651801	IM-LGD-L	PCNA-Dependent Long Patch Base Excision Repair	-3.3	7.1	5.2	30286	21	1012	5	0.49	0.22	5111|5424|5425|5982|6118	PCNA|POLD1|POLD2|RFC2|RPA2	-2.7
Reactome Gene Sets	6	R-HSA-4086400	GASTRITIS	PCP/CE pathway	-2.2	3.2	3.3	30286	92	724	7	0.97	0.36	5694|5695|5696|5699|5721|5880|23513	PSMB6|PSMB7|PSMB8|PSMB10|PSME2|RAC2|SCRIB	-1.8
Reactome Gene Sets	6	R-HSA-4086400	IM-LGD-L	PCP/CE pathway	-2.4	2.9	3.4	30286	92	1012	9	0.89	0.3	5216|5687|5692|5696|5699|5710|5721|5880|23513	PFN1|PSMA6|PSMB4|PSMB8|PSMB10|PSMD4|PSME2|RAC2|SCRIB	-2
Reactome Gene Sets	6	R-HSA-389948	GASTRITIS	PD-1 signaling	-3.7	9.1	6.1	30286	23	724	5	0.69	0.31	1445|3115|3122|3123|5777	CSK|HLA-DPB1|HLA-DRA|HLA-DRB1|PTPN6	-3.1
Reactome Gene Sets	6	R-HSA-389948	GC-L	PD-1 signaling	-2.7	12	5.5	30286	23	336	3	0.89	0.51	3115|3122|5777	HLA-DPB1|HLA-DRA|PTPN6	-2.2
Reactome Gene Sets	6	R-HSA-389948	GC-NL	PD-1 signaling	-3	6.1	4.7	30286	23	1076	5	0.46	0.21	1445|3115|3122|3127|5777	CSK|HLA-DPB1|HLA-DRA|HLA-DRB5|PTPN6	-2
Reactome Gene Sets	6	R-HSA-389948	IM-LGD-L	PD-1 signaling	-2.2	5.2	3.8	30286	23	1012	4	0.4	0.2	1445|3115|3122|5777	CSK|HLA-DPB1|HLA-DRA|PTPN6	-1.8
Reactome Gene Sets	6	R-HSA-389948	IM-LGD-NL	PD-1 signaling	-4	16	7.5	30286	23	333	4	1.2	0.6	1445|3115|3122|5777	CSK|HLA-DPB1|HLA-DRA|PTPN6	-2.8
Reactome Gene Sets	6	R-HSA-210990	GC-NL	PECAM1 interactions	-3.2	9.4	5.6	30286	12	1076	4	0.37	0.19	3685|4067|5777|7525	ITGAV|LYN|PTPN6|YES1	-2.2
Reactome Gene Sets	6	R-HSA-71336	EGC-L	Pentose phosphate pathway	-2.6	6.6	4.5	30286	15	1217	4	0.33	0.16	5226|5634|6888|55276	PGD|PRPS2|TALDO1|PGM2	-2.1
Reactome Gene Sets	6	R-HSA-156902	EGC-L	Peptide chain elongation	-4.2	3.6	5	30286	90	1217	13	1.1	0.29	1938|4736|6122|6134|6135|6136|6139|6146|6188|6193|6210|6231|23521	EEF2|RPL10A|RPL3|RPL10|RPL11|RPL12|RPL17|RPL22|RPS3|RPS5|RPS15A|RPS26|RPL13A	-3.4
Reactome Gene Sets	6	R-HSA-156902	GC-NL	Peptide chain elongation	-4.1	3.8	5	30286	90	1076	12	1.1	0.32	2197|4736|6146|6169|6170|6193|6209|6210|6233|6235|9349|23521	FAU|RPL10A|RPL22|RPL38|RPL39|RPS5|RPS15|RPS15A|RPS27A|RPS29|RPL23|RPL13A	-2.9
Reactome Gene Sets	6	R-HSA-2980736	EGC-NL	Peptide hormone metabolism	-2.3	8.6	4.5	30286	88	120	3	2.5	1.4	290|1522|60412	ANPEP|CTSZ|EXOC4	-1.5
Reactome Gene Sets	6	R-HSA-2980736	EGC-L	Peptide hormone metabolism	-2.6	2.8	3.5	30286	88	1217	10	0.82	0.26	290|1522|6844|9789|23478|55770|56605|60412|60559|90701	ANPEP|CTSZ|VAMP2|SPCS2|SEC11A|EXOC2|ERO1B|EXOC4|SPCS3|SEC11C	-2.1
Reactome Gene Sets	6	R-HSA-381042	EGC-L	PERK regulates gene expression	-5.5	7	6.9	30286	32	1217	9	0.74	0.25	1968|8570|8894|11340|51010|51013|54512|56915|118460	EIF2S3|KHSRP|EIF2S2|EXOSC8|EXOSC3|EXOSC1|EXOSC4|EXOSC5|EXOSC6	-4.5
Reactome Gene Sets	6	R-HSA-9033241	GC-NL	Peroxisomal protein import	-2.8	3.6	3.9	30286	63	1076	8	0.74	0.26	1384|1891|3155|3416|6233|8540|10455|390916	CRAT|ECH1|HMGCL|IDE|RPS27A|AGPS|ECI2|NUDT19	-1.9
Reactome Gene Sets	6	R-HSA-211945	GASTRITIS	Phase I - Functionalization of compounds	-3.6	3.9	4.8	30286	106	724	10	1.4	0.43	26|130|216|217|1727|2328|3326|4128|9049|10728	AOC1|ADH6|ALDH1A1|ALDH2|CYB5R3|FMO3|HSP90AB1|MAOA|AIP|PTGES3	-3
Reactome Gene Sets	6	R-HSA-211945	GC-NL	Phase I - Functionalization of compounds	-4.6	3.7	5.4	30286	106	1076	14	1.3	0.35	26|126|216|218|1727|2230|2328|3326|4128|9049|29785|54996|55902|134147	AOC1|ADH1C|ALDH1A1|ALDH3A1|CYB5R3|FDX1|FMO3|HSP90AB1|MAOA|AIP|CYP2S1|MTARC2|ACSS2|CMBL	-3.3
Reactome Gene Sets	6	R-HSA-211945	EGC-L	Phase I - Functionalization of compounds	-4	3.3	4.8	30286	106	1217	14	1.2	0.31	125|126|216|1727|2052|2328|3326|4128|9049|10728|29785|54996|55902|134147	ADH1B|ADH1C|ALDH1A1|CYB5R3|EPHX1|FMO3|HSP90AB1|MAOA|AIP|PTGES3|CYP2S1|MTARC2|ACSS2|CMBL	-3.3
Reactome Gene Sets	6	R-HSA-211945	IM-LGD-L	Phase I - Functionalization of compounds	-3.7	3.4	4.6	30286	106	1012	12	1.2	0.34	26|125|216|219|1727|2052|2230|4128|8824|9049|10728|54996	AOC1|ADH1B|ALDH1A1|ALDH1B1|CYB5R3|EPHX1|FDX1|MAOA|CES2|AIP|PTGES3|MTARC2	-3
Reactome Gene Sets	6	R-HSA-211945	IM-LGD-NL	Phase I - Functionalization of compounds	-4.6	6.9	6.4	30286	106	333	8	2.4	0.84	130|216|1727|2328|3326|4128|10728|54996	ADH6|ALDH1A1|CYB5R3|FMO3|HSP90AB1|MAOA|PTGES3|MTARC2	-3.3
Reactome Gene Sets	6	R-HSA-211945	EGC-NL	Phase I - Functionalization of compounds	-2.1	7.1	4	30286	106	120	3	2.5	1.4	127|2328|134147	ADH4|FMO3|CMBL	-1.3
Reactome Gene Sets	6	R-HSA-156580	EGC-L	Phase II - Conjugation of compounds	-3.4	3	4.2	30286	109	1217	13	1.1	0.29	191|2940|4144|4257|4258|4259|6822|7360|9060|27284|51504|55748|79017	AHCY|GSTA3|MAT2A|MGST1|MGST2|MGST3|SULT2A1|UGP2|PAPSS2|SULT1B1|TRMT112|CNDP2|GGCT	-2.7
Reactome Gene Sets	6	R-HSA-156580	GC-NL	Phase II - Conjugation of compounds	-2.8	2.8	3.7	30286	109	1076	11	1	0.31	1312|4257|4259|6817|6822|7172|9060|9061|27284|51504|55748	COMT|MGST1|MGST3|SULT1A1|SULT2A1|TPMT|PAPSS2|PAPSS1|SULT1B1|TRMT112|CNDP2	-1.9
Reactome Gene Sets	6	R-HSA-8963691	GASTRITIS	Phenylalanine and tyrosine metabolism	-2.7	11	5.4	30286	11	724	3	0.41	0.24	3081|80150|259307	HGD|ASRGL1|IL4I1	-2.2
Reactome Gene Sets	6	R-HSA-1483257	IM-LGD-L	Phospholipid metabolism	-3.5	2.5	4.2	30286	212	1012	18	1.8	0.42	1120|2819|2820|3030|3032|5130|5297|5868|8821|8904|10809|23646|27132|55326|55361|55697|79887|100137049	CHKB|GPD1|GPD2|HADHA|HADHB|PCYT1A|PI4KA|RAB5A|INPP4B|CPNE1|STARD10|PLD3|CPNE7|AGPAT5|PI4K2A|VAC14|PLBD1|PLA2G4B	-2.9
Reactome Gene Sets	6	R-HSA-1483257	IM-LGD-NL	Phospholipid metabolism	-2	3	3.1	30286	212	333	7	2.1	0.79	1120|2820|5298|5867|27132|55361|100137049	CHKB|GPD2|PI4KB|RAB4A|CPNE7|PI4K2A|PLA2G4B	-1.3
Reactome Gene Sets	6	R-HSA-1483257	GC-NL	Phospholipid metabolism	-2.4	2.1	3.2	30286	212	1076	16	1.5	0.37	1120|2819|2820|3030|3032|4534|5289|5297|5833|5867|8776|8904|10809|23171|55697|100137049	CHKB|GPD1|GPD2|HADHA|HADHB|MTM1|PIK3C3|PI4KA|PCYT2|RAB4A|MTMR1|CPNE1|STARD10|GPD1L|VAC14|PLA2G4B	-1.6
Reactome Gene Sets	6	R-HSA-202427	GASTRITIS	Phosphorylation of CD3 and TCR zeta chains	-3.8	9.5	6.2	30286	22	724	5	0.69	0.31	1445|3115|3122|3123|5788	CSK|HLA-DPB1|HLA-DRA|HLA-DRB1|PTPRC	-3.1
Reactome Gene Sets	6	R-HSA-202427	GC-NL	Phosphorylation of CD3 and TCR zeta chains	-3	6.4	4.9	30286	22	1076	5	0.46	0.21	1445|3115|3122|3127|5788	CSK|HLA-DPB1|HLA-DRA|HLA-DRB5|PTPRC	-2.1
Reactome Gene Sets	6	R-HSA-202427	IM-LGD-L	Phosphorylation of CD3 and TCR zeta chains	-2.3	5.4	3.9	30286	22	1012	4	0.4	0.2	1445|3115|3122|5788	CSK|HLA-DPB1|HLA-DRA|PTPRC	-1.9
Reactome Gene Sets	6	R-HSA-202427	IM-LGD-NL	Phosphorylation of CD3 and TCR zeta chains	-4	17	7.7	30286	22	333	4	1.2	0.6	1445|3115|3122|5788	CSK|HLA-DPB1|HLA-DRA|PTPRC	-2.9
Reactome Gene Sets	6	R-HSA-5205685	GC-L	PINK1-PRKN Mediated Mitophagy	-2.7	12	5.6	30286	22	336	3	0.89	0.51	7416|8878|9927	VDAC1|SQSTM1|MFN2	-2.3
Reactome Gene Sets	6	R-HSA-5205685	IM-LGD-L	PINK1-PRKN Mediated Mitophagy	-3.2	6.8	5.1	30286	22	1012	5	0.49	0.22	7416|8878|9868|9927|56993	VDAC1|SQSTM1|TOMM70|MFN2|TOMM22	-2.6
Reactome Gene Sets	6	R-HSA-5205685	GC-NL	PINK1-PRKN Mediated Mitophagy	-2.2	5.1	3.7	30286	22	1076	4	0.37	0.19	6233|7416|9927|56993	RPS27A|VDAC1|MFN2|TOMM22	-1.4
Reactome Gene Sets	6	R-HSA-9833482	EGC-L	PKR-mediated signaling	-4.4	4	5.3	30286	75	1217	12	0.99	0.28	103|983|1660|1968|3312|3608|5611|7329|8894|10382|81027|84617	ADAR|CDK1|DHX9|EIF2S3|HSPA8|ILF2|DNAJC3|UBE2I|EIF2S2|TUBB4A|TUBB1|TUBB6	-3.6
Reactome Gene Sets	6	R-HSA-8963898	EGC-L	Plasma lipoprotein assembly	-6.5	10	8.5	30286	19	1217	8	0.66	0.23	2|335|337|338|341|344|345|348	A2M|APOA1|APOA4|APOB|APOC1|APOC2|APOC3|APOE	-5.4
Reactome Gene Sets	6	R-HSA-8963898	GC-NL	Plasma lipoprotein assembly	-4.4	8.9	6.6	30286	19	1076	6	0.56	0.23	2|338|341|344|345|348	A2M|APOB|APOC1|APOC2|APOC3|APOE	-3.2
Reactome Gene Sets	6	R-HSA-8963898	IM-LGD-L	Plasma lipoprotein assembly	-8.5	14	11	30286	19	1012	9	0.89	0.3	2|335|336|337|338|341|344|345|348	A2M|APOA1|APOA2|APOA4|APOB|APOC1|APOC2|APOC3|APOE	-7.2
Reactome Gene Sets	6	R-HSA-174824	IM-LGD-L	Plasma lipoprotein assembly, remodeling, and clearance	-3.7	4	4.8	30286	75	1012	10	0.99	0.31	2|335|336|337|338|341|344|345|348|55911	A2M|APOA1|APOA2|APOA4|APOB|APOC1|APOC2|APOC3|APOE|APOBR	-3
Reactome Gene Sets	6	R-HSA-174824	GC-NL	Plasma lipoprotein assembly, remodeling, and clearance	-3.5	3.8	4.6	30286	75	1076	10	0.93	0.29	2|338|341|344|345|348|1173|1213|6233|55911	A2M|APOB|APOC1|APOC2|APOC3|APOE|AP2M1|CLTC|RPS27A|APOBR	-2.4
Reactome Gene Sets	6	R-HSA-174824	EGC-L	Plasma lipoprotein assembly, remodeling, and clearance	-3.1	3.3	4.1	30286	75	1217	10	0.82	0.26	2|335|337|338|341|344|345|348|1173|55911	A2M|APOA1|APOA4|APOB|APOC1|APOC2|APOC3|APOE|AP2M1|APOBR	-2.5
Reactome Gene Sets	6	R-HSA-8964043	GC-NL	Plasma lipoprotein clearance	-3.5	5.3	5.1	30286	37	1076	7	0.65	0.25	338|341|348|1173|1213|6233|55911	APOB|APOC1|APOE|AP2M1|CLTC|RPS27A|APOBR	-2.5
Reactome Gene Sets	6	R-HSA-8964043	GC-L	Plasma lipoprotein clearance	-2.1	7.3	4.1	30286	37	336	3	0.89	0.51	341|348|55911	APOC1|APOE|APOBR	-1.8
Reactome Gene Sets	6	R-HSA-8964043	EGC-L	Plasma lipoprotein clearance	-2.5	4	3.8	30286	37	1217	6	0.49	0.2	335|338|341|348|1173|55911	APOA1|APOB|APOC1|APOE|AP2M1|APOBR	-2
Reactome Gene Sets	6	R-HSA-8964043	IM-LGD-L	Plasma lipoprotein clearance	-2.1	4	3.4	30286	37	1012	5	0.49	0.22	335|338|341|348|55911	APOA1|APOB|APOC1|APOE|APOBR	-1.8
Reactome Gene Sets	6	R-HSA-8963899	IM-LGD-L	Plasma lipoprotein remodeling	-4	6.2	5.6	30286	34	1012	7	0.69	0.26	335|336|337|338|344|345|348	APOA1|APOA2|APOA4|APOB|APOC2|APOC3|APOE	-3.2
Reactome Gene Sets	6	R-HSA-8963899	EGC-L	Plasma lipoprotein remodeling	-2.7	4.4	4	30286	34	1217	6	0.49	0.2	335|337|338|344|345|348	APOA1|APOA4|APOB|APOC2|APOC3|APOE	-2.2
Reactome Gene Sets	6	R-HSA-76002	EGC-L	Platelet activation, signaling and aggregation	-13	3.9	9.6	30286	263	1217	41	3.4	0.52	1|2|226|335|388|710|1277|1445|1606|2162|2243|2244|2767|2776|2788|3273|3674|3699|3937|4067|5216|5340|5473|5580|5627|5768|5770|5777|5880|6678|7018|7057|7094|7534|51097|51706|54331|54495|55970|83706|139322	A1BG|A2M|ALDOA|APOA1|RHOB|SERPING1|COL1A1|CSK|DGKA|F13A1|FGA|FGB|GNA11|GNAQ|GNG7|HRG|ITGA2B|ITIH3|LCP2|LYN|PFN1|PLG|PPBP|PRKCD|PROS1|QSOX1|PTPN1|PTPN6|RAC2|SPARC|TF|THBS1|TLN1|YWHAZ|SCCPDH|CYB5R1|GNG2|TMX3|GNG12|FERMT3|APOOL	-11
Reactome Gene Sets	6	R-HSA-76002	GC-NL	Platelet activation, signaling and aggregation	-12	4	9.3	30286	263	1076	37	3.4	0.56	1|2|391|710|1445|1606|1893|2147|2243|2244|2316|2776|2788|3273|3699|3937|4067|5004|5265|5336|5340|5341|5473|5580|5627|5768|5770|5777|5880|6678|7057|7094|7450|51097|51706|83706|139322	A1BG|A2M|RHOG|SERPING1|CSK|DGKA|ECM1|F2|FGA|FGB|FLNA|GNAQ|GNG7|HRG|ITIH3|LCP2|LYN|ORM1|SERPINA1|PLCG2|PLG|PLEK|PPBP|PRKCD|PROS1|QSOX1|PTPN1|PTPN6|RAC2|SPARC|THBS1|TLN1|VWF|SCCPDH|CYB5R1|FERMT3|APOOL	-10
Reactome Gene Sets	6	R-HSA-76002	GC-L	Platelet activation, signaling and aggregation	-3.7	3.8	4.8	30286	263	336	11	3.3	0.97	2767|3937|5341|5770|5777|6678|7450|7873|51097|51706|139322	GNA11|LCP2|PLEK|PTPN1|PTPN6|SPARC|VWF|MANF|SCCPDH|CYB5R1|APOOL	-3
Reactome Gene Sets	6	R-HSA-76002	GASTRITIS	Platelet activation, signaling and aggregation	-5.8	3.3	6	30286	263	724	21	2.9	0.62	391|1445|1606|2162|2776|3309|3937|4067|5005|5267|5336|5341|5770|5777|5880|7094|7450|7873|51706|83706|139322	RHOG|CSK|DGKA|F13A1|GNAQ|HSPA5|LCP2|LYN|ORM2|SERPINA4|PLCG2|PLEK|PTPN1|PTPN6|RAC2|TLN1|VWF|MANF|CYB5R1|FERMT3|APOOL	-4.8
Reactome Gene Sets	6	R-HSA-76002	IM-LGD-NL	Platelet activation, signaling and aggregation	-7.4	5.5	7.8	30286	263	333	16	4.8	1.2	1445|1606|2767|2776|3699|5336|5777|5880|6810|7057|7094|7450|51097|51706|55970|83706	CSK|DGKA|GNA11|GNAQ|ITIH3|PLCG2|PTPN6|RAC2|STX4|THBS1|TLN1|VWF|SCCPDH|CYB5R1|GNG12|FERMT3	-5.6
Reactome Gene Sets	6	R-HSA-76002	IM-LGD-L	Platelet activation, signaling and aggregation	-16	4.7	11	30286	263	1012	41	4.1	0.62	1|2|12|197|335|710|1072|1191|1445|1606|1893|2147|2243|2244|2776|2783|3273|3674|3699|4067|5004|5005|5216|5265|5340|5473|5627|5777|5880|7018|7057|7076|7450|7873|10447|23052|51097|51706|57406|83706|139322	A1BG|A2M|SERPINA3|AHSG|APOA1|SERPING1|CFL1|CLU|CSK|DGKA|ECM1|F2|FGA|FGB|GNAQ|GNB2|HRG|ITGA2B|ITIH3|LYN|ORM1|ORM2|PFN1|SERPINA1|PLG|PPBP|PROS1|PTPN6|RAC2|TF|THBS1|TIMP1|VWF|MANF|FAM3C|ENDOD1|SCCPDH|CYB5R1|ABHD6|FERMT3|APOOL	-14
Reactome Gene Sets	6	R-HSA-75892	IM-LGD-L	Platelet Adhesion to exposed collagen	-2.8	7.5	4.8	30286	16	1012	4	0.4	0.2	3672|3673|4067|7450	ITGA1|ITGA2|LYN|VWF	-2.3
Reactome Gene Sets	6	R-HSA-76009	GC-NL	Platelet Aggregation (Plug Formation)	-3.4	5.1	4.9	30286	39	1076	7	0.65	0.25	1445|2147|2243|2244|5770|7094|7450	CSK|F2|FGA|FGB|PTPN1|TLN1|VWF	-2.4
Reactome Gene Sets	6	R-HSA-76009	EGC-L	Platelet Aggregation (Plug Formation)	-3.1	4.5	4.4	30286	39	1217	7	0.58	0.22	1277|1445|2243|2244|3674|5770|7094	COL1A1|CSK|FGA|FGB|ITGA2B|PTPN1|TLN1	-2.5
Reactome Gene Sets	6	R-HSA-76009	IM-LGD-L	Platelet Aggregation (Plug Formation)	-2.8	4.6	4.2	30286	39	1012	6	0.59	0.24	1445|2147|2243|2244|3674|7450	CSK|F2|FGA|FGB|ITGA2B|VWF	-2.3
Reactome Gene Sets	6	R-HSA-76009	IM-LGD-NL	Platelet Aggregation (Plug Formation)	-2	7	4	30286	39	333	3	0.9	0.52	1445|7094|7450	CSK|TLN1|VWF	-1.3
Reactome Gene Sets	6	R-HSA-114608	GC-NL	Platelet degranulation	-11	5.2	9.3	30286	129	1076	24	2.2	0.45	1|2|710|1893|2243|2244|2316|3273|3699|5004|5265|5340|5341|5473|5627|5768|6678|7057|7094|7450|51097|51706|83706|139322	A1BG|A2M|SERPING1|ECM1|FGA|FGB|FLNA|HRG|ITIH3|ORM1|SERPINA1|PLG|PLEK|PPBP|PROS1|QSOX1|SPARC|THBS1|TLN1|VWF|SCCPDH|CYB5R1|FERMT3|APOOL	-8.7
Reactome Gene Sets	6	R-HSA-114608	EGC-L	Platelet degranulation	-10	4.8	8.9	30286	129	1217	25	2.1	0.41	1|2|226|335|710|2162|2243|2244|3273|3674|3699|5216|5340|5473|5627|5768|6678|7018|7057|7094|51097|51706|54495|83706|139322	A1BG|A2M|ALDOA|APOA1|SERPING1|F13A1|FGA|FGB|HRG|ITGA2B|ITIH3|PFN1|PLG|PPBP|PROS1|QSOX1|SPARC|TF|THBS1|TLN1|SCCPDH|CYB5R1|TMX3|FERMT3|APOOL	-8.8
Reactome Gene Sets	6	R-HSA-114608	GC-L	Platelet degranulation	-3.2	4.9	4.7	30286	129	336	7	2.1	0.78	5341|6678|7450|7873|51097|51706|139322	PLEK|SPARC|VWF|MANF|SCCPDH|CYB5R1|APOOL	-2.6
Reactome Gene Sets	6	R-HSA-114608	GASTRITIS	Platelet degranulation	-3.6	3.6	4.6	30286	129	724	11	1.5	0.45	2162|3309|5005|5267|5341|7094|7450|7873|51706|83706|139322	F13A1|HSPA5|ORM2|SERPINA4|PLEK|TLN1|VWF|MANF|CYB5R1|FERMT3|APOOL	-2.9
Reactome Gene Sets	6	R-HSA-114608	IM-LGD-NL	Platelet degranulation	-3.2	4.9	4.7	30286	129	333	7	2.1	0.79	3699|7057|7094|7450|51097|51706|83706	ITIH3|THBS1|TLN1|VWF|SCCPDH|CYB5R1|FERMT3	-2.2
Reactome Gene Sets	6	R-HSA-114608	IM-LGD-L	Platelet degranulation	-18	7.4	14	30286	129	1012	32	3.2	0.55	1|2|12|197|335|710|1072|1191|1893|2243|2244|3273|3674|3699|5004|5005|5216|5265|5340|5473|5627|7018|7057|7076|7450|7873|10447|23052|51097|51706|83706|139322	A1BG|A2M|SERPINA3|AHSG|APOA1|SERPING1|CFL1|CLU|ECM1|FGA|FGB|HRG|ITGA2B|ITIH3|ORM1|ORM2|PFN1|SERPINA1|PLG|PPBP|PROS1|TF|THBS1|TIMP1|VWF|MANF|FAM3C|ENDOD1|SCCPDH|CYB5R1|FERMT3|APOOL	-17
Reactome Gene Sets	6	R-HSA-112043	EGC-L	PLC beta mediated events	-2.4	3.4	3.5	30286	51	1217	7	0.58	0.22	156|2767|2776|3838|5331|5577|5580	GRK2|GNA11|GNAQ|KPNA2|PLCB3|PRKAR2B|PRKCD	-2
Reactome Gene Sets	6	R-HSA-69091	GC-NL	Polymerase switching	-4.1	10	6.5	30286	14	1076	5	0.46	0.21	5111|5424|5981|5982|5984	PCNA|POLD1|RFC1|RFC2|RFC4	-2.9
Reactome Gene Sets	6	R-HSA-69091	GASTRITIS	Polymerase switching	-2.4	9	4.7	30286	14	724	3	0.41	0.24	5111|5424|5982	PCNA|POLD1|RFC2	-2
Reactome Gene Sets	6	R-HSA-69091	IM-LGD-L	Polymerase switching	-3	8.6	5.3	30286	14	1012	4	0.4	0.2	5111|5424|5425|5982	PCNA|POLD1|POLD2|RFC2	-2.5
Reactome Gene Sets	6	R-HSA-69091	EGC-L	Polymerase switching	-3.8	8.9	6	30286	14	1217	5	0.41	0.18	5111|5424|5425|5982|5984	PCNA|POLD1|POLD2|RFC2|RFC4	-3.1
Reactome Gene Sets	6	R-HSA-174411	GC-NL	Polymerase switching on the C-strand of the telomere	-3.6	6.5	5.4	30286	26	1076	6	0.56	0.23	5111|5424|5981|5982|5984|54386	PCNA|POLD1|RFC1|RFC2|RFC4|TERF2IP	-2.5
Reactome Gene Sets	6	R-HSA-174411	GASTRITIS	Polymerase switching on the C-strand of the telomere	-2.5	6.4	4.3	30286	26	724	4	0.55	0.28	5111|5424|5982|54386	PCNA|POLD1|RFC2|TERF2IP	-2.1
Reactome Gene Sets	6	R-HSA-174411	IM-LGD-L	Polymerase switching on the C-strand of the telomere	-2.8	5.8	4.5	30286	26	1012	5	0.49	0.22	5111|5424|5425|5982|54386	PCNA|POLD1|POLD2|RFC2|TERF2IP	-2.3
Reactome Gene Sets	6	R-HSA-174411	EGC-L	Polymerase switching on the C-strand of the telomere	-3.3	5.7	5	30286	26	1217	6	0.49	0.2	5111|5424|5425|5982|5984|54386	PCNA|POLD1|POLD2|RFC2|RFC4|TERF2IP	-2.7
Reactome Gene Sets	6	R-HSA-9615933	EGC-L	Postmitotic nuclear pore complex (NPC) reformation	-3.2	5.5	4.8	30286	27	1217	6	0.49	0.2	1104|3837|5901|5905|7329|53371	RCC1|KPNB1|RAN|RANGAP1|UBE2I|NUP54	-2.6
Reactome Gene Sets	6	R-HSA-8957275	IM-LGD-L	Post-translational protein phosphorylation	-7.7	5	7.7	30286	108	1012	18	1.8	0.42	197|335|336|338|348|718|721|1356|2243|2519|3053|3698|5265|7018|7076|7184|8542|10970	AHSG|APOA1|APOA2|APOB|APOE|C3|C4B|CP|FGA|FUCA2|SERPIND1|ITIH2|SERPINA1|TF|TIMP1|HSP90B1|APOL1|CKAP4	-6.5
Reactome Gene Sets	6	R-HSA-8957275	EGC-L	Post-translational protein phosphorylation	-4.6	3.5	5.2	30286	108	1217	15	1.2	0.32	335|338|348|718|1356|1471|2243|2519|3698|4052|5611|5768|7018|10970|375056	APOA1|APOB|APOE|C3|CP|CST3|FGA|FUCA2|ITIH2|LTBP1|DNAJC3|QSOX1|TF|CKAP4|MIA3	-3.7
Reactome Gene Sets	6	R-HSA-8957275	GC-NL	Post-translational protein phosphorylation	-3.3	3.1	4.3	30286	108	1076	12	1.1	0.32	338|348|718|1356|1471|2200|2243|2519|3698|4052|5265|5768	APOB|APOE|C3|CP|CST3|FBN1|FGA|FUCA2|ITIH2|LTBP1|SERPINA1|QSOX1	-2.3
Reactome Gene Sets	6	R-HSA-9679191	EGC-L	Potential therapeutics for SARS	-3.8	3.3	4.6	30286	99	1217	13	1.1	0.29	1173|2288|3320|3326|3615|5931|9219|10728|23186|30011|54815|57459|203068	AP2M1|FKBP4|HSP90AA1|HSP90AB1|IMPDH2|RBBP7|MTA2|PTGES3|RCOR1|SH3KBP1|GATAD2A|GATAD2B|TUBB	-3.1
Reactome Gene Sets	6	R-HSA-9679191	GC-NL	Potential therapeutics for SARS	-3.7	3.4	4.6	30286	99	1076	12	1.1	0.32	1173|1312|3326|3614|3615|3716|5336|5931|9219|30011|54815|203068	AP2M1|COMT|HSP90AB1|IMPDH1|IMPDH2|JAK1|PLCG2|RBBP7|MTA2|SH3KBP1|GATAD2A|TUBB	-2.6
Reactome Gene Sets	6	R-HSA-9679191	GASTRITIS	Potential therapeutics for SARS	-3.9	4.2	5	30286	99	724	10	1.4	0.43	1312|3320|3326|3615|5336|9219|10728|30011|54815|203068	COMT|HSP90AA1|HSP90AB1|IMPDH2|PLCG2|MTA2|PTGES3|SH3KBP1|GATAD2A|TUBB	-3.2
Reactome Gene Sets	6	R-HSA-9679191	IM-LGD-NL	Potential therapeutics for SARS	-2.3	4.6	3.8	30286	99	333	5	1.5	0.67	3326|3615|5336|10728|23186	HSP90AB1|IMPDH2|PLCG2|PTGES3|RCOR1	-1.5
Reactome Gene Sets	6	R-HSA-1989781	IM-LGD-L	PPARA activates gene expression	-2.7	2.8	3.7	30286	117	1012	11	1.1	0.33	34|183|335|336|1376|2168|2274|6822|9967|10498|376497	ACADM|AGT|APOA1|APOA2|CPT2|FABP1|FHL2|SULT2A1|THRAP3|CARM1|SLC27A1	-2.2
Reactome Gene Sets	6	R-HSA-389957	EGC-L	Prefoldin mediated transfer of substrate to CCT/TriC	-6	8	7.6	30286	28	1217	9	0.74	0.25	5201|5202|10382|10471|10575|10694|22948|81027|84617	PFDN1|PFDN2|TUBB4A|PFDN6|CCT4|CCT8|CCT5|TUBB1|TUBB6	-5
Reactome Gene Sets	6	R-HSA-500657	EGC-L	Presynaptic function of Kainate receptors	-2	4.7	3.5	30286	21	1217	4	0.33	0.16	2788|5331|54331|55970	GNG7|PLCB3|GNG2|GNG12	-1.7
Reactome Gene Sets	6	R-HSA-5693616	GASTRITIS	Presynaptic phase of homologous DNA pairing and strand exchange	-2.6	5.2	4.2	30286	40	724	5	0.69	0.31	472|4683|5982|6117|10111	ATM|NBN|RFC2|RPA1|RAD50	-2.1
Reactome Gene Sets	6	R-HSA-5693616	EGC-L	Presynaptic phase of homologous DNA pairing and strand exchange	-2.3	3.7	3.5	30286	40	1217	6	0.49	0.2	4683|5982|5984|6117|6119|10111	NBN|RFC2|RFC4|RPA1|RPA3|RAD50	-1.9
Reactome Gene Sets	6	R-HSA-72203	GASTRITIS	Processing of Capped Intron-Containing Pre-mRNA	-9.5	4.1	8.3	30286	285	724	28	3.9	0.72	1477|1478|2963|3181|3191|4236|4670|4809|5356|6428|6429|6431|6634|6636|7175|8106|8480|9877|9879|10250|10946|23398|23517|23524|51690|83443|84324|220988	CSTF1|CSTF2|GTF2F2|HNRNPA2B1|HNRNPL|MFAP1|HNRNPM|SNU13|PLRG1|SRSF3|SRSF4|SRSF6|SNRPD3|SNRPF|TPR|PABPN1|RAE1|ZC3H11A|DDX46|SRRM1|SF3A3|PPWD1|MTREX|SRRM2|LSM7|SF3B5|SARNP|HNRNPA3	-8.1
Reactome Gene Sets	6	R-HSA-72203	GC-L	Processing of Capped Intron-Containing Pre-mRNA	-2.9	3.2	3.9	30286	285	336	10	3	0.93	2962|2963|3184|3191|5511|6431|9589|9877|22826|220988	GTF2F1|GTF2F2|HNRNPD|HNRNPL|PPP1R8|SRSF6|WTAP|ZC3H11A|DNAJC8|HNRNPA3	-2.3
Reactome Gene Sets	6	R-HSA-72203	EGC-L	Processing of Capped Intron-Containing Pre-mRNA	-55	7.9	24	30286	285	1217	91	7.5	0.75	988|1477|1478|1655|1660|1665|2962|2963|3185|3187|3191|3312|3550|4236|4670|4809|4927|5356|5411|5434|5511|5725|5903|6428|6429|6431|6627|6628|6633|6634|6636|6637|7175|7307|8086|8106|8480|8683|8896|9128|9130|9295|9416|9589|9775|9879|10179|10189|10250|10286|10523|10594|10762|10914|10915|10946|10992|11051|11157|11338|22826|22938|23283|23350|23398|23450|23517|23524|24148|25804|27238|27258|27336|27339|51…	CDC5L|CSTF1|CSTF2|DDX5|DHX9|DHX15|GTF2F1|GTF2F2|HNRNPF|HNRNPH1|HNRNPL|HSPA8|IK|MFAP1|HNRNPM|SNU13|NUP88|PLRG1|PNN|POLR2E|PPP1R8|PTBP1|RANBP2|SRSF3|SRSF4|SRSF6|SNRPA1|SNRPB|SNRPD2|SNRPD3|SNRPF|SNRPG|TPR|U2AF1|AAAS|PABPN1|RAE1|SRSF9|BUD31|PRPF4|FAM50A|SRSF11|DDX23|WTAP|EIF4A3|DDX46|RBM7|ALYREF|SRRM1|BCAS2|CHERP|PRPF8|NUP50|PAPOLA|TCERG1|SF3A3|SF3B2|NUDT21|LSM6|U2AF2|DNAJC8|SNW1|CSTF2T|U2SURP|PPWD1|…	-53
Reactome Gene Sets	6	R-HSA-72203	IM-LGD-L	Processing of Capped Intron-Containing Pre-mRNA	-23	5.5	14	30286	285	1012	52	5.1	0.69	1665|2962|2963|3184|3185|3187|3188|3312|4236|4809|4927|5356|5411|5434|5725|6431|6432|6628|6636|7919|8480|8683|9128|9295|9775|9785|9877|9939|10250|10286|10523|10762|10915|10946|10992|11051|11157|11338|22826|23398|23450|23524|27339|51691|51692|51747|57819|58517|79869|80145|84321|84844	DHX15|GTF2F1|GTF2F2|HNRNPD|HNRNPF|HNRNPH1|HNRNPH2|HSPA8|MFAP1|SNU13|NUP88|PLRG1|PNN|POLR2E|PTBP1|SRSF6|SRSF7|SNRPB|SNRPF|DDX39B|RAE1|SRSF9|PRPF4|SRSF11|EIF4A3|DHX38|ZC3H11A|RBM8A|SRRM1|BCAS2|CHERP|NUP50|TCERG1|SF3A3|SF3B2|NUDT21|LSM6|U2AF2|DNAJC8|PPWD1|SF3B3|SRRM2|PRPF19|LSM8|CPSF3|LUC7L3|LSM2|RBM25|CPSF7|THOC7|THOC3|PHF5A	-21
Reactome Gene Sets	6	R-HSA-72203	GC-NL	Processing of Capped Intron-Containing Pre-mRNA	-16	4.3	11	30286	285	1076	44	4.1	0.6	988|1478|1660|1665|2962|2963|3181|3184|3191|4236|4670|4809|4904|5411|5434|5725|6431|6627|6632|6634|7175|8086|8106|8480|9129|9130|9416|9877|10189|10250|10286|10594|10915|10946|11051|22826|23450|24148|27336|51690|51692|53371|83443|220988	CDC5L|CSTF2|DHX9|DHX15|GTF2F1|GTF2F2|HNRNPA2B1|HNRNPD|HNRNPL|MFAP1|HNRNPM|SNU13|YBX1|PNN|POLR2E|PTBP1|SRSF6|SNRPA1|SNRPD1|SNRPD3|TPR|AAAS|PABPN1|RAE1|PRPF3|FAM50A|DDX23|ZC3H11A|ALYREF|SRRM1|BCAS2|PRPF8|TCERG1|SF3A3|NUDT21|DNAJC8|SF3B3|PRPF6|HTATSF1|LSM7|CPSF3|NUP54|SF3B5|HNRNPA3	-14
Reactome Gene Sets	6	R-HSA-75067	GASTRITIS	Processing of Capped Intronless Pre-mRNA	-3.2	7.2	5.2	30286	29	724	5	0.69	0.31	1477|1478|6634|6636|8106	CSTF1|CSTF2|SNRPD3|SNRPF|PABPN1	-2.7
Reactome Gene Sets	6	R-HSA-75067	IM-LGD-L	Processing of Capped Intronless Pre-mRNA	-2.6	5.2	4.2	30286	29	1012	5	0.49	0.22	6628|6636|11051|51692|79869	SNRPB|SNRPF|NUDT21|CPSF3|CPSF7	-2.1
Reactome Gene Sets	6	R-HSA-75067	EGC-L	Processing of Capped Intronless Pre-mRNA	-9.3	10	10	30286	29	1217	12	0.99	0.28	1477|1478|6628|6634|6636|6637|8106|10914|11051|23283|51692|79869	CSTF1|CSTF2|SNRPB|SNRPD3|SNRPF|SNRPG|PABPN1|PAPOLA|NUDT21|CSTF2T|CPSF3|CPSF7	-8
Reactome Gene Sets	6	R-HSA-75067	GC-NL	Processing of Capped Intronless Pre-mRNA	-2.5	4.9	4	30286	29	1076	5	0.46	0.21	1478|6634|8106|11051|51692	CSTF2|SNRPD3|PABPN1|NUDT21|CPSF3	-1.7
Reactome Gene Sets	6	R-HSA-77595	EGC-L	Processing of Intronless Pre-mRNAs	-6.3	10	8.2	30286	20	1217	8	0.66	0.23	1477|1478|8106|10914|11051|23283|51692|79869	CSTF1|CSTF2|PABPN1|PAPOLA|NUDT21|CSTF2T|CPSF3|CPSF7	-5.2
Reactome Gene Sets	6	R-HSA-77595	GC-NL	Processing of Intronless Pre-mRNAs	-2.3	5.6	4	30286	20	1076	4	0.37	0.19	1478|8106|11051|51692	CSTF2|PABPN1|NUDT21|CPSF3	-1.5
Reactome Gene Sets	6	R-HSA-8949664	GC-L	Processing of SMDT1	-3.2	17	6.7	30286	16	336	3	0.89	0.51	6687|10939|79568	SPG7|AFG3L2|MAIP1	-2.6
Reactome Gene Sets	6	R-HSA-8949664	GASTRITIS	Processing of SMDT1	-2.2	7.8	4.3	30286	16	724	3	0.41	0.24	10939|30968|79568	AFG3L2|STOML2|MAIP1	-1.8
Reactome Gene Sets	6	R-HSA-8949664	GC-NL	Processing of SMDT1	-2.7	7	4.6	30286	16	1076	4	0.37	0.19	6687|10939|30968|79568	SPG7|AFG3L2|STOML2|MAIP1	-1.8
Reactome Gene Sets	6	R-HSA-174414	GASTRITIS	Processive synthesis on the C-strand of the telomere	-4.2	11	6.8	30286	19	724	5	0.69	0.31	2237|5111|5424|6117|54386	FEN1|PCNA|POLD1|RPA1|TERF2IP	-3.4
Reactome Gene Sets	6	R-HSA-174414	EGC-L	Processive synthesis on the C-strand of the telomere	-5.3	9.2	7.3	30286	19	1217	7	0.58	0.22	2237|5111|5424|5425|6117|6119|54386	FEN1|PCNA|POLD1|POLD2|RPA1|RPA3|TERF2IP	-4.3
Reactome Gene Sets	6	R-HSA-174414	IM-LGD-L	Processive synthesis on the C-strand of the telomere	-3.5	7.9	5.6	30286	19	1012	5	0.49	0.22	5111|5424|5425|6118|54386	PCNA|POLD1|POLD2|RPA2|TERF2IP	-2.9
Reactome Gene Sets	6	R-HSA-174414	GC-NL	Processive synthesis on the C-strand of the telomere	-2.4	5.9	4.1	30286	19	1076	4	0.37	0.19	2237|5111|5424|54386	FEN1|PCNA|POLD1|TERF2IP	-1.6
Reactome Gene Sets	6	R-HSA-69183	EGC-L	Processive synthesis on the lagging strand	-4.8	10	7.1	30286	15	1217	6	0.49	0.2	2237|5111|5424|5425|6117|6119	FEN1|PCNA|POLD1|POLD2|RPA1|RPA3	-3.9
Reactome Gene Sets	6	R-HSA-69183	GASTRITIS	Processive synthesis on the lagging strand	-3.4	11	6.2	30286	15	724	4	0.55	0.28	2237|5111|5424|6117	FEN1|PCNA|POLD1|RPA1	-2.8
Reactome Gene Sets	6	R-HSA-69183	IM-LGD-L	Processive synthesis on the lagging strand	-2.9	8	5	30286	15	1012	4	0.4	0.2	5111|5424|5425|6118	PCNA|POLD1|POLD2|RPA2	-2.4
Reactome Gene Sets	6	R-HSA-5357801	GASTRITIS	Programmed Cell Death	-6.6	3.9	6.7	30286	213	724	20	2.8	0.61	929|1991|3007|3009|3146|3148|3320|3837|4001|4976|5694|5695|5696|5699|5721|7431|7529|10211|25978|79792	CD14|ELANE|H1-3|H1-5|HMGB1|HMGB2|HSP90AA1|KPNB1|LMNB1|OPA1|PSMB6|PSMB7|PSMB8|PSMB10|PSME2|VIM|YWHAB|FLOT1|CHMP2B|GSDMD	-5.5
Reactome Gene Sets	6	R-HSA-5357801	EGC-L	Programmed Cell Death	-5.8	2.9	5.8	30286	213	1217	25	2.1	0.41	929|1991|3007|3009|3146|3148|3320|3606|3837|4001|4976|5062|5339|5580|5696|5699|5704|5710|5721|7431|7534|10134|11140|128866|353376	CD14|ELANE|H1-3|H1-5|HMGB1|HMGB2|HSP90AA1|IL18|KPNB1|LMNB1|OPA1|PAK2|PLEC|PRKCD|PSMB8|PSMB10|PSMC4|PSMD4|PSME2|VIM|YWHAZ|BCAP31|CDC37|CHMP4B|TICAM2	-4.8
Reactome Gene Sets	6	R-HSA-5357801	IM-LGD-L	Programmed Cell Death	-3.5	2.5	4.2	30286	213	1012	18	1.8	0.42	331|834|1991|3007|3148|3320|3606|4001|5339|5687|5692|5696|5699|5710|5721|11140|29082|128866	XIAP|CASP1|ELANE|H1-3|HMGB2|HSP90AA1|IL18|LMNB1|PLEC|PSMA6|PSMB4|PSMB8|PSMB10|PSMD4|PSME2|CDC37|CHMP4A|CHMP4B	-2.9
Reactome Gene Sets	6	R-HSA-5357801	GC-NL	Programmed Cell Death	-3.6	2.5	4.2	30286	213	1076	19	1.8	0.4	929|1991|3007|3009|3148|3606|4001|4976|5062|5339|5580|5695|5704|6233|7431|11140|51074|56616|353376	CD14|ELANE|H1-3|H1-5|HMGB2|IL18|LMNB1|OPA1|PAK2|PLEC|PRKCD|PSMB7|PSMC4|RPS27A|VIM|CDC37|APIP|DIABLO|TICAM2	-2.5
Reactome Gene Sets	6	R-HSA-71032	IM-LGD-L	Propionyl-CoA catabolism	-3.5	18	7.1	30286	5	1012	3	0.3	0.17	4594|5095|84693	MMUT|PCCA|MCEE	-2.8
Reactome Gene Sets	6	R-HSA-71032	GC-NL	Propionyl-CoA catabolism	-3.4	17	6.8	30286	5	1076	3	0.28	0.16	4594|5095|84693	MMUT|PCCA|MCEE	-2.3
Reactome Gene Sets	6	R-HSA-71032	EGC-L	Propionyl-CoA catabolism	-3.2	15	6.4	30286	5	1217	3	0.25	0.14	4594|5095|84693	MMUT|PCCA|MCEE	-2.6
Reactome Gene Sets	6	R-HSA-392851	EGC-L	Prostacyclin signalling through prostacyclin receptor	-2.2	5.2	3.8	30286	19	1217	4	0.33	0.16	2778|2788|54331|55970	GNAS|GNG7|GNG2|GNG12	-1.8
Reactome Gene Sets	6	R-HSA-391251	EGC-L	Protein folding	-8.1	4.9	7.9	30286	96	1217	19	1.6	0.36	2767|2776|2788|5201|5202|6499|10382|10471|10528|10564|10575|10694|22803|22948|26985|54331|55970|81027|84617	GNA11|GNAQ|GNG7|PFDN1|PFDN2|SKIC2|TUBB4A|PFDN6|NOP56|ARFGEF2|CCT4|CCT8|XRN2|CCT5|AP3M1|GNG2|GNG12|TUBB1|TUBB6	-6.9
Reactome Gene Sets	6	R-HSA-391251	IM-LGD-NL	Protein folding	-2.4	4.7	3.9	30286	96	333	5	1.5	0.67	2767|2776|6904|55970|81027	GNA11|GNAQ|TBCD|GNG12|TUBB1	-1.6
Reactome Gene Sets	6	R-HSA-9857492	GASTRITIS	Protein lipoylation	-5.8	21	9.9	30286	10	724	5	0.69	0.31	1629|1737|1743|2653|27247	DBT|DLAT|DLST|GCSH|NFU1	-4.8
Reactome Gene Sets	6	R-HSA-9857492	GC-NL	Protein lipoylation	-6.4	17	9.6	30286	10	1076	6	0.56	0.23	1629|1737|1743|2230|2653|27247	DBT|DLAT|DLST|FDX1|GCSH|NFU1	-4.9
Reactome Gene Sets	6	R-HSA-9857492	EGC-L	Protein lipoylation	-4.7	12	7.4	30286	10	1217	5	0.41	0.18	1629|1737|1743|2653|27247	DBT|DLAT|DLST|GCSH|NFU1	-3.8
Reactome Gene Sets	6	R-HSA-9857492	IM-LGD-L	Protein lipoylation	-6.6	18	10	30286	10	1012	6	0.59	0.24	1629|1737|1743|2230|2653|27247	DBT|DLAT|DLST|FDX1|GCSH|NFU1	-5.5
Reactome Gene Sets	6	R-HSA-9609507	GASTRITIS	Protein localization	-11	5.9	9.8	30286	164	724	23	3.2	0.65	50|506|1384|1431|1537|1678|3155|3162|4714|7416|10063|10455|10651|25813|26517|26521|51024|56942|79145|92609|197257|390916|100272147	ACO2|ATP5F1B|CRAT|CS|CYC1|TIMM8A|HMGCL|HMOX1|NDUFB8|VDAC1|COX17|ECI2|MTX2|SAMM50|TIMM13|TIMM8B|FIS1|CMC2|CHCHD7|TIMM50|LDHD|NUDT19|CMC4	-9.5
Reactome Gene Sets	6	R-HSA-9609507	EGC-L	Protein localization	-11	4.4	8.9	30286	164	1217	29	2.4	0.44	50|224|291|293|506|1384|1431|1537|2671|3155|4714|6449|6844|7323|7416|8540|10063|10455|10651|10952|23480|25813|51024|54927|56942|79145|197257|390916|100272147	ACO2|ALDH3A2|SLC25A4|SLC25A6|ATP5F1B|CRAT|CS|CYC1|GFER|HMGCL|NDUFB8|SGTA|VAMP2|UBE2D3|VDAC1|AGPS|COX17|ECI2|MTX2|SEC61B|SEC61G|SAMM50|FIS1|CHCHD3|CMC2|CHCHD7|LDHD|NUDT19|CMC4	-9.3
Reactome Gene Sets	6	R-HSA-9609507	GC-L	Protein localization	-4	4.9	5.4	30286	164	336	9	2.7	0.88	293|1537|3416|4714|7323|7416|25813|51024|390916	SLC25A6|CYC1|IDE|NDUFB8|UBE2D3|VDAC1|SAMM50|FIS1|NUDT19	-3.3
Reactome Gene Sets	6	R-HSA-9609507	IM-LGD-NL	Protein localization	-2	3.3	3.2	30286	164	333	6	1.8	0.73	3155|4714|7416|10063|51024|79145	HMGCL|NDUFB8|VDAC1|COX17|FIS1|CHCHD7	-1.3
Reactome Gene Sets	6	R-HSA-9609507	IM-LGD-L	Protein localization	-25	7.7	16	30286	164	1012	42	4.2	0.63	50|291|293|506|617|1384|1431|1537|1678|1891|2010|2671|3155|3162|3313|3329|4580|4714|5009|6844|7416|8540|9868|10063|10455|10469|10651|10952|23480|25813|26515|26519|54927|56942|56993|79145|84269|84896|150274|197257|390916|100272147	ACO2|SLC25A4|SLC25A6|ATP5F1B|BCS1L|CRAT|CS|CYC1|TIMM8A|ECH1|EMD|GFER|HMGCL|HMOX1|HSPA9|HSPD1|MTX1|NDUFB8|OTC|VAMP2|VDAC1|AGPS|TOMM70|COX17|ECI2|TIMM44|MTX2|SEC61B|SEC61G|SAMM50|TIMM10B|TIMM10|CHCHD3|CMC2|TOMM22|CHCHD7|CHCHD5|ATAD1|HSCB|LDHD|NUDT19|CMC4	-23
Reactome Gene Sets	6	R-HSA-9609507	GC-NL	Protein localization	-19	6.4	13	30286	164	1076	37	3.4	0.56	50|291|293|506|1384|1431|1537|1678|1891|2671|3155|3162|3416|4714|6233|6844|7416|8540|10063|10455|10651|25813|26515|26517|26519|26521|51024|54927|56942|56993|79145|84269|84896|150274|197257|390916|100272147	ACO2|SLC25A4|SLC25A6|ATP5F1B|CRAT|CS|CYC1|TIMM8A|ECH1|GFER|HMGCL|HMOX1|IDE|NDUFB8|RPS27A|VAMP2|VDAC1|AGPS|COX17|ECI2|MTX2|SAMM50|TIMM10B|TIMM13|TIMM10|TIMM8B|FIS1|CHCHD3|CMC2|TOMM22|CHCHD7|CHCHD5|ATAD1|HSCB|LDHD|NUDT19|CMC4	-17
Reactome Gene Sets	6	R-HSA-8876725	GASTRITIS	Protein methylation	-2	6.6	3.8	30286	19	724	3	0.41	0.24	1938|2109|7415	EEF2|ETFB|VCP	-1.7
Reactome Gene Sets	6	R-HSA-8852135	EGC-L	Protein ubiquitination	-2.4	2.8	3.3	30286	79	1217	9	0.74	0.25	3093|5111|7323|7874|23168|51255|54623|56254|79577	UBE2K|PCNA|UBE2D3|USP7|RTF1|RNF181|PAF1|RNF20|CDC73	-2
Reactome Gene Sets	6	R-HSA-74217	IM-LGD-L	Purine salvage	-2.1	6.9	4	30286	13	1012	3	0.3	0.17	100|271|1633	ADA|AMPD2|DCK	-1.8
Reactome Gene Sets	6	R-HSA-9660826	IM-LGD-L	Purinergic signaling in leishmaniasis infection	-4.8	8.1	6.7	30286	26	1012	7	0.69	0.26	718|834|3162|3606|4790|10910|29108	C3|CASP1|HMOX1|IL18|NFKB1|SUGT1|PYCARD	-3.9
Reactome Gene Sets	6	R-HSA-9660826	GASTRITIS	Purinergic signaling in leishmaniasis infection	-3.5	8	5.6	30286	26	724	5	0.69	0.31	3162|3326|4907|29108|79792	HMOX1|HSP90AB1|NT5E|PYCARD|GSDMD	-2.8
Reactome Gene Sets	6	R-HSA-9660826	GC-NL	Purinergic signaling in leishmaniasis infection	-3.6	6.5	5.4	30286	26	1076	6	0.56	0.23	718|3162|3326|3606|10910|29108	C3|HMOX1|HSP90AB1|IL18|SUGT1|PYCARD	-2.5
Reactome Gene Sets	6	R-HSA-9660826	EGC-L	Purinergic signaling in leishmaniasis infection	-3.3	5.7	5	30286	26	1217	6	0.49	0.2	718|3326|3606|4907|10910|29108	C3|HSP90AB1|IL18|NT5E|SUGT1|PYCARD	-2.7
Reactome Gene Sets	6	R-HSA-73614	GC-NL	Pyrimidine salvage	-2.2	7.7	4.3	30286	11	1076	3	0.28	0.16	978|1633|7378	CDA|DCK|UPP1	-1.5
Reactome Gene Sets	6	R-HSA-73614	EGC-L	Pyrimidine salvage	-2.1	6.8	3.9	30286	11	1217	3	0.25	0.14	978|1633|7378	CDA|DCK|UPP1	-1.7
Reactome Gene Sets	6	R-HSA-5620971	GASTRITIS	Pyroptosis	-2.4	6	4.1	30286	28	724	4	0.55	0.28	1991|3146|25978|79792	ELANE|HMGB1|CHMP2B|GSDMD	-2
Reactome Gene Sets	6	R-HSA-5620971	IM-LGD-L	Pyroptosis	-2.7	5.3	4.3	30286	28	1012	5	0.49	0.22	834|1991|3606|29082|128866	CASP1|ELANE|IL18|CHMP4A|CHMP4B	-2.2
Reactome Gene Sets	6	R-HSA-70268	GC-NL	Pyruvate metabolism	-7	6.9	7.9	30286	49	1076	12	1.1	0.32	1737|3029|3945|4200|5091|5162|6233|7416|10873|25874|55066|81889	DLAT|HAGH|LDHB|ME2|PC|PDHB|RPS27A|VDAC1|ME3|MPC2|PDPR|FAHD1	-5.3
Reactome Gene Sets	6	R-HSA-70268	GASTRITIS	Pyruvate metabolism	-3.8	6	5.5	30286	49	724	7	0.97	0.36	1737|3029|3945|5162|7416|25874|81889	DLAT|HAGH|LDHB|PDHB|VDAC1|MPC2|FAHD1	-3.1
Reactome Gene Sets	6	R-HSA-70268	IM-LGD-L	Pyruvate metabolism	-3.7	4.9	5.1	30286	49	1012	8	0.79	0.28	1737|3945|5091|7416|25874|54704|55066|81889	DLAT|LDHB|PC|VDAC1|MPC2|PDP1|PDPR|FAHD1	-3
Reactome Gene Sets	6	R-HSA-70268	EGC-L	Pyruvate metabolism	-7.3	6.6	8	30286	49	1217	13	1.1	0.29	1737|2875|3029|3945|4200|5091|5162|5165|7416|10873|25874|54704|55066	DLAT|GPT|HAGH|LDHB|ME2|PC|PDHB|PDK3|VDAC1|ME3|MPC2|PDP1|PDPR	-6.2
Reactome Gene Sets	6	R-HSA-5365859	EGC-L	RA biosynthesis pathway	-3.7	6.8	5.6	30286	22	1217	6	0.49	0.2	126|216|220|51109|57665|112724	ADH1C|ALDH1A1|ALDH1A3|RDH11|RDH14|RDH13	-3.1
Reactome Gene Sets	6	R-HSA-5365859	IM-LGD-L	RA biosynthesis pathway	-2.3	5.4	3.9	30286	22	1012	4	0.4	0.2	216|51109|57665|112724	ALDH1A1|RDH11|RDH14|RDH13	-1.9
Reactome Gene Sets	6	R-HSA-5365859	GC-NL	RA biosynthesis pathway	-4	7.7	6	30286	22	1076	6	0.56	0.23	126|216|220|8644|57665|112724	ADH1C|ALDH1A1|ALDH1A3|AKR1C3|RDH14|RDH13	-2.9
Reactome Gene Sets	6	R-HSA-9013149	GASTRITIS	RAC1 GTPase cycle	-2.3	2.5	3.2	30286	185	724	11	1.5	0.45	397|1536|1794|4162|7037|7456|8976|23075|23526|23592|50619	ARHGDIB|CYBB|DOCK2|MCAM|TFRC|WIPF1|WASL|SWAP70|ARHGAP45|LEMD3|DEF6	-1.9
Reactome Gene Sets	6	R-HSA-9013149	GC-NL	RAC1 GTPase cycle	-3	2.4	3.8	30286	185	1076	16	1.5	0.37	397|1536|4162|5062|7037|7454|7456|8826|10787|10788|11135|23075|23344|23526|23592|50619	ARHGDIB|CYBB|MCAM|PAK2|TFRC|WAS|WIPF1|IQGAP1|NCKAP1|IQGAP2|CDC42EP1|SWAP70|ESYT1|ARHGAP45|LEMD3|DEF6	-2.1
Reactome Gene Sets	6	R-HSA-9013149	IM-LGD-NL	RAC1 GTPase cycle	-3	3.9	4.2	30286	185	333	8	2.4	0.84	397|1536|4162|7037|7454|7456|10788|50619	ARHGDIB|CYBB|MCAM|TFRC|WAS|WIPF1|IQGAP2|DEF6	-2
Reactome Gene Sets	6	R-HSA-9013404	GC-NL	RAC2 GTPase cycle	-5.6	4.5	6.3	30286	88	1076	14	1.3	0.35	1536|3998|4162|5062|5880|7037|8826|10787|11135|23075|23344|23592|25813|50619	CYBB|LMAN1|MCAM|PAK2|RAC2|TFRC|IQGAP1|NCKAP1|CDC42EP1|SWAP70|ESYT1|LEMD3|SAMM50|DEF6	-4.1
Reactome Gene Sets	6	R-HSA-9013404	EGC-L	RAC2 GTPase cycle	-5.7	4.2	6.2	30286	88	1217	15	1.2	0.32	1536|3998|4162|5062|5880|7037|7112|8826|9217|10424|10787|23075|23191|23592|25813	CYBB|LMAN1|MCAM|PAK2|RAC2|TFRC|TMPO|IQGAP1|VAPB|PGRMC2|NCKAP1|SWAP70|CYFIP1|LEMD3|SAMM50	-4.7
Reactome Gene Sets	6	R-HSA-9013404	GC-L	RAC2 GTPase cycle	-3.3	6.1	5.1	30286	88	336	6	1.8	0.72	4162|11135|23075|23592|25813|50619	MCAM|CDC42EP1|SWAP70|LEMD3|SAMM50|DEF6	-2.7
Reactome Gene Sets	6	R-HSA-9013404	GASTRITIS	RAC2 GTPase cycle	-3.6	4.3	4.8	30286	88	724	9	1.2	0.41	1536|1794|4162|5880|7037|23075|23592|25813|50619	CYBB|DOCK2|MCAM|RAC2|TFRC|SWAP70|LEMD3|SAMM50|DEF6	-2.9
Reactome Gene Sets	6	R-HSA-9013404	IM-LGD-L	RAC2 GTPase cycle	-3.8	3.7	4.8	30286	88	1012	11	1.1	0.33	2010|3998|4580|5880|7037|10424|11135|23075|23092|23592|25813	EMD|LMAN1|MTX1|RAC2|TFRC|PGRMC2|CDC42EP1|SWAP70|ARHGAP26|LEMD3|SAMM50	-3.1
Reactome Gene Sets	6	R-HSA-9013404	IM-LGD-NL	RAC2 GTPase cycle	-2.5	5.2	4.1	30286	88	333	5	1.5	0.67	1536|4162|5880|7037|50619	CYBB|MCAM|RAC2|TFRC|DEF6	-1.7
Reactome Gene Sets	6	R-HSA-9013423	EGC-L	RAC3 GTPase cycle	-3.4	3.2	4.3	30286	94	1217	12	0.99	0.28	397|1536|3998|4162|5062|7037|7112|10424|10787|23075|23191|23592	ARHGDIB|CYBB|LMAN1|MCAM|PAK2|TFRC|TMPO|PGRMC2|NCKAP1|SWAP70|CYFIP1|LEMD3	-2.8
Reactome Gene Sets	6	R-HSA-9013423	GC-NL	RAC3 GTPase cycle	-3.3	3.3	4.3	30286	94	1076	11	1	0.31	397|1536|3998|4162|5062|7037|10787|11135|23075|23344|23592	ARHGDIB|CYBB|LMAN1|MCAM|PAK2|TFRC|NCKAP1|CDC42EP1|SWAP70|ESYT1|LEMD3	-2.3
Reactome Gene Sets	6	R-HSA-9013423	IM-LGD-L	RAC3 GTPase cycle	-2.4	2.9	3.4	30286	94	1012	9	0.89	0.3	397|2010|3998|7037|10424|11135|23075|23092|23592	ARHGDIB|EMD|LMAN1|TFRC|PGRMC2|CDC42EP1|SWAP70|ARHGAP26|LEMD3	-2
Reactome Gene Sets	6	R-HSA-110314	EGC-L	Recognition of DNA damage by PCNA-containing replication complex	-4.8	6.6	6.3	30286	30	1217	8	0.66	0.23	5111|5424|5425|5982|5984|6117|6119|54107	PCNA|POLD1|POLD2|RFC2|RFC4|RPA1|RPA3|POLE3	-3.9
Reactome Gene Sets	6	R-HSA-110314	GC-NL	Recognition of DNA damage by PCNA-containing replication complex	-4.2	6.6	5.9	30286	30	1076	7	0.65	0.25	5111|5424|5981|5982|5984|6233|54107	PCNA|POLD1|RFC1|RFC2|RFC4|RPS27A|POLE3	-2.9
Reactome Gene Sets	6	R-HSA-110314	GASTRITIS	Recognition of DNA damage by PCNA-containing replication complex	-2.3	5.6	3.9	30286	30	724	4	0.55	0.28	5111|5424|5982|6117	PCNA|POLD1|RFC2|RPA1	-1.9
Reactome Gene Sets	6	R-HSA-110314	IM-LGD-L	Recognition of DNA damage by PCNA-containing replication complex	-2.5	5	4.1	30286	30	1012	5	0.49	0.22	5111|5424|5425|5982|6118	PCNA|POLD1|POLD2|RFC2|RPA2	-2.1
Reactome Gene Sets	6	R-HSA-380270	EGC-L	Recruitment of mitotic centrosome proteins and complexes	-2.3	2.7	3.2	30286	82	1217	9	0.74	0.25	983|3320|5048|5108|5577|10121|10382|22919|203068	CDK1|HSP90AA1|PAFAH1B1|PCM1|PRKAR2B|ACTR1A|TUBB4A|MAPRE1|TUBB	-1.9
Reactome Gene Sets	6	R-HSA-380320	EGC-L	Recruitment of NuMA to mitotic centrosomes	-2.9	2.9	3.8	30286	94	1217	11	0.9	0.27	983|3320|5048|5108|5577|10121|10382|22919|81027|84617|203068	CDK1|HSP90AA1|PAFAH1B1|PCM1|PRKAR2B|ACTR1A|TUBB4A|MAPRE1|TUBB1|TUBB6|TUBB	-2.3
Reactome Gene Sets	6	R-HSA-5218859	GASTRITIS	Regulated Necrosis	-2.5	4.2	3.9	30286	60	724	6	0.83	0.34	1991|3146|3320|10211|25978|79792	ELANE|HMGB1|HSP90AA1|FLOT1|CHMP2B|GSDMD	-2.1
Reactome Gene Sets	6	R-HSA-5218859	IM-LGD-L	Regulated Necrosis	-3.1	4	4.3	30286	60	1012	8	0.79	0.28	331|834|1991|3320|3606|11140|29082|128866	XIAP|CASP1|ELANE|HSP90AA1|IL18|CDC37|CHMP4A|CHMP4B	-2.5
Reactome Gene Sets	6	R-HSA-2029482	GASTRITIS	Regulation of actin dynamics for phagocytic cup formation	-2.5	4.1	3.8	30286	61	724	6	0.83	0.34	3320|3326|7456|8976|9844|10095	HSP90AA1|HSP90AB1|WIPF1|WASL|ELMO1|ARPC1B	-2
Reactome Gene Sets	6	R-HSA-2029482	EGC-L	Regulation of actin dynamics for phagocytic cup formation	-2.5	3.3	3.6	30286	61	1217	8	0.66	0.23	3320|3326|4627|7456|10095|10552|10787|23191	HSP90AA1|HSP90AB1|MYH9|WIPF1|ARPC1B|ARPC1A|NCKAP1|CYFIP1	-2.1
Reactome Gene Sets	6	R-HSA-2029482	IM-LGD-L	Regulation of actin dynamics for phagocytic cup formation	-2.4	3.4	3.5	30286	61	1012	7	0.69	0.26	1072|3320|7454|8976|10095|10109|10552	CFL1|HSP90AA1|WAS|WASL|ARPC1B|ARPC2|ARPC1A	-2
Reactome Gene Sets	6	R-HSA-2029482	GC-NL	Regulation of actin dynamics for phagocytic cup formation	-2.9	3.7	4	30286	61	1076	8	0.74	0.26	3326|4627|7454|7456|9844|10095|10552|10787	HSP90AB1|MYH9|WAS|WIPF1|ELMO1|ARPC1B|ARPC1A|NCKAP1	-2
Reactome Gene Sets	6	R-HSA-211733	GASTRITIS	Regulation of activated PAK-2p34 by proteasome mediated degradation	-2.2	4.2	3.5	30286	50	724	5	0.69	0.31	5694|5695|5696|5699|5721	PSMB6|PSMB7|PSMB8|PSMB10|PSME2	-1.8
Reactome Gene Sets	6	R-HSA-211733	IM-LGD-L	Regulation of activated PAK-2p34 by proteasome mediated degradation	-2.2	3.6	3.4	30286	50	1012	6	0.59	0.24	5687|5692|5696|5699|5710|5721	PSMA6|PSMB4|PSMB8|PSMB10|PSMD4|PSME2	-1.8
Reactome Gene Sets	6	R-HSA-169911	GASTRITIS	Regulation of Apoptosis	-2.8	4.7	4.3	30286	53	724	6	0.83	0.34	4976|5694|5695|5696|5699|5721	OPA1|PSMB6|PSMB7|PSMB8|PSMB10|PSME2	-2.3
Reactome Gene Sets	6	R-HSA-169911	EGC-L	Regulation of Apoptosis	-2.3	3.3	3.4	30286	53	1217	7	0.58	0.22	4976|5062|5696|5699|5704|5710|5721	OPA1|PAK2|PSMB8|PSMB10|PSMC4|PSMD4|PSME2	-1.9
Reactome Gene Sets	6	R-HSA-169911	IM-LGD-L	Regulation of Apoptosis	-2.1	3.4	3.2	30286	53	1012	6	0.59	0.24	5687|5692|5696|5699|5710|5721	PSMA6|PSMB4|PSMB8|PSMB10|PSMD4|PSME2	-1.8
Reactome Gene Sets	6	R-HSA-1655829	IM-LGD-L	Regulation of cholesterol biosynthesis by SREBP (SREBF)	-2.6	3.8	3.9	30286	55	1012	7	0.69	0.26	31|4598|5901|9871|10484|10498|10802	ACACA|MVK|RAN|SEC24D|SEC23A|CARM1|SEC24A	-2.2
Reactome Gene Sets	6	R-HSA-977606	GASTRITIS	Regulation of Complement cascade	-3.9	6.2	5.6	30286	47	724	7	0.97	0.36	713|714|721|732|966|1991|3426	C1QB|C1QC|C4B|C8B|CD59|ELANE|CFI	-3.2
Reactome Gene Sets	6	R-HSA-977606	IM-LGD-NL	Regulation of Complement cascade	-6.1	14	9.1	30286	47	333	7	2.1	0.79	713|714|715|716|722|4179|7448	C1QB|C1QC|C1R|C1S|C4BPA|CD46|VTN	-4.6
Reactome Gene Sets	6	R-HSA-977606	IM-LGD-L	Regulation of Complement cascade	-24	16	19	30286	47	1012	25	2.5	0.49	629|710|713|714|715|716|718|721|722|729|730|731|732|733|735|1191|1370|1991|2147|3075|3080|3426|5199|5627|7448	CFB|SERPING1|C1QB|C1QC|C1R|C1S|C3|C4B|C4BPA|C6|C7|C8A|C8B|C8G|C9|CLU|CPN2|ELANE|F2|CFH|CFHR2|CFI|CFP|PROS1|VTN	-22
Reactome Gene Sets	6	R-HSA-977606	GC-NL	Regulation of Complement cascade	-21	14	17	30286	47	1076	23	2.1	0.44	629|710|713|714|715|716|718|722|729|730|731|733|735|966|1370|1991|2147|3075|3078|3426|5199|5627|7448	CFB|SERPING1|C1QB|C1QC|C1R|C1S|C3|C4BPA|C6|C7|C8A|C8G|C9|CD59|CPN2|ELANE|F2|CFH|CFHR1|CFI|CFP|PROS1|VTN	-18
Reactome Gene Sets	6	R-HSA-977606	EGC-L	Regulation of Complement cascade	-15	11	13	30286	47	1217	20	1.6	0.36	629|710|713|714|715|716|718|722|729|730|735|966|1370|1991|3075|3078|3426|5199|5627|7448	CFB|SERPING1|C1QB|C1QC|C1R|C1S|C3|C4BPA|C6|C7|C9|CD59|CPN2|ELANE|CFH|CFHR1|CFI|CFP|PROS1|VTN	-14
Reactome Gene Sets	6	R-HSA-9010553	EGC-L	Regulation of expression of SLITs and ROBOs	-4.7	2.9	5.1	30286	172	1217	20	1.6	0.36	1605|4736|5696|5699|5704|5710|5721|6122|6134|6135|6136|6139|6146|6188|6193|6210|6231|6923|9775|23521	DAG1|RPL10A|PSMB8|PSMB10|PSMC4|PSMD4|PSME2|RPL3|RPL10|RPL11|RPL12|RPL17|RPL22|RPS3|RPS5|RPS15A|RPS26|ELOB|EIF4A3|RPL13A	-3.8
Reactome Gene Sets	6	R-HSA-9010553	GC-NL	Regulation of expression of SLITs and ROBOs	-2.9	2.5	3.7	30286	172	1076	15	1.4	0.36	1605|2197|4736|5695|5704|6146|6169|6170|6193|6209|6210|6233|6235|9349|23521	DAG1|FAU|RPL10A|PSMB7|PSMC4|RPL22|RPL38|RPL39|RPS5|RPS15|RPS15A|RPS27A|RPS29|RPL23|RPL13A	-2
Reactome Gene Sets	6	R-HSA-9010553	IM-LGD-L	Regulation of expression of SLITs and ROBOs	-2.3	2.3	3.1	30286	172	1012	13	1.3	0.35	1605|2197|5687|5692|5696|5699|5710|5721|6146|6231|9775|9939|200916	DAG1|FAU|PSMA6|PSMB4|PSMB8|PSMB10|PSMD4|PSME2|RPL22|RPS26|EIF4A3|RBM8A|RPL22L1	-1.9
Reactome Gene Sets	6	R-HSA-170822	EGC-L	Regulation of Glucokinase by Glucokinase Regulatory Protein	-3.7	5.6	5.3	30286	31	1217	7	0.58	0.22	4927|5903|7175|8086|8480|10762|53371	NUP88|RANBP2|TPR|AAAS|RAE1|NUP50|NUP54	-3
Reactome Gene Sets	6	R-HSA-3371453	EGC-L	Regulation of HSF1-mediated heat shock response	-5.5	4.7	6.3	30286	69	1217	13	1.1	0.29	3312|4927|5903|6117|6119|7175|8086|8480|10762|22824|51182|53371|57805	HSPA8|NUP88|RANBP2|RPA1|RPA3|TPR|AAAS|RAE1|NUP50|HSPA4L|HSPA14|NUP54|CCAR2	-4.5
Reactome Gene Sets	6	R-HSA-3371453	GASTRITIS	Regulation of HSF1-mediated heat shock response	-2.2	3.6	3.4	30286	69	724	6	0.83	0.34	472|3309|6117|7175|8480|9261	ATM|HSPA5|RPA1|TPR|RAE1|MAPKAPK2	-1.8
Reactome Gene Sets	6	R-HSA-3371453	IM-LGD-L	Regulation of HSF1-mediated heat shock response	-3.3	3.9	4.5	30286	69	1012	9	0.89	0.3	472|3312|3313|4927|6118|6782|8480|10762|51182	ATM|HSPA8|HSPA9|NUP88|RPA2|HSPA13|RAE1|NUP50|HSPA14	-2.7
Reactome Gene Sets	6	R-HSA-422356	EGC-L	Regulation of insulin secretion	-4.2	3.8	5.1	30286	78	1217	12	0.99	0.28	2181|2182|2767|2776|2778|2788|5331|5577|6844|8826|54331|55970	ACSL3|ACSL4|GNA11|GNAQ|GNAS|GNG7|PLCB3|PRKAR2B|VAMP2|IQGAP1|GNG2|GNG12	-3.4
Reactome Gene Sets	6	R-HSA-422356	IM-LGD-L	Regulation of insulin secretion	-2.3	3.1	3.4	30286	78	1012	8	0.79	0.28	2181|2641|2776|2778|2783|4082|5331|6844	ACSL3|GCG|GNAQ|GNAS|GNB2|MARCKS|PLCB3|VAMP2	-1.9
Reactome Gene Sets	6	R-HSA-381426	IM-LGD-L	Regulation of Insulin-like Growth Factor (IGF) transport and uptake by Insulin-like Growth Factor Binding Proteins (IGFBPs)	-8.2	4.8	7.9	30286	125	1012	20	2	0.44	197|335|336|338|348|718|721|1356|2147|2243|2519|3053|3698|5265|5340|7018|7076|7184|8542|10970	AHSG|APOA1|APOA2|APOB|APOE|C3|C4B|CP|F2|FGA|FUCA2|SERPIND1|ITIH2|SERPINA1|PLG|TF|TIMP1|HSP90B1|APOL1|CKAP4	-6.9
Reactome Gene Sets	6	R-HSA-381426	GC-NL	Regulation of Insulin-like Growth Factor (IGF) transport and uptake by Insulin-like Growth Factor Binding Proteins (IGFBPs)	-5.7	3.8	6.1	30286	125	1076	17	1.6	0.38	338|348|718|1356|1471|2147|2200|2243|2519|3483|3485|3698|4052|4313|5265|5340|5768	APOB|APOE|C3|CP|CST3|F2|FBN1|FGA|FUCA2|IGFALS|IGFBP2|ITIH2|LTBP1|MMP2|SERPINA1|PLG|QSOX1	-4.2
Reactome Gene Sets	6	R-HSA-381426	EGC-L	Regulation of Insulin-like Growth Factor (IGF) transport and uptake by Insulin-like Growth Factor Binding Proteins (IGFBPs)	-5.6	3.6	5.9	30286	125	1217	18	1.5	0.35	335|338|348|718|1356|1471|2243|2519|3483|3485|3698|4052|5340|5611|5768|7018|10970|375056	APOA1|APOB|APOE|C3|CP|CST3|FGA|FUCA2|IGFALS|IGFBP2|ITIH2|LTBP1|PLG|DNAJC3|QSOX1|TF|CKAP4|MIA3	-4.6
Reactome Gene Sets	6	R-HSA-1433559	GASTRITIS	Regulation of KIT signaling	-2.2	7.8	4.3	30286	16	724	3	0.41	0.24	867|4067|5777	CBL|LYN|PTPN6	-1.8
Reactome Gene Sets	6	R-HSA-1433559	GC-NL	Regulation of KIT signaling	-2.7	7	4.6	30286	16	1076	4	0.37	0.19	867|4067|5777|7525	CBL|LYN|PTPN6|YES1	-1.8
Reactome Gene Sets	6	R-HSA-400206	IM-LGD-L	Regulation of lipid metabolism by PPARalpha	-2.7	2.8	3.6	30286	119	1012	11	1.1	0.33	34|183|335|336|1376|2168|2274|6822|9967|10498|376497	ACADM|AGT|APOA1|APOA2|CPT2|FABP1|FHL2|SULT2A1|THRAP3|CARM1|SLC27A1	-2.2
Reactome Gene Sets	6	R-HSA-450531	EGC-L	Regulation of mRNA stability by proteins that bind AU-rich elements	-7.2	4.8	7.3	30286	88	1217	17	1.4	0.34	3312|3315|5580|5696|5699|5704|5710|5721|7534|8570|11340|51010|51013|54512|55802|56915|118460	HSPA8|HSPB1|PRKCD|PSMB8|PSMB10|PSMC4|PSMD4|PSME2|YWHAZ|KHSRP|EXOSC8|EXOSC3|EXOSC1|EXOSC4|DCP1A|EXOSC5|EXOSC6	-6
Reactome Gene Sets	6	R-HSA-450531	GASTRITIS	Regulation of mRNA stability by proteins that bind AU-rich elements	-3.6	4.3	4.8	30286	88	724	9	1.2	0.41	5694|5695|5696|5699|5721|7529|8570|9261|55802	PSMB6|PSMB7|PSMB8|PSMB10|PSME2|YWHAB|KHSRP|MAPKAPK2|DCP1A	-2.9
Reactome Gene Sets	6	R-HSA-450531	GC-L	Regulation of mRNA stability by proteins that bind AU-rich elements	-2.5	5.1	4.1	30286	88	336	5	1.5	0.66	3184|5696|5699|5721|9261	HNRNPD|PSMB8|PSMB10|PSME2|MAPKAPK2	-2.1
Reactome Gene Sets	6	R-HSA-450531	IM-LGD-L	Regulation of mRNA stability by proteins that bind AU-rich elements	-2.6	3.1	3.6	30286	88	1012	9	0.89	0.3	3184|3312|5687|5692|5696|5699|5710|5721|51013	HNRNPD|HSPA8|PSMA6|PSMB4|PSMB8|PSMB10|PSMD4|PSME2|EXOSC1	-2.1
Reactome Gene Sets	6	R-HSA-9758274	GC-L	Regulation of NF-kappa B signaling	-3	15	6.3	30286	18	336	3	0.89	0.51	8517|79671|121457	IKBKG|NLRX1|IKBIP	-2.5
Reactome Gene Sets	6	R-HSA-9758274	GC-NL	Regulation of NF-kappa B signaling	-2.5	6.3	4.3	30286	18	1076	4	0.37	0.19	6233|8517|79671|121457	RPS27A|IKBKG|NLRX1|IKBIP	-1.7
Reactome Gene Sets	6	R-HSA-350562	GASTRITIS	Regulation of ornithine decarboxylase (ODC)	-2.1	4.1	3.5	30286	51	724	5	0.69	0.31	5694|5695|5696|5699|5721	PSMB6|PSMB7|PSMB8|PSMB10|PSME2	-1.8
Reactome Gene Sets	6	R-HSA-350562	IM-LGD-L	Regulation of ornithine decarboxylase (ODC)	-2.2	3.5	3.3	30286	51	1012	6	0.59	0.24	5687|5692|5696|5699|5710|5721	PSMA6|PSMB4|PSMB8|PSMB10|PSMD4|PSME2	-1.8
Reactome Gene Sets	6	R-HSA-2565942	EGC-L	Regulation of PLK1 Activity at G2/M Transition	-2.1	2.5	3	30286	88	1217	9	0.74	0.25	983|3320|5048|5108|5577|10121|10382|22919|203068	CDK1|HSP90AA1|PAFAH1B1|PCM1|PRKAR2B|ACTR1A|TUBB4A|MAPRE1|TUBB	-1.7
Reactome Gene Sets	6	R-HSA-8948751	IM-LGD-L	Regulation of PTEN stability and activity	-2.1	3	3.1	30286	69	1012	7	0.69	0.26	331|5687|5692|5696|5699|5710|5721	XIAP|PSMA6|PSMB4|PSMB8|PSMB10|PSMD4|PSME2	-1.8
Reactome Gene Sets	6	R-HSA-204174	EGC-L	Regulation of pyruvate dehydrogenase (PDH) complex	-3.7	8.3	5.8	30286	15	1217	5	0.41	0.18	1737|5162|5165|54704|55066	DLAT|PDHB|PDK3|PDP1|PDPR	-3
Reactome Gene Sets	6	R-HSA-9861718	EGC-L	Regulation of pyruvate metabolism	-2	3.8	3.3	30286	33	1217	5	0.41	0.18	1737|5162|5165|54704|55066	DLAT|PDHB|PDK3|PDP1|PDPR	-1.7
Reactome Gene Sets	6	R-HSA-5658442	IM-LGD-L	Regulation of RAS by GAPs	-2.1	3.1	3.2	30286	68	1012	7	0.69	0.26	4893|5687|5692|5696|5699|5710|5721	NRAS|PSMA6|PSMB4|PSMB8|PSMB10|PSMD4|PSME2	-1.8
Reactome Gene Sets	6	R-HSA-8939902	GASTRITIS	Regulation of RUNX2 expression and activity	-2.1	3.5	3.3	30286	72	724	6	0.83	0.34	865|5694|5695|5696|5699|5721	CBFB|PSMB6|PSMB7|PSMB8|PSMB10|PSME2	-1.8
Reactome Gene Sets	6	R-HSA-8941858	GASTRITIS	Regulation of RUNX3 expression and activity	-2.7	4.6	4.1	30286	55	724	6	0.83	0.34	865|5694|5695|5696|5699|5721	CBFB|PSMB6|PSMB7|PSMB8|PSMB10|PSME2	-2.2
Reactome Gene Sets	6	R-HSA-8941858	IM-LGD-L	Regulation of RUNX3 expression and activity	-2.6	3.8	3.9	30286	55	1012	7	0.69	0.26	865|5687|5692|5696|5699|5710|5721	CBFB|PSMA6|PSMB4|PSMB8|PSMB10|PSMD4|PSME2	-2.2
Reactome Gene Sets	6	R-HSA-912631	GC-NL	Regulation of signaling by CBL	-2.2	5.1	3.7	30286	22	1076	4	0.37	0.19	867|4067|6233|7525	CBL|LYN|RPS27A|YES1	-1.4
Reactome Gene Sets	6	R-HSA-5686938	EGC-L	Regulation of TLR by endogenous ligand	-4.8	7.9	6.6	30286	22	1217	7	0.58	0.22	338|929|2243|2244|3146|6279|6280	APOB|CD14|FGA|FGB|HMGB1|S100A8|S100A9	-3.9
Reactome Gene Sets	6	R-HSA-5686938	GASTRITIS	Regulation of TLR by endogenous ligand	-2.8	7.6	4.9	30286	22	724	4	0.55	0.28	929|3146|6279|79792	CD14|HMGB1|S100A8|GSDMD	-2.3
Reactome Gene Sets	6	R-HSA-5686938	IM-LGD-L	Regulation of TLR by endogenous ligand	-2.3	5.4	3.9	30286	22	1012	4	0.4	0.2	338|2243|2244|6279	APOB|FGA|FGB|S100A8	-1.9
Reactome Gene Sets	6	R-HSA-5686938	GC-NL	Regulation of TLR by endogenous ligand	-4	7.7	6	30286	22	1076	6	0.56	0.23	338|929|2243|2244|6279|6280	APOB|CD14|FGA|FGB|S100A8|S100A9	-2.9
Reactome Gene Sets	6	R-HSA-5633007	EGC-L	Regulation of TP53 Activity	-4.1	2.8	4.7	30286	160	1217	18	1.5	0.35	983|2475|4683|5931|5982|5984|6117|6119|6749|7874|8148|9219|10111|10848|11198|26155|54815|57459	CDK1|MTOR|NBN|RBBP7|RFC2|RFC4|RPA1|RPA3|SSRP1|USP7|TAF15|MTA2|RAD50|PPP1R13L|SUPT16H|NOC2L|GATAD2A|GATAD2B	-3.3
Reactome Gene Sets	6	R-HSA-5633007	GASTRITIS	Regulation of TP53 Activity	-2.8	2.9	3.7	30286	160	724	11	1.5	0.45	472|983|4683|5982|6117|6749|9219|10111|11198|26155|54815	ATM|CDK1|NBN|RFC2|RPA1|SSRP1|MTA2|RAD50|SUPT16H|NOC2L|GATAD2A	-2.3
Reactome Gene Sets	6	R-HSA-6804756	GASTRITIS	Regulation of TP53 Activity through Phosphorylation	-2.8	3.6	4	30286	92	724	8	1.1	0.39	472|4683|5982|6117|6749|10111|11198|26155	ATM|NBN|RFC2|RPA1|SSRP1|RAD50|SUPT16H|NOC2L	-2.3
Reactome Gene Sets	6	R-HSA-6804756	EGC-L	Regulation of TP53 Activity through Phosphorylation	-2.4	2.7	3.4	30286	92	1217	10	0.82	0.26	4683|5982|5984|6117|6119|6749|8148|10111|11198|26155	NBN|RFC2|RFC4|RPA1|RPA3|SSRP1|TAF15|RAD50|SUPT16H|NOC2L	-2
Reactome Gene Sets	6	R-HSA-69166	EGC-L	Removal of the Flap Intermediate	-5	11	7.4	30286	14	1217	6	0.49	0.2	2237|5111|5424|5425|6117|6119	FEN1|PCNA|POLD1|POLD2|RPA1|RPA3	-4.1
Reactome Gene Sets	6	R-HSA-69166	GASTRITIS	Removal of the Flap Intermediate	-3.6	12	6.4	30286	14	724	4	0.55	0.28	2237|5111|5424|6117	FEN1|PCNA|POLD1|RPA1	-2.9
Reactome Gene Sets	6	R-HSA-69166	IM-LGD-L	Removal of the Flap Intermediate	-3	8.6	5.3	30286	14	1012	4	0.4	0.2	5111|5424|5425|6118	PCNA|POLD1|POLD2|RPA2	-2.5
Reactome Gene Sets	6	R-HSA-174437	EGC-L	Removal of the Flap Intermediate from the C-strand	-5.6	10	7.8	30286	17	1217	7	0.58	0.22	2237|5111|5424|5425|6117|6119|54386	FEN1|PCNA|POLD1|POLD2|RPA1|RPA3|TERF2IP	-4.7
Reactome Gene Sets	6	R-HSA-174437	GASTRITIS	Removal of the Flap Intermediate from the C-strand	-4.4	12	7.3	30286	17	724	5	0.69	0.31	2237|5111|5424|6117|54386	FEN1|PCNA|POLD1|RPA1|TERF2IP	-3.6
Reactome Gene Sets	6	R-HSA-174437	GC-NL	Removal of the Flap Intermediate from the C-strand	-2.6	6.6	4.5	30286	17	1076	4	0.37	0.19	2237|5111|5424|54386	FEN1|PCNA|POLD1|TERF2IP	-1.7
Reactome Gene Sets	6	R-HSA-174437	IM-LGD-L	Removal of the Flap Intermediate from the C-strand	-3.7	8.8	6	30286	17	1012	5	0.49	0.22	5111|5424|5425|6118|54386	PCNA|POLD1|POLD2|RPA2|TERF2IP	-3.1
Reactome Gene Sets	6	R-HSA-73933	EGC-L	Resolution of Abasic Sites (AP sites)	-7.6	7.7	8.5	30286	39	1217	12	0.99	0.28	142|2237|4350|5111|5424|5425|5982|5984|6117|6119|7515|54107	PARP1|FEN1|MPG|PCNA|POLD1|POLD2|RFC2|RFC4|RPA1|RPA3|XRCC1|POLE3	-6.4
Reactome Gene Sets	6	R-HSA-73933	GASTRITIS	Resolution of Abasic Sites (AP sites)	-4.5	7.5	6.4	30286	39	724	7	0.97	0.36	142|2237|4350|5111|5424|5982|6117	PARP1|FEN1|MPG|PCNA|POLD1|RFC2|RPA1	-3.6
Reactome Gene Sets	6	R-HSA-73933	GC-NL	Resolution of Abasic Sites (AP sites)	-5.2	6.5	6.6	30286	39	1076	9	0.84	0.28	142|2237|4350|5111|5424|5981|5982|5984|54107	PARP1|FEN1|MPG|PCNA|POLD1|RFC1|RFC2|RFC4|POLE3	-3.8
Reactome Gene Sets	6	R-HSA-73933	IM-LGD-L	Resolution of Abasic Sites (AP sites)	-2	3.8	3.3	30286	39	1012	5	0.49	0.22	5111|5424|5425|5982|6118	PCNA|POLD1|POLD2|RFC2|RPA2	-1.7
Reactome Gene Sets	6	R-HSA-110373	EGC-L	Resolution of AP sites via the multiple-nucleotide patch replacement pathway	-7.5	9.6	8.9	30286	26	1217	10	0.82	0.26	142|2237|5111|5424|5425|5982|5984|6117|6119|54107	PARP1|FEN1|PCNA|POLD1|POLD2|RFC2|RFC4|RPA1|RPA3|POLE3	-6.3
Reactome Gene Sets	6	R-HSA-110373	GC-NL	Resolution of AP sites via the multiple-nucleotide patch replacement pathway	-5.7	8.7	7.5	30286	26	1076	8	0.74	0.26	142|2237|5111|5424|5981|5982|5984|54107	PARP1|FEN1|PCNA|POLD1|RFC1|RFC2|RFC4|POLE3	-4.2
Reactome Gene Sets	6	R-HSA-110373	GASTRITIS	Resolution of AP sites via the multiple-nucleotide patch replacement pathway	-4.6	9.7	6.9	30286	26	724	6	0.83	0.34	142|2237|5111|5424|5982|6117	PARP1|FEN1|PCNA|POLD1|RFC2|RPA1	-3.7
Reactome Gene Sets	6	R-HSA-110373	IM-LGD-L	Resolution of AP sites via the multiple-nucleotide patch replacement pathway	-2.8	5.8	4.5	30286	26	1012	5	0.49	0.22	5111|5424|5425|5982|6118	PCNA|POLD1|POLD2|RFC2|RPA2	-2.3
Reactome Gene Sets	6	R-HSA-2500257	EGC-L	Resolution of Sister Chromatid Cohesion	-2.7	2.5	3.6	30286	127	1217	13	1.1	0.29	983|1783|5048|5903|5905|8243|9126|10382|10726|22919|55920|81027|84617	CDK1|DYNC1LI2|PAFAH1B1|RANBP2|RANGAP1|SMC1A|SMC3|TUBB4A|NUDC|MAPRE1|RCC2|TUBB1|TUBB6	-2.2
Reactome Gene Sets	6	R-HSA-611105	GASTRITIS	Respiratory electron transport	-49	18	29	30286	112	724	49	6.8	0.93	1327|1329|1345|1350|1537|2108|2109|2110|2805|2806|4191|4513|4697|4698|4700|4701|4702|4704|4705|4707|4709|4713|4714|4715|4716|4718|4720|4722|4723|4724|4725|4726|4728|4729|6341|6390|6834|7381|7384|7385|7386|7388|9167|9377|10128|27089|51204|80219|126328	COX4I1|COX5B|COX6C|COX7C|CYC1|ETFA|ETFB|ETFDH|GOT1|GOT2|MDH2|COX2|NDUFA4|NDUFA5|NDUFA6|NDUFA7|NDUFA8|NDUFA9|NDUFA10|NDUFB1|NDUFB3|NDUFB7|NDUFB8|NDUFB9|NDUFB10|NDUFC2|NDUFS2|NDUFS3|NDUFV1|NDUFS4|NDUFS5|NDUFS6|NDUFS8|NDUFV2|SCO1|SDHB|SURF1|UQCRB|UQCRC1|UQCRC2|UQCRFS1|UQCRH|COX7A2L|COX5A|LRPPRC|UQCRQ|TACO1|COQ10B|NDUFA11	-46
Reactome Gene Sets	6	R-HSA-611105	GC-L	Respiratory electron transport	-15	14	15	30286	112	336	18	5.4	1.2	1327|1345|1350|1537|4190|4513|4698|4704|4709|4712|4714|4718|4720|4722|6341|6834|7386|27089	COX4I1|COX6C|COX7C|CYC1|MDH1|COX2|NDUFA5|NDUFA9|NDUFB3|NDUFB6|NDUFB8|NDUFC2|NDUFS2|NDUFS3|SCO1|SURF1|UQCRFS1|UQCRQ	-14
Reactome Gene Sets	6	R-HSA-611105	IM-LGD-NL	Respiratory electron transport	-31	24	25	30286	112	333	29	8.7	1.5	1327|1345|4513|4700|4701|4702|4704|4707|4709|4714|4715|4716|4720|4722|4723|4724|4725|4726|4729|4731|7381|7384|7385|7386|7388|9377|27089|28976|126328	COX4I1|COX6C|COX2|NDUFA6|NDUFA7|NDUFA8|NDUFA9|NDUFB1|NDUFB3|NDUFB8|NDUFB9|NDUFB10|NDUFS2|NDUFS3|NDUFV1|NDUFS4|NDUFS5|NDUFS6|NDUFV2|NDUFV3|UQCRB|UQCRC1|UQCRC2|UQCRFS1|UQCRH|COX5A|UQCRQ|ACAD9|NDUFA11	-28
Reactome Gene Sets	6	R-HSA-611105	IM-LGD-L	Respiratory electron transport	-58	16	30	30286	112	1012	60	5.9	0.74	1327|1329|1337|1340|1345|1350|1537|2108|2109|2110|2805|2806|4190|4191|4513|4694|4695|4697|4698|4700|4701|4702|4704|4705|4707|4709|4712|4713|4714|4715|4716|4718|4720|4722|4723|4724|4725|4726|4728|4729|6341|6390|6834|7381|7384|7385|7386|7388|8402|9167|9377|9997|10128|27089|28976|51204|55967|79133|126328|374291	COX4I1|COX5B|COX6A1|COX6B1|COX6C|COX7C|CYC1|ETFA|ETFB|ETFDH|GOT1|GOT2|MDH1|MDH2|COX2|NDUFA1|NDUFA2|NDUFA4|NDUFA5|NDUFA6|NDUFA7|NDUFA8|NDUFA9|NDUFA10|NDUFB1|NDUFB3|NDUFB6|NDUFB7|NDUFB8|NDUFB9|NDUFB10|NDUFC2|NDUFS2|NDUFS3|NDUFV1|NDUFS4|NDUFS5|NDUFS6|NDUFS8|NDUFV2|SCO1|SDHB|SURF1|UQCRB|UQCRC1|UQCRC2|UQCRFS1|UQCRH|SLC25A11|COX7A2L|COX5A|SCO2|LRPPRC|UQCRQ|ACAD9|TACO1|NDUFA12|NDUFAF5|NDUFA11|NDUFS7	-55
Reactome Gene Sets	6	R-HSA-611105	GC-NL	Respiratory electron transport	-53	15	28	30286	112	1076	58	5.4	0.69	1327|1329|1340|1345|1350|1537|2108|2109|2110|2805|2806|4190|4191|4513|4694|4695|4697|4698|4700|4701|4702|4704|4705|4707|4709|4713|4714|4715|4716|4718|4720|4722|4723|4724|4725|4726|4728|4729|6341|6390|6834|7381|7384|7385|7386|7388|8402|9167|9377|9997|27089|28976|29078|51204|55967|79133|80219|126328	COX4I1|COX5B|COX6B1|COX6C|COX7C|CYC1|ETFA|ETFB|ETFDH|GOT1|GOT2|MDH1|MDH2|COX2|NDUFA1|NDUFA2|NDUFA4|NDUFA5|NDUFA6|NDUFA7|NDUFA8|NDUFA9|NDUFA10|NDUFB1|NDUFB3|NDUFB7|NDUFB8|NDUFB9|NDUFB10|NDUFC2|NDUFS2|NDUFS3|NDUFV1|NDUFS4|NDUFS5|NDUFS6|NDUFS8|NDUFV2|SCO1|SDHB|SURF1|UQCRB|UQCRC1|UQCRC2|UQCRFS1|UQCRH|SLC25A11|COX7A2L|COX5A|SCO2|UQCRQ|ACAD9|NDUFAF4|TACO1|NDUFA12|NDUFAF5|COQ10B|NDUFA11	-50
Reactome Gene Sets	6	R-HSA-611105	EGC-L	Respiratory electron transport	-47	12	25	30286	112	1217	56	4.6	0.6	1327|1329|1340|1345|1350|1537|2108|2109|2110|2805|2806|4190|4513|4694|4695|4697|4698|4700|4701|4702|4704|4705|4707|4709|4712|4713|4714|4715|4716|4718|4720|4722|4723|4724|4725|4726|4728|4729|4731|6341|6390|6834|7381|7384|7385|7386|7388|8402|9167|9377|9997|27089|28976|55967|79133|126328	COX4I1|COX5B|COX6B1|COX6C|COX7C|CYC1|ETFA|ETFB|ETFDH|GOT1|GOT2|MDH1|COX2|NDUFA1|NDUFA2|NDUFA4|NDUFA5|NDUFA6|NDUFA7|NDUFA8|NDUFA9|NDUFA10|NDUFB1|NDUFB3|NDUFB6|NDUFB7|NDUFB8|NDUFB9|NDUFB10|NDUFC2|NDUFS2|NDUFS3|NDUFV1|NDUFS4|NDUFS5|NDUFS6|NDUFS8|NDUFV2|NDUFV3|SCO1|SDHB|SURF1|UQCRB|UQCRC1|UQCRC2|UQCRFS1|UQCRH|SLC25A11|COX7A2L|COX5A|SCO2|UQCRQ|ACAD9|NDUFA12|NDUFAF5|NDUFA11	-45
Reactome Gene Sets	6	R-HSA-163200	GASTRITIS	Respiratory electron transport, ATP synthesis by chemiosmotic coupling, and heat production by uncoupling proteins.	-57	18	31	30286	136	724	58	8	1	506|513|514|515|522|539|1327|1329|1345|1350|1537|2108|2109|2110|2805|2806|4191|4509|4513|4697|4698|4700|4701|4702|4704|4705|4707|4709|4713|4714|4715|4716|4718|4720|4722|4723|4724|4725|4726|4728|4729|6341|6390|6834|7381|7384|7385|7386|7388|9167|9377|10128|10632|27089|27109|51204|80219|126328	ATP5F1B|ATP5F1D|ATP5F1E|ATP5PB|ATP5PF|ATP5PO|COX4I1|COX5B|COX6C|COX7C|CYC1|ETFA|ETFB|ETFDH|GOT1|GOT2|MDH2|ATP8|COX2|NDUFA4|NDUFA5|NDUFA6|NDUFA7|NDUFA8|NDUFA9|NDUFA10|NDUFB1|NDUFB3|NDUFB7|NDUFB8|NDUFB9|NDUFB10|NDUFC2|NDUFS2|NDUFS3|NDUFV1|NDUFS4|NDUFS5|NDUFS6|NDUFS8|NDUFV2|SCO1|SDHB|SURF1|UQCRB|UQCRC1|UQCRC2|UQCRFS1|UQCRH|COX7A2L|COX5A|LRPPRC|ATP5MG|UQCRQ|DMAC2L|TACO1|COQ10B|NDUFA11	-54
Reactome Gene Sets	6	R-HSA-163200	GC-L	Respiratory electron transport, ATP synthesis by chemiosmotic coupling, and heat production by uncoupling proteins.	-16	13	15	30286	136	336	20	6	1.3	515|1327|1345|1350|1537|4190|4509|4513|4698|4704|4709|4712|4714|4718|4720|4722|6341|6834|7386|27089	ATP5PB|COX4I1|COX6C|COX7C|CYC1|MDH1|ATP8|COX2|NDUFA5|NDUFA9|NDUFB3|NDUFB6|NDUFB8|NDUFC2|NDUFS2|NDUFS3|SCO1|SURF1|UQCRFS1|UQCRQ	-14
Reactome Gene Sets	6	R-HSA-163200	IM-LGD-NL	Respiratory electron transport, ATP synthesis by chemiosmotic coupling, and heat production by uncoupling proteins.	-30	20	23	30286	136	333	30	9	1.6	1327|1345|4513|4700|4701|4702|4704|4707|4709|4714|4715|4716|4720|4722|4723|4724|4725|4726|4729|4731|7381|7384|7385|7386|7388|9377|27089|27109|28976|126328	COX4I1|COX6C|COX2|NDUFA6|NDUFA7|NDUFA8|NDUFA9|NDUFB1|NDUFB3|NDUFB8|NDUFB9|NDUFB10|NDUFS2|NDUFS3|NDUFV1|NDUFS4|NDUFS5|NDUFS6|NDUFV2|NDUFV3|UQCRB|UQCRC1|UQCRC2|UQCRFS1|UQCRH|COX5A|UQCRQ|DMAC2L|ACAD9|NDUFA11	-27
Reactome Gene Sets	6	R-HSA-163200	IM-LGD-L	Respiratory electron transport, ATP synthesis by chemiosmotic coupling, and heat production by uncoupling proteins.	-65	15	31	30286	136	1012	70	6.9	0.8	506|513|514|515|521|522|539|1327|1329|1337|1340|1345|1350|1537|2108|2109|2110|2805|2806|4190|4191|4509|4513|4694|4695|4697|4698|4700|4701|4702|4704|4705|4707|4709|4712|4713|4714|4715|4716|4718|4720|4722|4723|4724|4725|4726|4728|4729|6341|6390|6834|7381|7384|7385|7386|7388|8402|9167|9377|9997|10128|10632|27089|27109|28976|51204|55967|79133|126328|374291	ATP5F1B|ATP5F1D|ATP5F1E|ATP5PB|ATP5ME|ATP5PF|ATP5PO|COX4I1|COX5B|COX6A1|COX6B1|COX6C|COX7C|CYC1|ETFA|ETFB|ETFDH|GOT1|GOT2|MDH1|MDH2|ATP8|COX2|NDUFA1|NDUFA2|NDUFA4|NDUFA5|NDUFA6|NDUFA7|NDUFA8|NDUFA9|NDUFA10|NDUFB1|NDUFB3|NDUFB6|NDUFB7|NDUFB8|NDUFB9|NDUFB10|NDUFC2|NDUFS2|NDUFS3|NDUFV1|NDUFS4|NDUFS5|NDUFS6|NDUFS8|NDUFV2|SCO1|SDHB|SURF1|UQCRB|UQCRC1|UQCRC2|UQCRFS1|UQCRH|SLC25A11|COX7A2L|COX5A|SCO2|LR…	-63
Reactome Gene Sets	6	R-HSA-163200	GC-NL	Respiratory electron transport, ATP synthesis by chemiosmotic coupling, and heat production by uncoupling proteins.	-61	14	29	30286	136	1076	68	6.3	0.74	506|513|514|515|521|522|539|1327|1329|1340|1345|1350|1537|2108|2109|2110|2805|2806|4190|4191|4509|4513|4694|4695|4697|4698|4700|4701|4702|4704|4705|4707|4709|4713|4714|4715|4716|4718|4720|4722|4723|4724|4725|4726|4728|4729|6341|6390|6834|7381|7384|7385|7386|7388|8402|9167|9377|9997|10632|27089|27109|28976|29078|51204|55967|79133|80219|126328	ATP5F1B|ATP5F1D|ATP5F1E|ATP5PB|ATP5ME|ATP5PF|ATP5PO|COX4I1|COX5B|COX6B1|COX6C|COX7C|CYC1|ETFA|ETFB|ETFDH|GOT1|GOT2|MDH1|MDH2|ATP8|COX2|NDUFA1|NDUFA2|NDUFA4|NDUFA5|NDUFA6|NDUFA7|NDUFA8|NDUFA9|NDUFA10|NDUFB1|NDUFB3|NDUFB7|NDUFB8|NDUFB9|NDUFB10|NDUFC2|NDUFS2|NDUFS3|NDUFV1|NDUFS4|NDUFS5|NDUFS6|NDUFS8|NDUFV2|SCO1|SDHB|SURF1|UQCRB|UQCRC1|UQCRC2|UQCRFS1|UQCRH|SLC25A11|COX7A2L|COX5A|SCO2|ATP5MG|UQCRQ|DMA…	-58
Reactome Gene Sets	6	R-HSA-163200	EGC-L	Respiratory electron transport, ATP synthesis by chemiosmotic coupling, and heat production by uncoupling proteins.	-53	12	26	30286	136	1217	65	5.3	0.64	506|513|514|515|521|522|539|1327|1329|1340|1345|1350|1537|2108|2109|2110|2805|2806|4190|4509|4513|4694|4695|4697|4698|4700|4701|4702|4704|4705|4707|4709|4712|4713|4714|4715|4716|4718|4720|4722|4723|4724|4725|4726|4728|4729|4731|6341|6390|6834|7381|7384|7385|7386|7388|8402|9167|9377|9997|10632|27089|28976|55967|79133|126328	ATP5F1B|ATP5F1D|ATP5F1E|ATP5PB|ATP5ME|ATP5PF|ATP5PO|COX4I1|COX5B|COX6B1|COX6C|COX7C|CYC1|ETFA|ETFB|ETFDH|GOT1|GOT2|MDH1|ATP8|COX2|NDUFA1|NDUFA2|NDUFA4|NDUFA5|NDUFA6|NDUFA7|NDUFA8|NDUFA9|NDUFA10|NDUFB1|NDUFB3|NDUFB6|NDUFB7|NDUFB8|NDUFB9|NDUFB10|NDUFC2|NDUFS2|NDUFS3|NDUFV1|NDUFS4|NDUFS5|NDUFS6|NDUFS8|NDUFV2|NDUFV3|SCO1|SDHB|SURF1|UQCRB|UQCRC1|UQCRC2|UQCRFS1|UQCRH|SLC25A11|COX7A2L|COX5A|SCO2|ATP5MG|…	-50
Reactome Gene Sets	6	R-HSA-9820965	EGC-L	Respiratory syncytial virus (RSV) genome replication, transcription and translation	-5.9	11	8.1	30286	16	1217	7	0.58	0.22	3312|3320|3326|9789|23478|60559|90701	HSPA8|HSP90AA1|HSP90AB1|SPCS2|SEC11A|SPCS3|SEC11C	-4.8
Reactome Gene Sets	6	R-HSA-9820965	GASTRITIS	Respiratory syncytial virus (RSV) genome replication, transcription and translation	-2.2	7.8	4.3	30286	16	724	3	0.41	0.24	3320|3326|60559	HSP90AA1|HSP90AB1|SPCS3	-1.8
Reactome Gene Sets	6	R-HSA-9820952	EGC-L	Respiratory Syncytial Virus Infection Pathway	-2.5	2.5	3.3	30286	120	1217	12	0.99	0.28	929|3312|3320|3326|4691|5869|6923|9789|10134|23478|60559|90701	CD14|HSPA8|HSP90AA1|HSP90AB1|NCL|RAB5B|ELOB|SPCS2|BCAP31|SEC11A|SPCS3|SEC11C	-2
Reactome Gene Sets	6	R-HSA-9633012	GC-NL	Response of EIF2AK4 (GCN2) to amino acid deficiency	-3.6	3.3	4.5	30286	102	1076	12	1.1	0.32	2197|4736|6146|6169|6170|6193|6209|6210|6233|6235|9349|23521	FAU|RPL10A|RPL22|RPL38|RPL39|RPS5|RPS15|RPS15A|RPS27A|RPS29|RPL23|RPL13A	-2.5
Reactome Gene Sets	6	R-HSA-9633012	EGC-L	Response of EIF2AK4 (GCN2) to amino acid deficiency	-4.2	3.4	5	30286	102	1217	14	1.2	0.31	1968|4736|6122|6134|6135|6136|6139|6146|6188|6193|6210|6231|8894|23521	EIF2S3|RPL10A|RPL3|RPL10|RPL11|RPL12|RPL17|RPL22|RPS3|RPS5|RPS15A|RPS26|EIF2S2|RPL13A	-3.4
Reactome Gene Sets	6	R-HSA-9637690	GASTRITIS	Response of Mtb to phagocytosis	-2.7	7.3	4.7	30286	23	724	4	0.55	0.28	3837|6421|11151|57674	KPNB1|SFPQ|CORO1A|RNF213	-2.2
Reactome Gene Sets	6	R-HSA-76005	EGC-L	Response to elevated platelet cytosolic Ca2+	-9.9	4.6	8.6	30286	134	1217	25	2.1	0.41	1|2|226|335|710|2162|2243|2244|3273|3674|3699|5216|5340|5473|5627|5768|6678|7018|7057|7094|51097|51706|54495|83706|139322	A1BG|A2M|ALDOA|APOA1|SERPING1|F13A1|FGA|FGB|HRG|ITGA2B|ITIH3|PFN1|PLG|PPBP|PROS1|QSOX1|SPARC|TF|THBS1|TLN1|SCCPDH|CYB5R1|TMX3|FERMT3|APOOL	-8.5
Reactome Gene Sets	6	R-HSA-76005	GC-L	Response to elevated platelet cytosolic Ca2+	-3.1	4.7	4.6	30286	134	336	7	2.1	0.78	5341|6678|7450|7873|51097|51706|139322	PLEK|SPARC|VWF|MANF|SCCPDH|CYB5R1|APOOL	-2.5
Reactome Gene Sets	6	R-HSA-76005	GASTRITIS	Response to elevated platelet cytosolic Ca2+	-3.4	3.4	4.4	30286	134	724	11	1.5	0.45	2162|3309|5005|5267|5341|7094|7450|7873|51706|83706|139322	F13A1|HSPA5|ORM2|SERPINA4|PLEK|TLN1|VWF|MANF|CYB5R1|FERMT3|APOOL	-2.8
Reactome Gene Sets	6	R-HSA-76005	IM-LGD-NL	Response to elevated platelet cytosolic Ca2+	-3.9	5.4	5.4	30286	134	333	8	2.4	0.84	3699|6810|7057|7094|7450|51097|51706|83706	ITIH3|STX4|THBS1|TLN1|VWF|SCCPDH|CYB5R1|FERMT3	-2.8
Reactome Gene Sets	6	R-HSA-76005	IM-LGD-L	Response to elevated platelet cytosolic Ca2+	-18	7.1	13	30286	134	1012	32	3.2	0.55	1|2|12|197|335|710|1072|1191|1893|2243|2244|3273|3674|3699|5004|5005|5216|5265|5340|5473|5627|7018|7057|7076|7450|7873|10447|23052|51097|51706|83706|139322	A1BG|A2M|SERPINA3|AHSG|APOA1|SERPING1|CFL1|CLU|ECM1|FGA|FGB|HRG|ITGA2B|ITIH3|ORM1|ORM2|PFN1|SERPINA1|PLG|PPBP|PROS1|TF|THBS1|TIMP1|VWF|MANF|FAM3C|ENDOD1|SCCPDH|CYB5R1|FERMT3|APOOL	-16
Reactome Gene Sets	6	R-HSA-76005	GC-NL	Response to elevated platelet cytosolic Ca2+	-10	5	9	30286	134	1076	24	2.2	0.45	1|2|710|1893|2243|2244|2316|3273|3699|5004|5265|5340|5341|5473|5627|5768|6678|7057|7094|7450|51097|51706|83706|139322	A1BG|A2M|SERPING1|ECM1|FGA|FGB|FLNA|HRG|ITIH3|ORM1|SERPINA1|PLG|PLEK|PPBP|PROS1|QSOX1|SPARC|THBS1|TLN1|VWF|SCCPDH|CYB5R1|FERMT3|APOOL	-8.4
Reactome Gene Sets	6	R-HSA-975634	IM-LGD-L	Retinoid metabolism and transport	-5.8	6.8	7.2	30286	44	1012	10	0.99	0.31	335|336|337|338|344|345|348|5948|5950|51109	APOA1|APOA2|APOA4|APOB|APOC2|APOC3|APOE|RBP2|RBP4|RDH11	-4.8
Reactome Gene Sets	6	R-HSA-975634	GC-NL	Retinoid metabolism and transport	-2.4	3.8	3.6	30286	44	1076	6	0.56	0.23	338|344|345|348|8644|57016	APOB|APOC2|APOC3|APOE|AKR1C3|AKR1B10	-1.6
Reactome Gene Sets	6	R-HSA-975634	EGC-L	Retinoid metabolism and transport	-2.8	4	4	30286	44	1217	7	0.58	0.22	335|337|338|344|345|348|51109	APOA1|APOA4|APOB|APOC2|APOC3|APOE|RDH11	-2.3
Reactome Gene Sets	6	R-HSA-1475029	IM-LGD-L	Reversible hydration of carbon dioxide	-2.2	7.5	4.2	30286	12	1012	3	0.3	0.17	768|11238|377677	CA9|CA5B|CA13	-1.8
Reactome Gene Sets	6	R-HSA-165054	EGC-L	Rev-mediated nuclear export of HIV RNA	-7.3	8.1	8.4	30286	34	1217	11	0.9	0.27	1104|4927|5901|5902|5903|5905|7175|8086|8480|10762|53371	RCC1|NUP88|RAN|RANBP1|RANBP2|RANGAP1|TPR|AAAS|RAE1|NUP50|NUP54	-6.1
Reactome Gene Sets	6	R-HSA-165054	IM-LGD-L	Rev-mediated nuclear export of HIV RNA	-3.1	5.3	4.6	30286	34	1012	6	0.59	0.24	4927|5901|5902|5905|8480|10762	NUP88|RAN|RANBP1|RANGAP1|RAE1|NUP50	-2.5
Reactome Gene Sets	6	R-HSA-165054	GC-NL	Rev-mediated nuclear export of HIV RNA	-2.9	5	4.4	30286	34	1076	6	0.56	0.23	1104|5901|7175|8086|8480|53371	RCC1|RAN|TPR|AAAS|RAE1|NUP54	-2
Reactome Gene Sets	6	R-HSA-9012999	GASTRITIS	RHO GTPase cycle	-13	3.8	9.4	30286	449	724	41	5.7	0.86	391|397|1152|1445|1536|1629|1794|2185|2631|3163|3320|3326|3954|4001|4162|4698|4722|5880|6793|7037|7171|7415|7431|7456|8027|8976|10211|10250|23048|23075|23513|23526|23592|25813|50619|55240|56254|56667|84681|121512|157769	RHOG|ARHGDIB|CKB|CSK|CYBB|DBT|DOCK2|PTK2B|NIPSNAP2|HMOX2|HSP90AA1|HSP90AB1|LETM1|LMNB1|MCAM|NDUFA5|NDUFS3|RAC2|STK10|TFRC|TPM4|VCP|VIM|WIPF1|STAM|WASL|FLOT1|SRRM1|FNBP1|SWAP70|SCRIB|ARHGAP45|LEMD3|SAMM50|DEF6|STEAP3|RNF20|MUC13|HINT2|FGD4|FAM91A1	-11
Reactome Gene Sets	6	R-HSA-9012999	EGC-L	RHO GTPase cycle	-12	2.9	8.5	30286	449	1217	53	4.4	0.59	224|388|397|1152|1445|1536|1629|2040|2631|3163|3320|3326|3336|3954|3998|4001|4162|4698|4722|5062|5880|6472|6793|7037|7112|7171|7431|7456|8027|8086|8826|9138|9217|9826|10134|10250|10424|10726|10787|10788|10970|11140|23075|23191|23256|23592|25813|55240|56254|56667|79869|84681|121512	ALDH3A2|RHOB|ARHGDIB|CKB|CSK|CYBB|DBT|STOM|NIPSNAP2|HMOX2|HSP90AA1|HSP90AB1|HSPE1|LETM1|LMAN1|LMNB1|MCAM|NDUFA5|NDUFS3|PAK2|RAC2|SHMT2|STK10|TFRC|TMPO|TPM4|VIM|WIPF1|STAM|AAAS|IQGAP1|ARHGEF1|VAPB|ARHGEF11|BCAP31|SRRM1|PGRMC2|NUDC|NCKAP1|IQGAP2|CKAP4|CDC37|SWAP70|CYFIP1|SCFD1|LEMD3|SAMM50|STEAP3|RNF20|MUC13|CPSF7|HINT2|FGD4	-10
Reactome Gene Sets	6	R-HSA-9012999	GC-NL	RHO GTPase cycle	-11	3	8.2	30286	449	1076	48	4.5	0.63	391|397|1152|1213|1445|1536|1629|2040|2631|3163|3326|3954|3998|4001|4162|4698|4722|5062|5880|6793|7037|7170|7171|7431|7454|7456|8027|8086|8776|8826|10250|10726|10787|10788|11135|11140|23075|23344|23526|23592|25813|50619|51138|55240|56254|56667|84681|121512	RHOG|ARHGDIB|CKB|CLTC|CSK|CYBB|DBT|STOM|NIPSNAP2|HMOX2|HSP90AB1|LETM1|LMAN1|LMNB1|MCAM|NDUFA5|NDUFS3|PAK2|RAC2|STK10|TFRC|TPM3|TPM4|VIM|WAS|WIPF1|STAM|AAAS|MTMR1|IQGAP1|SRRM1|NUDC|NCKAP1|IQGAP2|CDC42EP1|CDC37|SWAP70|ESYT1|ARHGAP45|LEMD3|SAMM50|DEF6|COPS4|STEAP3|RNF20|MUC13|HINT2|FGD4	-9
Reactome Gene Sets	6	R-HSA-9012999	IM-LGD-L	RHO GTPase cycle	-6.7	2.5	6.1	30286	449	1012	38	3.8	0.6	397|1152|1445|1629|2010|2631|3320|3954|3998|4001|4580|4698|4722|5880|7037|7454|7919|8027|8976|9826|10250|10424|10726|10788|10970|11135|11140|11329|23075|23092|23513|23592|25813|56254|56667|79869|84681|121512	ARHGDIB|CKB|CSK|DBT|EMD|NIPSNAP2|HSP90AA1|LETM1|LMAN1|LMNB1|MTX1|NDUFA5|NDUFS3|RAC2|TFRC|WAS|DDX39B|STAM|WASL|ARHGEF11|SRRM1|PGRMC2|NUDC|IQGAP2|CKAP4|CDC42EP1|CDC37|STK38|SWAP70|ARHGAP26|SCRIB|LEMD3|SAMM50|RNF20|MUC13|CPSF7|HINT2|FGD4	-5.6
Reactome Gene Sets	6	R-HSA-9012999	GC-L	RHO GTPase cycle	-2.3	2.4	3.2	30286	449	336	12	3.6	1	2040|3954|4162|4698|4722|8776|11135|23075|23592|25813|50619|56254	STOM|LETM1|MCAM|NDUFA5|NDUFS3|MTMR1|CDC42EP1|SWAP70|LEMD3|SAMM50|DEF6|RNF20	-1.9
Reactome Gene Sets	6	R-HSA-9012999	IM-LGD-NL	RHO GTPase cycle	-6.2	3.8	6.4	30286	449	333	19	5.7	1.3	397|1445|1536|1629|3326|4162|4722|5880|7037|7171|7454|7456|8027|8086|10788|50619|55240|84681|157769	ARHGDIB|CSK|CYBB|DBT|HSP90AB1|MCAM|NDUFS3|RAC2|TFRC|TPM4|WAS|WIPF1|STAM|AAAS|IQGAP2|DEF6|STEAP3|HINT2|FAM91A1	-4.6
Reactome Gene Sets	6	R-HSA-195258	EGC-L	RHO GTPase Effectors	-5	2.4	5.1	30286	326	1217	31	2.5	0.45	388|1536|1783|4627|4637|5048|5062|5216|5217|5580|5880|5903|5905|6279|6280|7456|7534|8826|10095|10382|10552|10726|10787|10788|22919|23191|55920|81027|84617|103910|128312	RHOB|CYBB|DYNC1LI2|MYH9|MYL6|PAFAH1B1|PAK2|PFN1|PFN2|PRKCD|RAC2|RANBP2|RANGAP1|S100A8|S100A9|WIPF1|YWHAZ|IQGAP1|ARPC1B|TUBB4A|ARPC1A|NUDC|NCKAP1|IQGAP2|MAPRE1|CYFIP1|RCC2|TUBB1|TUBB6|MYL12B|H2BC26	-4.1
Reactome Gene Sets	6	R-HSA-195258	GC-NL	RHO GTPase Effectors	-3.5	2.2	4	30286	326	1076	25	2.3	0.46	391|1536|1783|2316|4627|4637|5048|5062|5217|5289|5580|5880|6279|6280|7454|7456|8826|10095|10552|10726|10787|10788|55920|84617|103910	RHOG|CYBB|DYNC1LI2|FLNA|MYH9|MYL6|PAFAH1B1|PAK2|PFN2|PIK3C3|PRKCD|RAC2|S100A8|S100A9|WAS|WIPF1|IQGAP1|ARPC1B|ARPC1A|NUDC|NCKAP1|IQGAP2|RCC2|TUBB6|MYL12B	-2.5
Reactome Gene Sets	6	R-HSA-5625900	EGC-L	RHO GTPases activate CIT	-2.1	5	3.6	30286	20	1217	4	0.33	0.16	388|4627|4637|103910	RHOB|MYH9|MYL6|MYL12B	-1.8
Reactome Gene Sets	6	R-HSA-5663220	EGC-L	RHO GTPases Activate Formins	-2.4	2.3	3.2	30286	140	1217	13	1.1	0.29	388|1783|5048|5216|5217|5903|5905|10382|10726|22919|55920|81027|84617	RHOB|DYNC1LI2|PAFAH1B1|PFN1|PFN2|RANBP2|RANGAP1|TUBB4A|NUDC|MAPRE1|RCC2|TUBB1|TUBB6	-2
Reactome Gene Sets	6	R-HSA-5626467	EGC-L	RHO GTPases activate IQGAPs	-2.1	3.9	3.3	30286	32	1217	5	0.41	0.18	8826|10382|10788|81027|84617	IQGAP1|TUBB4A|IQGAP2|TUBB1|TUBB6	-1.7
Reactome Gene Sets	6	R-HSA-5668599	GC-NL	RHO GTPases Activate NADPH Oxidases	-3.8	7	5.7	30286	24	1076	6	0.56	0.23	1536|5289|5580|5880|6279|6280	CYBB|PIK3C3|PRKCD|RAC2|S100A8|S100A9	-2.7
Reactome Gene Sets	6	R-HSA-5668599	EGC-L	RHO GTPases Activate NADPH Oxidases	-2.6	5.2	4.2	30286	24	1217	5	0.41	0.18	1536|5580|5880|6279|6280	CYBB|PRKCD|RAC2|S100A8|S100A9	-2.2
Reactome Gene Sets	6	R-HSA-5668599	IM-LGD-NL	RHO GTPases Activate NADPH Oxidases	-2.6	11	5.4	30286	24	333	3	0.9	0.52	1536|5880|6279	CYBB|RAC2|S100A8	-1.8
Reactome Gene Sets	6	R-HSA-5627123	GC-NL	RHO GTPases activate PAKs	-2.9	5.9	4.6	30286	24	1076	5	0.46	0.21	2316|4627|4637|5062|103910	FLNA|MYH9|MYL6|PAK2|MYL12B	-2
Reactome Gene Sets	6	R-HSA-5627117	EGC-L	RHO GTPases Activate ROCKs	-2.1	5	3.6	30286	20	1217	4	0.33	0.16	388|4627|4637|103910	RHOB|MYH9|MYL6|MYL12B	-1.8
Reactome Gene Sets	6	R-HSA-5663213	IM-LGD-L	RHO GTPases Activate WASPs and WAVEs	-2.2	4.2	3.5	30286	36	1012	5	0.49	0.22	7454|8976|10095|10109|10552	WAS|WASL|ARPC1B|ARPC2|ARPC1A	-1.8
Reactome Gene Sets	6	R-HSA-5663213	GC-NL	RHO GTPases Activate WASPs and WAVEs	-2.1	3.9	3.4	30286	36	1076	5	0.46	0.21	7454|7456|10095|10552|10787	WAS|WIPF1|ARPC1B|ARPC1A|NCKAP1	-1.3
Reactome Gene Sets	6	R-HSA-8980692	EGC-L	RHOA GTPase cycle	-3.5	2.7	4.2	30286	147	1217	16	1.3	0.33	397|2040|3163|3998|4162|6793|7037|7112|8086|8826|9138|9217|9826|10134|10424|23256	ARHGDIB|STOM|HMOX2|LMAN1|MCAM|STK10|TFRC|TMPO|AAAS|IQGAP1|ARHGEF1|VAPB|ARHGEF11|BCAP31|PGRMC2|SCFD1	-2.9
Reactome Gene Sets	6	R-HSA-8980692	GASTRITIS	RHOA GTPase cycle	-2	2.6	3	30286	147	724	9	1.2	0.41	397|1794|3163|4162|6793|7037|10211|23526|50619	ARHGDIB|DOCK2|HMOX2|MCAM|STK10|TFRC|FLOT1|ARHGAP45|DEF6	-1.7
Reactome Gene Sets	6	R-HSA-9706574	IM-LGD-L	RHOBTB GTPase Cycle	-3.9	6	5.5	30286	35	1012	7	0.69	0.26	3320|7919|10250|11140|11329|56254|79869	HSP90AA1|DDX39B|SRRM1|CDC37|STK38|RNF20|CPSF7	-3.2
Reactome Gene Sets	6	R-HSA-9706574	GASTRITIS	RHOBTB GTPase Cycle	-2.9	6	4.6	30286	35	724	5	0.69	0.31	3320|3326|7431|10250|56254	HSP90AA1|HSP90AB1|VIM|SRRM1|RNF20	-2.3
Reactome Gene Sets	6	R-HSA-9706574	EGC-L	RHOBTB GTPase Cycle	-3.4	5	4.8	30286	35	1217	7	0.58	0.22	3320|3326|7431|10250|11140|56254|79869	HSP90AA1|HSP90AB1|VIM|SRRM1|CDC37|RNF20|CPSF7	-2.8
Reactome Gene Sets	6	R-HSA-9706574	GC-NL	RHOBTB GTPase Cycle	-2.9	4.8	4.3	30286	35	1076	6	0.56	0.23	3326|7431|10250|11140|51138|56254	HSP90AB1|VIM|SRRM1|CDC37|COPS4|RNF20	-2
Reactome Gene Sets	6	R-HSA-9013422	IM-LGD-L	RHOBTB1 GTPase cycle	-2.2	5.2	3.8	30286	23	1012	4	0.4	0.2	10250|11329|56254|79869	SRRM1|STK38|RNF20|CPSF7	-1.8
Reactome Gene Sets	6	R-HSA-9013422	GC-NL	RHOBTB1 GTPase cycle	-2.1	4.9	3.6	30286	23	1076	4	0.37	0.19	7431|10250|51138|56254	VIM|SRRM1|COPS4|RNF20	-1.4
Reactome Gene Sets	6	R-HSA-9013418	IM-LGD-L	RHOBTB2 GTPase cycle	-3.1	6.5	4.9	30286	23	1012	5	0.49	0.22	3320|7919|10250|11140|11329	HSP90AA1|DDX39B|SRRM1|CDC37|STK38	-2.5
Reactome Gene Sets	6	R-HSA-9013106	EGC-L	RHOC GTPase cycle	-3.1	3.4	4.2	30286	74	1217	10	0.82	0.26	2040|3998|4162|6793|7037|7112|8826|9138|9217|9826	STOM|LMAN1|MCAM|STK10|TFRC|TMPO|IQGAP1|ARHGEF1|VAPB|ARHGEF11	-2.6
Reactome Gene Sets	6	R-HSA-9013405	EGC-L	RHOD GTPase cycle	-3.6	4.1	4.7	30286	54	1217	9	0.74	0.25	3998|4001|4162|7112|9217|10424|23592|55240|84681	LMAN1|LMNB1|MCAM|TMPO|VAPB|PGRMC2|LEMD3|STEAP3|HINT2	-2.9
Reactome Gene Sets	6	R-HSA-9013405	GASTRITIS	RHOD GTPase cycle	-2	3.9	3.3	30286	54	724	5	0.69	0.31	4001|4162|23592|55240|84681	LMNB1|MCAM|LEMD3|STEAP3|HINT2	-1.7
Reactome Gene Sets	6	R-HSA-9013405	IM-LGD-L	RHOD GTPase cycle	-2.7	3.9	3.9	30286	54	1012	7	0.69	0.26	2010|3998|4001|10424|23092|23592|84681	EMD|LMAN1|LMNB1|PGRMC2|ARHGAP26|LEMD3|HINT2	-2.2
Reactome Gene Sets	6	R-HSA-9013405	GC-NL	RHOD GTPase cycle	-2.5	3.6	3.7	30286	54	1076	7	0.65	0.25	3998|4001|4162|23344|23592|55240|84681	LMAN1|LMNB1|MCAM|ESYT1|LEMD3|STEAP3|HINT2	-1.7
Reactome Gene Sets	6	R-HSA-9013408	EGC-L	RHOG GTPase cycle	-7.5	5.4	7.7	30286	74	1217	16	1.3	0.33	397|3336|3954|3998|4162|4698|4722|5062|6472|7037|7112|9217|10424|10788|23191|23592	ARHGDIB|HSPE1|LETM1|LMAN1|MCAM|NDUFA5|NDUFS3|PAK2|SHMT2|TFRC|TMPO|VAPB|PGRMC2|IQGAP2|CYFIP1|LEMD3	-6.3
Reactome Gene Sets	6	R-HSA-9013408	GC-NL	RHOG GTPase cycle	-5.7	4.9	6.5	30286	74	1076	13	1.2	0.33	391|397|3954|3998|4162|4698|4722|5062|7037|10788|11135|23344|23592	RHOG|ARHGDIB|LETM1|LMAN1|MCAM|NDUFA5|NDUFS3|PAK2|TFRC|IQGAP2|CDC42EP1|ESYT1|LEMD3	-4.2
Reactome Gene Sets	6	R-HSA-9013408	GC-L	RHOG GTPase cycle	-3.8	7.3	5.8	30286	74	336	6	1.8	0.72	3954|4162|4698|4722|11135|23592	LETM1|MCAM|NDUFA5|NDUFS3|CDC42EP1|LEMD3	-3.1
Reactome Gene Sets	6	R-HSA-9013408	GASTRITIS	RHOG GTPase cycle	-4.2	5.1	5.5	30286	74	724	9	1.2	0.41	391|397|1794|3954|4162|4698|4722|7037|23592	RHOG|ARHGDIB|DOCK2|LETM1|MCAM|NDUFA5|NDUFS3|TFRC|LEMD3	-3.4
Reactome Gene Sets	6	R-HSA-9013408	IM-LGD-L	RHOG GTPase cycle	-4.5	4.4	5.5	30286	74	1012	11	1.1	0.33	397|2010|3954|3998|4698|4722|7037|10424|10788|11135|23592	ARHGDIB|EMD|LETM1|LMAN1|NDUFA5|NDUFS3|TFRC|PGRMC2|IQGAP2|CDC42EP1|LEMD3	-3.6
Reactome Gene Sets	6	R-HSA-9013408	IM-LGD-NL	RHOG GTPase cycle	-2.9	6.1	4.7	30286	74	333	5	1.5	0.67	397|4162|4722|7037|10788	ARHGDIB|MCAM|NDUFS3|TFRC|IQGAP2	-2
Reactome Gene Sets	6	R-HSA-9013407	GASTRITIS	RHOH GTPase cycle	-4.5	7.7	6.5	30286	38	724	7	0.97	0.36	397|1445|1629|2631|7037|7415|157769	ARHGDIB|CSK|DBT|NIPSNAP2|TFRC|VCP|FAM91A1	-3.7
Reactome Gene Sets	6	R-HSA-9013407	EGC-L	RHOH GTPase cycle	-3.2	4.6	4.5	30286	38	1217	7	0.58	0.22	397|1445|1629|2040|2631|5062|7037	ARHGDIB|CSK|DBT|STOM|NIPSNAP2|PAK2|TFRC	-2.6
Reactome Gene Sets	6	R-HSA-9013407	IM-LGD-NL	RHOH GTPase cycle	-4.2	12	7.1	30286	38	333	5	1.5	0.67	397|1445|1629|7037|157769	ARHGDIB|CSK|DBT|TFRC|FAM91A1	-3
Reactome Gene Sets	6	R-HSA-9013407	IM-LGD-L	RHOH GTPase cycle	-2.1	3.9	3.4	30286	38	1012	5	0.49	0.22	397|1445|1629|2631|7037	ARHGDIB|CSK|DBT|NIPSNAP2|TFRC	-1.8
Reactome Gene Sets	6	R-HSA-9013407	GC-NL	RHOH GTPase cycle	-3.5	5.2	5	30286	38	1076	7	0.65	0.25	397|1445|1629|2040|2631|5062|7037	ARHGDIB|CSK|DBT|STOM|NIPSNAP2|PAK2|TFRC	-2.4
Reactome Gene Sets	6	R-HSA-9013409	GASTRITIS	RHOJ GTPase cycle	-2.7	4.6	4.1	30286	55	724	6	0.83	0.34	2631|7037|8976|23048|23513|55240	NIPSNAP2|TFRC|WASL|FNBP1|SCRIB|STEAP3	-2.2
Reactome Gene Sets	6	R-HSA-9013409	IM-LGD-L	RHOJ GTPase cycle	-2.6	3.8	3.9	30286	55	1012	7	0.69	0.26	2631|7037|7454|8976|11135|23092|23513	NIPSNAP2|TFRC|WAS|WASL|CDC42EP1|ARHGAP26|SCRIB	-2.2
Reactome Gene Sets	6	R-HSA-9013409	GC-NL	RHOJ GTPase cycle	-2.5	3.6	3.7	30286	55	1076	7	0.65	0.25	2040|2631|5062|7037|7454|11135|55240	STOM|NIPSNAP2|PAK2|TFRC|WAS|CDC42EP1|STEAP3	-1.7
Reactome Gene Sets	6	R-HSA-72702	GC-NL	Ribosomal scanning and start codon recognition	-2.3	3.3	3.5	30286	59	1076	7	0.65	0.25	1964|2197|6193|6209|6210|6233|6235	EIF1AX|FAU|RPS5|RPS15|RPS15A|RPS27A|RPS29	-1.5
Reactome Gene Sets	6	R-HSA-72702	EGC-L	Ribosomal scanning and start codon recognition	-2	3	3.1	30286	59	1217	7	0.58	0.22	1968|1973|6188|6193|6210|6231|8894	EIF2S3|EIF4A1|RPS3|RPS5|RPS15A|RPS26|EIF2S2	-1.7
Reactome Gene Sets	6	R-HSA-674695	EGC-L	RNA Polymerase II Pre-transcription Events	-4.7	4	5.5	30286	81	1217	13	1.1	0.29	2962|2963|5434|6749|6829|6830|6917|6923|8148|11198|23168|54623|79577	GTF2F1|GTF2F2|POLR2E|SSRP1|SUPT5H|SUPT6H|TCEA1|ELOB|TAF15|SUPT16H|RTF1|PAF1|CDC73	-3.8
Reactome Gene Sets	6	R-HSA-75955	EGC-L	RNA Polymerase II Transcription Elongation	-5.6	5.1	6.5	30286	58	1217	12	0.99	0.28	2962|2963|5434|6749|6829|6830|6917|6923|11198|23168|54623|79577	GTF2F1|GTF2F2|POLR2E|SSRP1|SUPT5H|SUPT6H|TCEA1|ELOB|SUPT16H|RTF1|PAF1|CDC73	-4.6
Reactome Gene Sets	6	R-HSA-75955	GC-NL	RNA Polymerase II Transcription Elongation	-2.4	3.4	3.5	30286	58	1076	7	0.65	0.25	2962|2963|5434|6749|11198|25920|79577	GTF2F1|GTF2F2|POLR2E|SSRP1|SUPT16H|NELFB|CDC73	-1.6
Reactome Gene Sets	6	R-HSA-73856	GASTRITIS	RNA Polymerase II Transcription Termination	-6.2	6.8	7.5	30286	68	724	11	1.5	0.45	1477|1478|6428|6429|6431|6634|6636|8106|9877|10250|84324	CSTF1|CSTF2|SRSF3|SRSF4|SRSF6|SNRPD3|SNRPF|PABPN1|ZC3H11A|SRRM1|SARNP	-5.2
Reactome Gene Sets	6	R-HSA-73856	GC-NL	RNA Polymerase II Transcription Termination	-3.2	3.7	4.3	30286	68	1076	9	0.84	0.28	1478|6431|6634|8106|9877|10189|10250|11051|51692	CSTF2|SRSF6|SNRPD3|PABPN1|ZC3H11A|ALYREF|SRRM1|NUDT21|CPSF3	-2.2
Reactome Gene Sets	6	R-HSA-73856	EGC-L	RNA Polymerase II Transcription Termination	-16	8.8	13	30286	68	1217	24	2	0.4	1477|1478|6428|6429|6431|6628|6634|6636|6637|7307|8106|8683|9295|9775|10189|10250|10914|11051|11338|23283|51692|79869|80145|84324	CSTF1|CSTF2|SRSF3|SRSF4|SRSF6|SNRPB|SNRPD3|SNRPF|SNRPG|U2AF1|PABPN1|SRSF9|SRSF11|EIF4A3|ALYREF|SRRM1|PAPOLA|NUDT21|U2AF2|CSTF2T|CPSF3|CPSF7|THOC7|SARNP	-14
Reactome Gene Sets	6	R-HSA-73856	IM-LGD-L	RNA Polymerase II Transcription Termination	-11	7.9	11	30286	68	1012	18	1.8	0.42	6431|6432|6628|6636|7919|8683|9295|9775|9785|9877|9939|10250|11051|11338|51692|79869|80145|84321	SRSF6|SRSF7|SNRPB|SNRPF|DDX39B|SRSF9|SRSF11|EIF4A3|DHX38|ZC3H11A|RBM8A|SRRM1|NUDT21|U2AF2|CPSF3|CPSF7|THOC7|THOC3	-9.7
Reactome Gene Sets	6	R-HSA-9696270	IM-LGD-L	RND2 GTPase cycle	-2.5	4.2	3.9	30286	43	1012	6	0.59	0.24	7037|10726|10970|23513|23592|56667	TFRC|NUDC|CKAP4|SCRIB|LEMD3|MUC13	-2.1
Reactome Gene Sets	6	R-HSA-9696270	GASTRITIS	RND2 GTPase cycle	-2.5	4.9	4	30286	43	724	5	0.69	0.31	7037|23048|23513|23592|56667	TFRC|FNBP1|SCRIB|LEMD3|MUC13	-2
Reactome Gene Sets	6	R-HSA-9696270	EGC-L	RND2 GTPase cycle	-2.1	3.5	3.3	30286	43	1217	6	0.49	0.2	224|7037|10726|10970|23592|56667	ALDH3A2|TFRC|NUDC|CKAP4|LEMD3|MUC13	-1.8
Reactome Gene Sets	6	R-HSA-6790901	GC-NL	rRNA modification in the nucleus and cytosol	-4.3	4.6	5.4	30286	61	1076	10	0.93	0.29	2091|4809|10436|10528|10607|23160|51504|51602|55505|134430	FBL|SNU13|EMG1|NOP56|TBL3|WDR43|TRMT112|NOP58|NOP10|WDR36	-3
Reactome Gene Sets	6	R-HSA-6790901	EGC-L	rRNA modification in the nucleus and cytosol	-2.5	3.3	3.6	30286	61	1217	8	0.66	0.23	2091|4809|10436|10528|10607|51504|51602|55505	FBL|SNU13|EMG1|NOP56|TBL3|TRMT112|NOP58|NOP10	-2.1
Reactome Gene Sets	6	R-HSA-72312	EGC-L	rRNA processing	-15	4.7	11	30286	205	1217	39	3.2	0.5	705|2091|3028|4691|4736|4809|6122|6134|6135|6136|6139|6146|6188|6193|6210|6231|10436|10528|10556|10607|10969|11340|22803|23481|23517|23521|26354|28987|51010|51013|51504|51602|54512|55505|55759|56915|57418|117246|118460	BYSL|FBL|HSD17B10|NCL|RPL10A|SNU13|RPL3|RPL10|RPL11|RPL12|RPL17|RPL22|RPS3|RPS5|RPS15A|RPS26|EMG1|NOP56|RPP30|TBL3|EBNA1BP2|EXOSC8|XRN2|PES1|MTREX|RPL13A|GNL3|NOB1|EXOSC3|EXOSC1|TRMT112|NOP58|EXOSC4|NOP10|WDR12|EXOSC5|WDR18|FTSJ3|EXOSC6	-14
Reactome Gene Sets	6	R-HSA-72312	GC-NL	rRNA processing	-13	4.7	10	30286	205	1076	34	3.2	0.53	705|2091|2197|3028|4691|4736|4809|6146|6169|6170|6193|6209|6210|6233|6235|9349|10436|10528|10556|10607|10969|22803|23160|23481|23521|26354|28987|51504|51602|55505|55759|57418|117246|134430	BYSL|FBL|FAU|HSD17B10|NCL|RPL10A|SNU13|RPL22|RPL38|RPL39|RPS5|RPS15|RPS15A|RPS27A|RPS29|RPL23|EMG1|NOP56|RPP30|TBL3|EBNA1BP2|XRN2|WDR43|PES1|RPL13A|GNL3|NOB1|TRMT112|NOP58|NOP10|WDR12|WDR18|FTSJ3|WDR36	-11
Reactome Gene Sets	6	R-HSA-8868773	EGC-L	rRNA processing in the nucleus and cytosol	-15	4.8	11	30286	195	1217	38	3.1	0.5	705|2091|4691|4736|4809|6122|6134|6135|6136|6139|6146|6188|6193|6210|6231|10436|10528|10556|10607|10969|11340|22803|23481|23517|23521|26354|28987|51010|51013|51504|51602|54512|55505|55759|56915|57418|117246|118460	BYSL|FBL|NCL|RPL10A|SNU13|RPL3|RPL10|RPL11|RPL12|RPL17|RPL22|RPS3|RPS5|RPS15A|RPS26|EMG1|NOP56|RPP30|TBL3|EBNA1BP2|EXOSC8|XRN2|PES1|MTREX|RPL13A|GNL3|NOB1|EXOSC3|EXOSC1|TRMT112|NOP58|EXOSC4|NOP10|WDR12|EXOSC5|WDR18|FTSJ3|EXOSC6	-14
Reactome Gene Sets	6	R-HSA-8868773	GC-NL	rRNA processing in the nucleus and cytosol	-13	4.8	10	30286	195	1076	33	3.1	0.53	705|2091|2197|4691|4736|4809|6146|6169|6170|6193|6209|6210|6233|6235|9349|10436|10528|10556|10607|10969|22803|23160|23481|23521|26354|28987|51504|51602|55505|55759|57418|117246|134430	BYSL|FBL|FAU|NCL|RPL10A|SNU13|RPL22|RPL38|RPL39|RPS5|RPS15|RPS15A|RPS27A|RPS29|RPL23|EMG1|NOP56|RPP30|TBL3|EBNA1BP2|XRN2|WDR43|PES1|RPL13A|GNL3|NOB1|TRMT112|NOP58|NOP10|WDR12|WDR18|FTSJ3|WDR36	-11
Reactome Gene Sets	6	R-HSA-69242	GASTRITIS	S Phase	-3.8	3.4	4.7	30286	162	724	13	1.8	0.49	2237|4173|4175|5111|5424|5694|5695|5696|5699|5721|5982|6117|9126	FEN1|MCM4|MCM6|PCNA|POLD1|PSMB6|PSMB7|PSMB8|PSMB10|PSME2|RFC2|RPA1|SMC3	-3.1
Reactome Gene Sets	6	R-HSA-69242	EGC-L	S Phase	-5.1	3.1	5.4	30286	162	1217	20	1.6	0.36	2237|4171|4173|4174|4175|5111|5424|5425|5696|5699|5704|5710|5721|5982|5984|6117|6119|8243|9126|54107	FEN1|MCM2|MCM4|MCM5|MCM6|PCNA|POLD1|POLD2|PSMB8|PSMB10|PSMC4|PSMD4|PSME2|RFC2|RFC4|RPA1|RPA3|SMC1A|SMC3|POLE3	-4.1
Reactome Gene Sets	6	R-HSA-69242	IM-LGD-L	S Phase	-3.4	2.8	4.2	30286	162	1012	15	1.5	0.38	4171|4173|4174|4175|5111|5424|5425|5687|5692|5696|5699|5710|5721|5982|6118	MCM2|MCM4|MCM5|MCM6|PCNA|POLD1|POLD2|PSMA6|PSMB4|PSMB8|PSMB10|PSMD4|PSME2|RFC2|RPA2	-2.8
Reactome Gene Sets	6	R-HSA-69242	GC-NL	S Phase	-3.2	2.6	3.9	30286	162	1076	15	1.4	0.36	2237|4171|4173|4174|4175|5111|5424|5695|5704|5981|5982|5984|6233|8243|54107	FEN1|MCM2|MCM4|MCM5|MCM6|PCNA|POLD1|PSMB7|PSMC4|RFC1|RFC2|RFC4|RPS27A|SMC1A|POLE3	-2.2
Reactome Gene Sets	6	R-HSA-9679506	EGC-L	SARS-CoV Infections	-11	3	8.4	30286	414	1217	50	4.1	0.57	1173|1514|1603|1650|1655|2288|3106|3320|3326|3615|3837|3838|4927|5777|5903|5931|6184|6185|6188|6193|6210|6231|6628|6633|6634|6636|6637|6732|7175|7329|7534|8086|8480|9111|9219|9908|10146|10728|10762|23186|27072|29108|30011|53371|54815|55823|57459|84061|128866|203068	AP2M1|CTSL|DAD1|DDOST|DDX5|FKBP4|HLA-B|HSP90AA1|HSP90AB1|IMPDH2|KPNB1|KPNA2|NUP88|PTPN6|RANBP2|RBBP7|RPN1|RPN2|RPS3|RPS5|RPS15A|RPS26|SNRPB|SNRPD2|SNRPD3|SNRPF|SNRPG|SRPK1|TPR|UBE2I|YWHAZ|AAAS|RAE1|NMI|MTA2|G3BP2|G3BP1|PTGES3|NUP50|RCOR1|VPS41|PYCARD|SH3KBP1|NUP54|GATAD2A|VPS11|GATAD2B|MAGT1|CHMP4B|TUBB	-9.8
Reactome Gene Sets	6	R-HSA-9679506	GASTRITIS	SARS-CoV Infections	-6	2.8	5.9	30286	414	724	28	3.9	0.72	1312|1514|3106|3320|3326|3615|3837|4245|5336|5479|5777|6209|6634|6636|7175|7329|7415|7529|8480|8517|9219|10484|10728|25978|29108|30011|54815|203068	COMT|CTSL|HLA-B|HSP90AA1|HSP90AB1|IMPDH2|KPNB1|MGAT1|PLCG2|PPIB|PTPN6|RPS15|SNRPD3|SNRPF|TPR|UBE2I|VCP|YWHAB|RAE1|IKBKG|MTA2|SEC23A|PTGES3|CHMP2B|PYCARD|SH3KBP1|GATAD2A|TUBB	-5
Reactome Gene Sets	6	R-HSA-9679506	GC-NL	SARS-CoV Infections	-6.9	2.6	6.2	30286	414	1076	38	3.5	0.56	1173|1312|1514|2197|3106|3326|3614|3615|3716|4245|5289|5336|5777|5931|6193|6209|6210|6233|6235|6632|6634|6732|7175|7284|7329|8086|8480|8517|9219|9908|10146|10484|25921|29108|30011|53371|54815|203068	AP2M1|COMT|CTSL|FAU|HLA-B|HSP90AB1|IMPDH1|IMPDH2|JAK1|MGAT1|PIK3C3|PLCG2|PTPN6|RBBP7|RPS5|RPS15|RPS15A|RPS27A|RPS29|SNRPD1|SNRPD3|SRPK1|TPR|TUFM|UBE2I|AAAS|RAE1|IKBKG|MTA2|G3BP2|G3BP1|SEC23A|ZDHHC5|PYCARD|SH3KBP1|NUP54|GATAD2A|TUBB	-5.3
Reactome Gene Sets	6	R-HSA-9679506	IM-LGD-NL	SARS-CoV Infections	-2.6	2.6	3.5	30286	414	333	12	3.6	1	2197|3133|3326|3615|5336|5777|6209|8086|10484|10728|23186|29108	FAU|HLA-E|HSP90AB1|IMPDH2|PLCG2|PTPN6|RPS15|AAAS|SEC23A|PTGES3|RCOR1|PYCARD	-1.8
Reactome Gene Sets	6	R-HSA-9679506	IM-LGD-L	SARS-CoV Infections	-4.9	2.3	5	30286	414	1012	32	3.2	0.55	143|834|1312|2197|3106|3320|3615|3838|4790|4927|5479|5777|6231|6628|6636|7284|7329|8480|9868|9871|9908|10146|10484|10728|10762|10802|25921|29082|29108|30011|84061|128866	PARP4|CASP1|COMT|FAU|HLA-B|HSP90AA1|IMPDH2|KPNA2|NFKB1|NUP88|PPIB|PTPN6|RPS26|SNRPB|SNRPF|TUFM|UBE2I|RAE1|TOMM70|SEC24D|G3BP2|G3BP1|SEC23A|PTGES3|NUP50|SEC24A|ZDHHC5|CHMP4A|PYCARD|SH3KBP1|MAGT1|CHMP4B	-4
Reactome Gene Sets	6	R-HSA-9692916	IM-LGD-L	SARS-CoV-1 activates/modulates innate immune responses	-2.7	4.5	4.1	30286	40	1012	6	0.59	0.24	834|3838|4790|5479|9868|29108	CASP1|KPNA2|NFKB1|PPIB|TOMM70|PYCARD	-2.2
Reactome Gene Sets	6	R-HSA-9678108	GASTRITIS	SARS-CoV-1 Infection	-2.6	2.9	3.6	30286	142	724	10	1.4	0.43	1514|3837|4245|5479|6209|7329|7415|7529|25978|29108	CTSL|KPNB1|MGAT1|PPIB|RPS15|UBE2I|VCP|YWHAB|CHMP2B|PYCARD	-2.2
Reactome Gene Sets	6	R-HSA-9678108	IM-LGD-L	SARS-CoV-1 Infection	-2.5	2.5	3.4	30286	142	1012	12	1.2	0.34	143|834|2197|3838|4790|5479|6231|7329|9868|29082|29108|128866	PARP4|CASP1|FAU|KPNA2|NFKB1|PPIB|RPS26|UBE2I|TOMM70|CHMP4A|PYCARD|CHMP4B	-2.1
Reactome Gene Sets	6	R-HSA-9678108	EGC-L	SARS-CoV-1 Infection	-2.3	2.3	3.1	30286	142	1217	13	1.1	0.29	1514|1655|3837|3838|6188|6193|6210|6231|7329|7534|9111|29108|128866	CTSL|DDX5|KPNB1|KPNA2|RPS3|RPS5|RPS15A|RPS26|UBE2I|YWHAZ|NMI|PYCARD|CHMP4B	-1.9
Reactome Gene Sets	6	R-HSA-9735869	GC-L	SARS-CoV-1 modulates host translation machinery	-2.1	7.3	4.1	30286	37	336	3	0.89	0.51	2197|6193|6209	FAU|RPS5|RPS15	-1.8
Reactome Gene Sets	6	R-HSA-9735869	GC-NL	SARS-CoV-1 modulates host translation machinery	-2.7	4.6	4.2	30286	37	1076	6	0.56	0.23	2197|6193|6209|6210|6233|6235	FAU|RPS5|RPS15|RPS15A|RPS27A|RPS29	-1.9
Reactome Gene Sets	6	R-HSA-9692914	IM-LGD-L	SARS-CoV-1-host interactions	-2.3	2.8	3.3	30286	96	1012	9	0.89	0.3	834|2197|3838|4790|5479|6231|7329|9868|29108	CASP1|FAU|KPNA2|NFKB1|PPIB|RPS26|UBE2I|TOMM70|PYCARD	-1.9
Reactome Gene Sets	6	R-HSA-9692914	EGC-L	SARS-CoV-1-host interactions	-2.3	2.6	3.2	30286	96	1217	10	0.82	0.26	3837|3838|6188|6193|6210|6231|7329|7534|9111|29108	KPNB1|KPNA2|RPS3|RPS5|RPS15A|RPS26|UBE2I|YWHAZ|NMI|PYCARD	-1.9
Reactome Gene Sets	6	R-HSA-9705671	GC-NL	SARS-CoV-2 activates/modulates innate and adaptive immune responses	-3.8	3.1	4.6	30286	126	1076	14	1.3	0.35	3106|3326|3716|5289|5777|6233|7175|8086|8480|8517|9908|10146|10484|53371	HLA-B|HSP90AB1|JAK1|PIK3C3|PTPN6|RPS27A|TPR|AAAS|RAE1|IKBKG|G3BP2|G3BP1|SEC23A|NUP54	-2.7
Reactome Gene Sets	6	R-HSA-9705671	IM-LGD-L	SARS-CoV-2 activates/modulates innate and adaptive immune responses	-3.5	3.1	4.4	30286	126	1012	13	1.3	0.35	3106|3320|3838|4927|5777|8480|9868|9871|9908|10146|10484|10762|10802	HLA-B|HSP90AA1|KPNA2|NUP88|PTPN6|RAE1|TOMM70|SEC24D|G3BP2|G3BP1|SEC23A|NUP50|SEC24A	-2.9
Reactome Gene Sets	6	R-HSA-9705671	EGC-L	SARS-CoV-2 activates/modulates innate and adaptive immune responses	-3.3	2.8	4.1	30286	126	1217	14	1.2	0.31	3106|3320|3326|3838|4927|5777|5903|7175|8086|8480|9908|10146|10762|53371	HLA-B|HSP90AA1|HSP90AB1|KPNA2|NUP88|PTPN6|RANBP2|TPR|AAAS|RAE1|G3BP2|G3BP1|NUP50|NUP54	-2.7
Reactome Gene Sets	6	R-HSA-9694516	EGC-L	SARS-CoV-2 Infection	-8.3	3	7.1	30286	299	1217	36	3	0.49	1514|1603|1650|1655|3106|3320|3326|3838|4927|5777|5903|6184|6185|6188|6193|6210|6231|6628|6633|6634|6636|6637|6732|7175|7329|7534|8086|8480|9908|10146|10762|27072|53371|55823|84061|128866	CTSL|DAD1|DDOST|DDX5|HLA-B|HSP90AA1|HSP90AB1|KPNA2|NUP88|PTPN6|RANBP2|RPN1|RPN2|RPS3|RPS5|RPS15A|RPS26|SNRPB|SNRPD2|SNRPD3|SNRPF|SNRPG|SRPK1|TPR|UBE2I|YWHAZ|AAAS|RAE1|G3BP2|G3BP1|NUP50|VPS41|NUP54|VPS11|MAGT1|CHMP4B	-7
Reactome Gene Sets	6	R-HSA-9694516	GC-NL	SARS-CoV-2 Infection	-5	2.5	5.1	30286	299	1076	27	2.5	0.48	1514|2197|3106|3326|3716|4245|5289|5777|6193|6209|6210|6233|6235|6632|6634|6732|7175|7284|7329|8086|8480|8517|9908|10146|10484|25921|53371	CTSL|FAU|HLA-B|HSP90AB1|JAK1|MGAT1|PIK3C3|PTPN6|RPS5|RPS15|RPS15A|RPS27A|RPS29|SNRPD1|SNRPD3|SRPK1|TPR|TUFM|UBE2I|AAAS|RAE1|IKBKG|G3BP2|G3BP1|SEC23A|ZDHHC5|NUP54	-3.6
Reactome Gene Sets	6	R-HSA-9694516	GASTRITIS	SARS-CoV-2 Infection	-3	2.4	3.7	30286	299	724	17	2.3	0.56	1514|3106|3320|3326|4245|5777|6209|6634|6636|7175|7329|7415|7529|8480|8517|10484|25978	CTSL|HLA-B|HSP90AA1|HSP90AB1|MGAT1|PTPN6|RPS15|SNRPD3|SNRPF|TPR|UBE2I|VCP|YWHAB|RAE1|IKBKG|SEC23A|CHMP2B	-2.5
Reactome Gene Sets	6	R-HSA-9694516	IM-LGD-L	SARS-CoV-2 Infection	-4.1	2.4	4.5	30286	299	1012	24	2.4	0.48	143|2197|3106|3320|3838|4927|5777|6231|6628|6636|7284|7329|8480|9868|9871|9908|10146|10484|10762|10802|25921|29082|84061|128866	PARP4|FAU|HLA-B|HSP90AA1|KPNA2|NUP88|PTPN6|RPS26|SNRPB|SNRPF|TUFM|UBE2I|RAE1|TOMM70|SEC24D|G3BP2|G3BP1|SEC23A|NUP50|SEC24A|ZDHHC5|CHMP4A|MAGT1|CHMP4B	-3.4
Reactome Gene Sets	6	R-HSA-9754678	GC-NL	SARS-CoV-2 modulates host translation machinery	-3.4	4.4	4.7	30286	51	1076	8	0.74	0.26	2197|6193|6209|6210|6233|6235|6632|6634	FAU|RPS5|RPS15|RPS15A|RPS27A|RPS29|SNRPD1|SNRPD3	-2.4
Reactome Gene Sets	6	R-HSA-9754678	EGC-L	SARS-CoV-2 modulates host translation machinery	-3.8	4.4	5	30286	51	1217	9	0.74	0.25	6188|6193|6210|6231|6628|6633|6634|6636|6637	RPS3|RPS5|RPS15A|RPS26|SNRPB|SNRPD2|SNRPD3|SNRPF|SNRPG	-3.1
Reactome Gene Sets	6	R-HSA-9705683	EGC-L	SARS-CoV-2-host interactions	-6.7	3.2	6.4	30286	203	1217	26	2.1	0.41	3106|3320|3326|3838|4927|5777|5903|6188|6193|6210|6231|6628|6633|6634|6636|6637|7175|7534|8086|8480|9908|10146|10762|27072|53371|55823	HLA-B|HSP90AA1|HSP90AB1|KPNA2|NUP88|PTPN6|RANBP2|RPS3|RPS5|RPS15A|RPS26|SNRPB|SNRPD2|SNRPD3|SNRPF|SNRPG|TPR|YWHAZ|AAAS|RAE1|G3BP2|G3BP1|NUP50|VPS41|NUP54|VPS11	-5.6
Reactome Gene Sets	6	R-HSA-9705683	GC-NL	SARS-CoV-2-host interactions	-5.4	3.1	5.6	30286	203	1076	22	2	0.43	2197|3106|3326|3716|5289|5777|6193|6209|6210|6233|6235|6632|6634|7175|7284|8086|8480|8517|9908|10146|10484|53371	FAU|HLA-B|HSP90AB1|JAK1|PIK3C3|PTPN6|RPS5|RPS15|RPS15A|RPS27A|RPS29|SNRPD1|SNRPD3|TPR|TUFM|AAAS|RAE1|IKBKG|G3BP2|G3BP1|SEC23A|NUP54	-4
Reactome Gene Sets	6	R-HSA-9705683	IM-LGD-L	SARS-CoV-2-host interactions	-3.8	2.7	4.4	30286	203	1012	18	1.8	0.42	2197|3106|3320|3838|4927|5777|6231|6628|6636|7284|8480|9868|9871|9908|10146|10484|10762|10802	FAU|HLA-B|HSP90AA1|KPNA2|NUP88|PTPN6|RPS26|SNRPB|SNRPF|TUFM|RAE1|TOMM70|SEC24D|G3BP2|G3BP1|SEC23A|NUP50|SEC24A	-3.1
Reactome Gene Sets	6	R-HSA-9705683	GASTRITIS	SARS-CoV-2-host interactions	-2.4	2.5	3.3	30286	203	724	12	1.7	0.47	3106|3320|3326|5777|6209|6634|6636|7175|7529|8480|8517|10484	HLA-B|HSP90AA1|HSP90AB1|PTPN6|RPS15|SNRPD3|SNRPF|TPR|YWHAB|RAE1|IKBKG|SEC23A	-2
Reactome Gene Sets	6	R-HSA-9705683	IM-LGD-NL	SARS-CoV-2-host interactions	-2.1	3.1	3.2	30286	203	333	7	2.1	0.79	2197|3133|3326|5777|6209|8086|10484	FAU|HLA-E|HSP90AB1|PTPN6|RPS15|AAAS|SEC23A	-1.4
Reactome Gene Sets	6	R-HSA-3000480	IM-LGD-L	Scavenging by Class A Receptors	-3.5	7.9	5.6	30286	19	1012	5	0.49	0.22	335|338|348|811|7184	APOA1|APOB|APOE|CALR|HSP90B1	-2.9
Reactome Gene Sets	6	R-HSA-3000480	EGC-L	Scavenging by Class A Receptors	-2.2	5.2	3.8	30286	19	1217	4	0.33	0.16	335|338|348|1277	APOA1|APOB|APOE|COL1A1	-1.8
Reactome Gene Sets	6	R-HSA-3000484	IM-LGD-L	Scavenging by Class F Receptors	-3.2	15	6.4	30286	6	1012	3	0.3	0.17	338|811|3320	APOB|CALR|HSP90AA1	-2.6
Reactome Gene Sets	6	R-HSA-3000484	EGC-L	Scavenging by Class F Receptors	-2.9	12	5.7	30286	6	1217	3	0.25	0.14	338|3320|10525	APOB|HSP90AA1|HYOU1	-2.4
Reactome Gene Sets	6	R-HSA-2168880	IM-LGD-L	Scavenging of heme from plasma	-4.4	12	7	30286	13	1012	5	0.49	0.22	259|335|3263|3512|8542	AMBP|APOA1|HPX|JCHAIN|APOL1	-3.6
Reactome Gene Sets	6	R-HSA-174113	IM-LGD-L	SCF-beta-TrCP mediated degradation of Emi1	-2	3.3	3.1	30286	55	1012	6	0.59	0.24	5687|5692|5696|5699|5710|5721	PSMA6|PSMB4|PSMB8|PSMB10|PSMD4|PSME2	-1.7
Reactome Gene Sets	6	R-HSA-9668328	EGC-L	Sealing of the nuclear envelope (NE) by ESCRT-III	-2.1	4	3.4	30286	31	1217	5	0.41	0.18	10382|81027|84617|128866|221496	TUBB4A|TUBB1|TUBB6|CHMP4B|LEMD2	-1.8
Reactome Gene Sets	6	R-HSA-9663891	EGC-L	Selective autophagy	-2.8	3.1	3.8	30286	81	1217	10	0.82	0.26	1783|3312|3320|7416|7431|8878|9927|10382|81027|84617	DYNC1LI2|HSPA8|HSP90AA1|VDAC1|VIM|SQSTM1|MFN2|TUBB4A|TUBB1|TUBB6	-2.3
Reactome Gene Sets	6	R-HSA-9663891	IM-LGD-L	Selective autophagy	-2.2	3	3.3	30286	81	1012	8	0.79	0.28	472|3312|3320|7416|8878|9868|9927|56993	ATM|HSPA8|HSP90AA1|VDAC1|SQSTM1|TOMM70|MFN2|TOMM22	-1.9
Reactome Gene Sets	6	R-HSA-2408522	GC-NL	Selenoamino acid metabolism	-4.7	3.5	5.3	30286	119	1076	15	1.4	0.36	2197|3376|4736|6146|6169|6170|6193|6209|6210|6233|6235|9060|9061|9349|23521	FAU|IARS1|RPL10A|RPL22|RPL38|RPL39|RPS5|RPS15|RPS15A|RPS27A|RPS29|PAPSS2|PAPSS1|RPL23|RPL13A	-3.3
Reactome Gene Sets	6	R-HSA-2408522	EGC-L	Selenoamino acid metabolism	-4.6	3.3	5.2	30286	119	1217	16	1.3	0.33	191|3376|4141|4736|6122|6134|6135|6136|6139|6146|6188|6193|6210|6231|9060|23521	AHCY|IARS1|MARS1|RPL10A|RPL3|RPL10|RPL11|RPL12|RPL17|RPL22|RPS3|RPS5|RPS15A|RPS26|PAPSS2|RPL13A	-3.8
Reactome Gene Sets	6	R-HSA-2408557	GC-NL	Selenocysteine synthesis	-3.9	3.6	4.8	30286	94	1076	12	1.1	0.32	2197|4736|6146|6169|6170|6193|6209|6210|6233|6235|9349|23521	FAU|RPL10A|RPL22|RPL38|RPL39|RPS5|RPS15|RPS15A|RPS27A|RPS29|RPL23|RPL13A	-2.8
Reactome Gene Sets	6	R-HSA-2408557	EGC-L	Selenocysteine synthesis	-3.4	3.2	4.3	30286	94	1217	12	0.99	0.28	4736|6122|6134|6135|6136|6139|6146|6188|6193|6210|6231|23521	RPL10A|RPL3|RPL10|RPL11|RPL12|RPL17|RPL22|RPS3|RPS5|RPS15A|RPS26|RPL13A	-2.8
Reactome Gene Sets	6	R-HSA-400685	EGC-L	Sema4D in semaphorin signaling	-2.5	5	4.1	30286	25	1217	5	0.41	0.18	388|4627|4637|9826|103910	RHOB|MYH9|MYL6|ARHGEF11|MYL12B	-2.1
Reactome Gene Sets	6	R-HSA-416572	EGC-L	Sema4D induced cell migration and growth-cone collapse	-2.9	5.9	4.6	30286	21	1217	5	0.41	0.18	388|4627|4637|9826|103910	RHOB|MYH9|MYL6|ARHGEF11|MYL12B	-2.4
Reactome Gene Sets	6	R-HSA-373755	EGC-L	Semaphorin interactions	-4.3	4.2	5.3	30286	65	1217	11	0.9	0.27	388|1809|3320|3326|4627|4637|5062|5788|7094|9826|103910	RHOB|DPYSL3|HSP90AA1|HSP90AB1|MYH9|MYL6|PAK2|PTPRC|TLN1|ARHGEF11|MYL12B	-3.5
Reactome Gene Sets	6	R-HSA-373755	GC-NL	Semaphorin interactions	-2.7	3.5	3.8	30286	65	1076	8	0.74	0.26	1809|3326|4627|4637|5062|5788|7094|103910	DPYSL3|HSP90AB1|MYH9|MYL6|PAK2|PTPRC|TLN1|MYL12B	-1.8
Reactome Gene Sets	6	R-HSA-373755	IM-LGD-NL	Semaphorin interactions	-2.2	5.6	3.9	30286	65	333	4	1.2	0.6	1809|3326|5788|7094	DPYSL3|HSP90AB1|PTPRC|TLN1	-1.5
Reactome Gene Sets	6	R-HSA-5693548	IM-LGD-L	Sensing of DNA Double Strand Breaks	-4.8	20	8.6	30286	6	1012	4	0.4	0.2	472|3838|4683|10111	ATM|KPNA2|NBN|RAD50	-3.9
Reactome Gene Sets	6	R-HSA-5693548	GASTRITIS	Sensing of DNA Double Strand Breaks	-3.6	21	7.6	30286	6	724	3	0.41	0.24	472|4683|10111	ATM|NBN|RAD50	-2.9
Reactome Gene Sets	6	R-HSA-5693548	EGC-L	Sensing of DNA Double Strand Breaks	-2.9	12	5.7	30286	6	1217	3	0.25	0.14	3838|4683|10111	KPNA2|NBN|RAD50	-2.4
Reactome Gene Sets	6	R-HSA-9659379	GC-NL	Sensory processing of sound	-2.3	3	3.3	30286	76	1076	8	0.74	0.26	1488|4478|4627|6844|7430|8573|10083|11344	CTBP2|MSN|MYH9|VAMP2|EZR|CASK|USH1C|TWF2	-1.5
Reactome Gene Sets	6	R-HSA-9662360	GC-NL	Sensory processing of sound by inner hair cells of the cochlea	-2.5	3.3	3.6	30286	69	1076	8	0.74	0.26	1488|4478|4627|6844|7430|8573|10083|11344	CTBP2|MSN|MYH9|VAMP2|EZR|CASK|USH1C|TWF2	-1.7
Reactome Gene Sets	6	R-HSA-2467813	EGC-L	Separation of Sister Chromatids	-2.7	2.2	3.5	30286	190	1217	17	1.4	0.34	1783|5048|5696|5699|5704|5710|5721|5903|5905|8243|9126|10382|10726|22919|55920|81027|84617	DYNC1LI2|PAFAH1B1|PSMB8|PSMB10|PSMC4|PSMD4|PSME2|RANBP2|RANGAP1|SMC1A|SMC3|TUBB4A|NUDC|MAPRE1|RCC2|TUBB1|TUBB6	-2.3
Reactome Gene Sets	6	R-HSA-392518	IM-LGD-NL	Signal amplification	-2.2	8.3	4.4	30286	33	333	3	0.9	0.52	2767|2776|55970	GNA11|GNAQ|GNG12	-1.5
Reactome Gene Sets	6	R-HSA-392518	EGC-L	Signal amplification	-2	3.8	3.3	30286	33	1217	5	0.41	0.18	2767|2776|2788|54331|55970	GNA11|GNAQ|GNG7|GNG2|GNG12	-1.7
Reactome Gene Sets	6	R-HSA-9725370	GASTRITIS	Signaling by ALK fusions and activated point mutants	-2.2	3.2	3.3	30286	91	724	7	0.97	0.36	3662|4478|5777|7171|7175|51530|57674	IRF4|MSN|PTPN6|TPM4|TPR|ZC3HC1|RNF213	-1.8
Reactome Gene Sets	6	R-HSA-9725370	GC-NL	Signaling by ALK fusions and activated point mutants	-2.3	2.8	3.3	30286	91	1076	9	0.84	0.28	1213|3662|4478|4627|5777|6233|7170|7171|7175	CLTC|IRF4|MSN|MYH9|PTPN6|RPS27A|TPM3|TPM4|TPR	-1.5
Reactome Gene Sets	6	R-HSA-9700206	GASTRITIS	Signaling by ALK in cancer	-2.2	3.2	3.3	30286	91	724	7	0.97	0.36	3662|4478|5777|7171|7175|51530|57674	IRF4|MSN|PTPN6|TPM4|TPR|ZC3HC1|RNF213	-1.8
Reactome Gene Sets	6	R-HSA-9700206	GC-NL	Signaling by ALK in cancer	-2.3	2.8	3.3	30286	91	1076	9	0.84	0.28	1213|3662|4478|4627|5777|6233|7170|7171|7175	CLTC|IRF4|MSN|MYH9|PTPN6|RPS27A|TPM3|TPM4|TPR	-1.5
Reactome Gene Sets	6	R-HSA-6802952	GC-NL	Signaling by BRAF and RAF1 fusions	-3.2	3.8	4.4	30286	67	1076	9	0.84	0.28	1445|2243|2244|5037|7094|7450|8546|8826|9061	CSK|FGA|FGB|PEBP1|TLN1|VWF|AP3B1|IQGAP1|PAPSS1	-2.2
Reactome Gene Sets	6	R-HSA-6802952	IM-LGD-L	Signaling by BRAF and RAF1 fusions	-2.2	3.1	3.2	30286	67	1012	7	0.69	0.26	1445|2243|2244|3674|4893|7450|9061	CSK|FGA|FGB|ITGA2B|NRAS|VWF|PAPSS1	-1.8
Reactome Gene Sets	6	R-HSA-9680350	GC-NL	Signaling by CSF1 (M-CSF) in myeloid cells	-2.4	4.5	3.8	30286	31	1076	5	0.46	0.21	867|4067|5336|6233|7525	CBL|LYN|PLCG2|RPS27A|YES1	-1.6
Reactome Gene Sets	6	R-HSA-177929	GASTRITIS	Signaling by EGFR	-2.8	4.7	4.3	30286	53	724	6	0.83	0.34	867|1445|1956|6456|8027|30011	CBL|CSK|EGFR|SH3GL2|STAM|SH3KBP1	-2.3
Reactome Gene Sets	6	R-HSA-5637812	GASTRITIS	Signaling by EGFRvIII in Cancer	-2.3	8.4	4.5	30286	15	724	3	0.41	0.24	867|1956|3320	CBL|EGFR|HSP90AA1	-1.9
Reactome Gene Sets	6	R-HSA-5654738	EGC-L	Signaling by FGFR2	-2.1	2.7	3	30286	73	1217	8	0.66	0.23	867|2962|2963|3185|3187|4670|5434|5725	CBL|GTF2F1|GTF2F2|HNRNPF|HNRNPH1|HNRNPM|POLR2E|PTBP1	-1.7
Reactome Gene Sets	6	R-HSA-6802948	GC-NL	Signaling by high-kinase activity BRAF mutants	-3.6	5.5	5.2	30286	36	1076	7	0.65	0.25	1445|2243|2244|5037|7094|7450|8826	CSK|FGA|FGB|PEBP1|TLN1|VWF|IQGAP1	-2.5
Reactome Gene Sets	6	R-HSA-6802948	IM-LGD-L	Signaling by high-kinase activity BRAF mutants	-2.9	5	4.5	30286	36	1012	6	0.59	0.24	1445|2243|2244|3674|4893|7450	CSK|FGA|FGB|ITGA2B|NRAS|VWF	-2.4
Reactome Gene Sets	6	R-HSA-6802948	EGC-L	Signaling by high-kinase activity BRAF mutants	-2.5	4.1	3.9	30286	36	1217	6	0.49	0.2	1445|2243|2244|3674|7094|8826	CSK|FGA|FGB|ITGA2B|TLN1|IQGAP1	-2.1
Reactome Gene Sets	6	R-HSA-6802948	IM-LGD-NL	Signaling by high-kinase activity BRAF mutants	-2.1	7.6	4.2	30286	36	333	3	0.9	0.52	1445|7094|7450	CSK|TLN1|VWF	-1.4
Reactome Gene Sets	6	R-HSA-449147	IM-LGD-L	Signaling by Interleukins	-4.9	2.2	4.9	30286	473	1012	35	3.5	0.57	301|834|1072|3162|3185|3312|3313|3320|3606|3662|3684|3689|3936|4001|4067|4128|4790|5306|5657|5687|5692|5696|5699|5710|5721|5777|6195|6197|6844|7076|7184|8878|9049|79671|552900	ANXA1|CASP1|CFL1|HMOX1|HNRNPF|HSPA8|HSPA9|HSP90AA1|IL18|IRF4|ITGAM|ITGB2|LCP1|LMNB1|LYN|MAOA|NFKB1|PITPNA|PRTN3|PSMA6|PSMB4|PSMB8|PSMB10|PSMD4|PSME2|PTPN6|RPS6KA1|RPS6KA3|VAMP2|TIMP1|HSP90B1|SQSTM1|AIP|NLRX1|BOLA2	-4
Reactome Gene Sets	6	R-HSA-449147	GC-NL	Signaling by Interleukins	-4.8	2.1	4.8	30286	473	1076	36	3.3	0.55	301|867|1265|3162|3181|3383|3606|3662|3684|3689|3716|3936|4001|4067|4128|4313|4318|4478|5062|5657|5695|5704|5777|6233|6627|6778|6844|7431|7525|8517|9049|27250|54472|79671|121457|200081	ANXA1|CBL|CNN2|HMOX1|HNRNPA2B1|ICAM1|IL18|IRF4|ITGAM|ITGB2|JAK1|LCP1|LMNB1|LYN|MAOA|MMP2|MMP9|MSN|PAK2|PRTN3|PSMB7|PSMC4|PTPN6|RPS27A|SNRPA1|STAT6|VAMP2|VIM|YES1|IKBKG|AIP|PDCD4|TOLLIP|NLRX1|IKBIP|TXLNA	-3.4
Reactome Gene Sets	6	R-HSA-449147	EGC-L	Signaling by Interleukins	-4.7	2.1	4.7	30286	473	1217	39	3.2	0.5	301|829|867|2162|3146|3185|3312|3320|3383|3606|3684|3689|3936|4001|4067|4128|4282|4318|4478|5062|5657|5696|5699|5704|5710|5721|5777|6627|6844|6888|7431|7534|8878|9049|27250|79671|121457|200081|552900	ANXA1|CAPZA1|CBL|F13A1|HMGB1|HNRNPF|HSPA8|HSP90AA1|ICAM1|IL18|ITGAM|ITGB2|LCP1|LMNB1|LYN|MAOA|MIF|MMP9|MSN|PAK2|PRTN3|PSMB8|PSMB10|PSMC4|PSMD4|PSME2|PTPN6|SNRPA1|VAMP2|TALDO1|VIM|YWHAZ|SQSTM1|AIP|PDCD4|NLRX1|IKBIP|TXLNA|BOLA2	-3.8
Reactome Gene Sets	6	R-HSA-449147	GC-L	Signaling by Interleukins	-3.5	2.9	4.3	30286	473	336	15	4.5	1.1	3689|4128|4318|5657|5696|5699|5721|5777|8517|8878|9049|9261|79671|121457|200081	ITGB2|MAOA|MMP9|PRTN3|PSMB8|PSMB10|PSME2|PTPN6|IKBKG|SQSTM1|AIP|MAPKAPK2|NLRX1|IKBIP|TXLNA	-2.9
Reactome Gene Sets	6	R-HSA-449147	GASTRITIS	Signaling by Interleukins	-6.3	2.7	6	30286	473	724	31	4.3	0.75	301|829|867|2162|2185|3146|3162|3181|3320|3383|3662|3689|3936|4001|4067|4128|4478|5657|5694|5695|5696|5699|5721|5777|6283|7184|7431|8517|9049|9261|79792	ANXA1|CAPZA1|CBL|F13A1|PTK2B|HMGB1|HMOX1|HNRNPA2B1|HSP90AA1|ICAM1|IRF4|ITGB2|LCP1|LMNB1|LYN|MAOA|MSN|PRTN3|PSMB6|PSMB7|PSMB8|PSMB10|PSME2|PTPN6|S100A12|HSP90B1|VIM|IKBKG|AIP|MAPKAPK2|GSDMD	-5.2
Reactome Gene Sets	6	R-HSA-449147	IM-LGD-NL	Signaling by Interleukins	-4.1	3.1	4.8	30286	473	333	16	4.8	1.2	301|867|3662|3684|3689|3911|3936|3965|4128|5657|5777|6810|54472|79671|200081|552900	ANXA1|CBL|IRF4|ITGAM|ITGB2|LAMA5|LCP1|LGALS9|MAOA|PRTN3|PTPN6|STX4|TOLLIP|NLRX1|TXLNA|BOLA2	-2.9
Reactome Gene Sets	6	R-HSA-5637815	GASTRITIS	Signaling by Ligand-Responsive EGFR Variants in Cancer	-2	6.6	3.8	30286	19	724	3	0.41	0.24	867|1956|3320	CBL|EGFR|HSP90AA1	-1.7
Reactome Gene Sets	6	R-HSA-6806834	GC-NL	Signaling by MET	-3.3	3.6	4.4	30286	79	1076	10	0.93	0.29	867|3673|3908|3914|5770|5867|6233|6455|8027|30011	CBL|ITGA2|LAMA2|LAMB3|PTPN1|RAB4A|RPS27A|SH3GL1|STAM|SH3KBP1	-2.3
Reactome Gene Sets	6	R-HSA-6806834	EGC-L	Signaling by MET	-2.4	2.8	3.3	30286	79	1217	9	0.74	0.25	867|1277|2060|3908|3914|5770|6455|8027|30011	CBL|COL1A1|EPS15|LAMA2|LAMB3|PTPN1|SH3GL1|STAM|SH3KBP1	-2
Reactome Gene Sets	6	R-HSA-6802946	GC-NL	Signaling by moderate kinase activity BRAF mutants	-2.9	4.2	4.2	30286	47	1076	7	0.65	0.25	1445|2243|2244|5037|7094|7450|8826	CSK|FGA|FGB|PEBP1|TLN1|VWF|IQGAP1	-2
Reactome Gene Sets	6	R-HSA-6802946	IM-LGD-L	Signaling by moderate kinase activity BRAF mutants	-2.3	3.8	3.6	30286	47	1012	6	0.59	0.24	1445|2243|2244|3674|4893|7450	CSK|FGA|FGB|ITGA2B|NRAS|VWF	-1.9
Reactome Gene Sets	6	R-HSA-9006927	GASTRITIS	Signaling by Non-Receptor Tyrosine Kinases	-2	3.9	3.3	30286	54	724	5	0.69	0.31	867|1956|5770|6421|9844	CBL|EGFR|PTPN1|SFPQ|ELMO1	-1.7
Reactome Gene Sets	6	R-HSA-9006931	EGC-L	Signaling by Nuclear Receptors	-8.3	3	7.1	30286	298	1217	36	3	0.49	126|216|220|341|344|348|865|1374|1655|1737|2288|2788|2962|2963|3315|3320|3326|3838|4318|5162|5165|5434|5481|7031|8243|9126|10498|10728|51109|54331|55970|57665|79718|80820|112724|128312	ADH1C|ALDH1A1|ALDH1A3|APOC1|APOC2|APOE|CBFB|CPT1A|DDX5|DLAT|FKBP4|GNG7|GTF2F1|GTF2F2|HSPB1|HSP90AA1|HSP90AB1|KPNA2|MMP9|PDHB|PDK3|POLR2E|PPID|TFF1|SMC1A|SMC3|CARM1|PTGES3|RDH11|GNG2|GNG12|RDH14|TBL1XR1|EEPD1|RDH13|H2BC26	-7.1
Reactome Gene Sets	6	R-HSA-9006931	GC-NL	Signaling by Nuclear Receptors	-5	2.6	5.2	30286	298	1076	27	2.5	0.48	126|216|220|341|344|347|348|865|1737|2171|2289|2788|2962|2963|3326|4313|4318|5162|5434|5481|7031|8243|8644|10498|57665|80820|112724	ADH1C|ALDH1A1|ALDH1A3|APOC1|APOC2|APOD|APOE|CBFB|DLAT|FABP5|FKBP5|GNG7|GTF2F1|GTF2F2|HSP90AB1|MMP2|MMP9|PDHB|POLR2E|PPID|TFF1|SMC1A|AKR1C3|CARM1|RDH14|EEPD1|RDH13	-3.6
Reactome Gene Sets	6	R-HSA-9006931	IM-LGD-L	Signaling by Nuclear Receptors	-3.7	2.3	4.2	30286	298	1012	23	2.3	0.47	216|341|344|347|348|865|1737|2783|2958|2962|2963|3014|3320|3838|4893|5434|5481|10498|10728|51109|57665|80820|112724	ALDH1A1|APOC1|APOC2|APOD|APOE|CBFB|DLAT|GNB2|GTF2A2|GTF2F1|GTF2F2|H2AX|HSP90AA1|KPNA2|NRAS|POLR2E|PPID|CARM1|PTGES3|RDH11|RDH14|EEPD1|RDH13	-3
Reactome Gene Sets	6	R-HSA-9006931	GASTRITIS	Signaling by Nuclear Receptors	-2.2	2.1	3	30286	298	724	15	2.1	0.53	216|220|341|344|865|1737|1956|2171|2963|3320|3326|5162|9126|10728|112724	ALDH1A1|ALDH1A3|APOC1|APOC2|CBFB|DLAT|EGFR|FABP5|GTF2F2|HSP90AA1|HSP90AB1|PDHB|SMC3|PTGES3|RDH13	-1.9
Reactome Gene Sets	6	R-HSA-8848021	GASTRITIS	Signaling by PTK6	-2	3.9	3.3	30286	54	724	5	0.69	0.31	867|1956|5770|6421|9844	CBL|EGFR|PTPN1|SFPQ|ELMO1	-1.7
Reactome Gene Sets	6	R-HSA-9656223	IM-LGD-L	Signaling by RAF1 mutants	-2.5	4.2	3.9	30286	43	1012	6	0.59	0.24	1445|2243|2244|3674|4893|7450	CSK|FGA|FGB|ITGA2B|NRAS|VWF	-2.1
Reactome Gene Sets	6	R-HSA-9656223	GC-NL	Signaling by RAF1 mutants	-2.4	3.9	3.7	30286	43	1076	6	0.56	0.23	1445|2243|2244|7094|7450|8826	CSK|FGA|FGB|TLN1|VWF|IQGAP1	-1.6
Reactome Gene Sets	6	R-HSA-9656223	EGC-L	Signaling by RAF1 mutants	-2.1	3.5	3.3	30286	43	1217	6	0.49	0.2	1445|2243|2244|3674|7094|8826	CSK|FGA|FGB|ITGA2B|TLN1|IQGAP1	-1.8
Reactome Gene Sets	6	R-HSA-6802949	GC-NL	Signaling by RAS mutants	-2.9	4.2	4.2	30286	47	1076	7	0.65	0.25	1445|2243|2244|5037|7094|7450|8826	CSK|FGA|FGB|PEBP1|TLN1|VWF|IQGAP1	-2
Reactome Gene Sets	6	R-HSA-6802949	IM-LGD-L	Signaling by RAS mutants	-2.3	3.8	3.6	30286	47	1012	6	0.59	0.24	1445|2243|2244|3674|4893|7450	CSK|FGA|FGB|ITGA2B|NRAS|VWF	-1.9
Reactome Gene Sets	6	R-HSA-9006934	GC-NL	Signaling by Receptor Tyrosine Kinases	-5.4	2.2	5.2	30286	534	1076	41	3.8	0.58	348|867|1173|1213|1291|1292|1445|1536|2670|2962|2963|3416|3673|3685|3908|3914|4067|4192|4318|4670|5062|5289|5340|5434|5580|5725|5770|5777|5867|6233|6455|6678|6778|7057|7525|8027|9844|10787|11140|25920|30011	APOE|CBL|AP2M1|CLTC|COL6A1|COL6A2|CSK|CYBB|GFAP|GTF2F1|GTF2F2|IDE|ITGA2|ITGAV|LAMA2|LAMB3|LYN|MDK|MMP9|HNRNPM|PAK2|PIK3C3|PLG|POLR2E|PRKCD|PTBP1|PTPN1|PTPN6|RAB4A|RPS27A|SH3GL1|SPARC|STAT6|THBS1|YES1|STAM|ELMO1|NCKAP1|CDC37|NELFB|SH3KBP1	-4
Reactome Gene Sets	6	R-HSA-9006934	GASTRITIS	Signaling by Receptor Tyrosine Kinases	-2.3	1.8	2.9	30286	534	724	23	3.2	0.65	867|1291|1292|1445|1536|1956|2185|2670|2963|3320|4067|4670|5770|5777|5867|5899|6456|7529|8027|9261|9844|25920|30011	CBL|COL6A1|COL6A2|CSK|CYBB|EGFR|PTK2B|GFAP|GTF2F2|HSP90AA1|LYN|HNRNPM|PTPN1|PTPN6|RAB4A|RALB|SH3GL2|YWHAB|STAM|MAPKAPK2|ELMO1|NELFB|SH3KBP1	-1.9
Reactome Gene Sets	6	R-HSA-9006934	GC-L	Signaling by Receptor Tyrosine Kinases	-2.1	2.2	2.9	30286	534	336	13	3.9	1.1	348|2962|2963|3416|4192|4318|5770|5777|6455|6456|6678|9261|30011	APOE|GTF2F1|GTF2F2|IDE|MDK|MMP9|PTPN1|PTPN6|SH3GL1|SH3GL2|SPARC|MAPKAPK2|SH3KBP1	-1.8
Reactome Gene Sets	6	R-HSA-9006934	EGC-L	Signaling by Receptor Tyrosine Kinases	-3.6	1.8	3.9	30286	534	1217	39	3.2	0.5	348|867|1173|1277|1291|1292|1445|1536|2060|2475|2670|2962|2963|3185|3187|3315|3320|3908|3914|4067|4192|4318|4670|5062|5340|5434|5580|5725|5770|5777|5899|6455|6678|7057|8027|10787|11140|23191|30011	APOE|CBL|AP2M1|COL1A1|COL6A1|COL6A2|CSK|CYBB|EPS15|MTOR|GFAP|GTF2F1|GTF2F2|HNRNPF|HNRNPH1|HSPB1|HSP90AA1|LAMA2|LAMB3|LYN|MDK|MMP9|HNRNPM|PAK2|PLG|POLR2E|PRKCD|PTBP1|PTPN1|PTPN6|RALB|SH3GL1|SPARC|THBS1|STAM|NCKAP1|CDC37|CYFIP1|SH3KBP1	-2.9
Reactome Gene Sets	6	R-HSA-9006934	IM-LGD-L	Signaling by Receptor Tyrosine Kinases	-2.1	1.6	2.7	30286	534	1012	29	2.9	0.52	348|382|1445|2475|2670|2962|2963|3185|3187|3320|3673|3908|3914|4067|4192|4893|5340|5434|5603|5725|5777|5899|6195|6197|7057|8027|11140|30011|51382	APOE|ARF6|CSK|MTOR|GFAP|GTF2F1|GTF2F2|HNRNPF|HNRNPH1|HSP90AA1|ITGA2|LAMA2|LAMB3|LYN|MDK|NRAS|PLG|POLR2E|MAPK13|PTBP1|PTPN6|RALB|RPS6KA1|RPS6KA3|THBS1|STAM|CDC37|SH3KBP1|ATP6V1D	-1.8
Reactome Gene Sets	6	R-HSA-5362517	EGC-L	Signaling by Retinoic Acid	-5.2	5.8	6.4	30286	43	1217	10	0.82	0.26	126|216|220|1374|1737|5162|5165|51109|57665|112724	ADH1C|ALDH1A1|ALDH1A3|CPT1A|DLAT|PDHB|PDK3|RDH11|RDH14|RDH13	-4.3
Reactome Gene Sets	6	R-HSA-5362517	GC-NL	Signaling by Retinoic Acid	-4.8	5.9	6.2	30286	43	1076	9	0.84	0.28	126|216|220|1737|2171|5162|8644|57665|112724	ADH1C|ALDH1A1|ALDH1A3|DLAT|FABP5|PDHB|AKR1C3|RDH14|RDH13	-3.4
Reactome Gene Sets	6	R-HSA-5362517	GASTRITIS	Signaling by Retinoic Acid	-3.3	5.8	5	30286	43	724	6	0.83	0.34	216|220|1737|2171|5162|112724	ALDH1A1|ALDH1A3|DLAT|FABP5|PDHB|RDH13	-2.7
Reactome Gene Sets	6	R-HSA-194315	EGC-L	Signaling by Rho GTPases	-13	2.6	8.8	30286	706	1217	74	6.1	0.69	224|388|397|1152|1445|1536|1629|1783|2040|2631|3163|3320|3326|3336|3954|3998|4001|4162|4627|4637|4698|4722|5048|5062|5216|5217|5580|5880|5903|5905|6279|6280|6472|6793|7037|7112|7171|7431|7456|7534|8027|8086|8826|9138|9217|9826|10095|10134|10250|10382|10424|10552|10726|10787|10788|10970|11140|22919|23075|23191|23256|23592|25813|55240|55920|56254|56667|79869|81027|84617|84681|103910|121512|128312	ALDH3A2|RHOB|ARHGDIB|CKB|CSK|CYBB|DBT|DYNC1LI2|STOM|NIPSNAP2|HMOX2|HSP90AA1|HSP90AB1|HSPE1|LETM1|LMAN1|LMNB1|MCAM|MYH9|MYL6|NDUFA5|NDUFS3|PAFAH1B1|PAK2|PFN1|PFN2|PRKCD|RAC2|RANBP2|RANGAP1|S100A8|S100A9|SHMT2|STK10|TFRC|TMPO|TPM4|VIM|WIPF1|YWHAZ|STAM|AAAS|IQGAP1|ARHGEF1|VAPB|ARHGEF11|ARPC1B|BCAP31|SRRM1|TUBB4A|PGRMC2|ARPC1A|NUDC|NCKAP1|IQGAP2|CKAP4|CDC37|MAPRE1|SWAP70|CYFIP1|SCFD1|LEMD3|SAMM50|STE…	-12
Reactome Gene Sets	6	R-HSA-194315	GASTRITIS	Signaling by Rho GTPases	-9.9	2.8	7.8	30286	706	724	48	6.6	0.92	391|397|1152|1445|1536|1629|1794|2185|2631|3163|3320|3326|3954|4001|4162|4698|4722|5048|5217|5880|6279|6793|7037|7171|7415|7431|7456|7529|8027|8976|10095|10211|10250|23048|23075|23513|23526|23592|25813|50619|55240|55920|56254|56667|84617|84681|121512|157769	RHOG|ARHGDIB|CKB|CSK|CYBB|DBT|DOCK2|PTK2B|NIPSNAP2|HMOX2|HSP90AA1|HSP90AB1|LETM1|LMNB1|MCAM|NDUFA5|NDUFS3|PAFAH1B1|PFN2|RAC2|S100A8|STK10|TFRC|TPM4|VCP|VIM|WIPF1|YWHAB|STAM|WASL|ARPC1B|FLOT1|SRRM1|FNBP1|SWAP70|SCRIB|ARHGAP45|LEMD3|SAMM50|DEF6|STEAP3|RCC2|RNF20|MUC13|TUBB6|HINT2|FGD4|FAM91A1	-8.5
Reactome Gene Sets	6	R-HSA-194315	GC-NL	Signaling by Rho GTPases	-11	2.5	7.8	30286	706	1076	63	5.9	0.72	391|397|1152|1213|1445|1536|1629|1783|2040|2316|2631|3163|3326|3954|3998|4001|4162|4627|4637|4698|4722|5048|5062|5217|5289|5580|5880|6279|6280|6793|7037|7170|7171|7431|7454|7456|8027|8086|8776|8826|10095|10250|10552|10726|10787|10788|11135|11140|23075|23344|23526|23592|25813|50619|51138|55240|55920|56254|56667|84617|84681|103910|121512	RHOG|ARHGDIB|CKB|CLTC|CSK|CYBB|DBT|DYNC1LI2|STOM|FLNA|NIPSNAP2|HMOX2|HSP90AB1|LETM1|LMAN1|LMNB1|MCAM|MYH9|MYL6|NDUFA5|NDUFS3|PAFAH1B1|PAK2|PFN2|PIK3C3|PRKCD|RAC2|S100A8|S100A9|STK10|TFRC|TPM3|TPM4|VIM|WAS|WIPF1|STAM|AAAS|MTMR1|IQGAP1|ARPC1B|SRRM1|ARPC1A|NUDC|NCKAP1|IQGAP2|CDC42EP1|CDC37|SWAP70|ESYT1|ARHGAP45|LEMD3|SAMM50|DEF6|COPS4|STEAP3|RCC2|RNF20|MUC13|TUBB6|HINT2|MYL12B|FGD4	-8.7
Reactome Gene Sets	6	R-HSA-194315	IM-LGD-NL	Signaling by Rho GTPases	-5.4	3	5.6	30286	706	333	23	6.9	1.4	397|1445|1536|1629|3326|4162|4722|5048|5217|5880|6279|7037|7171|7454|7456|8027|8086|10788|50619|55240|81027|84681|157769	ARHGDIB|CSK|CYBB|DBT|HSP90AB1|MCAM|NDUFS3|PAFAH1B1|PFN2|RAC2|S100A8|TFRC|TPM4|WAS|WIPF1|STAM|AAAS|IQGAP2|DEF6|STEAP3|TUBB1|HINT2|FAM91A1	-3.9
Reactome Gene Sets	6	R-HSA-194315	IM-LGD-L	Signaling by Rho GTPases	-7	2.2	6	30286	706	1012	52	5.1	0.69	397|1072|1152|1445|1629|2010|2631|3014|3320|3954|3998|4001|4580|4637|4698|4722|5216|5217|5880|5905|6279|7037|7454|7919|8027|8976|9826|10095|10109|10250|10424|10552|10726|10788|10970|11135|11140|11329|22919|23075|23092|23513|23592|25813|30851|55920|56254|56667|64837|79869|84681|121512	ARHGDIB|CFL1|CKB|CSK|DBT|EMD|NIPSNAP2|H2AX|HSP90AA1|LETM1|LMAN1|LMNB1|MTX1|MYL6|NDUFA5|NDUFS3|PFN1|PFN2|RAC2|RANGAP1|S100A8|TFRC|WAS|DDX39B|STAM|WASL|ARHGEF11|ARPC1B|ARPC2|SRRM1|PGRMC2|ARPC1A|NUDC|IQGAP2|CKAP4|CDC42EP1|CDC37|STK38|MAPRE1|SWAP70|ARHGAP26|SCRIB|LEMD3|SAMM50|TAX1BP3|RCC2|RNF20|MUC13|KLC2|CPSF7|HINT2|FGD4	-5.8
Reactome Gene Sets	6	R-HSA-9716542	GASTRITIS	Signaling by Rho GTPases, Miro GTPases and RHOBTB3	-10	2.8	7.8	30286	722	724	49	6.8	0.93	391|397|1152|1445|1536|1629|1794|2185|2631|3163|3320|3326|3954|4001|4162|4698|4722|5048|5217|5880|6279|6793|7037|7171|7415|7431|7456|7529|8027|8976|10095|10211|10250|23048|23075|23513|23526|23592|25813|50619|55240|55920|56254|56667|84617|84681|89941|121512|157769	RHOG|ARHGDIB|CKB|CSK|CYBB|DBT|DOCK2|PTK2B|NIPSNAP2|HMOX2|HSP90AA1|HSP90AB1|LETM1|LMNB1|MCAM|NDUFA5|NDUFS3|PAFAH1B1|PFN2|RAC2|S100A8|STK10|TFRC|TPM4|VCP|VIM|WIPF1|YWHAB|STAM|WASL|ARPC1B|FLOT1|SRRM1|FNBP1|SWAP70|SCRIB|ARHGAP45|LEMD3|SAMM50|DEF6|STEAP3|RCC2|RNF20|MUC13|TUBB6|HINT2|RHOT2|FGD4|FAM91A1	-8.7
Reactome Gene Sets	6	R-HSA-9716542	IM-LGD-L	Signaling by Rho GTPases, Miro GTPases and RHOBTB3	-7.4	2.2	6.3	30286	722	1012	54	5.3	0.71	397|1072|1152|1445|1629|2010|2631|3014|3320|3954|3998|4001|4580|4637|4698|4722|5216|5217|5880|5905|6279|7037|7454|7919|8027|8976|9826|9927|10095|10109|10250|10424|10552|10726|10788|10970|11135|11140|11329|22919|23075|23092|23513|23592|25813|30851|55920|56254|56667|64837|79869|84681|89941|121512	ARHGDIB|CFL1|CKB|CSK|DBT|EMD|NIPSNAP2|H2AX|HSP90AA1|LETM1|LMAN1|LMNB1|MTX1|MYL6|NDUFA5|NDUFS3|PFN1|PFN2|RAC2|RANGAP1|S100A8|TFRC|WAS|DDX39B|STAM|WASL|ARHGEF11|MFN2|ARPC1B|ARPC2|SRRM1|PGRMC2|ARPC1A|NUDC|IQGAP2|CKAP4|CDC42EP1|CDC37|STK38|MAPRE1|SWAP70|ARHGAP26|SCRIB|LEMD3|SAMM50|TAX1BP3|RCC2|RNF20|MUC13|KLC2|CPSF7|HINT2|RHOT2|FGD4	-6.2
Reactome Gene Sets	6	R-HSA-9716542	IM-LGD-NL	Signaling by Rho GTPases, Miro GTPases and RHOBTB3	-5.2	2.9	5.4	30286	722	333	23	6.9	1.4	397|1445|1536|1629|3326|4162|4722|5048|5217|5880|6279|7037|7171|7454|7456|8027|8086|10788|50619|55240|81027|84681|157769	ARHGDIB|CSK|CYBB|DBT|HSP90AB1|MCAM|NDUFS3|PAFAH1B1|PFN2|RAC2|S100A8|TFRC|TPM4|WAS|WIPF1|STAM|AAAS|IQGAP2|DEF6|STEAP3|TUBB1|HINT2|FAM91A1	-3.8
[truncated: 264 more rows]

## Sheet: High Z-score
R-HSA-1428517	Aerobic respiration and respiratory electron transport
IM-LGD-NL	GC-NL	CG	IM-LGD-L	EGC-L	GC-L	Common	EGC-L GC-L GC-NL IM-LGD-L	GC-NL		IM-LGD-NL
"COX4I1"	"ACAT1"	"ACAT1"	"ACAT1"	"ACAT1"	"ATP5PB"	"UQCRFS1"	"MDH1"	"LYRM4"		Protein	Normality_Healthy_p	Normality_Tumor_p	Levene_P_Value	Test_Used	P_Value
"COX6C"	"ACO2"	"ACO2"	"ACO2"	"ACO2"	"COX4I1"	"VDAC1"	3L	"NDUFAF4"		UQCRFS1	TRUE	TRUE	0.0945	Unpaired t-test (equal variances)	0.0202
"ME2"	"ATP5F1B"	"ATP5F1B"	"ATP5F1B"	"ATP5F1B"	"COX6C"	"COX4I1"	"NDUFB6"	"RPS27A"		VDAC1	TRUE	TRUE	0.0843	Unpaired t-test (equal variances)	0.00243
[truncated: 90 more rows]

## Sheet: Unique all pathway (high score)
R-HSA-6798695	Neutrophil degranulation
[truncated: 96 more rows]

## Sheet: Only EGC-L vs GC-NL
R-HSA-72312	rRNA processing
[truncated: 65 more rows]

[truncated: 3 more sheets: Only in 3L, In GC-L, Not in GC-L]
