# Supplementary material for: Mass spectrometry-based proteomics to study gastric carcinogenesis: pathophysiological molecular characterization
Source: Research Square preprint supplement (doi:10.21203/rs.3.rs-7685514/v1), 2025-10-23
Supplement: Supplementary file 3 [file d8d5c4e8d7b5ae7aecc43b87.xlsx]

## Sheet: Contents
Supplementary Table Legend
Table S2. VennDiagrams. Proteins are deregulated depending on the tissue type. Commonalities and exclusivities between lesional and non-lesional tissue.

## Sheet: Common and unique
Lesion	Non-lesional	Exclusively L	Common	Exclusively NL		Category	GO	Description	LogP	Enrichment	Z-score	#TotalGeneInLibrary	#GeneInGO	#GeneInHitList	%InGO	STDV %InGO	Hits	Log(q-value)	GeneList
NDUFB6	BHMT	NDUFB6	MAGI1	BHMT		Reactome Gene Sets	R-HSA-8978868	Fatty acid metabolism	-3.7	14	7	30284	162	53	7.5	3.6	SLC25A20|HSD17B12|ACSF3|SLC27A1	-0.46	Lesion
MTCH1	BCL2L13	EEPD1	NLRX1	BCL2L13		Reactome Gene Sets	R-HSA-556833	Metabolism of lipids	-2.9	5	4.4	30284	691	53	11	4.4	SLC25A20|CHKB|PI4KA|HSD17B12|ACSF3|SLC27A1	0	Lesion
MDH1	TSPO	SPG7	CHKB	TSPO		Reactome Gene Sets	R-HSA-6798695	Neutrophil degranulation	-2.2	5.3	3.7	30284	435	53	7.5	3.6	CDA|MGST1|S100A11|OLFM4	0	Lesion
SPG7	MAGI1	MTCH1	TIGAR	DPF2		Reactome Gene Sets	R-HSA-425407	SLC-mediated transmembrane transport	-2.1	7.4	4.1	30284	231	53	5.7	3.2	SLC25A10|SLC25A1|SLC27A1	0	Lesion
SLC25A1	DPF2	MDH1		CISD3		Reactome Gene Sets	R-HSA-9006931	Signaling by Nuclear Receptors	-2	6.8	3.9	30284	253	53	5.7	3.2	GTF2F1|RDH11|EEPD1	0	Lesion
SLC25A20	CISD3	SLC25A1		NDUFV2		Reactome Gene Sets	R-HSA-6798695	Neutrophil degranulation	-3.6	8.7	5.9	30284	435	40	12	5.2	CTSZ|GYG1|ITGB2|PRTN3|GGH	-0.46	Non-lesional
MGST1	NDUFV2	SLC27A1		AP1S1		Reactome Gene Sets	R-HSA-1280215	Cytokine Signaling in Immune system	-2.8	5.8	4.5	30284	651	40	12	5.2	HLA-DPB1|HLA-DRA|ITGB2|PRTN3|NLRX1	0	Non-lesional
MAGI1	NLRX1	SLC25A6		CIRBP		Reactome Gene Sets	R-HSA-5668914	Diseases of metabolism	-2.4	9.3	4.8	30284	243	40	7.5	4.2	FMO3|GYG1|MUC2	0	Non-lesional
NLRX1	CHKB	COMTD1		CHDH		Reactome Gene Sets	R-HSA-71291	Metabolism of amino acids and derivatives	-2	6.8	3.9	30284	336	40	7.5	4.2	BHMT|CHDH|ASRGL1	0	Non-lesional
COMTD1	AP1S1	SLC25A10		GGACT
EEPD1	CIRBP	MGST1		SVIL
SLC25A6	CHDH	SLC25A20		GGH
SLC27A1	GGACT	HSD17B12		C1QC
HSD17B12	TIGAR	PI4KA		ZYX
MTCH2	SVIL	RDH11		RNF181
SLC25A10	GGH	SCCPDH		PROCR
PNKD	C1QC	GOLT1B		GYG1
GOLT1B	ZYX	MTCH2		HLA-DRA
RDH11	RNF181	MFN2		SMC2
SFXN2	PROCR	NBAS		PLEKHO2
CHKB	GYG1	TMEM11		ASRGL1
SCCPDH	HLA-DRA	ACSF3		DPYSL3
MFN2	SMC2	ALDH9A1		CTSZ
TMEM11	PLEKHO2	SFXN2		COL6A2
ALDH9A1	ASRGL1	SKIC3		TFRC
NBAS	DPYSL3	SKIC2		LPXN
PI4KA	CTSZ	NFKBIE		ITGB2
SKIC3	COL6A2	KIAA1217		FLVCR1
ACSF3	TFRC	GTF2F1		FMO3
SKIC2	LPXN	EIF6		MUC2
GTF2F1	ITGB2	DNAJC8		GSKIP
UBQLN4	FLVCR1	RP2		CRNN
DNAJC8	FMO3	AGFG1		CLCA1
KIAA1217	MUC2	UBQLN4		PRTN3
AGFG1	GSKIP	SQSTM1		HLA-DPB1
NFKBIE	CRNN	S100A11		MZB1
EIF6	CLCA1	IFI35
S100A11	PRTN3	MDK
IFI35	HLA-DPB1	PAWR
SQSTM1	MZB1	EPPK1
TIGAR		BAZ1B
PLCB3		PLCB3
RP2		CDA
PAWR		RPUSD2
EPPK1		KRT7
BAZ1B		BRIX1
KRT7		APOE
APOE		ITLN1
MDK		OLFM4
RPUSD2		PNKD
CDA
BRIX1
ITLN1
OLFM4
